# Supplementary material for: Eosin-Y/Cu(OAc)2-catalyzed aerobic oxidative coupling reactions of glycine esters in the dark
Source: Royal Society of Chemistry journal article supplement (doi:10.1039/d2ob00678b), 2022-01-01

## Supporting Information

### **Eosin-Y/Cu(OAc)<sub>2</sub> Catalyzed Aerobic Oxidative Coupling Reaction of Glycine Esters in the Dark**

Raghunath Chowdhury,<sup>\*a,b</sup>

<sup>a</sup>Bio-Organic Division, Bhabha Atomic Research Centre, Trombay, Mumbai 400085

<sup>b</sup>Homi Bhabha National Institute, Anushaktinagar, Mumbai-400094

Fax: +91-22-25505151

E-mail: [raghuc@barc.gov.in](mailto:raghuc@barc.gov.in)

#### **Table of content**

---

|    |                                                                              |          |
|----|------------------------------------------------------------------------------|----------|
| 1  | General experimental                                                         | S2       |
| 2  | Optimization study                                                           | S3-S5    |
| 3  | Experimental setup                                                           | S6       |
| 4  | Mechanistic study                                                            | S6-S11   |
| 5  | UV-Vis absorption spectra                                                    | S11-S13  |
| 6  | Cyclic Voltammograms                                                         | S13-S14  |
| 7  | XPS study                                                                    | S14-S15  |
| 8  | Mechanistic study of eosin-Y catalysed reaction                              | S16-S20  |
| 9  | Preparation of Substrates <b>1</b> and <b>2</b>                              | S20-22   |
| 10 | General procedure for the synthesis of product <b>3a-3p</b> and <b>4a-4j</b> | S23      |
| 11 | Characterization data                                                        | S24-S39  |
| 12 | References                                                                   | S39-S40  |
| 13 | Copies of NMR Spectra                                                        | S41-S102 |

---

## 1. General experimental

Solvent removal was performed with a rotary evaporator that was connected to a dry ice condenser. TLC was carried out using Merck TLC plate. Column chromatography was performed on silica gel (230-400 mesh). The  $^1\text{H}$  and  $^{13}\text{C}$  NMR spectroscopic data were recorded with 600 MHz ( $^1\text{H}$  NMR: 600 MHz,  $^{13}\text{C}$  NMR: 150 MHz), 600 MHz ( $^1\text{H}$  NMR: 600 MHz,  $^{13}\text{C}$  NMR: 150 MHz) Jeol spectrometer, 300 MHz ( $^1\text{H}$  NMR), and 800 MHz ( $^{13}\text{C}$  NMR: 200 MHz) Bruker spectrometer. The  $^1\text{H}$  and  $^{13}\text{C}$  chemical shifts are given in ppm ( $\delta$  scale) and are measured relative to  $\text{CHCl}_3$  (7.27 ppm) and  $\text{CDCl}_3$  (77.0 ppm), respectively. High resolution mass spectra were recorded under ESI-Q-TOF conditions. Melting points (mp) were measured in a Büchi B-540 apparatus and uncorrected. ATR was recorded in Bruker tensor II. All the solvents were distilled out prior to use. Solvent were dried according to literature procedure. 1,2-dichloroethane was distilled over  $\text{CaH}_2$  and stored over 4Å molecular sieves. Eosin Y (dye content~99%) was purchased from Sigma-Aldrich and used as received. Rhodamine 6G was purchased from sigma and used as received.  $\text{Ru}(\text{bpy})_3\text{PF}_6$ , Mes-Acr $^+\text{ClO}_4^-$  and Eosin Y disodium salt were purchased from TCI chemicals and used as received.  $\text{Cu}(\text{OAc})_2$  was purchased from Merck and used as received. The electrochemical measurements were performed at room temperature ( $T = 298\text{ K}$ ) using a CHI 760D electrochemical workstation in a conventional three-electrode cell. All electrodes are procured from CH Instruments, Inc. Pt ( $\Phi = 2\text{ mm}$ ), Pt wire gauze and  $\text{Ag}/\text{AgCl}/3\text{M KCl}$  ( $E_{\text{Ag}/\text{AgCl}}^0 = +0.210\text{ V}$  vs. standard hydrogen electrode, SHE). XPS data was collected from X-ray photo-spectrometer and UPS model K-alpha (Make- M/s Thermo Fisher Scientific Instruments UK). Photochemical reactions were carried out in Aldrich® Micro Photochemical Reactor, blue LED lights (435-445nm). Ground-state absorption spectra were recorded with the help of UV-Visible Spectrophotometer (model# V-650) from JASCO.

## 2. Table S1. Optimization study under blue light irradiation<sup>a</sup>

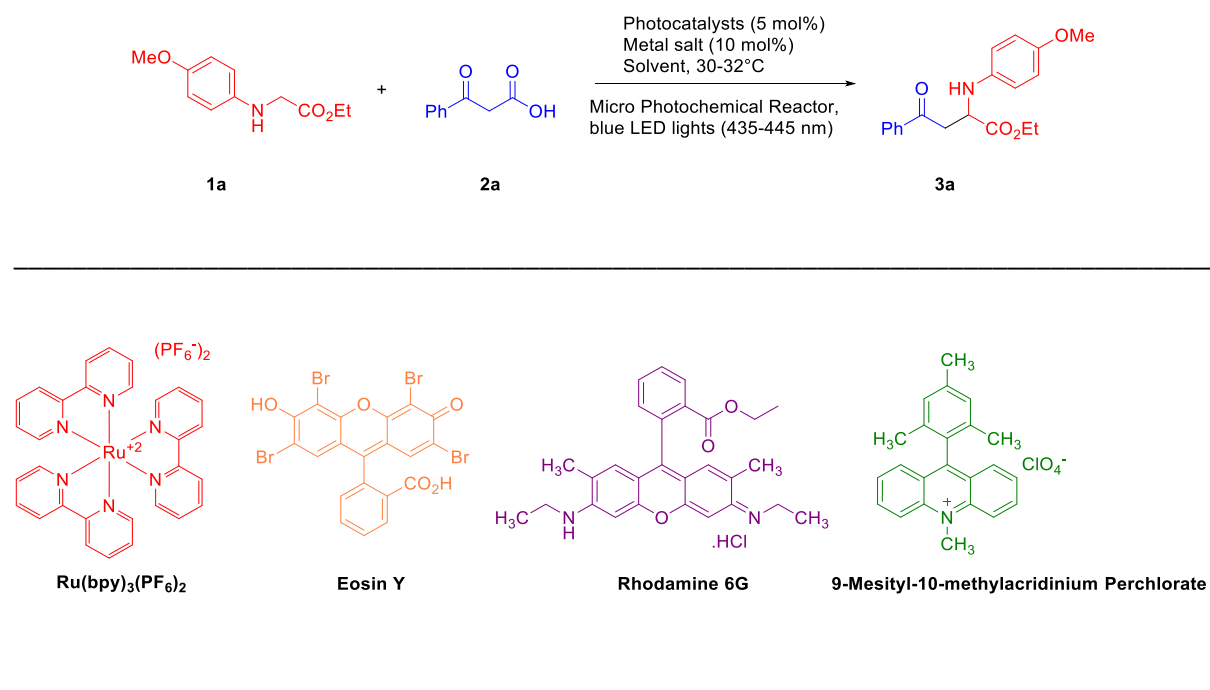

| Entry          | Catalyst (mol%)                                        | Metal Salt (mol%)                         | Time (h) | Solvent            | Oxidant                  | <b>3a<sup>b</sup></b> |
|----------------|--------------------------------------------------------|-------------------------------------------|----------|--------------------|--------------------------|-----------------------|
| 1 <sup>c</sup> | Ru(bpy) <sub>3</sub> PF <sub>6</sub> (5)               | Cu(OAc) <sub>2</sub> (10)                 | 5+2      | CH <sub>3</sub> CN | O <sub>2</sub> (balloon) | 62                    |
| 2              | Eosin Y (5)                                            | Cu(OAc) <sub>2</sub> (10)                 | 4+2      | CH <sub>3</sub> CN | O <sub>2</sub> (balloon) | 70                    |
| 3 <sup>c</sup> | Rhodamine 6G (5)                                       | Cu(OAc) <sub>2</sub> (10)                 | 24+2     | CH <sub>3</sub> CN | O <sub>2</sub> (balloon) | 48                    |
| 4              | Mes-Acr <sup>+</sup> ClO <sub>4</sub> <sup>-</sup> (5) | Cu(OAc) <sub>2</sub> (10)                 | 8        | DCE                | Air                      | NR <sup>d</sup>       |
| 5              | eosin-Y (5)                                            | Cu(OAc) <sub>2</sub> (10)                 | 4+2      | CH <sub>3</sub> CN | Air                      | 71                    |
| 6              | eosin-Y (5)                                            | Cu(OAc) <sub>2</sub> (10)                 | 4+2      | DCE                | Air                      | 78                    |
| 7              | eosin-Y (5)                                            | Cu(OAc) <sub>2</sub> (10)                 | 4+2      | Toluene            | Air                      | 69                    |
| 8              | eosin-Y (5)                                            | CuSO <sub>4</sub> ·5H <sub>2</sub> O (10) | 4+2      | DCE                | Air                      | 58                    |
| 9              | eosin-Y (5)                                            | FeSO <sub>4</sub> ·7H <sub>2</sub> O (10) | 4+2      | DCE                | Air                      | 50                    |
| <b>10</b>      | <b>eosin-Y (2)</b>                                     | <b>Cu(OAc)<sub>2</sub> (5)</b>            | 4+2      | <b>DCE</b>         | <b>Air</b>               | <b>77</b>             |
| 11             | -----                                                  | Cu(OAc) <sub>2</sub> (5)                  | 8        | DCE                | Air                      | NR                    |
| 12             | eosin-Y (2)                                            | Cu(OAc) <sub>2</sub> (5)                  | 8+2      | DCE                | Argon                    | trace                 |

<sup>a</sup>Two 4-mL clear glass vials (Supelco®) equipped with a PTFE septum and magnetic stirring bar, each one was charged with glycinate ester **1a** (0.2 mmol, ~42 mg) and photocatalyst (2-5 mol%). In each vial, dry solvent (1.0 mL) was added via syringe followed by addition of Cu(OAc)<sub>2</sub> (5-10 mol%). Then the reaction mixture was irradiated in Aldrich® Micro Photochemical Reactor, blue LED lights (435-445 nm) at a distance of 2 cm under air atmosphere at room temperature (30-32°C). Once the glycinate ester **1a** was consumed (monitored by TLC), the irradiation was stopped. Then, β-ketoacid **2a** (0.6 mmol) was added in one shot. The reaction mixture was further stirred for 2h without irradiation. After completion of the reaction (monitored by TLC), the reaction mixture (combined both the vials) was directly loaded to column and purified by column chromatography on silica gel (petroleum ether/EtOAc as the eluent) to afford product **3a**. <sup>b</sup> Isolated yield after column chromatography. <sup>c</sup> Incomplete reaction (first step). <sup>d</sup>No imine formation, only starting material.

**Table S2. Optimization study in the dark<sup>a</sup>**

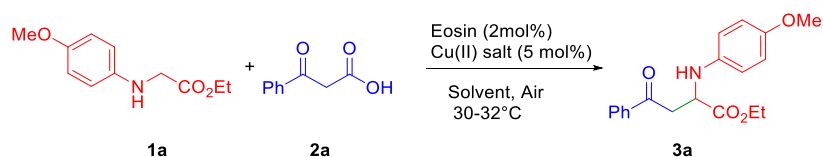

| Entry          | Eosin Y (mol%) | Cu(II) Salt (mol%)                       | Solvent                                       | Time (h) | <b>3a</b> <sup>b</sup> |
|----------------|----------------|------------------------------------------|-----------------------------------------------|----------|------------------------|
| 1              | eosin-Y (2)    | Cu(OAc) <sub>2</sub> (5)                 | DCE                                           | 8+2      | 78                     |
| 2              | eosin-Y (2)    | Cu(OAc) <sub>2</sub> (5)                 | CH <sub>3</sub> CN                            | 8+2      | 73                     |
| 3              | eosin-Y (2)    | Cu(OAc) <sub>2</sub> (5)                 | Toluene                                       | 8+2      | 75                     |
| 4              | eosin-Y (2)    | Cu(OAc) <sub>2</sub> (5)                 | C <sub>6</sub> H <sub>5</sub> CF <sub>3</sub> | 8+2      | 72                     |
| 5              | eosin-Y (2)    | CuSO <sub>4</sub> ·5H <sub>2</sub> O (5) | DCE                                           | 8+2      | 70                     |
| 6              | eosin-Y (2)    | CuCl <sub>2</sub> (5)                    | DCE                                           | 8+2      | 74                     |
| 7 <sup>c</sup> | eosin-Y (2)    | Cu(OAc) <sub>2</sub> (5)                 | DCE                                           | 8+2      | 68                     |

|                  |             |                           |     |     |                 |
|------------------|-------------|---------------------------|-----|-----|-----------------|
| 8 <sup>d</sup>   | eosin-Y (4) | Cu(OAc) <sub>2</sub> (10) | DCE | 8+2 | 77              |
| 9 <sup>e,f</sup> | eosin-Y (2) | -                         | DCE | 8+2 | 24              |
| 10 <sup>g</sup>  | -           | Cu(OAc) <sub>2</sub> (5)  | DCE | 8+2 | NR              |
| 12 <sup>h</sup>  | eosin-Y (2) | Cu(OAc) <sub>2</sub> (5)  | DCE | 8   | NA <sup>h</sup> |

<sup>a</sup>Unless otherwise stated, reactions were carried out with 0.4 mmol of **1a**, eosin-Y (2 mol%), Cu(II) salt (5 mol%), solvent (2 mL) under dark in air for 8h at 30-32 °C, then **2a** (0.6 mmol) was added and stirred for another 2h. <sup>b</sup>Isolated yield of the product after column chromatography. <sup>c</sup>20 mol% of Et<sub>3</sub>N was added after the addition of β-ketoacid **2a**. <sup>d</sup>the reaction was carried out using 4 mol% eosin Y. <sup>e</sup>the reaction was carried out using freshly dried DCE. <sup>f</sup>first step of the reaction remained incomplete and the yield of the first step is not reproducible. <sup>g</sup>the reaction was conducted in absence of eosin Y, no imine formation was observed. <sup>h</sup> A 4-mL clear glass vials equipped with a PTFE septum and magnetic stirring bar was charged with glycinate ester **1a** (0.4 mmol, ~84 mg), Eosin Y (2 mol%) and Cu(OAc)<sub>2</sub> (5 mol%). The vial was wrapped in aluminium foil and degassed for 50 min by bubbling argon stream. Then under argon atmosphere, dry degassed DCE (1.0 mL) was added via syringe and the reaction mixture was stirred for 8h. small amount of imine formation was observed. (both the reaction mixture and DCE were degassed for 50 min by bubbling argon stream).

---

<sup>#</sup>It should be noted the above reaction is super-sensitive to oxygen (air). Therefore, for oxygen free reactions, all the weighing of reagents and drying of DCE were carried out under argon atmosphere.

### 3. Experimental setup

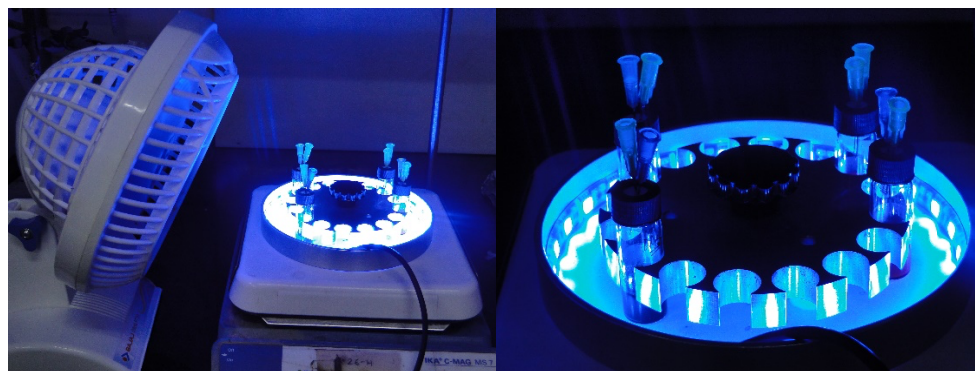

**Figure S1:** left: Reaction set-up used for the photochemical reaction. Right: Photoreactor (Aldrich® Micro Photochemical Reactor, blue LED lights, 435-445 nm) used in this study.

### 4. Mechanistic study

#### eosin-Y/Cu(OAc)<sub>2</sub> complex catalysed reaction

When the radical scavenger 2,6-di-tert-butyl-4-methylphenol (BHT) was added into the solution of **1a** under standard reaction conditions (**Scheme S1a**), very small amount of imine intermediate **5** was observed (**1a/5** = 92:8) and the BHT trapped product **7** was detected in HRMS (**Figure S2**). However, when the reaction of **1a** was carried out in presence of radical scavenger TEMPO (2.0 equiv), desired imine intermediate **5** was formed as the major product and at the same time TEMPO addition adduct **8** was identified in mass-spectrometry (**Figure S3**). Addition of  $\beta$ -ketoacid **2a** to this solution and stirring for 2h, the desired product **3a** was isolated with 71% yield (**Scheme S1b**). Probably, TEMPO is involved in the catalytic cycle<sup>1,2</sup> which facilitated the imine **5** formation.

These facts indicate that a radical process may be involved in this first step of this method.

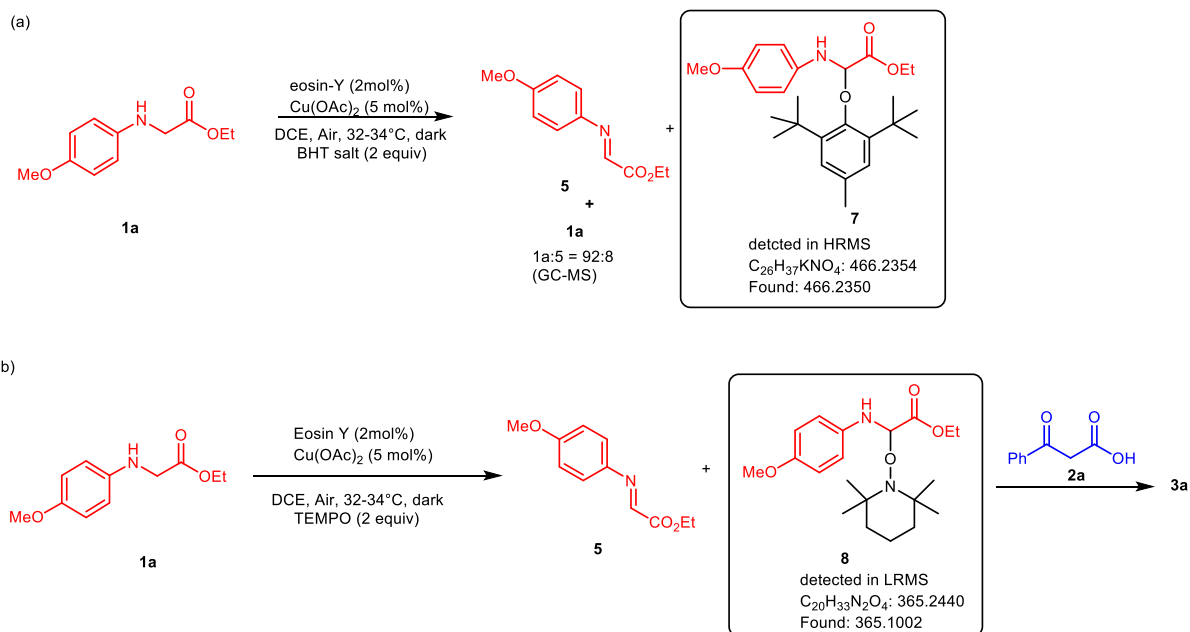

**Scheme S1:** Mechanistic experiments

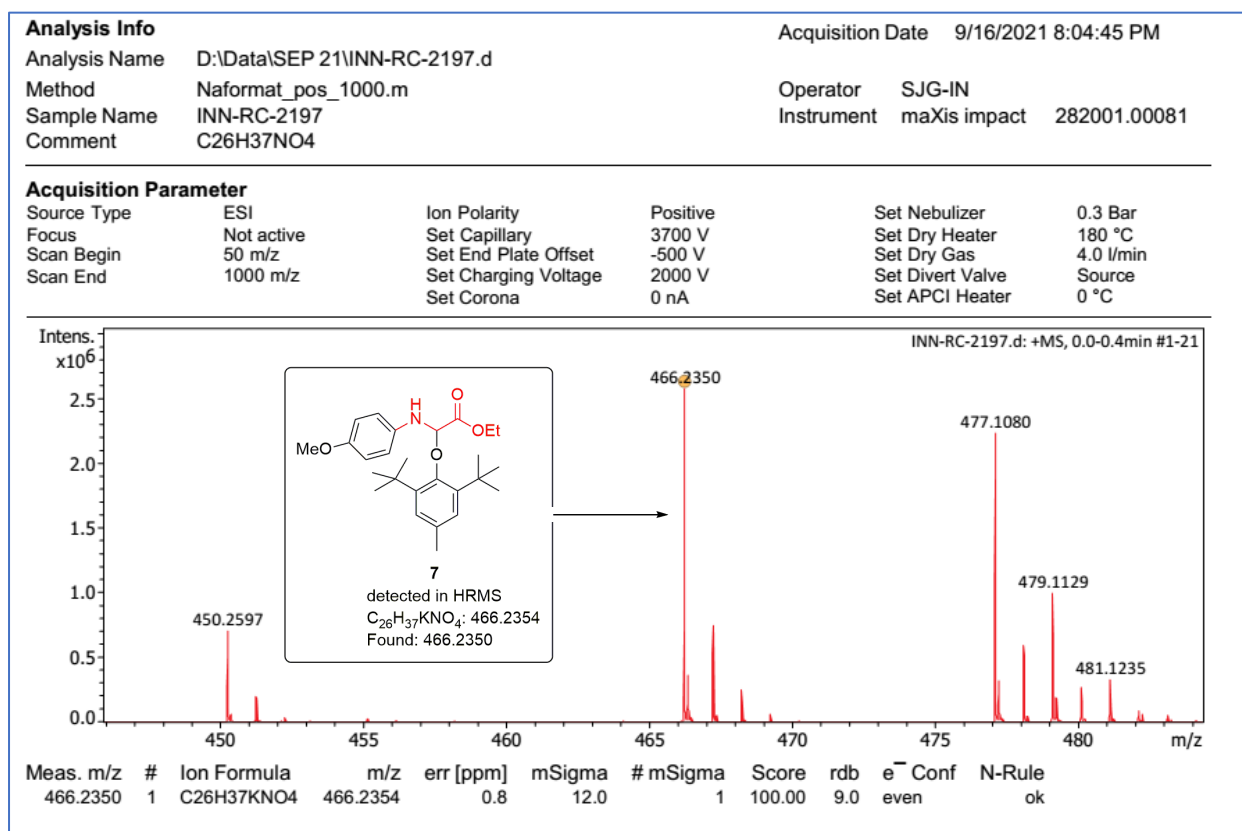

**Figure S2:** HRMS analysis of the reaction mixture (1a, BHT salt under standard reaction conditions)

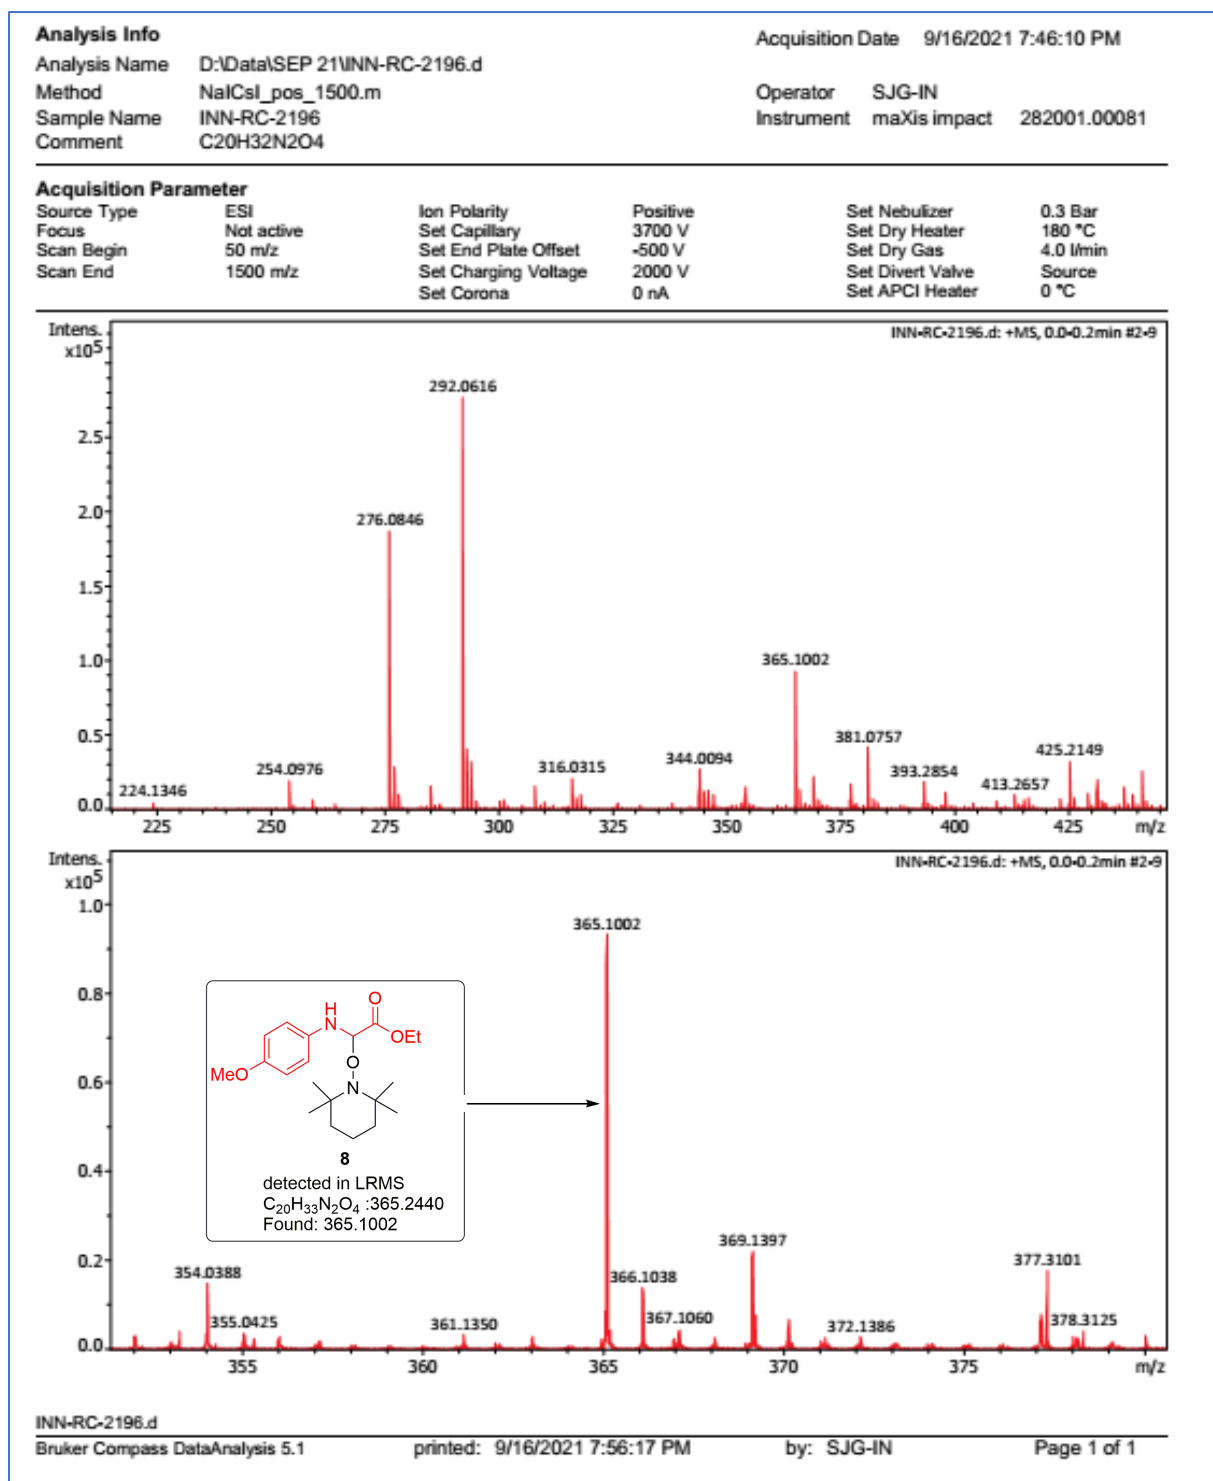

**Figure S3:** LRMS analysis of the reaction mixture (**1a**, TEMPO under standard reaction conditions)

Next, effort was given to probe the decarboxylation step since there is feasibility of two reaction pathway-(i) nucleophilic addition of  $\beta$ -ketoacid to imine **5** followed by decarboxylation or (ii)



decarboxylation of  $\beta$ -ketoacid to form ketone enolate equivalent and subsequent addition to the imine **5**.

Stirring the solution of **1a** in presence of eosin-Y (2 mol%) and  $\text{Cu}(\text{OAc})_2$  in DCE under air in dark or irradiation of light for 8 h followed by addition of 1.5 equivalent of acetophenone **10**, the product **3a** was not observed (**Scheme S2a**).

In situ electrospray ionization mass spectroscopy analysis of the reaction mixture (**1a**, **2a** in presence of eosin-Y 2 mol% and  $\text{Cu}(\text{OAc})_2$  in DCE) under standard reaction conditions (**Scheme S2b**), the peak at  $m/z$  410.1001 was observed which correspond to the adduct **9**+K (**Figure S4**).

These experimental finding suggested that the reaction operates by nucleophilic addition of  $\beta$ -ketoacid **2a** to imine **5** and subsequent decarboxylation step.

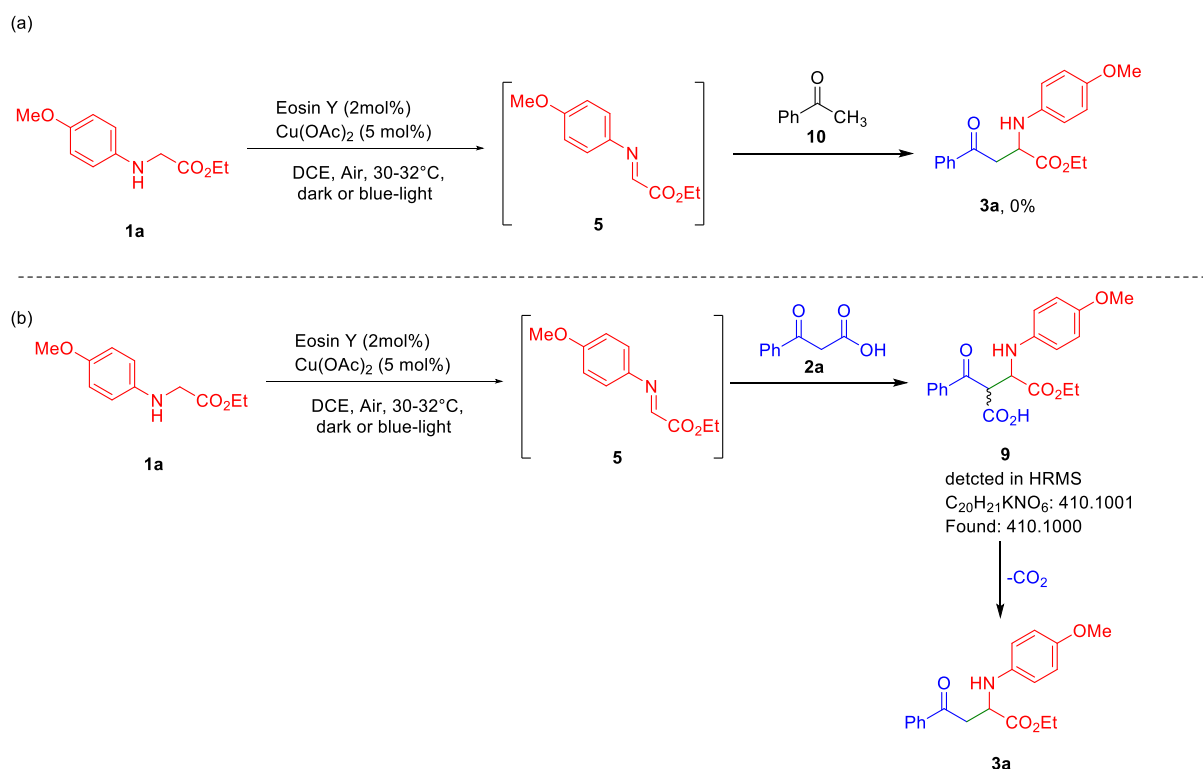

**Scheme S2:** Mechanistic experiments.

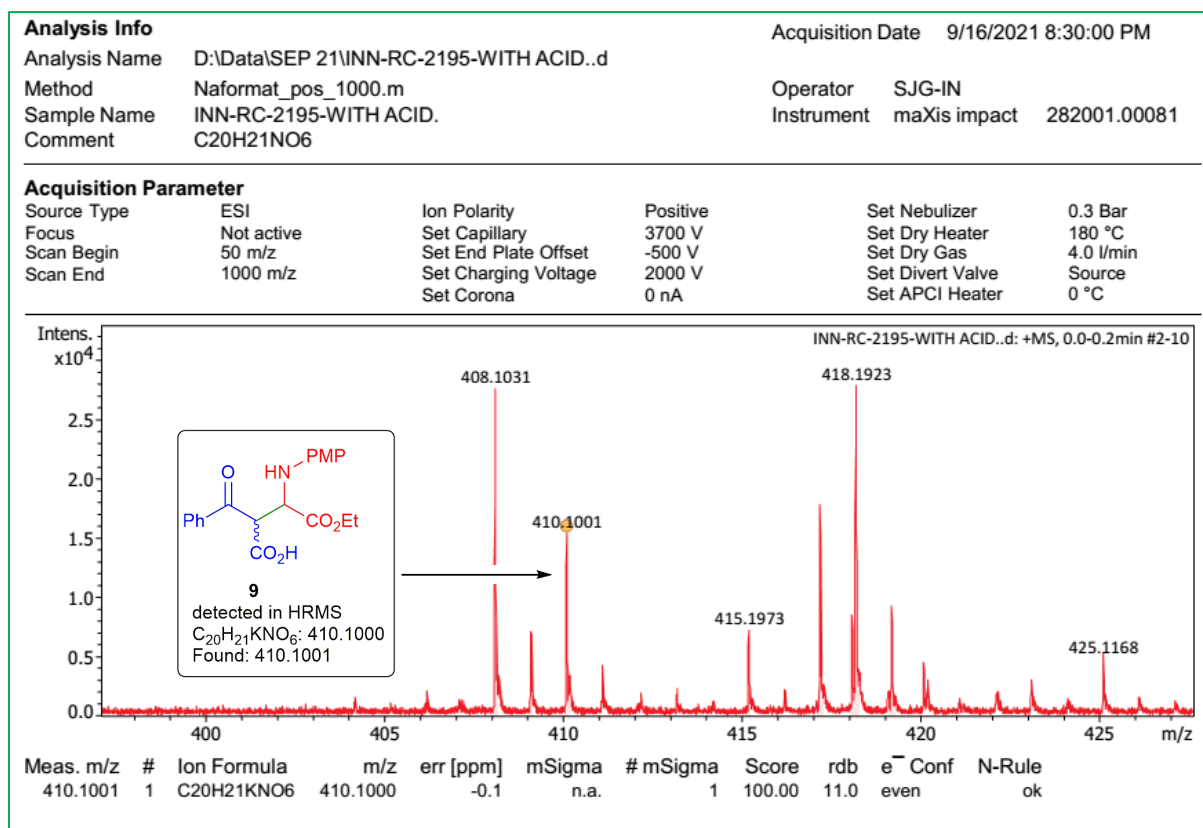

**Figure S4:** HRMS analysis of the reaction mixture (**1a**, **2a** under optimized conditions)

### Detection of H<sub>2</sub>O<sub>2</sub> in the reaction mixture:<sup>3</sup>

To an oven dried 25mL round bottom flask (wrapped in aluminium foil) with a magnetic stirring bar were added glycinate ester **1** (0.8 mmol, 1 equiv) and eosin Y (10.2 mg, 0.008 mmol, 2 mol%). Then 4mL of dry DCE was added via syringe followed by addition of Cu(OAc)<sub>2</sub> (7.32 mg, 5 mol%). The reaction mixture was stirred (for 8h) under air at room temperature (25-27 °C). After completion of the reaction, the reaction mixture was poured into a separatory funnel and dichloromethane (60 ml) was added. This organic phase was extracted with distilled water (4×20 mL). The combined aqueous solution was passed through activated charcoal followed by celite. To this aqueous solution, 2 M H<sub>2</sub>SO<sub>4</sub> (6 ml) and aqueous solution of KI (0.8 mmol in 5 mL H<sub>2</sub>O) were added and stirred well. Then, 3mL of freshly prepared starch solution was added and stirred vigorously. Within 2-3 min, the aqueous solution turned to deep blue color.

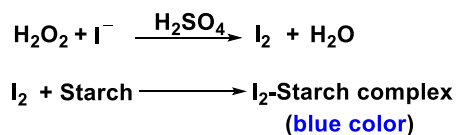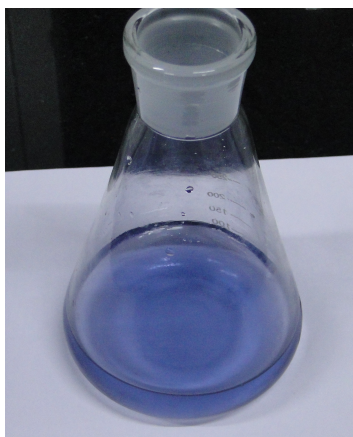

**Figure S5:** Detection of  $\text{H}_2\text{O}_2$  via KI-Starch experiment

## 5. UV-Vis absorption spectra

The titration of eosin Y with  $\text{Cu}(\text{OAc})_2$  was carried out. It was observed that with progressive addition of  $\text{Cu}(\text{OAc})_2$ , the  $\lambda_{\text{max}}$  of eosin Y increases (**Figure S6**). This may be due to chelation of  $\text{Cu}(\text{II})$  with eosin-Y.<sup>4</sup>

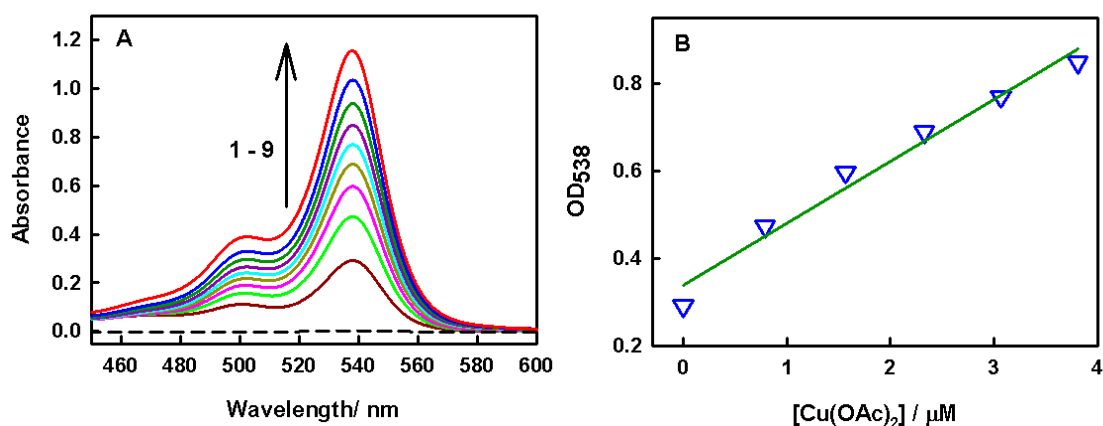

**Figure S6:** (A) Ground-state absorption spectra of 40  $\mu\text{M}$  eosin-Y in acetonitrile (degassed) with increasing concentrations of  $\text{Cu}(\text{OAc})_2$  (1) 0  $\mu\text{M}$  (2) 0.79  $\mu\text{M}$  (3) 1.57  $\mu\text{M}$  (4) 2.3  $\mu\text{M}$  (5) 3.1  $\mu\text{M}$  (6) 3.8  $\mu\text{M}$  (7) 5.2  $\mu\text{M}$  (8) 6.6  $\mu\text{M}$  (9) 10.4  $\mu\text{M}$ . The dashed black line represents the absorption spectrum of 10.4  $\mu\text{M}$   $\text{Cu}(\text{OAc})_2$  in acetonitrile. (B) Variation in the absorbance of

Eosin-Y at 538 nm with increasing concentrations of  $\text{Cu}(\text{OAc})_2$ . The solid green line represents the linear fit to the data points.  $\text{OD}_{538} = 0.14 [\text{Cu}(\text{OAc})_2] / \mu\text{M} + 0.34$ ,  $R^2 = 0.968$ .

On the other hand, the interaction of glycine ester **1a** with ground state of eosin-Y was also observed (**Figure S7**) but it is less significant compared to the interaction of  $\text{Cu}(\text{OAc})_2$  with eosin-Y.

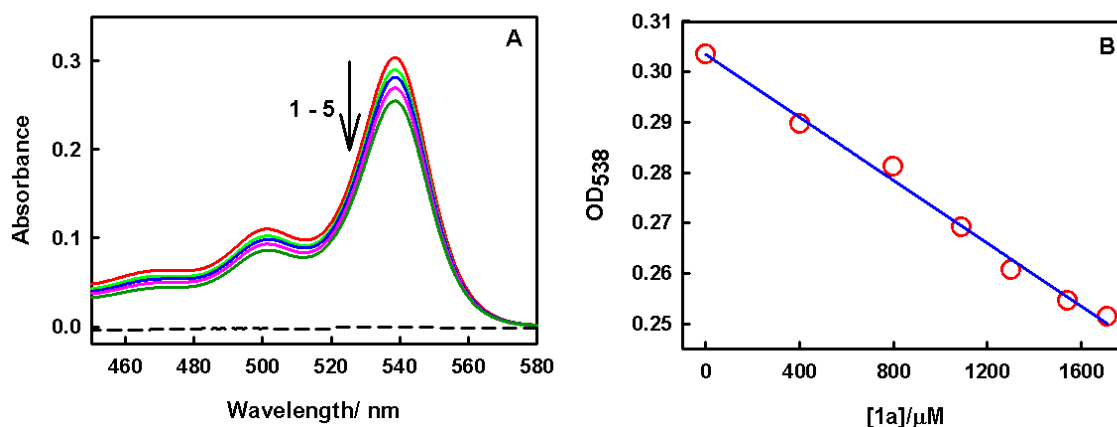

**Figure S7:** (A) Ground-state absorption spectra of 40  $\mu\text{M}$  eosin-Y in acetonitrile (degassed) with increasing concentrations of **1a** (1) 0  $\mu\text{M}$  (2) 400  $\mu\text{M}$  (3) 800  $\mu\text{M}$  (4) 1090  $\mu\text{M}$  (5) 1540  $\mu\text{M}$ . The dashed black line represents the absorption spectrum of 1540  $\mu\text{M}$  **1a** in acetonitrile. (B) Variation in the absorbance of eosin-Y at 538 nm with increasing concentrations of **1a**. The solid blue line represents the linear fit to the data points.  $\text{OD}_{538} = -3.12 \times 10^{-5} [1a] / \mu\text{M} + 0.303$ ,  $R^2 = 0.991$ .

Moreover, we found that with progressive addition of glycine ester **1a** into eosin-Y solution (40  $\mu\text{M}$  in  $\text{CH}_3\text{CN}$ ), the  $\lambda_{\text{max}}$  of eosin-Y decreases slightly. When  $\text{Cu}(\text{OAc})_2$  solution (80  $\mu\text{M}$  solution in  $\text{CH}_3\text{CN}$ ) was added to the mixture of glycine ester **1a** and eosin-Y, the  $\lambda_{\text{max}}$  of eosin-Y increases to a significant amount (**Figure S8**). These experimental observations disclose that the chelation of eosin-Y with  $\text{Cu}(\text{OAc})_2$  was stronger than that of with the glycine ester **1a**.

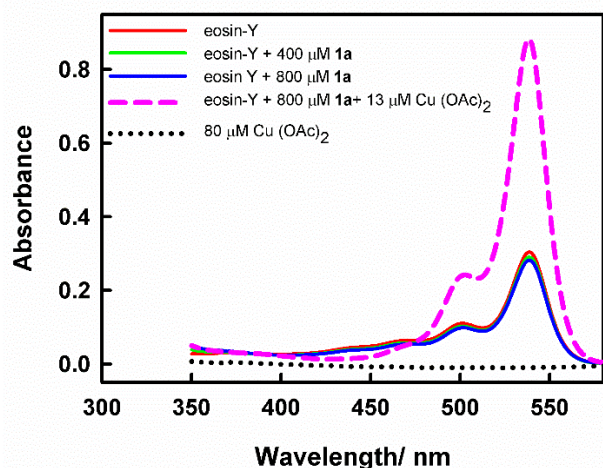

**Figure S8:** The UV-vis absorption spectra of eosin-Y, eosin-Y+ glycine ester **1a** and eosin-Y+ glycine ester **1a** + Cu(OAc)<sub>2</sub>

## 6. Cyclic Voltammograms

The electrochemical measurements are performed at room temperature ( $T = 298$  K) using a CHI 760D electrochemical workstation in a conventional three-electrode cell. All electrodes are procured from CH Instruments, Inc. Pt ( $\Phi = 2$  mm), Pt wire gauze and Ag/AgCl/3M KCl ( $E_{Ag/AgCl}^0 = +0.210$  V vs. standard hydrogen electrode, SHE) electrodes are used as the working, counter and the reference electrode, respectively. Unless specified, all the potentials quoted are with respect to Ag/AgCl. High purity argon gas is purged through the working solutions for 10 minutes to expel dissolved oxygen from solution prior to electrochemical experiments. The Pt working electrode which was cleaned electrochemically by repetitive CV scan ( $-0.5$  to  $1.5$  V) in  $1$  M  $H_2SO_4$  at a scan rate of  $100$   $mV\ s^{-1}$  (20–30 cycles).

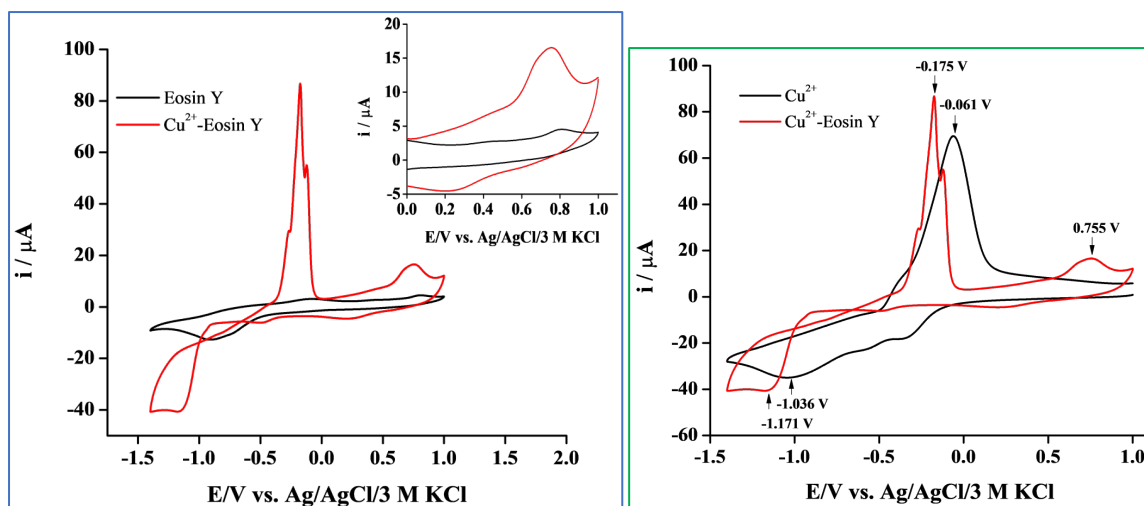

**Figure S9.** Left. Cyclic Voltammograms of Eosin Y (black line)  $2 \times 10^{-3}$  mol/L. The mixture of  $2 \times 10^{-3}$  mol/L eosin Y and  $5 \times 10^{-3}$  mol/L  $\text{Cu}(\text{OAc})_2$  (red line) in 0.1 M tetrabutyl ammonium hexafluorophosphate in acetonitrile using Pt electrode at a scan rate of  $100 \text{ mV s}^{-1}$ . Right: Cyclic Voltammograms of  $5 \times 10^{-3}$  mol/L  $\text{Cu}(\text{OAc})_2$  (black line). The mixture of  $2 \times 10^{-3}$  mol/L eosin Y and  $5 \times 10^{-3}$  mol/L  $\text{Cu}(\text{OAc})_2$  (red line) in 0.1 M tetrabutyl ammonium hexafluorophosphate in acetonitrile using Pt electrode at a scan rate of  $100 \text{ mV s}^{-1}$

The Eosin Y shows an oxidation peak at 0.812 V. On the other hand, the same amount of eosin-Y/ $\text{Cu}(\text{OAc})_2$  mixture shows almost at the same peak (0.755V) with much higher peak current density (**Figure S9**, Left, insert shows the zoomed portion,). No such peak was observed in the CV of  $\text{Cu}(\text{OAc})_2$  (**Figure S9**, right). Therefore, the enhancement in the peak current density may be due to chelation of eosin-Y with  $\text{Cu}(\text{OAc})_2$ .

## 7. XPS study of the eosin-Y/ $\text{Cu}(\text{OAc})_2$ mixture

**Preparation of eosin-Y/ $\text{Cu}(\text{OAc})_2$  mixture:** In a 100 mL oven dried round bottom flask equipped with a magnetic stirring bar and rubber septum, eosin-Y (64.7 mg, 0.1 mmol) and  $\text{Cu}(\text{OAc})_2$  (20 mg, 0.1 mmol) were taken. The flask was degassed and then dry DCE (25 ml) was added to the reaction flask under argon balloon. The solution was then stirred at room temperature for 1h at room temperature (24-25 °C). Next, 5 mL  $\text{CH}_3\text{CN}$  was added and the reaction mixture was stirred for another 30 minutes.

After that, solvent was removed in rotary evaporator. The residue was dried in vacuum and was used for XPS analysis.

X-ray photoelectron spectroscopic (XPS) analysis was carried out to elucidating the oxidation state of copper in the eosin-Y/Cu(OAc)<sub>2</sub> mixture (**Figure S10**). XPS detected the peak at 932.71 eV and 952.38 (**Figure S10**) which are characteristic binding energy values of Cu(I) 2p<sub>3/2</sub> and Cu 2p<sub>1/2</sub> and well-agreement with the reported values.<sup>4</sup> Moreover, the reported binding energy of copper (2p<sub>3/2</sub>) is 935.0 eV.<sup>5a</sup> In the eosin-Y/Cu(OAc)<sub>2</sub> mixture, XPS detected the peak of Cu(II) 2p<sub>3/2</sub> at 934.68. The shift of the peak of Cu(II) 2p<sub>3/2</sub> from 935 eV to 934.68 is probably due to chelation of Cu(II) with eosin-Y.<sup>5b-c</sup> The above experimental facts imply that there could be simultaneous formation of eosin-Y radical cation and Cu(I) from eosin-Y/Cu(OAc)<sub>2</sub> complex through inner-sphere electron transfer.

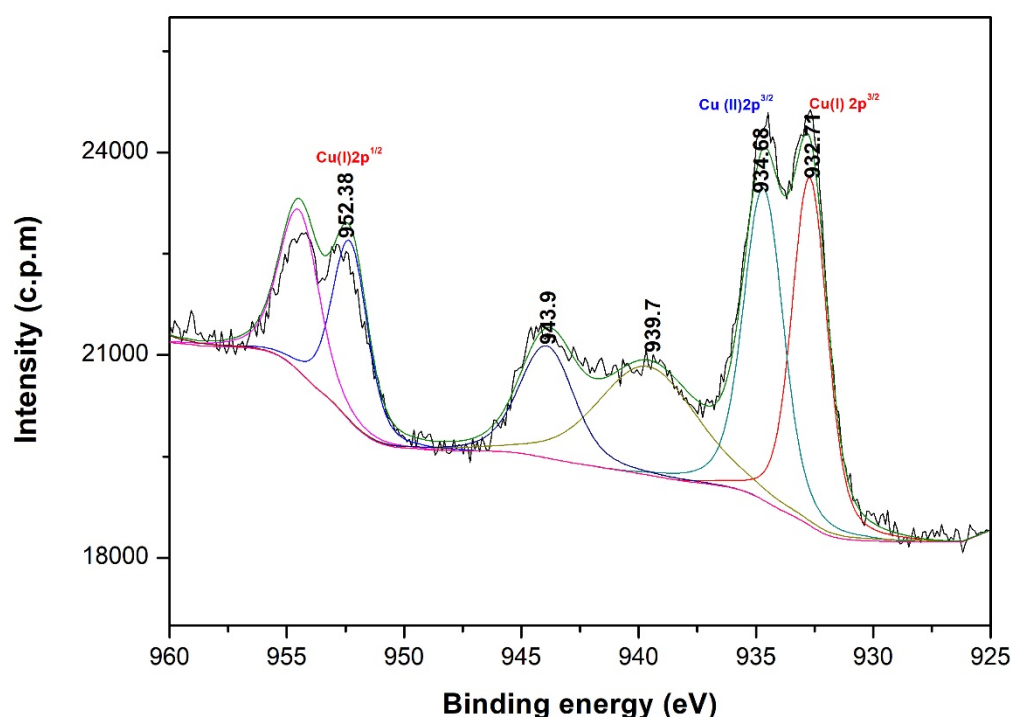

**Figure S10.** The XPS spectra of eosin-Y/Cu(OAc)<sub>2</sub> mixture

## 8. Mechanistic study of eosin-Y catalysed reaction

Eosin-Y solely catalyses reaction of **1a** with **2a** and desired product **3a** was isolated in irreproducible yield when the reaction was carried out in freshly distilled (dry) DCE solvent. (The yield of eosin-Y catalysed reaction was not reproduceable. Several times the reaction was carried out under similar reaction conditions, same batch of **1a** but failed to reproduced the yield.) To understand, how eosin-Y catalyses this reaction, a number of mechanistic experiments were carried out. Under reaction conditions (**1a**, 2 mol% eosin-Y, freshly dried DCE solvent, in air), imine **5** was isolated in irreproducible yield (~30% yield) (**Scheme S5a**). This fact demonstrates that imine **5** is the productive intermediate for eosin-Y catalysed reaction too. On the other hand, the reaction yielded a trace amount (in TLC) of imine **5** (**Scheme S5b**) in presence of radical scavenger 2,6-di-tert-butyl-4-methylphenol (BHT). This observation suggesting that this reaction may undergo a radical pathway. Reaction of **1a** with **2a** in presence of 2 mol% eosin-Y in DCE under argon atmosphere, resulted in <4% yield of imine **5** (**Scheme S5c**). This finding confirmed air is essential for good yield of the reaction.

Next, **1a** was stirred in freshly dry DCE in air for 8h, a trace of the imine **5** was observed in TLC. Next, the reaction was carried out in presence of 4 mol% of Con. HCl using freshly dried DCE in air for 8h, 24% of the imine **5** was isolated (**Scheme S5d**). This result implies for an acid catalysed reaction.<sup>6</sup> To further confirm this hypothesis, the same reaction was conducted using 20 mol% of NaOAc, the imine **5** was not detected (in TLC) even after 14 h (**Scheme S5e**). When **1a** and Na<sub>2</sub>EosinY were dissolved in freshly dried DCE and stirred under air for 8h, no trace of imine **5** (**Scheme S4f**) formation was observed (in TLC). As there are no acidic protons in Na<sub>2</sub>EosinY. The results of the control experiments (**Scheme S4d-f**) support in favour of an acid catalysed reaction.



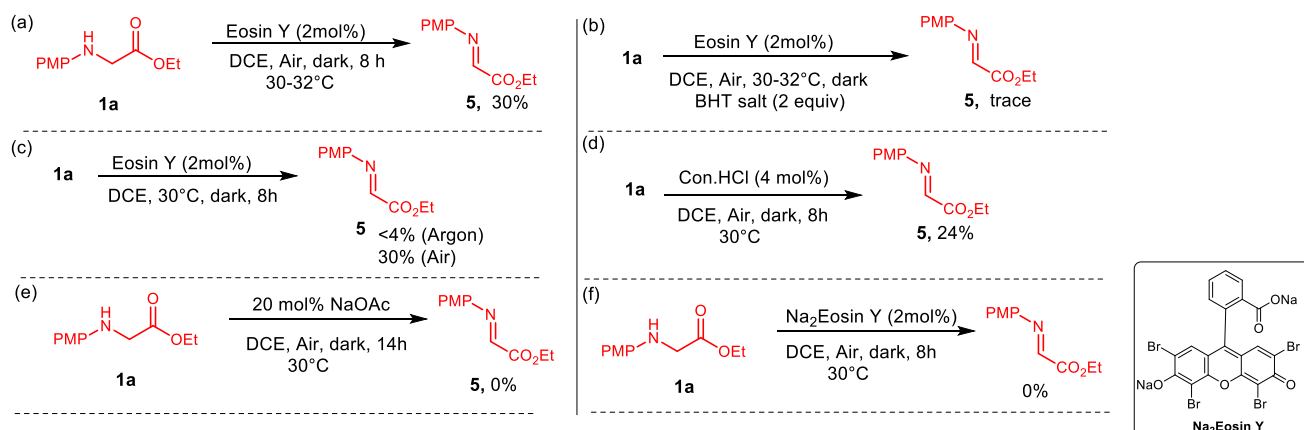

### Scheme S5: Control experiments

Moreover, when an aliquot of the reaction mixture (**1a**, 2 mol% eosin-Y, freshly dried DCE solvent, in air at room temperature) was subjected to high-resolution mass spectrometry, the hydroperoxide intermediate **IV** (Scheme S6a) was detected (Figure S11). In addition to that when the same reaction was carried out in presence of 5,5-dimethyl-1-pyrroline N-oxide (DMPO) as a radical scavenger, the peaks at  $m/z$  value 148.0758 and 322.1870 were detected in mass spectrometry (Figure S12) which are probably the decomposition adduct of DMPO-O<sub>2</sub><sup>-</sup> and DMPO-**1a** adduct respectively (Scheme S6b).

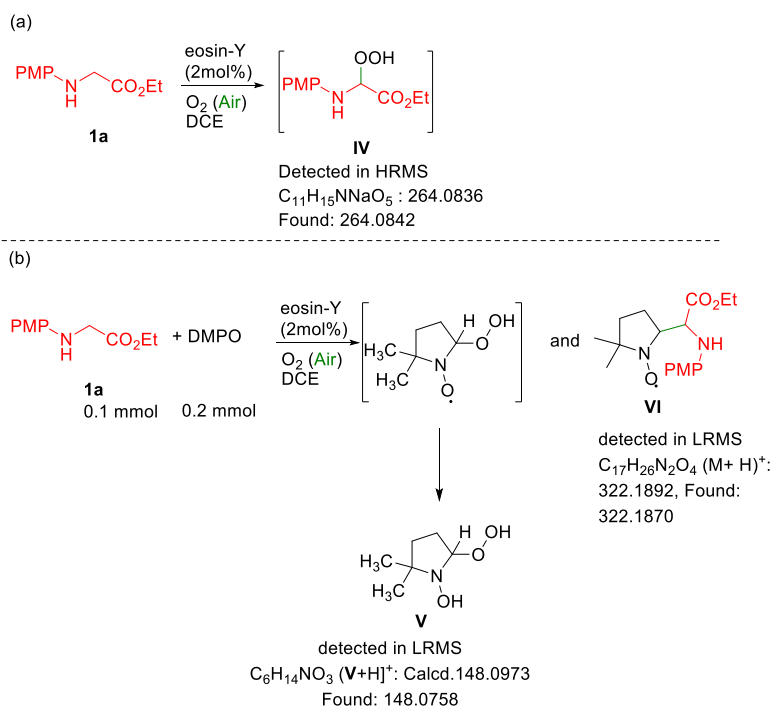

## Scheme S6: Mechanistic experiments

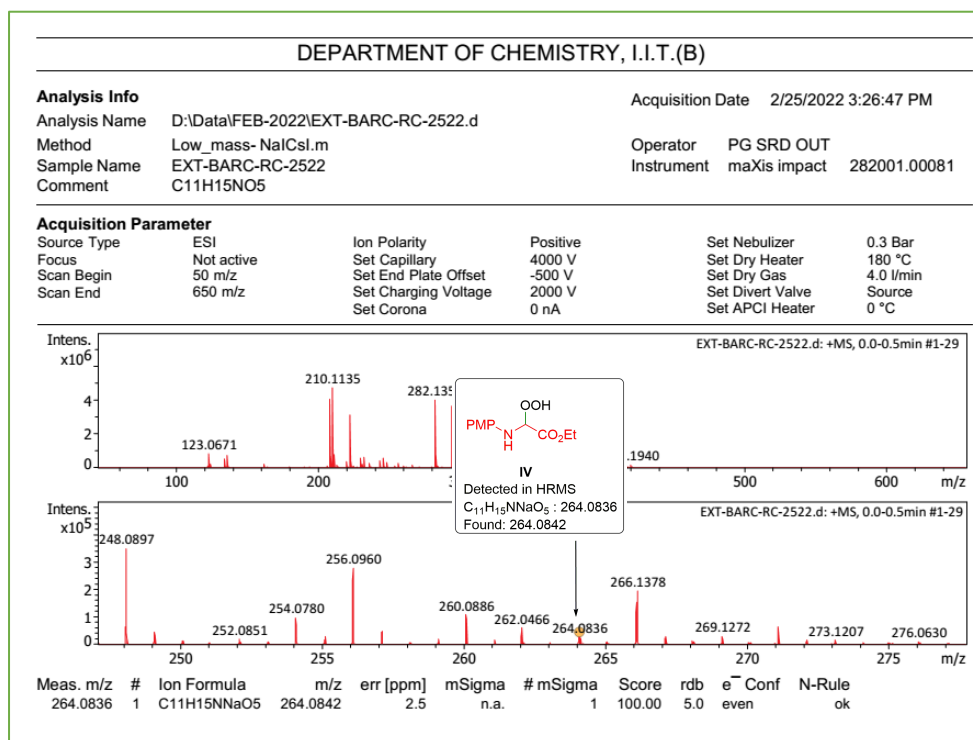

Figure S11. Detection of intermediate IV in HRMS

DEPARTMENT OF CHEMISTRY, I.I.T.(B)

**Analysis Info**

Analysis Name D:\Data\FEB-2022\EXT-BARC-RC-2525.d  
 Method Naformat\_pos\_50-600.m  
 Sample Name EXT-BARC-RC-2525  
 Comment C6H12NO3

Acquisition Date 2/25/2022 4:13:47 PM  
 Operator PG SRD OUT  
 Instrument maXis impact 282001.00081

**Acquisition Parameter**

|             |            |                      |          |                  |           |
|-------------|------------|----------------------|----------|------------------|-----------|
| Source Type | ESI        | Ion Polarity         | Positive | Set Nebulizer    | 0.3 Bar   |
| Focus       | Not active | Set Capillary        | 3700 V   | Set Dry Heater   | 180 °C    |
| Scan Begin  | 50 m/z     | Set End Plate Offset | -500 V   | Set Dry Gas      | 4.0 l/min |
| Scan End    | 600 m/z    | Set Charging Voltage | 2000 V   | Set Divert Valve | Source    |
|             |            | Set Corona           | 0 nA     | Set APCI Heater  | 0 °C      |

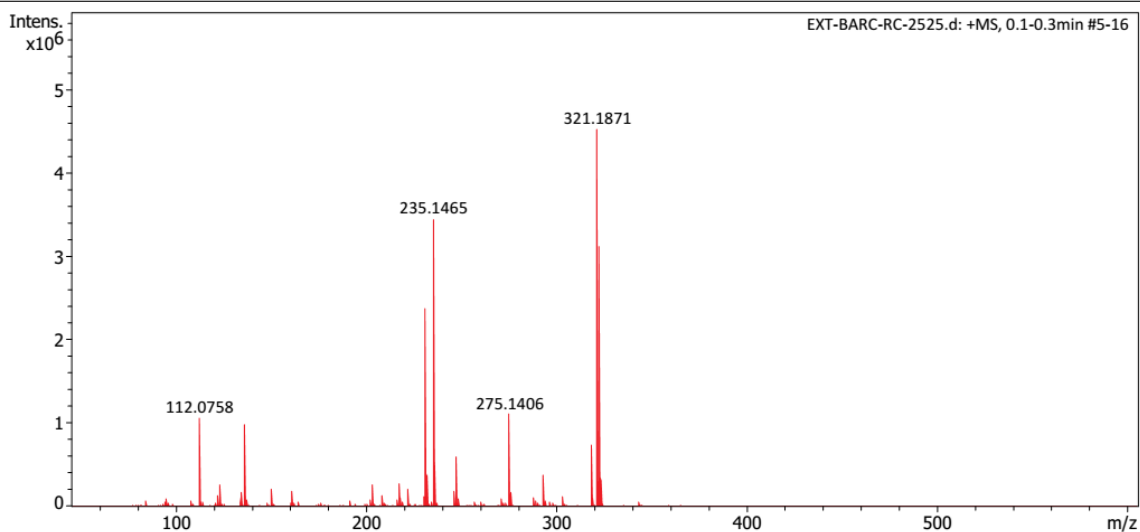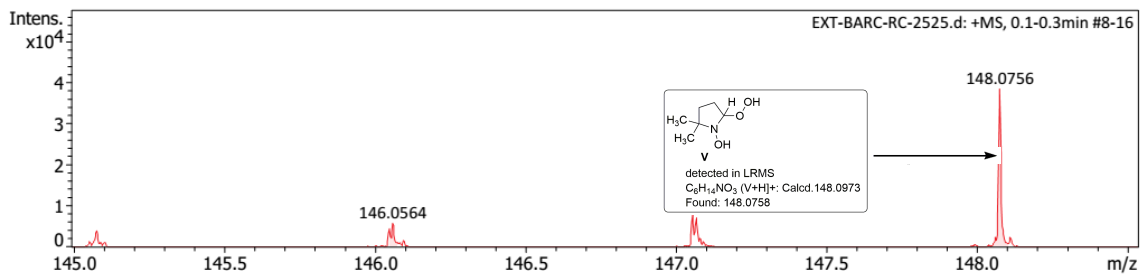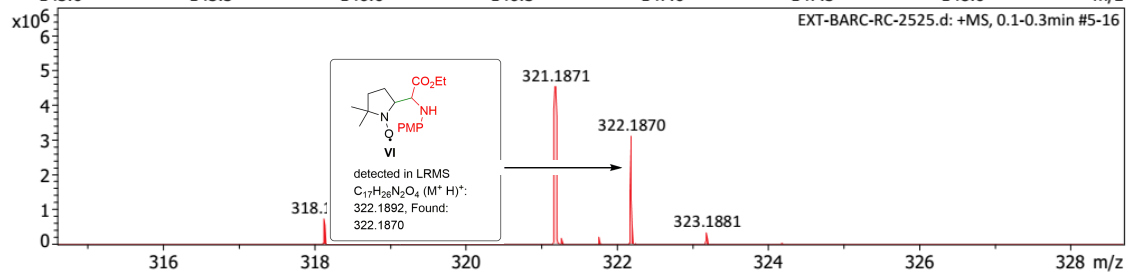

EXT-BARC-RC-2525.d

Bruker Compass DataAnalysis 5.1

printed: 2/25/2022 4:36:04 PM

by: PG SRD OUT

Page 1 of 1

**Figure S12.** Detection of intermediate V and VI in LRMS

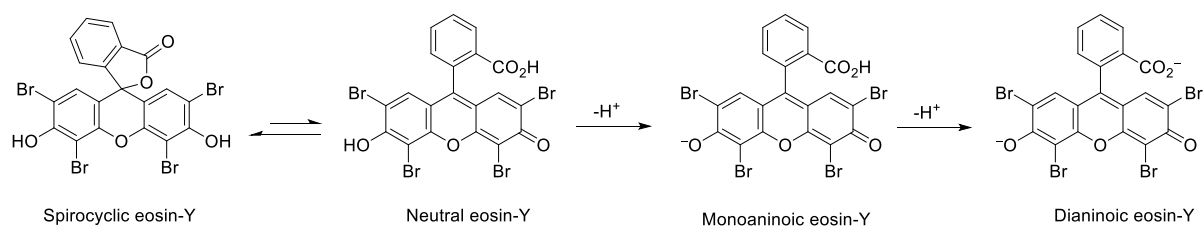

**Figure S13:** Different form of eosin-Y

Based on the above preliminary experimental findings, literature reports<sup>6</sup> and considering marked acid properties of eosin-Y due to its unique structural scaffold (**Figure S13**), a possible mechanistic pathway was proposed as described in **Scheme S7**. Auto-oxidation of glycine ester **1a** in presence of oxygen (air) lead to hydroperoxide intermediate **IV** which accepts a proton from eosin Y and undergoes a S<sub>N</sub>1 type reaction to form the intermediate **III**. Subsequently, release of proton from **III** leads to iminium intermediate **5**. Then, addition reaction of  $\beta$ -ketoacid **2a** to **5** followed by decarboxylation finally produce product **3a**. (Other mechanistic pathways cannot be ruled out at this stage.)

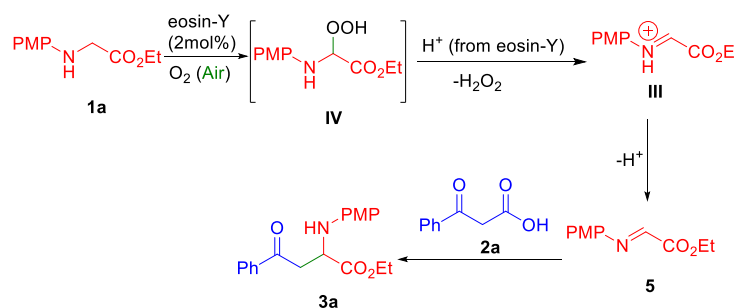

**Scheme S7:** Plausible reaction mechanism

## 9. The Preparation of Substrates

### *General procedure for the synthesis of glycine derivatives*<sup>7</sup>

In a 50 mL oven dried round bottom flask equipped with a magnetic stirring bar, *p*-methoxyaniline (20 mmole, 1 equiv), ethyl bromoacetate (20 mmole, 1 equiv) and anhydrous sodium acetate (20 mmol, 2 equiv) were taken and then 20 ml ethanol was added. The reaction

mixture was stirred in oil bath (90 °C) for 24h under N<sub>2</sub> atmosphere. After cooling, the solvent was evaporated and residue was subjected to column chromatography (230-400 mesh silica gel). The resulting product **1a** was crystalized and gave the product **1a** as off-white solid.

Following the general procedure, other glycine derivatives **1b-1d** were prepared.

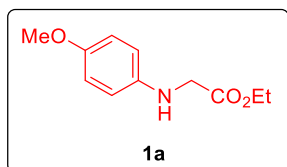

### Ethyl (4-methoxyphenyl)glycinate **1a**<sup>2</sup>

<sup>1</sup>H NMR (600MHz, CDCl<sub>3</sub>): δ 6.79 (d, *J* = 8.5 Hz, 2 H), 6.59 (d, *J* = 8.3 Hz, 2 H), 4.23 (q, *J* = 7.0Hz, 2 H), 3.86 (2 H), 3.74 (s, 3 H), 1.29 (t, *J* = 7.0 Hz, 3 H); <sup>13</sup>C{<sup>1</sup>H} NMR (201.2 MHz, CDCl<sub>3</sub>): δ 171.4, 152.6, 141.2, 114.9 (2 C), 114.4 (2 C), 61.2, 55.7, 46.8, 14.1. Spectral data is close agreement with literature.<sup>2</sup>

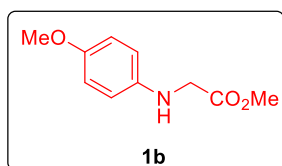

### Methyl (4-methoxyphenyl)glycinate **1b**<sup>2</sup>

<sup>1</sup>H NMR (600MHz, CDCl<sub>3</sub>): δ 6.79 (d, *J* = 9.0 Hz, 2 H), 6.59 (d, *J* = 7.9 Hz, 2 H), 3.88 (s, 2 H), 3.77 (s, 3 H), 3.74 (s, 3 H); <sup>13</sup>C{<sup>1</sup>H} NMR (201.2 MHz, CDCl<sub>3</sub>): δ 171.9, 152.7, 141.2, 114.9 (2 C), 114.4 (2 C), 55.7, 52.2, 46.7. Spectral data is close agreement with literature.<sup>2</sup>

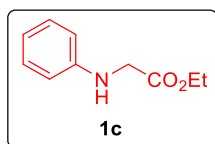

### Ethyl phenylglycinate **1c**

<sup>1</sup>H NMR (600MHz, CDCl<sub>3</sub>): δ 7.20 (t, *J* = 7.5 Hz, 2 H), 6.76 (t, *J* = 7.1 Hz, 1 H), 6.62 (t, *J* = 7.8 Hz, 2 H), 4.25 (q, *J* = 7.0 Hz, 2 H), 3.90 (2 H), 1.30 (t, *J* = 7.0 Hz, 3 H); <sup>13</sup>C{<sup>1</sup>H} NMR (201.2 MHz, CDCl<sub>3</sub>): δ 171.1, 147.2, 129.3 (2 C), 118.1, 113.0 (2 C), 61.3, 45.8, 14.2.

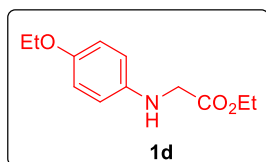

Ethyl (4-ethoxyphenyl)glycinate **1d**<sup>2</sup>

<sup>1</sup>H NMR (600MHz, CDCl<sub>3</sub>): δ 6.78 (d, *J* = 8.5 Hz, 2 H), 6.57 (d, *J* = 8.4 Hz, 2 H), 4.24-4.21 (m, 2 H), 3.97-3.94 (m, 2 H), 3.85 (s, 2 H), 1.38-1.35 (m, 3 H), 1.29-1.27 (m, 3 H). <sup>13</sup>C{<sup>1</sup>H} NMR (201.2 MHz, CDCl<sub>3</sub>): δ 171.4, 151.9, 141.2, 115.7 (2 C), 114.4 (2 C), 64.0, 61.2, 46.8, 14.9, 14.2. Spectral data is close agreement with literature.<sup>2</sup>

### General Procedure for Preparation of β-ketoacids

The β-ketoacids were prepared following the literature procedure.<sup>8</sup>

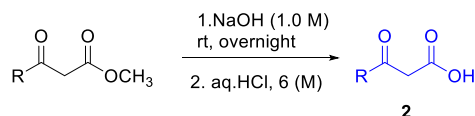

In a 50 mL round bottom flask, β-ketoester<sup>10</sup> (10 mmol, 1. equiv) was taken. Aqueous NaOH (1 M, 12 mL) was added slowly and then the reaction mixture was stirred overnight at room temperature. The reaction mixture was extracted with Et<sub>2</sub>O (2× 10 mL). The aqueous phase was then cooled to 0 °C and acidified to pH 1-2 with aq.HCl (6 M), precipitate was formed. EtOAc was added to the resulting suspension. The organic layers were separated and the aqueous layer was extracted with EtOAc. The combined organic layers were dried over anhydrous sodium sulphate and the solvent was removed under reduced pressure (bath set to 25 °C). The resulting solid was washed with petroleum ether (2-3 times), dried in vacuum and used without further purification.

(It should be noted that instead of DCM, EtOAc was used as extracting solvent in the present study)

## 10. General procedure for the synthesis of product 3a-3p and 4a-4j in the dark

To an oven dried 5mL round bottom flask (wrapped in aluminium foil) with a magnetic stirring bar were added glycinate ester **1** (0.4 mmol, 1 equiv) and eosin Y (5.2 mg, 0.008 mmol, 2 mol%). Then 2 mL of dry DCE was added via syringe followed by addition of Cu(OAc)<sub>2</sub> (3.66 mg, 0.02 mmol, 5 mol%). Two small needles were inserted through the rubber septum to maintain the oxygen (air) level inside the flask. The reaction mixture was stirred (for 8h) under air atmosphere at room temperature (30-32°C). Once the glycinate ester **1** was consumed (monitored by TLC-run the plate three times, 10% EtOAc/ petroleum ether), then β-ketoacid (0.6 mmol or 0.8 mmol) or indole (0.44 mmol or 0.48 mmol) or naphthol (0.44 mmol) or pyrrole (0.44 mmol) was added in one shot (in case of liquid, the nucleophile was *dissolved in 0.5 mL of dry DEC and then added slowly to the reaction mixture*). The reaction mixture was further stirred for 2-4h (for β-ketoacid) or 4-5h (indole derivatives, naphthol and pyrrole) . After completion of the reaction, the reaction mixture was purified by column chromatography on silica gel (petroleum ether/EtOAc as the eluent) to afford product **3** or **4**.

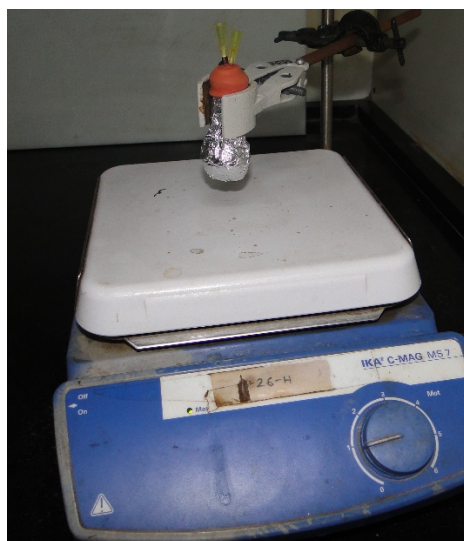

**Figure S14.** Reaction set-up for the dark reaction

## 11. Characterization data

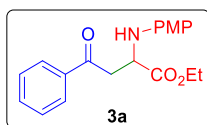

### *Ethyl 2-((4-methoxyphenyl)amino)-4-oxo-4-phenylbutanoate (3a)*

Purified by column chromatography on silica gel (20% EtOAc/ petroleum ether –25% EtOAc/ petroleum ether). The above titled compound was isolated as slightly yellow liquid which solidified in refrigerator. Yield =103 mg (78%); Mp: 65.5-66.5°C; **<sup>1</sup>H NMR (600MHz, CDCl<sub>3</sub>):** δ 7.93 (d, *J* = 7.8 Hz, 2 H), 7.57 (t, *J* = 7.8 Hz, 1 H), 7.46 (t, *J* = 7.8 Hz, 2 H), 6.77 (d, *J* = 8.4 Hz, 2 H), 6.68 (d, *J* = 9.0 Hz, 2 H), 4.53 (t, *J* = 5.4 Hz, 1 H), 4.18 (q, *J* = 7.2 Hz, 2 H), 3.73 (s, 3 H), 3.52 (d, *J* = 5.4 Hz, 2 H), 1.20 (t, *J* = 6.9 Hz, 3 H); **<sup>13</sup>C{<sup>1</sup>H} NMR (201.2 MHz, CDCl<sub>3</sub>):** δ 197.4, 173.2, 153.0, 140.6, 136.5, 133.5, 128.7 (2 C), 128.1 (2 C), 115.7 (2 C), 114.9 (2 C), 61.5, 55.7, 54.5, 41.1, 14.1; **HRMS (ESI)** calcd for C<sub>19</sub>H<sub>22</sub>NO<sub>4</sub> [M + H]<sup>+</sup>: 328.1543, found: 328.1555. Spectral data is close agreement with literature.<sup>9</sup>

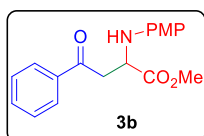

### *Methyl 2-((4-methoxyphenyl)amino)-4-oxo-4-phenylbutanoate (3b)*

Purified by column chromatography on silica gel (20% EtOAc/ petroleum ether –25% EtOAc/ petroleum ether). The above titled compound was isolated slightly yellow liquid which solidified in refrigerator. Yield = 95 mg (~75%); **<sup>1</sup>H NMR (600MHz, CDCl<sub>3</sub>):** δ 7.93 (d, *J* = 7.6 Hz, 2 H), 7.57 (t, *J* = 7.2 Hz, 1 H), 7.46 (t, *J* = 7.7 Hz, 2 H), 6.77 (d, *J* = 8.5 Hz, 2 H), 6.67 (d, *J* = 8.6 Hz, 2 H), 4.55 (t, *J* = 5.1 Hz, 1 H), 3.73 (s, 3 H), 3.72 (s, 3 H), 3.53 (d, *J* = 5.4 Hz, 2 H); **<sup>13</sup>C{<sup>1</sup>H} NMR (201.2 MHz, CDCl<sub>3</sub>):** δ 197.4, 173.7, 153.0, 140.5, 136.4, 133.6, 128.7



(2 C), 128.2 (2 C), 115.7 (2 C), 114.9 (2 C), 55.7, 54.3, 52.5, 41.1. Spectral data is close agreement with literature.<sup>10</sup>

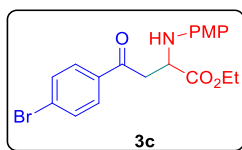

***Ethyl 4-(4-bromophenyl)-2-((4-methoxyphenyl)amino)-4-oxobutanoate (3c)***

Purified by column chromatography on silica gel (20% EtOAc/ petroleum ether –25% EtOAc/ petroleum ether). The above titled compound was isolated as slightly yellow solid. Yield =125 mg (77%); Mp:67-68 °C; **<sup>1</sup>H NMR (600MHz, CDCl<sub>3</sub>):**  $\delta$  7.79 (d,  $J$  = 7.9 Hz, 2 H), 7.59 (d,  $J$  = 8.2 Hz, 2 H), 6.76 (d,  $J$  = 8.4 Hz, 2 H), 6.68 (d,  $J$  = 8.4 Hz, 2 H), 4.52 (t,  $J$  = 5.3Hz, 1 H), 4.17 (q,  $J$  = 7.1 Hz, 2 H), 3.73 (s, 3 H), 3.47 (d,  $J$  = 5.3 Hz, 2 H), 1.20 (t,  $J$  = 7.0 Hz, 3 H), **<sup>13</sup>C{<sup>1</sup>H} NMR (201.2 MHz, CDCl<sub>3</sub>):**  $\delta$  196.4, 173.0, 153.1, 140.3, 135.2, 132.0 (2 C), 129.6 (2 C), 128.7, 115.9 (2 C), 114.8 (2 C), 61.5, 55.6, 54.5, 41.0, 14.1; **ATR:** 3339, 2980, 1711, 1680, 1509, 1235, 1208, 1172, 817 cm<sup>-1</sup>; **HRMS (ESI)** calcd for C<sub>19</sub>H<sub>21</sub>BrNO<sub>4</sub> [M + H]<sup>+</sup>: 406.0648, found: 406.0647.

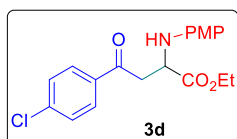

***Ethyl 4-(4-chlorophenyl)-2-((4-methoxyphenyl)amino)-4-oxobutanoate (3d)***

Purified by column chromatography on silica gel (20% EtOAc/ petroleum ether –25% EtOAc/ petroleum ether). The above titled compound was isolated as slightly yellow liquid which solidified in refrigerator. Yield = 112 mg (>77%); Mp:76.5-77.5 °C; **<sup>1</sup>H NMR (600MHz, CDCl<sub>3</sub>):**  $\delta$  7.86 (d,  $J$  = 8.2 Hz, 2 H), 7.43 (d,  $J$  = 8.1 Hz, 2 H), 6.77 (d,  $J$  = 8.6 Hz, 2 H), 6.67 (d,  $J$  = 8.6 Hz, 2 H), 4.52 (t,  $J$  = 5.2 Hz, 1 H), 4.17 (q,  $J$  = 7.1 Hz, 2 H), 3.73 (s, 3 H), 3.48 (d,

$J = 5.3$  Hz, 2 H), 1.20 (t,  $J = 7.1$  Hz, 3 H);  **$^{13}\text{C}\{^1\text{H}\}$  NMR (201.2 MHz,  $\text{CDCl}_3$ ):**  $\delta$  196.2, 173.1, 153.1, 140.5, 140.0, 134.8, 129.6 (2 C), 129.0 (2 C), 115.8 (2 C), 114.9 (2 C), 61.5, 55.7, 55.5, 41.0, 14.1; **ATR:** 3339, 2977, 1708, 1685, 1510, 1236, 1208, 1175, 822  $\text{cm}^{-1}$ ; **HRMS (ESI)** calcd for  $\text{C}_{19}\text{H}_{21}\text{ClNO}_4$   $[\text{M} + \text{H}]^+$ : 362.1153, found: 362.1154.

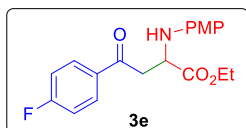

### *Ethyl 4-(4-fluorophenyl)-2-((4-methoxyphenyl)amino)-4-oxobutanoate (3e)*

Purified by column chromatography on silica gel (20% EtOAc/ petroleum ether –25% EtOAc/ petroleum ether). The above titled compound was isolated as yellow solid. Yield = 102 mg (74%); Mp:75.0 -75.5 °C;  **$^1\text{H}$  NMR (600MHz,  $\text{CDCl}_3$ ):**  $\delta$  7.97-7.94 (m, 2 H), 7.12 (t,  $J = 8.3$  Hz, 2 H), 6.76 (d,  $J = 8.6$  Hz, 2 H), 6.67 (d,  $J = 8.6$  Hz, 2 H), 4.51 (t,  $J = 5.3$  Hz, 1 H), 4.17 (q,  $J = 7.1$  Hz, 2 H), 3.73 (s, 3 H), 3.49 (d,  $J = 5.4$  Hz, 2 H), 1.20 (t,  $J = 7.1$  Hz, 3 H);  **$^{13}\text{C}\{^1\text{H}\}$  NMR (201.2 MHz,  $\text{CDCl}_3$ ):**  $\delta$  195.8, 173.1, 165.97 (d,  $J_{\text{C-F}} = 253.9$  Hz), 153.0, 140.5, 133.0, 130.8 (d,  $J_{\text{C-F}} = 8.7$  Hz), 115.9, 115.8 (4 C), 114.9 (2 C), 61.5, 55.7, 54.5, 41.0, 14.1; **ATR:** 3328, 2983, 1729, 1673, 1593, 1509, 1236, 1237, 1178, 821  $\text{cm}^{-1}$ ; **HRMS (ESI)** calcd for  $\text{C}_{19}\text{H}_{21}\text{FNO}_4$   $[\text{M} + \text{H}]^+$ : 346.1449, found: 346.1441.

### **Synthesis of 3e in 1 mmol scale:**

To an oven dried 25mL round bottom flask (wrapped in aluminium foil) with a magnetic stirring bar were added glycinate ester **1a** (209 mg, 1 mmol) and eosin Y (13 mg, 0.02 mmol, 2 mol%). Then 5 mL of dry DCE was added via syringe followed by addition of  $\text{Cu}(\text{OAc})_2$  (9.0 mg, 0.05 mmol, 5 mol%). The reaction mixture was stirred (for 10h) under air atmosphere at room temperature (32-34 °C). Once the glycinate ester **1a** was consumed (monitored by TLC), then  $\beta$ -ketoacid **1e** (273 mg, 1.5 mmol) was added in one portion. The reaction mixture was further stirred for 2h. After completion of the reaction, the reaction mixture was

concentrated to one-third of the total volume. The crude residue was purified by column chromatography on silica gel (petroleum ether/EtOAc as the eluent) to afford product **3e** as light-yellow solid (252 mg, 73%).

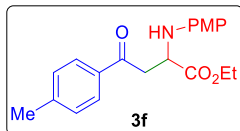

***Ethyl 4-((4-methoxyphenyl)amino)-4-oxo-4-(p-tolyl)butanoate (3f)***

Purified by column chromatography on silica gel (20% EtOAc/ petroleum ether –25% EtOAc/ petroleum ether). The above titled compound was isolated as yellow solid. Yield = 103 mg (75%); Mp: 81-82°C; **<sup>1</sup>H NMR (600MHz, CDCl<sub>3</sub>):**  $\delta$  7.83 (d,  $J$  = 7.9 Hz, 2 H), 7.23 (d,  $J$  = 8.0 Hz, 2 H), 6.76 (d,  $J$  = 8.6 Hz, 2 H), 6.68 (d,  $J$  = 8.6 Hz, 2 H), 4.51 (t,  $J$  = 5.5 Hz, 1 H), 4.16 (q,  $J$  = 7.2 Hz, 2 H), 3.73 (s, 3 H), 3.50 (d,  $J$  = 5.3 Hz, 2 H), 2.40 (s, 3 H), 1.19 (t,  $J$  = 7.1 Hz, 3 H); **<sup>13</sup>C{<sup>1</sup>H} NMR (201.2 MHz, CDCl<sub>3</sub>):**  $\delta$  197.4, 173.0, 144.2, 136.5, 133.5, 129.8 (2 C), 128.7 (2 C), 128.1 (2 C), 127.9, 114.1 (2 C), 61.5, 53.6, 41.0 (2 C), 20.4, 14.1; **ATR :** 3347, 2987, 2832, 1728, 1699, 1512, 1275, 1235, 1174, 1029, 813 cm<sup>-1</sup>; **HRMS (ESI)** calcd for C<sub>20</sub>H<sub>24</sub>NO<sub>4</sub> [M + H]<sup>+</sup>: 342.1699, found: 342.1700.

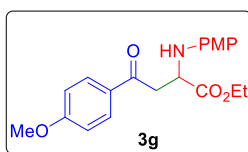

***Ethyl 4-(4-methoxyphenyl)-2-((4-methoxyphenyl)amino)-4-oxobutanoate (3g)***

Purified by column chromatography on silica gel (20% EtOAc/ petroleum ether –25% EtOAc/ petroleum ether). The above titled compound was isolated as colourless solid. Yield = 109 mg (76%); Mp:73-74°C (petroleum ether/EtOAc); **<sup>1</sup>H NMR (600MHz, CDCl<sub>3</sub>):**  $\delta$  7.92-7.89 (m, 2 H), 6.93-6.91 (m, 2 H), 6.77-6.74 (m, 2 H), 6.68-6.67 (m, 2 H), 4.50 (t,  $J$  = 5.5 Hz, 1 H), 4.16 (q,  $J$  = 7.1 Hz, 2 H), 3.85 (s, 3 H), 3.72 (s, 3 H), 3.46 (d,  $J$  = 5.6 Hz, 2 H), 1.18 (t,  $J$  = 7.1 Hz,

3 H); **<sup>13</sup>C{<sup>1</sup>H}** NMR (201.2 MHz, CDCl<sub>3</sub>): δ 195.8, 173.3, 163.8, 153.0, 140.7, 130.5 (2 C), 129.6, 115.7 (2 C), 114.8 (2 C), 113.8 (2 C), 61.4, 55.7, 55.5, 54.6, 40.7, 14.1; **ATR**: 3337, 2958, 1728, 1665, 1512, 1253, 1169, 1030, 820 cm<sup>-1</sup>; **HRMS (ESI)** calcd for C<sub>20</sub>H<sub>24</sub>NO<sub>5</sub> [M + H]<sup>+</sup>: 358.1648, found: 358.1647.

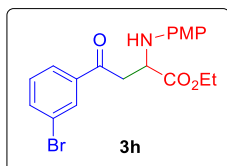

### ***Ethyl 4-(3-bromophenyl)-2-((4-methoxyphenyl)amino)-4-oxobutanoate (3h)***

Purified by column chromatography on silica gel (20% EtOAc/ petroleum ether –25% EtOAc/ petroleum ether). The above titled compound was isolated as light brown solid. Yield = 114 mg (70%); Mp:93-94°C; **<sup>1</sup>H NMR (600MHz, CDCl<sub>3</sub>)**: δ 8.04 (t, *J* = 1.7 Hz, 1 H), 7.84 (ddd, *J* = 7.8, 1.7, 1.0 Hz, 1 H), 7.68 (ddd, *J* = 8.0, 2.0, 1.0 Hz, 1 H), 7.33 (t, *J* = 7.8 Hz, 1 H), 6.78-6.75 (m, 2 H), 6.71-6.68 (m, 2 H), 4.52 (t, *J* = 5.5 Hz, 1 H), 4.17 (q, *J* = 7.1 Hz, 2 H), 3.73 (s, 3 H), 3.49 (d, *J* = 5.5 Hz, 2 H), 1.20 (t, *J* = 7.3 Hz, 3 H); **<sup>13</sup>C{<sup>1</sup>H}** NMR (201.2 MHz, CDCl<sub>3</sub>): δ 196.1, 172.9, 153.1, 140.3, 138.2, 136.3, 131.2, 130.3, 126.6, 123.0, 115.8 (2 C), 114.9 (2 C), 61.5, 55.7, 54.5, 40.1, 14.1; **HRMS (ESI)** calcd for C<sub>19</sub>H<sub>21</sub><sup>79</sup>BrNO<sub>4</sub> [M + H]<sup>+</sup>: 406.0648, found: 406.0648, C<sub>19</sub>H<sub>21</sub><sup>81</sup>BrNO<sub>4</sub> [M + H]<sup>+</sup>: found: 406.0634.

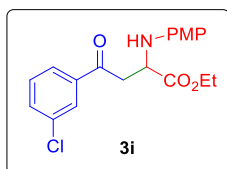

### ***Ethyl 4-(3-chlorophenyl)-2-((4-methoxyphenyl)amino)-4-oxobutanoate (3i)***

Purified by column chromatography on silica gel (20% EtOAc/ petroleum ether –25% EtOAc/ petroleum ether). The above titled compound was isolated as yellow solid. Yield = 119 mg (82%); Mp:74.5-75.5°C; **<sup>1</sup>H NMR (600MHz, CDCl<sub>3</sub>)**: δ 7.90 (s, 1 H), 7.80 (d, *J* = 7.7 Hz, 1

H), 7.54 (d,  $J = 7.8$  Hz, 1 H), 7.40 (t,  $J = 7.7$  Hz, 1 H), 6.77 (d,  $J = 8.5$  Hz, 2 H), 6.68 (d,  $J = 8.5$  Hz, 2 H), 4.52 (t,  $J = 5.0$  Hz, 1 H), 4.17 (q,  $J = 7.0$  Hz, 2 H), 3.73 (s, 3 H), 3.49 (d,  $J = 5.2$  Hz, 2 H), 1.20 (t,  $J = 7.3$  Hz, 3 H);  **$^{13}\text{C}\{^1\text{H}\}$  NMR (201.2 MHz,  $\text{CDCl}_3$ ):**  $\delta$  196.2, 173.0, 153.2, 140.4, 138.0, 135.1, 133.4, 130.0, 128.3, 126.2, 115.9 (2 C), 114.9 (2 C), 61.6, 55.7, 55.5, 41.2, 14.1; **ATR :** 3370, 3017, 2907, 1730, 1688, 1512, 1212, 1036, 748  $\text{cm}^{-1}$ ; **HRMS (ESI)** calcd for  $\text{C}_{19}\text{H}_{21}\text{ClNO}_4$   $[\text{M} + \text{H}]^+$ : 362.1153, found: 362.1157.

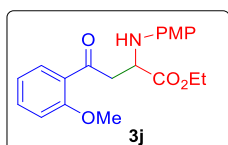

***Ethyl 4-(2-methoxyphenyl)-2-((4-methoxyphenyl)amino)-4-oxobutanoate (3j)***

Purified by column chromatography on silica gel (20% EtOAc/ petroleum ether –25% EtOAc/ petroleum ether). The above titled compound was isolated as light-yellow liquid. Yield = 113mg (79%);  **$^1\text{H}$  NMR (600MHz,  $\text{CDCl}_3$ ):**  $\delta$  7.73 (d,  $J = 7.8$ , 1 H), 7.47 (t,  $J = 7.6$  Hz, 1 H), 6.99 (t,  $J = 7.5$  Hz, 1 H), 6.96 (d,  $J = 8.3$ , 1.0 Hz, 1 H), 6.76 (d,  $J = 8.7$  Hz, 2 H), 6.65 (d,  $J = 8.6$  Hz, 2 H), 4.47 (t,  $J = 5.8$  Hz, 1 H), 4.16 (q,  $J = 7.0$  Hz, 2 H), 3.89 (s, 3 H), 3.73 (s, 3 H), 3.54 (dd,  $J = 17.4$ , 5.3 Hz, 1 H), 3.50 (dd,  $J = 17.2$ , 5.7 Hz, 1 H), 1.20 (t,  $J = 7.3$  Hz, 3 H);  **$^{13}\text{C}\{^1\text{H}\}$  NMR (201.2 MHz,  $\text{CDCl}_3$ ):**  $\delta$  198.9, 173.5, 158.8, 152.8, 140.8, 134.1, 130.6, 127.3, 120.7, 115.6 (2 C), 114.8 (2 C), 111.5, 61.2, 55.6, 55.4, 54.7, 46.4, 14.1; **ATR :** 3370, 2987, 2940, 1731, 1668, 1596, 1511, 1236, 1022, 821, 758  $\text{cm}^{-1}$ ; **HRMS (ESI)** calcd for  $\text{C}_{20}\text{H}_{24}\text{NO}_5$   $[\text{M} + \text{H}]^+$ : 358.1648, found: 358.1649.

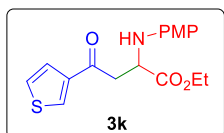

***Ethyl 2-((4-methoxyphenyl)amino)-4-oxo-4-(thiophen-3-yl)butanoate (3k)***

Purified by column chromatography on silica gel (20% EtOAc/ petroleum ether –25% EtOAc/ petroleum ether). The above titled compound was isolated as yellow solid. Yield = 100 mg (75%); Mp: 51-52°C;  $^1\text{H NMR}$  (600MHz,  $\text{CDCl}_3$ ):  $\delta$  8.03 (dd,  $J = 2.9, 1.4$  Hz, 1 H), 7.52 (dd,  $J = 5.1, 1.3$  Hz, 1 H), 7.30 (dd,  $J = 5.0, 2.9$  Hz, 1 H), 6.77-6.74 (m, 2 H), 6.68-6.66 (m, 2 H), 4.50 (t,  $J = 5.5$  Hz, 1 H), 4.16 (q,  $J = 7.1$  Hz, 2 H), 3.72 (s, 3 H), 3.41 (d,  $J = 5.7$  Hz, 2 H), 1.19 (t,  $J = 7.1$  Hz, 3 H);  $^{13}\text{C}\{^1\text{H}\}$  NMR (201.2 MHz,  $\text{CDCl}_3$ ):  $\delta$  191.5, 173.1, 153.0, 141.9, 140.6, 132.6, 126.8, 126.6, 115.7 (2 C), 114.9 (2 C), 61.5, 55.7, 54.5, 42.2, 14.1; ATR: 3349, 2985, 2833, 1738, 1663, 1508, 1168, 1038, 823, 793  $\text{cm}^{-1}$ ; HRMS (ESI) calcd for  $\text{C}_{17}\text{H}_{20}\text{NO}_4\text{S} [\text{M} + \text{H}]^+$ : 334.1107, found: 334.1108.

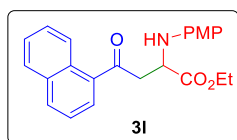

***Ethyl 2-((4-methoxyphenyl)amino)-4-(naphthalen-1-yl)-4-oxobutanoate (3l)***

Purified by column chromatography on silica gel (20% EtOAc/ petroleum ether –25% EtOAc/ petroleum ether). The above titled compound was isolated as yellow liquid. Yield = 118mg (78%);  $^1\text{H NMR}$  (600MHz,  $\text{CDCl}_3$ ):  $\delta$  8.60 (dd,  $J = 8.8, 0.9$  Hz, 1 H), 7.98 (d,  $J = 8.8$  Hz, 1 H), 7.85 (td,  $J = 7.9, 1.00$  Hz, 2 H), 7.57 (ddd,  $J = 8.3, 6.8, 1.4$  Hz, 1 H), 7.52 (ddd,  $J = 8.1, 6.8, 1.3$  Hz, 1 H), 7.49-7.46 (m, 1 H), 6.79-6.76 (m, 2 H), 6.72-6.70 (m, 2 H), 4.59 (t,  $J = 5.6$  Hz, 1 H), 4.19 (q,  $J = 7.1$  Hz, 2 H), 3.73 (s, 3 H), 3.60 (d,  $J = 5.6$  Hz, 2 H), 1.20 (t,  $J = 7.1$  Hz, 3 H);  $^{13}\text{C}\{^1\text{H}\}$  NMR (201.2 MHz,  $\text{CDCl}_3$ ):  $\delta$  201.3, 173.3, 153.1, 140.6, 135.2, 133.9, 133.1, 130.1, 128.4, 128.1, 127.9, 126.5, 125.7, 124.3, 115.8 (2 C), 114.8 (2 C), 61.5, 55.6, 55.0, 44.4, 14.1; HRMS (ESI) calcd for  $\text{C}_{23}\text{H}_{24}\text{NO}_4 [\text{M} + \text{H}]^+$ : 378.1699, found: 378.1700.

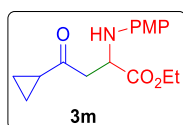

***Ethyl 4-cyclopropyl-2-((4-methoxyphenyl)amino)-4-oxobutanoate (3m)***

Purified by column chromatography on silica gel (20% EtOAc/ petroleum ether). The above titled compound was isolated as yellow liquid. Yield = 90 mg (77%); **<sup>1</sup>H NMR (600MHz, CDCl<sub>3</sub>)**: δ 6.76 (d, *J* = 8.5Hz, 2 H), 6.64 (d, *J* = 8.5Hz, 2 H), 4.35 (t, *J* = 5.6Hz, 1 H), 4.20-4.12 (m, 2 H), 3.73 (s, 3 H), 3.13 (d, *J* = 5.5 Hz, 2 H), 1.94-1.90 (m, 1 H), 1.22 (t, *J* = 7.1 Hz, 3 H), 1.08-1.03 (m, 2 H), 0.91-0.87 (m, 2 H); **<sup>13</sup>C{<sup>1</sup>H} NMR (201.2 MHz, CDCl<sub>3</sub>)**: δ 207.8, 173.0, 152.9, 140.6, 115.7 (2 C), 114.8 (2 C), 61.3, 55.6, 54.2, 45.4, 20.9, 14.0, 11.1, 11.0; **ATR**: 3402, 2982, 2833, 1726, 1606, 1510, 1234, 1033, 820, 742 cm<sup>-1</sup>; **HRMS (ESI)** calcd for C<sub>16</sub>H<sub>22</sub>NO<sub>4</sub> [M + H]<sup>+</sup>: 292.1543, found: 292.1548.

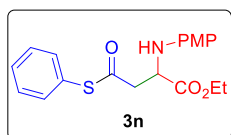

***Ethyl 2-((4-methoxyphenyl)amino)-4-oxo-4-(phenylthio)butanoate (3n)***

Purified by column chromatography on silica gel (20% EtOAc/ petroleum ether). The above titled compound was isolated as yellow liquid. Yield = 61mg (43%); **<sup>1</sup>H NMR (600MHz, CDCl<sub>3</sub>)**: δ 7.41-7.40 (m, 5 H), 6.77 (d, *J* = 8.6 Hz, 2 H), 6.65 (d, *J* = 8.7 Hz, 2 H), 4.42 (t, *J* = 5.9 Hz, 1 H), 4.24-4.16 (m, 2 H), 3.74 (s, 3 H), 3.15 (d, *J* = 5.7 Hz, 2 H), 1.26 (t, *J* = 6.9 Hz, 3H); **<sup>13</sup>C{<sup>1</sup>H} NMR (201.2 MHz, CDCl<sub>3</sub>)**: δ 194.7, 172.2, 153.2, 140.1, 134.4 (2 C), 129.6, 129.3 (2 C), 127.1, 115.8 (2 C), 114.9 (2 C), 61.7, 55.7, 55.2, 45.7, 14.1; **ATR**: 3368, 2981, 2832, 1733, 1700, 1511, 1236, 1180, 1033, 854, 820 cm<sup>-1</sup>; **HRMS (ESI)** calcd for C<sub>19</sub>H<sub>22</sub>NO<sub>4</sub>S [M + H]<sup>+</sup>: 360.1264, found: 360.1267.

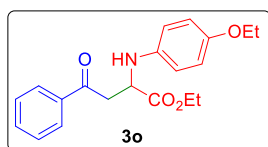

***Ethyl 2-((4-ethoxyphenyl)amino)-4-oxo-4-phenylbutanoate (3o)***

Purified by column chromatography on silica gel (20% EtOAc/ petroleum ether –25% EtOAc/ petroleum ether). The above titled compound was isolated as yellow solid. Yield = 110 mg (>80%); Mp: 89-90°C; <sup>1</sup>H NMR (600MHz, CDCl<sub>3</sub>): δ 7.93 (d, *J* = 7.9 Hz, 2 H), 7.57 (t, *J* = 7.3 Hz, 1 H), 7.46 (t, *J* = 7.3 Hz, 2 H), 6.76 (d, *J* = 8.6 Hz, 2 H), 6.68 (d, *J* = 8.6 Hz, 2 H), 4.53 (t, *J* = 5.4Hz, 1 H), 4.16 (q, *J* = 7.2 Hz, 2 H), 3.94 (q, *J* = 7.0 Hz, 2 H), 3.52 (d, *J* = 5.2 Hz, 2 H), 1.36 (t, *J* = 7.0 Hz, 3 H), 1.19 (t, *J* = 7.0 Hz, 3 H); <sup>13</sup>C{<sup>1</sup>H} NMR (201.2 MHz, CDCl<sub>3</sub>): δ 197.4, 173.2, 152.3, 140.5, 136.5, 133.5, 128.7 (2 C), 128.1 (2 C), 115.7 (2 C), 115.6 (2 C), 64.0, 61.4, 54.5, 41.1, 14.9, 14.1; ATR : 3363, 2975, 2862, 1733, 1675, 1518, 1189, 826 cm<sup>-1</sup>; HRMS (ESI) calcd for C<sub>20</sub>H<sub>24</sub>NO<sub>4</sub> [M + H]<sup>+</sup>: 342.1699, found: 342.1701.

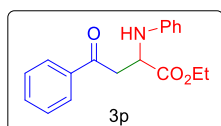

### ***Ethyl-4-oxo-4-phenyl-2-(phenylamino)butanoate (3p)***

To a oven dried 5mL round bottom flask (wrapped in aluminium foil) with a magnetic stirring bar were added glycinate ester **1c** (0.4 mmol, 1 equiv) and eosin Y (5.2 mg, 0.008 mmol, 2 mol%). Then 2 mL of dry DCE was added via syringe followed by addition of Cu(OAc)<sub>2</sub> (3.66 mg, 0.02 mmol, 5 mol%). Then 200 μL of TBHP(70% in H<sub>2</sub>O) was added. The reaction mixture was stirred (for 16h) at room temperature (32-34 °C). Once the glycinate ester **1c** was consumed (monitored by TLC), then β-ketoacid **2a** (0.6 mmol, 96 mg) was added in one shot. The reaction mixture was further stirred for 2h. After completion of the reaction, the reaction mixture was purified by column chromatography on silica gel (10% EtOAc/ petroleum ether –15% EtOAc/ petroleum ether) to afford product **3p** as yellow oil. Yield = 70 mg (59%); <sup>1</sup>H NMR (600MHz, CDCl<sub>3</sub>): δ 7.93 (d, *J* = 7.9 Hz, 2 H), 7.57 (t, *J* = 7.3 Hz, 1 H), 7.46 (t, *J* = 7.6 Hz, 2 H), 7.18 (t, *J* = 7.6 Hz, 2 H), 6.75 (t, *J* = 7.3 Hz, 1 H), 6.69 (d, *J* = 7.9 Hz, 2 H), 4.62 (t, *J* = 5.2 Hz, 1 H), 4.19 (q, *J* = 6.8 Hz, 2 H), 3.58 (dd, *J* = 17.3, 5.1 Hz, 2 H), 1.20 (t, *J* = 6.8 Hz, 3 H); <sup>13</sup>C{<sup>1</sup>H}



**NMR (201.2 MHz, CDCl<sub>3</sub>):**  $\delta$  197.3, 172.8, 146.4, 136.4, 133.5, 129.3 (2 C), 128.6 (2 C), 128.1 (2 C), 118.5, 113.7 (2 C), 61.5, 53.0, 40.8, 14.1; **ATR :** 3380, 2981, 1730, 1681, 1502, 1180, 748 cm<sup>-1</sup>; **HRMS (ESI)** calcd for C<sub>18</sub>H<sub>20</sub>NO<sub>3</sub> [M + H]<sup>+</sup>: 298.1437, found: 298.1437.

(In all the above compounds **3a-3p**, NH protons could not be detected)

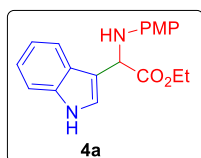

***Ethyl 2-(1H-indol-3-yl)-2-((4-methoxyphenyl)amino)acetate (4a)***

Purified by column chromatography on silica gel (20% EtOAc/ petroleum ether –25% EtOAc/ petroleum ether). The above titled compound was isolated as yellow liquid. Yield = 117 mg (90%). **<sup>1</sup>H NMR (600MHz, CDCl<sub>3</sub>):**  $\delta$  8.27 (brs, 1H), 7.83 (d, *J* = 7.9 Hz, 1H), 7.34 (d, *J* = 7.9 Hz, 1H), 7.23 (t, *J* = 7.3 Hz, 1H), 7.18-7.16 (m, 2 H), 6.77 (d, *J* = 8.5 Hz, 2 H), 6.63 (d, *J* = 8.6 Hz, 2 H), 5.34 (s, 1 H), 4.25 (dq, *J* = 15.4, 7.4 Hz, 1 H), 4.13 (dq, *J* = 15.0, 7.2 Hz, 1 H), 3.73 (s, 3 H), 1.21 (t, *J* = 7.1 Hz, 3H); **<sup>13</sup>C{<sup>1</sup>H} NMR (201.2 MHz, CDCl<sub>3</sub>):**  $\delta$  172.8, 152.5, 140.7, 136.4, 125.7, 123.0, 122.4, 119.9, 119.5, 114.84 (2 C), 114.81 (2 C), 112.6, 111.4, 61.5, 55.7, 55.2, 14.1; **ATR :** 3400, 2981, 2833, 1725, 1510, 1234, 1180, 1130, 933, 820, 742 cm<sup>-1</sup>; **HRMS (ESI)** calcd for C<sub>19</sub>H<sub>20</sub>N<sub>2</sub>NaO<sub>3</sub> [M + Na]<sup>+</sup>: 347.1366, found: 347.1366. Spectral data is close agreement with literature.<sup>11</sup>

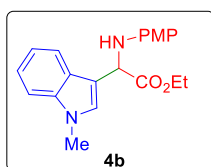

***Ethyl 2-((4-methoxyphenyl)amino)-2-(1-methyl-1H-indol-3-yl)-acetate (4b)***

Purified by column chromatography on silica gel (20% EtOAc/ petroleum ether –25% EtOAc/ petroleum ether). The above titled compound was isolated as yellow liquid. Yield = 116 mg

(86%). **<sup>1</sup>H NMR (600MHz, CDCl<sub>3</sub>):** δ 7.81 (d, *J* = 7.9 Hz, 1H), 7.32-7.30 (m, 1 H), 7.25 (s, 1 H), 7.16 (t, *J* = 7.5 Hz, 1H), 7.11 (s, 1 H), 6.74 (d, *J* = 8.5 Hz, 2 H), 6.62 (d, *J* = 8.5 Hz, 2 H), 5.30 (s, 1 H), 4.25 (dq, *J* = 15.0, 7.3 Hz, 2 H), 4.13 (dq, *J* = 15.2, 7.3 Hz, 1 H), 3.74 (s, 3 H), 3.72 (s, 3 H), 1.22 (t, *J* = 7.1 Hz, 3H); **<sup>13</sup>C{<sup>1</sup>H} NMR (201.2 MHz, CDCl<sub>3</sub>):** δ 172.8, 152.4, 140.8, 137.2, 127.5, 126.3, 122.0, 119.6, 119.5, 114.8 (2 C), 114.7 (2 C), 111.1, 109.4, 61.4, 55.7, 55.1, 32.8, 14.1; **ATR:** 3397, 2935, 2832, 1729, 1511, 1235, 1024, 820, 742 cm<sup>-1</sup>. **HRMS (ESI)** calcd for C<sub>20</sub>H<sub>22</sub>N<sub>2</sub>NaO<sub>3</sub> [M + Na]<sup>+</sup>: 361.1522, found: 361.1515. Spectral data is close agreement with literature.<sup>11</sup>

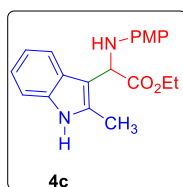

***Ethyl 2-((4-methoxyphenyl)amino)-2-(2-methyl-1H-indol-3-yl)-acetate (4c)***

Purified by column chromatography on silica gel (20% EtOAc/ petroleum ether –25% EtOAc/ petroleum ether). The above titled compound was isolated as yellow liquid. Yield = 124.5 mg (92%). **<sup>1</sup>H NMR (600MHz, CDCl<sub>3</sub>):** δ 8.03 (brs, 1H), 7.80 (dd, *J* = 6.2, 1.8 Hz, 1H), 7.21 (dd, *J* = 6.5, 2.8 Hz, 1H), 7.14-7.10 (m, 2 H), 6.75 (d, *J* = 8.6 Hz, 2 H), 6.60 (d, *J* = 8.6 Hz, 2 H), 5.25 (s, 1 H), 4.27-4.21 (m, 1 H), 4.11-4.05 (m, 1 H), 3.72 (s, 3 H), 2.42 (s, 3 H), 1.18 (t, *J* = 7.0 Hz, 3 H); **<sup>13</sup>C{<sup>1</sup>H} NMR (201.2 MHz, CDCl<sub>3</sub>):** δ 172.6, 152.3, 140.9, 135.1, 133.3, 126.7, 121.3, 119.8, 118.7, 114.8 (2 C), 114.6 (2 C), 110.4, 107.5, 61.3, 55.7, 54.9, 14.1, 12.0; **ATR:** 3394, 2983, 1725, 1510, 1297, 1234, 1175, 822 cm<sup>-1</sup>; **HRMS (ESI)** calcd for C<sub>20</sub>H<sub>22</sub>N<sub>2</sub>NaO<sub>3</sub> [M + Na]<sup>+</sup>: 361.1522, found: 361.1520. Spectral data is close agreement with literature.<sup>11</sup>

**Synthesis of 4c in 1 mmol scale:**

To a oven dried 25mL round bottom flask (wrapped in aluminium foil) with a magnetic stirring bar were added glycinate ester **1a** (209 mg, 1 mmol) and eosin Y (13 mg, 0.02 mmol, 2 mol%).

Then 5 mL of dry DCE was added via syringe followed by addition of  $\text{Cu}(\text{OAc})_2$  (9.0 mg, 0.05 mmol, 5 mol%). The reaction mixture was stirred (for 10h) under air atmosphere at room temperature (30-32 °C). Once the glycinate ester **1a** was consumed (monitored by TLC), then 2-methyl-Indole (144 mg, 1.1 mmol) was added in one portion. The reaction mixture was further stirred for 4h. After completion of the reaction, the reaction mixture was concentrated to one-third of the total volume. The crude residue was purified by column chromatography on silica gel (petroleum ether/EtOAc as the eluent) to afford product **3e** as light-yellow liquid (306 mg, 90%).

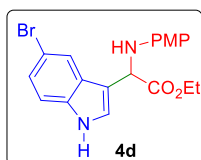

***Ethyl 2-(5-bromo-1H-indol-3-yl)-2-((4-methoxyphenyl)amino)acetate (4d)***

Purified by column chromatography on silica gel (15% EtOAc/ petroleum ether –25% EtOAc/ petroleum ether). The above titled compound was isolated as yellow liquid. Yield = 115 mg (71%).  **$^1\text{H}$  NMR (600MHz,  $\text{CDCl}_3$ ):**  $\delta$  8.35 (s, 1H), 7.97 (s, 1 H), 7.28 (d,  $J = 8.5$  Hz, 1H), 7.18-7.16 (m, 2 H), 6.75 (d,  $J = 8.5$  Hz, 2 H), 6.60 (d,  $J = 8.5$  Hz, 2 H), 5.26 (s, 1 H), 4.28-4.22 (m, 1 H), 4.17-4.11 (m, 1 H), 3.72 (s, 3 H), 1.23 (t,  $J = 7.2$  Hz, 3 H);  **$^{13}\text{C}\{^1\text{H}\}$  NMR (201.2 MHz,  $\text{CDCl}_3$ ):**  $\delta$  172.6, 152.7, 140.6, 135.2, 127.5, 125.4, 124.3, 122.2, 115.0 (2 C), 114.9 (2 C), 113.3, 112.9, 112.5, 61.8, 55.8, 55.1, 14.1; **HRMS (ESI)** calcd for  $\text{C}_{19}\text{H}_{20}\text{N}_2\text{O}_3\text{Br}$  [ $\text{M} + \text{H}$ ] $^+$ : 403.0640, found: 403.0652. Spectral data is close agreement with literature.<sup>12</sup>

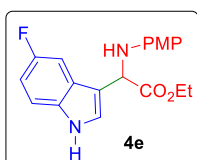

***Ethyl 2-(5-fluoro-1H-indol-3-yl)-2-((4-methoxyphenyl)amino)acetate (4e)***

Purified by column chromatography on silica gel (20% EtOAc/ petroleum ether –25% EtOAc/ petroleum ether). The above titled compound was isolated as yellow liquid. Yield = 102 mg (74%). **<sup>1</sup>H NMR (600MHz, CDCl<sub>3</sub>):** δ 8.27(bris, 1H), 7.48 (d, *J* = 9.6 Hz, 1H), 7.24-7.22 (m, 2 H), 6.96 (td, *J* = 8.9, 1.6 Hz, 1H), 6.75 (d, *J* = 8.5 Hz, 2 H), 6.61 (d, *J* = 8.6 Hz, 2H), 5.26 (s, 1 H), 4.26 (dq, *J* = 11.3, 7.3 Hz, 1H), 4.15 (dq, *J* = 10.7, 7.3 Hz, 1H), 3.72 (s, 3 H), 1.22 (t, *J* = 7.0 Hz, 3H); **<sup>13</sup>C{<sup>1</sup>H} NMR (201.2 MHz, CDCl<sub>3</sub>):** δ 172.6, 157.9 (d, *J*<sub>C-F</sub> = 236.2 Hz), 152.6, 140.6, 132.9, 126.1 (d, *J*<sub>C-F</sub> = 9.4 Hz), 124.7, 114.9 (2 C), 114.8 (2 C), 112.9, 112.0 (d, *J*<sub>C-F</sub> = 8.4 Hz), 110.8 (d, *J*<sub>C-F</sub> = 26.4 Hz), 104.5 (d, *J*<sub>C-F</sub> = 26.1 Hz), 61.6, 55.7, 55.1, 14.1; **HRMS (ESI)** calcd for C<sub>19</sub>H<sub>20</sub>N<sub>2</sub>O<sub>3</sub>F [M + H]<sup>+</sup>: 343.1452, found: 343.1443.

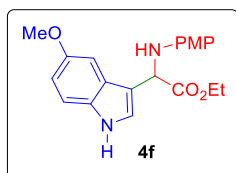

***Ethyl 2-(5-methoxy-1H-indol-3-yl)-2-((4-methoxyphenyl)amin)acetate (4f)***

Purified by column chromatography on silica gel (20% EtOAc/ petroleum ether –25% EtOAc/ petroleum ether). The above titled compound was isolated as yellow liquid. Yield = 111 mg (78%). **<sup>1</sup>H NMR (600MHz, CDCl<sub>3</sub>):** δ 8.21(bris, 1H), 7.26 (s, 1 H), 7.21 (d, *J* = 8.8 Hz, 1H), 7.15 (d, *J* = 1.9 Hz, 1H), 6.87 (dd, *J* = 8.8, 2.1 Hz, 1H), 6.77 (d, *J* = 8.6 Hz, 2 H), 6.63 (d, *J* = 8.9 Hz, 2 H), 5.29 (s, 1 H), 4.26 (dq, *J* = 11.2, 7.3 Hz, 1H), 4.15 (dq, *J* = 10.6, 6.7 Hz, 1H), 3.86 (s, 3 H), 3.73 (s, 3 H), 1.23 (t, *J* = 6.7 Hz, 3H); **<sup>13</sup>C{<sup>1</sup>H} NMR (201.2 MHz, CDCl<sub>3</sub>):** δ 172.8, 154.2, 152.5, 140.8, 131.5, 126.1, 123.7, 114.81(2 C), 114.79 (2 C), 112.7, 112.13, 112.09, 101, 61.4, 55.8, 55.6, 55.2, 14.1; **HRMS (ESI)** calcd for C<sub>20</sub>H<sub>23</sub>N<sub>2</sub>O<sub>4</sub> [M + H]<sup>+</sup>: 355.1652, found: 355.1646. Spectral data is close agreement with literature.<sup>12</sup>

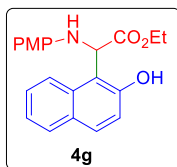

***Ethyl 2-(2-hydroxynaphthalen-1-yl)-2-((4-methoxyphenyl)amino)acetate (4g)***

Purified by column chromatography on silica gel (20% EtOAc/ petroleum ether –25% EtOAc/ petroleum ether). The above titled compound was isolated as red liquid. Yield = 119 mg (84.0 %). **<sup>1</sup>H NMR (600MHz, CDCl<sub>3</sub>):** δ 8.08 (d, *J* = 8.6 Hz, 1H), 7.80 (d, *J* = 8.2 Hz, 1H), 7.72 (d, *J* = 8.8 Hz, 1H), 7.54 (t, *J* = 7.5 Hz, 1H), 7.34 (t, *J* = 7.4 Hz, 1H), 7.06 (d, *J* = 8.9 Hz, 1H), 6.67 (s, 4 H), 5.80 (s, 1 H), 4.26-4.21(m, 1 H), 4.12-4.05 (m, 1 H), 3.67 (s, 3 H), 1.08 (t, *J* = 7.0 Hz, 3H), (OH and NH protons could not be detected); **<sup>13</sup>C{<sup>1</sup>H} NMR (201.2 MHz, CDCl<sub>3</sub>):** δ 171.1, 156.1, 154.6, 138.7, 132.4, 130.5, 129.1, 128.9, 126.8, 122.9, 121.8, 119.7, 117.7 (2 C), 114.7 (2 C), 111.3, 62.3, 57.9, 55.4, 13.8; **ATR :** 3326, 2983, 2834, 1726, 1510, 1212, 1163, 1121, 933, 822, 745 cm<sup>-1</sup>; **HRMS (ESI)** calcd for C<sub>21</sub>H<sub>22</sub>NO<sub>4</sub> [M + H]<sup>+</sup>: 352.1543, found: 352.1545. Spectral data is close agreement with literature.<sup>13</sup>

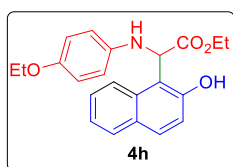

***Ethyl 2-((4-ethoxyphenyl)amino)2-(2-hydroxynaphthalen-1-yl)- acetate (4h)***

Purified by column chromatography on silica gel (15% EtOAc/ petroleum ether –25% EtOAc/ petroleum ether). The above titled compound was isolated as white solid. Yield = 114 mg (78%); Mp: 149-151°C; Mp: 148-149°C<sup>lit11</sup>; **<sup>1</sup>H NMR (600MHz, CDCl<sub>3</sub>):** δ 8.08 (d, *J* = 8.6 Hz, 1H), 7.80 (d, *J* = 8.0 Hz, 1H), 7.73 (d, *J* = 8.8 Hz, 1H), 7.54 (t, *J* = 7.7 Hz, 1H), 7.37 (t, *J* = 7.3Hz, 1H), 7.07 (d, *J* = 8.8 Hz, 1H), 6.66 (s, 4 H), 5.80 (s, 1 H), 4.26-4.21 (m, 1 H), 4.11-4.05 (m, 1 H), 3.87 (q, *J* = 7.0 Hz, 2 H), 1.32 (t, *J* = 7.0 Hz, 3 H), 1.08 (t, *J* = 7.0 Hz, 3 H); (OH

and NH protons could not be detected);  **$^{13}\text{C}\{^1\text{H}\}$  NMR (201.2 MHz,  $\text{CDCl}_3$ ):**  $\delta$  171.1, 156.1, 154.0, 138.6, 132.4, 130.5, 129.1, 128.9, 126.8, 122.9, 121.9, 119.8, 117.7 (2 C), 115.4 (2 C), 111.2, 63.7, 62.4, 58.0, 14.8, 13.8; **ATR :** 3327, 2981, 2902, 1726, 1510, 1212, 1163, 1117, 821, 745  $\text{cm}^{-1}$ ; **HRMS (ESI)** calcd for  $\text{C}_{22}\text{H}_{24}\text{NO}_4$   $[\text{M} + \text{H}]^+$ : 366.1699, found: 366.1699. Spectral data is close agreement with literature.<sup>13</sup>

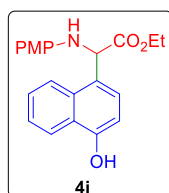

***Ethyl 2-(4-hydroxynaphthalen-1-yl)-2-((4-methoxyphenyl)amino)acetate (4i)***

Purified by column chromatography on silica gel (10% EtOAc/ petroleum ether –15% EtOAc/ petroleum ether). The above titled compound was isolated as red liquid. Yield = 120 mg (85.0 %).  **$^1\text{H}$  NMR (600MHz,  $\text{CDCl}_3$ ):**  $\delta$  8.27 (d,  $J = 8.0$  Hz, 1H), 7.79 (d,  $J = 7.8$  Hz, 1H), 7.51-7.45 (m, 2H), 7.42 (d,  $J = 8.3$  Hz, 1H), 7.36 (d,  $J = 8.5$  Hz, 1H), 6.79-6.78 (m, 2 H), 6.75-6.74 (m, 2 H), 5.08 (s, 1 H), 4.31-4.26 (m, 1 H), 4.20-4.14 (m, 1 H), 3.71 (s, 3 H), 1.21 (t,  $J = 7.0$  Hz, 3H), (OH and NH protons could not be detected);  **$^{13}\text{C}\{^1\text{H}\}$  NMR (201.2 MHz,  $\text{CDCl}_3$ ):**  $\delta$  171.2, 154.7, 153.0, 138.8, 134.2, 127.2, 126.8, 126.6, 125.4, 125.1, 122.4, 119.4, 117.9 (2 C), 114.7 (2 C), 113.2, 63.4, 62.4, 55.5, 13.9; **HRMS (ESI)** calcd for  $\text{C}_{21}\text{H}_{22}\text{NO}_4$   $[\text{M} + \text{H}]^+$ : 352.1543, found: 352.1543. Spectral data is close agreement with literature.<sup>13</sup>

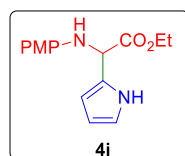

***Ethyl 2-((4-methoxyphenyl)amino)-2-(1H-pyrro)acetate (4j)***

Purified by column chromatography on silica gel (15% EtOAc/ petroleum ether –25% EtOAc/ petroleum ether). The above titled compound was isolated as yellow liquid which turns to black

with time. Yield = 75 mg (68%);  $^1\text{H NMR}$  (600MHz,  $\text{CDCl}_3$ ):  $\delta$  8.6 (brs, 1H), 6.75 (d,  $J = 8.6$  Hz, 2 H), 6.72 (s, 1 H), 6.60 (d,  $J = 8.6$  Hz, 2 H), 6.24 (brs, 1 H), 6.19-6.17 (m, 1 H), 5.07 (s, 1H), 4.28-4.23 (m, 1 H), 4.22-4.17(m, 1H), 3.73 (s, 3 H), 1.27 (t,  $J = 7.3$  Hz, 3 H);  $^{13}\text{C}\{^1\text{H}\}$  NMR (201.2 MHz,  $\text{CDCl}_3$ ):  $\delta$  171.5, 153.0, 140.5, 126.9, 117.9, 115.2 (2 C), 114.8 (2 C), 108.9, 106.9, 61.9, 56.6, 55.7, 14.1. Spectral data is close agreement with literature.<sup>13</sup>

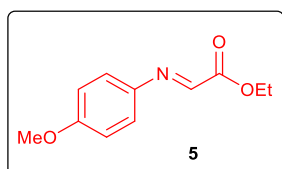

***Ethyl-(E)-2-((4-methoxyphenyl)imino)acetate (5)***<sup>14</sup>

$^1\text{H NMR}$  (300MHz,  $\text{CDCl}_3$ ):  $\delta$  7.94 (s, 1 H), 7.36 (d,  $J = 9.0$  Hz, 2 H), 6.94 (d,  $J = 9.0$  Hz, 2 H), 4.42 (q,  $J = 7.1$  Hz, 2 H), 3.84 (s, 3 H), 1.41 (t,  $J = 7.1$  Hz, 3 H);  $^{13}\text{C}\{^1\text{H}\}$  NMR (201.2 MHz,  $\text{CDCl}_3$ ):  $\delta$  163.6, 160.5, 148.0, 141.4, 123.6, 114.5, 61.9, 55.5, 14.2. LRMS:  $[\text{M}+\text{Na}]^+$ : 230.05.

## 12. References

1. M. C. Ryan, L. D. Whitmire, D. S. Mccann and S. S. Stahl, *Inorg. Chem.* 2019, **58**, 10194–10200.
2. Z. -H. Wang, P.-S. Gao, X. Wang, J. -Q. Gao, X.-T. Xu, Z. He, C. Ma and T. -S. Mei, *J. Am. Chem. Soc.* 2021, **143**, 15599-15605.
3. J. Rostoll-Berenguer, G. Blay, M. Carmen Muñoz, J. R. Pedro and C. Vila, *Org. Lett.* 2018, **20**, 6011–6015.
4. A. D. Saragih and D. -H. Kuo, *Materials Science & Engineering B.* 2019, **250**, 114437.
5. (a) J. F. Moulder, W. F. Stickle, P. E. Sobol and K. D. Bomben, In *Handbook of X-ray Photoelectron Spectroscopy*; Chastain, J., Ed.; Perkin-Elmer Corporation: Eden Prairie, MN; (b) T. Yoshida and S. Sawada, *Bull. Chem. Soc. Jpn.* 1974, **47**, 1024-1025; (c) D.

- B. Wang, B. H. Chen, B. Zhang and Y. X. Ma, *Polyhedron*, 1997, **16**, 2625-2629; (d) R. Fu, N. Yoshizawa, M. S. Dresselhaus, G. Dresselhaus, J. H. Satcher and Jr, T. F. Baumann, *Langmuir*, 2002, **18**, 10100-10104; (e) W. -L. Lei, K. -W. Feng, T. Wang, L. -Z. Wu and Q. Liu, *Org. Lett.* 2018, **20**, 7220 –7224.
6. (a) C. Huo, Y. Yuan, M. Wu, X. Jia, X. Wang, F. Chen and J. Tang, *Angew. Chem. Int. Ed.* 2014, **53**,13544-13547; (b) L. Yang, Z. Qiu, J. Wu, J. Zhao, T. Shen, X. Huang and Z. -Q. Liu, *Org. Lett.* 2021, **23**, 3207 –3210.
7. R. Rohlmann, T. Stopka, H. Richter and O. G. Mancheño, *J. Org. Chem.* 2013, **78**, 6050-6064.
8. (a) D. A. Evans, S. Mito and D. Seidel, *J. Am. Chem. Soc.* 2007, **129**, 11583-11592; (b) V. G. Lisnyak, T. Lynch-Colameta and S. A. Snyder, *Angew. Chem. Int. Ed.* 2018, **57**,15162-15166.
9. M. Böhm, K. Proksch and R. Mahrwald, *Eur. J. Org. Chem.* 2013, 1046-1049.
10. S. Kobayashi, R. Akiyama and H. Kitagawa, *J. Comb. Chem.* 2001, **2**, 196-204.
11. (a) C. Ni, W. Chen, C. Jiang and H. Lu, *New J. Chem.*, 2020, **44**, 313-316; (b) M. S. Segundo, I. Guerrero and A. Correa. *Org. Lett.*, 2017, **19**, 5288-5291.
12. X. -W. Gao, Q.-Y. Meng, J.-X. Li, J. -J Zhong, T. Lei, X. -B. Li, C. -H. Tung and L. -Z. Wu, *ACS Catal.* 2015, **5**, 2391–2396.
13. S. Li, X. Yang, Y. Wang, H. Zhou, B. Zhang, G. Huang, Y. Zhang and Y. Li, *Adv. Synth. Catal.* 2018, **360**, 4452 –4456.
14. C. Retich and S. Bräse, *Eur. J. Org. Chem.* 2018, 66-70.



**<sup>1</sup>H NMR, 600 MHz, CDCl<sub>3</sub>**

**CDCl<sub>3</sub>**

7.258  
6.796  
6.782  
6.596  
6.583

4.246  
4.235  
4.223  
4.211  
3.859  
3.742

1.298  
1.286  
1.274

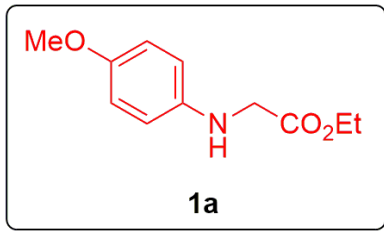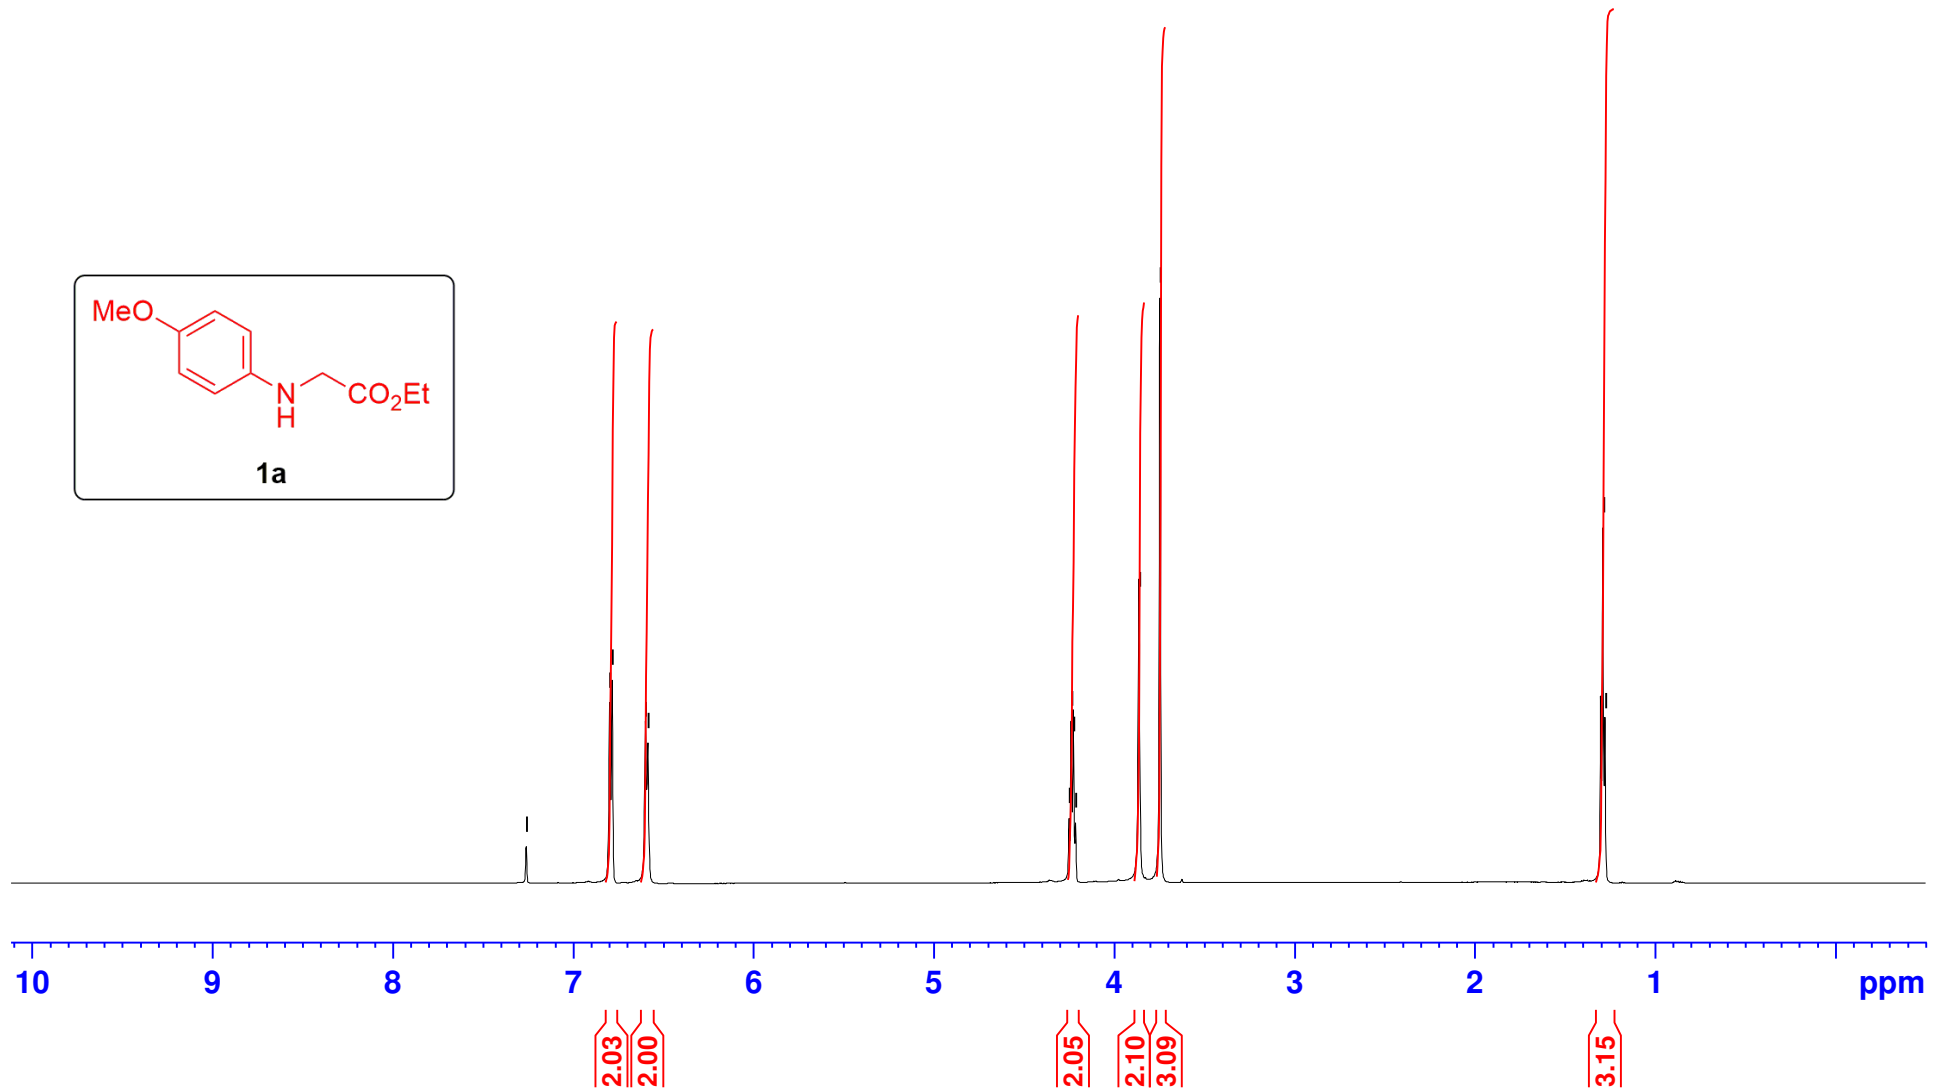

<sup>13</sup>C NMR, 201.2 MHz, CDCl<sub>3</sub>

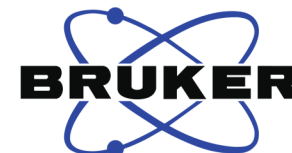

Current Data Parameters  
NAME barc-PMPgly-13C-25Aug21  
EXPNO 1  
PROCNO 1

F2 - Acquisition Parameters  
Date\_ 20210825  
Time 13.15 h  
INSTRUM spect  
PROBHD Z555801\_0012 (  
PULPROG zgdc  
TD 16384  
SOLVENT CDCl3  
NS 181  
DS 4  
SWH 48543.688 Hz  
FIDRES 5.925743 Hz  
AQ 0.1687552 sec  
RG 71.8  
DW 10.300 usec  
DE 6.50 usec  
TE 298.0 K  
D1 3.0000000 sec  
D11 0.0300000 sec  
TD0 1  
SF01 201.1878208 MHz  
NUC1 13C  
P1 8.00 usec  
PLW1 312.79998779 W  
SF02 800.0332001 MHz  
NUC2 1H  
CPDPRG[2] waltz16  
PCPD2 60.00 usec  
PLW2 13.0000000 W  
PLW12 0.29249999 W

F2 - Processing parameters  
SI 16384  
SF 201.1677156 MHz  
WDW EM  
SSB 0  
LB 5.00 Hz  
GB 0  
PC 1.40

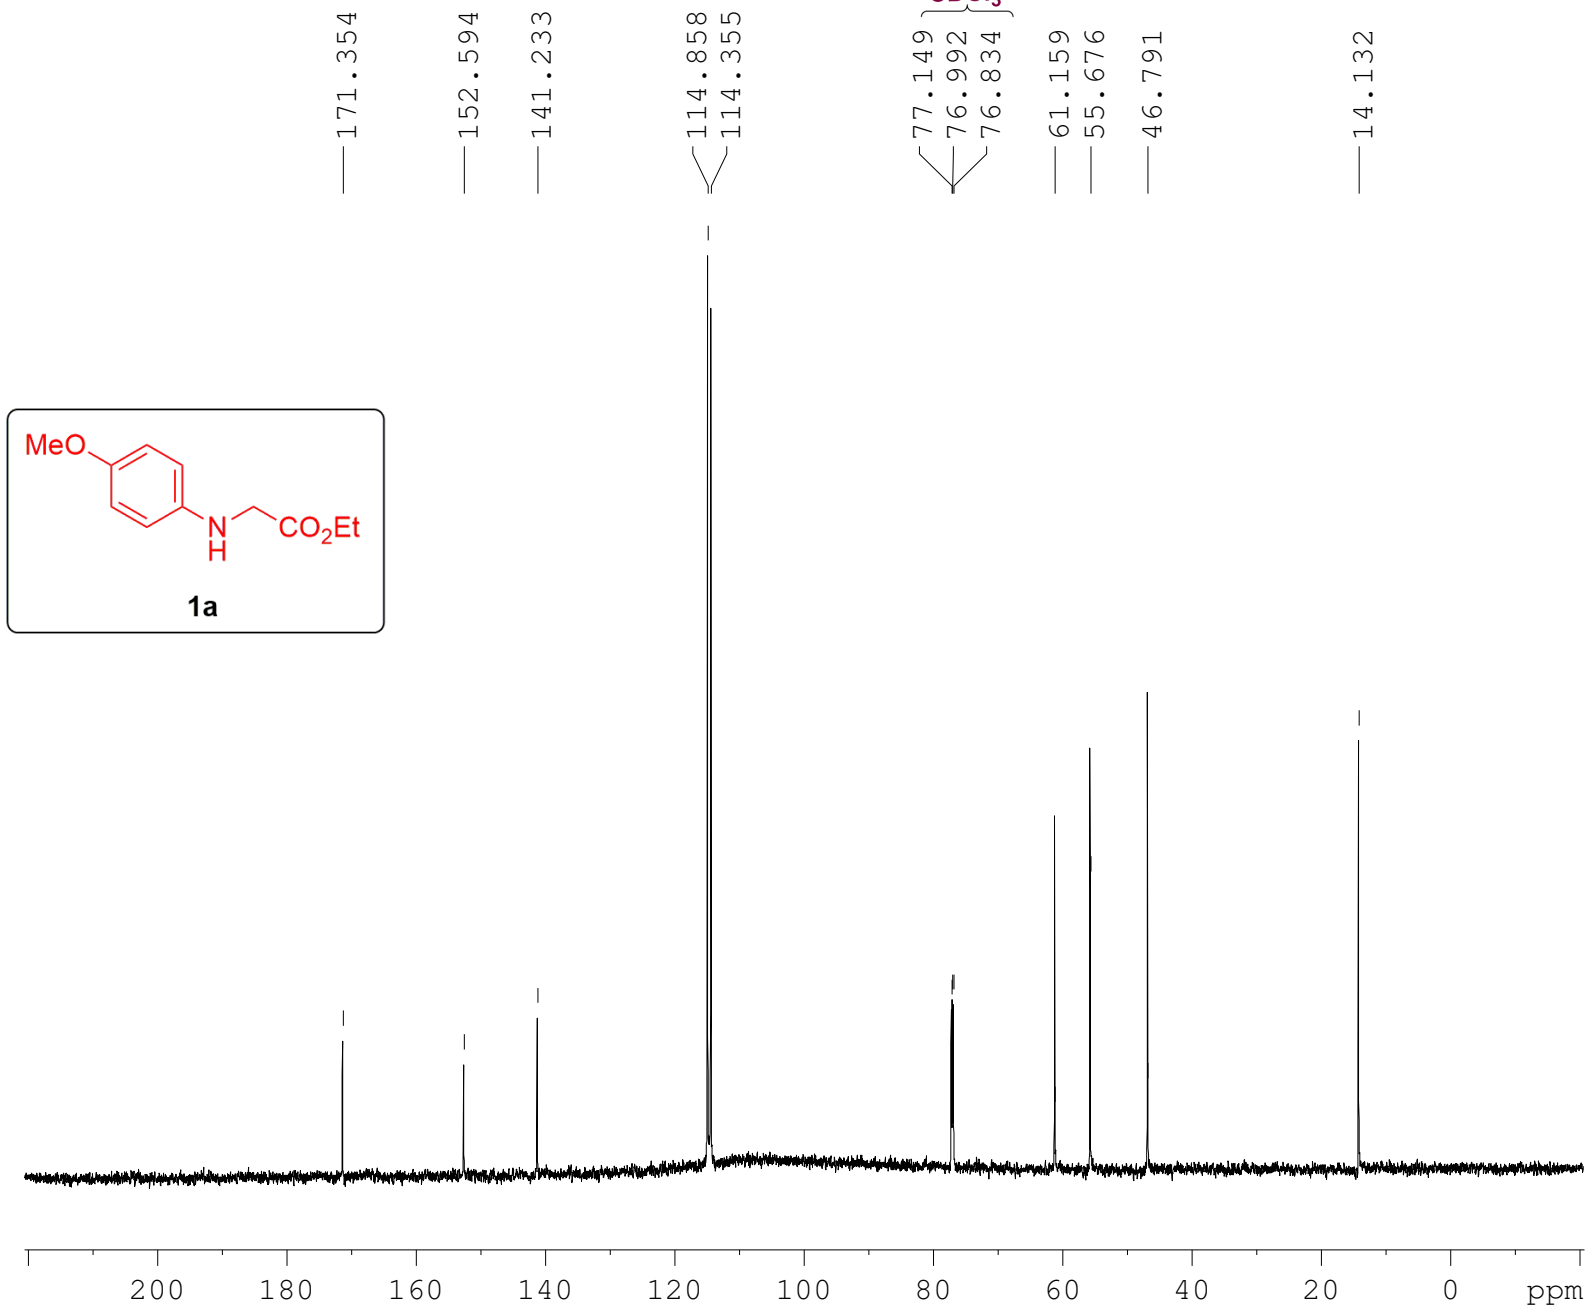

<sup>1</sup>H NMR, 600 MHz, CDCl<sub>3</sub>

CDCl<sub>3</sub>

7.259  
6.799  
6.784  
6.599  
6.586

3.882  
3.769  
3.744

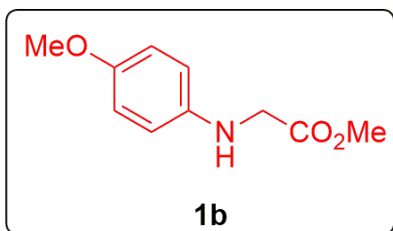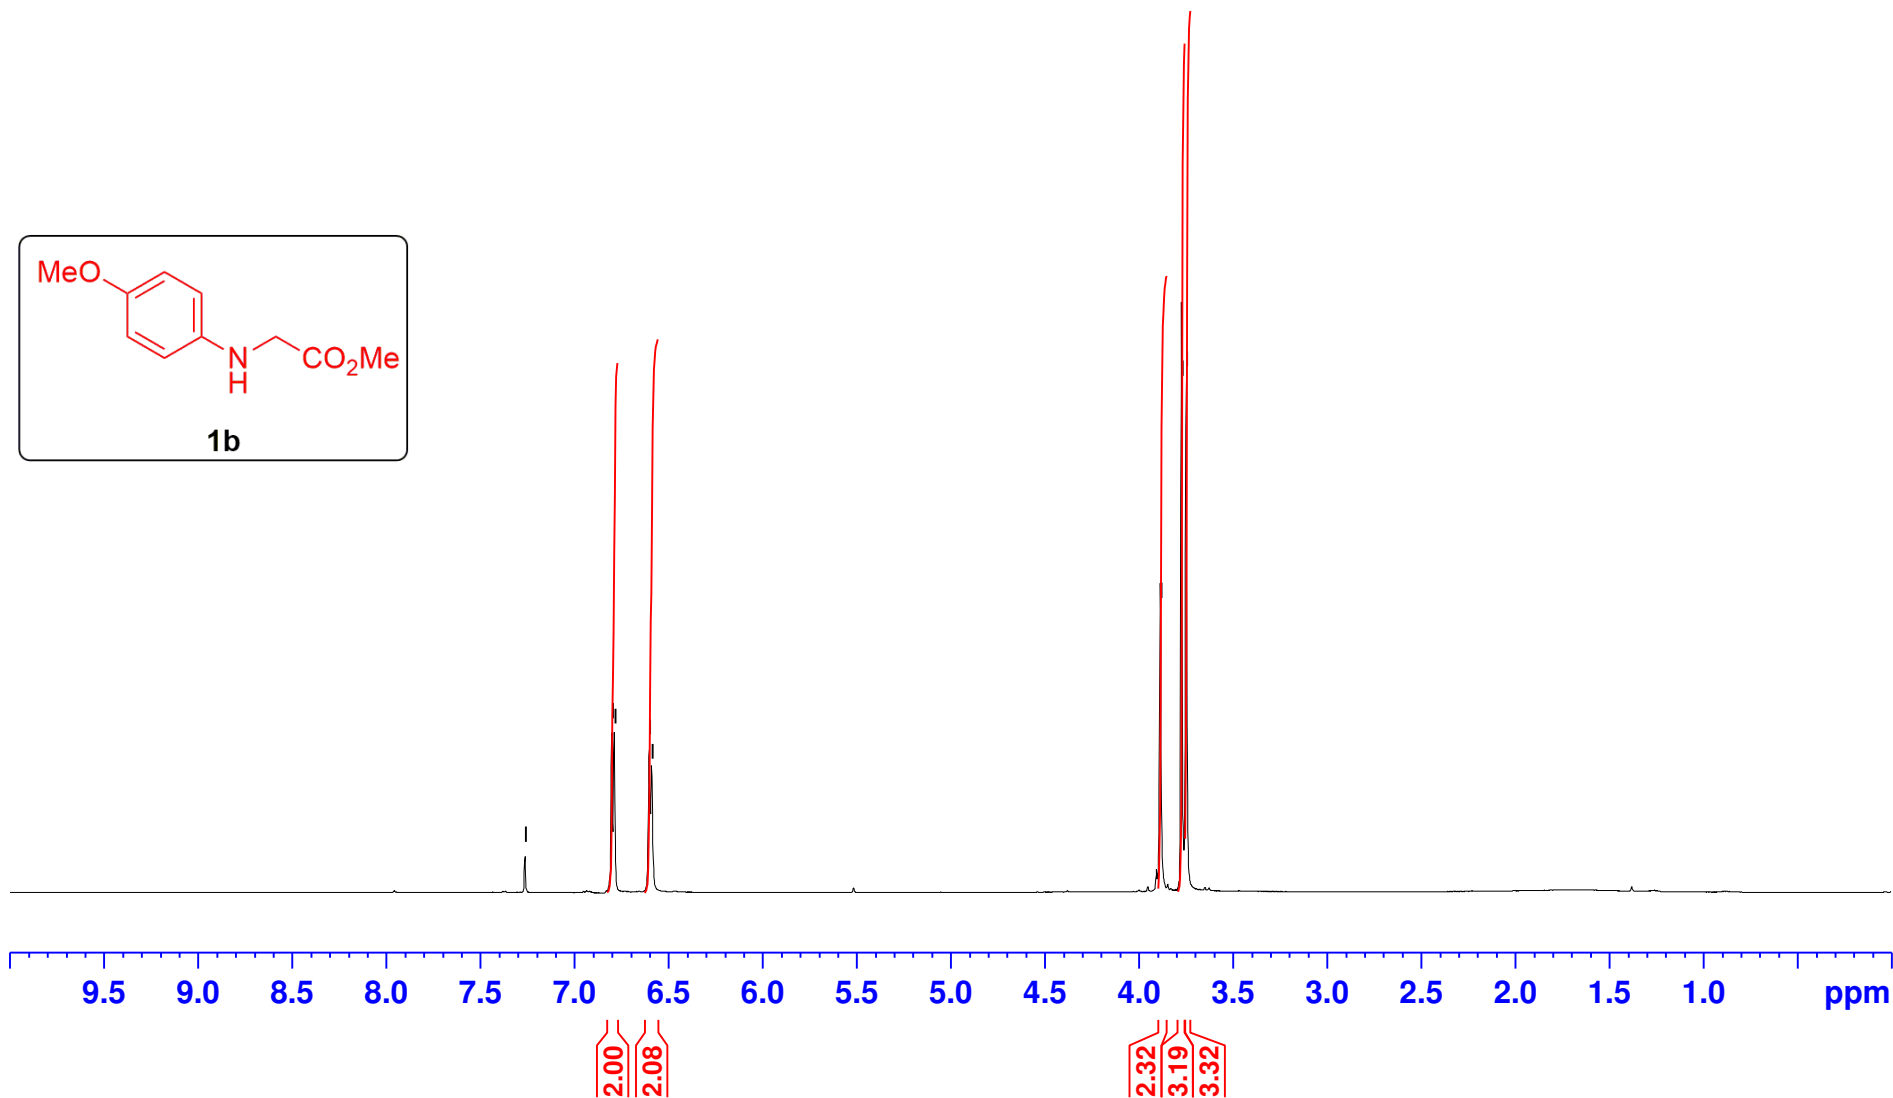

<sup>13</sup>C NMR, 201.2 MHz, CDCl<sub>3</sub>

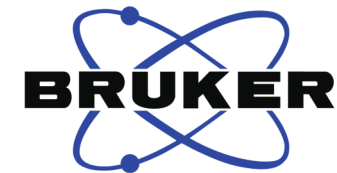

— 171.883  
— 152.685  
— 141.174  
114.918  
114.389  
CDCl<sub>3</sub>  
77.155  
76.996  
76.839  
55.724  
52.162  
46.651

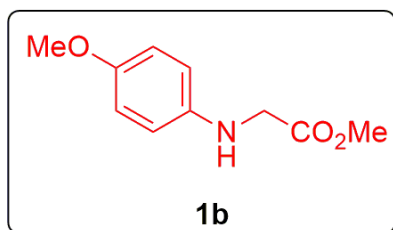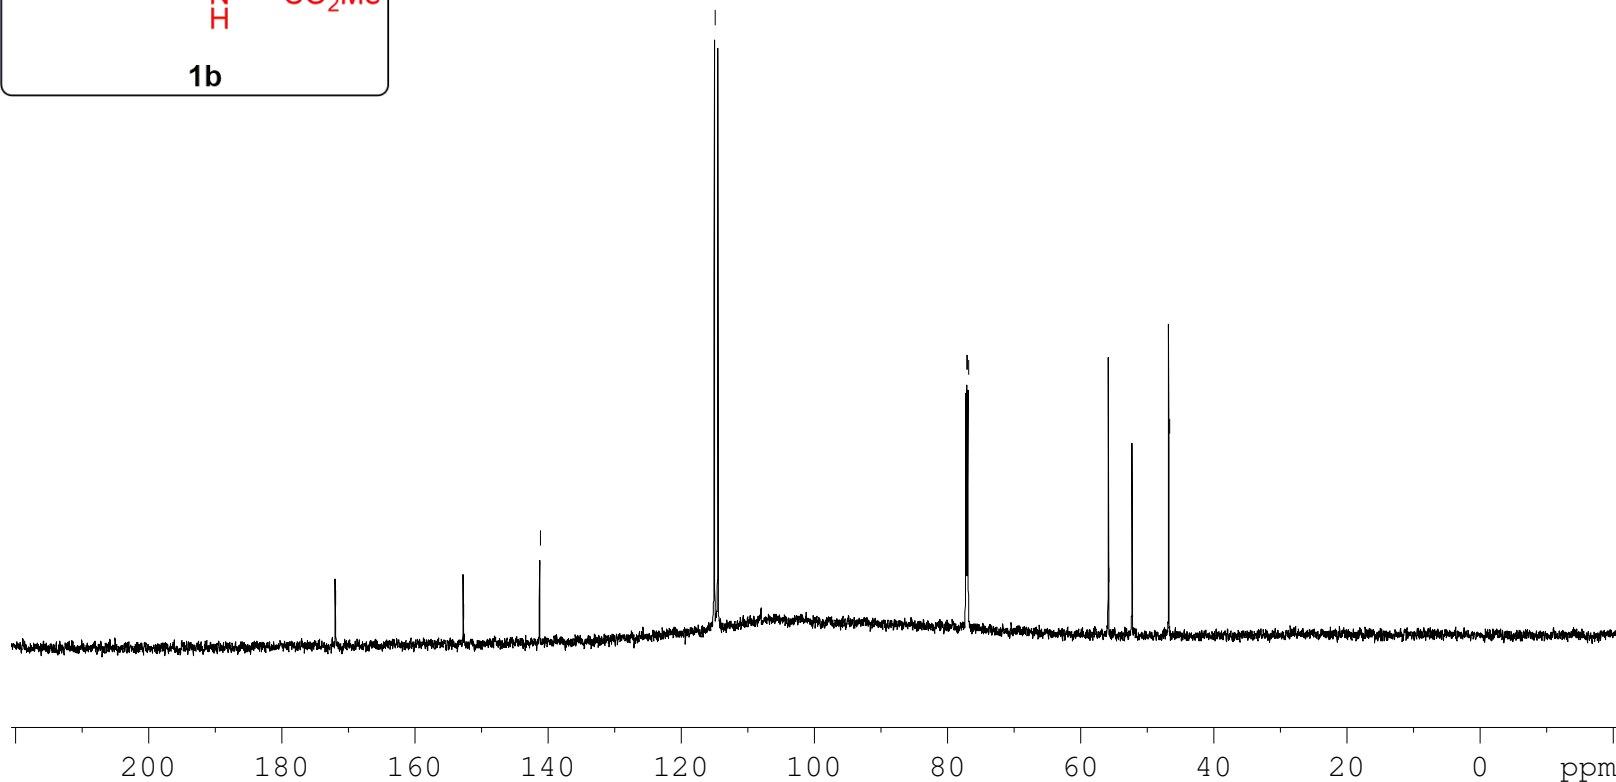

Current Data Parameters  
NAME barc-RC-1843-13C-Feb22  
EXPNO 1  
PROCNO 1  
F2 - Acquisition Parameters  
Date\_ 20220209  
Time 12.25 h  
INSTRUM spect  
PROBHD Z555801\_0012 ( )  
PULPROG zgpg  
TD 16384  
SOLVENT CDCl3  
NS 331  
DS 4  
SWH 48543.688 Hz  
FIDRES 5.925743 Hz  
AQ 0.1687552 sec  
RG 71.8  
DW 10.300 usec  
DE 6.50 usec  
TE 298.0 K  
D1 3.00000000 sec  
D11 0.03000000 sec  
TDO 1  
SFO1 201.1878208 MHz  
NUC1 13C  
P1 9.00 usec  
PLW1 312.79998779 W  
SFO2 800.0332001 MHz  
NUC2 1H  
CPDPRG2 waltz16  
PCPD2 60.00 usec  
PLW2 13.00000000 W  
PLW12 0.29249999 W  
F2 - Processing parameters  
SI 16384  
SF 201.1677089 MHz  
WDW EM  
SSB 0  
LB 5.00 Hz  
GB 0  
PC 1.40

$^1\text{H}$  NMR, 600 MHz,  $\text{CDCl}_3$

$\text{CDCl}_3$

7.259  
7.211  
7.199  
7.186  
6.770  
6.758  
6.746  
6.626  
6.613

4.268  
4.256  
4.244  
4.232  
3.904

1.313  
1.301  
1.290

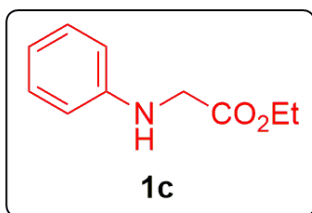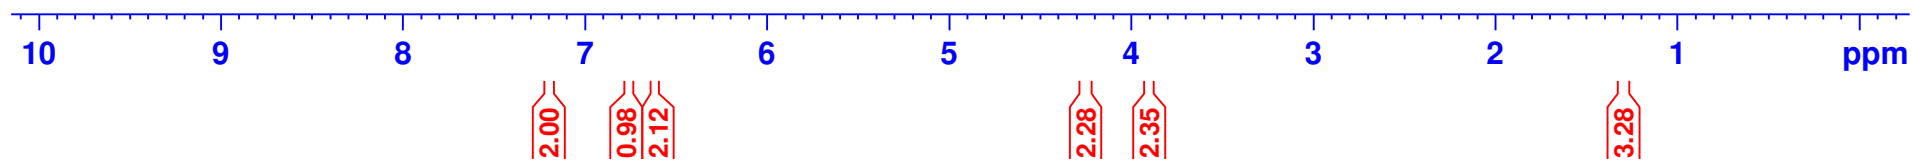

<sup>13</sup>C NMR, 201.2 MHz, CDCl<sub>3</sub>

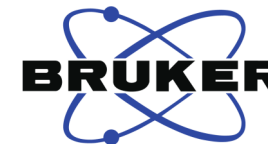

Current Data Parameters  
NAME barc-RC-Ph-Gly-13C-Feb22  
EXPNO 1  
PROCNO 1

F2 - Acquisition Parameters  
Date\_ 20220209  
Time 11.57 h  
INSTRUM spect  
PROBHD Z555801\_0012 (  
PULPROG zgdc  
TD 16384  
SOLVENT CDCl3  
NS 119  
DS 4  
SWH 48543.688 Hz  
FIDRES 5.925743 Hz  
AQ 0.1687552 sec  
RG 71.8  
DW 10.300 usec  
DE 6.50 usec  
TE 298.1 K  
D1 3.0000000 sec  
D11 0.0300000 sec  
TDO 1  
SF01 201.1878208 MHz  
NUC1 13C  
P1 9.00 usec  
PLW1 312.79998779 W  
SF02 800.0332001 MHz  
NUC2 1H  
CPDPRG2 waltz16  
PCPD2 60.00 usec  
PLW2 13.0000000 W  
PLW12 0.29249999 W

F2 - Processing parameters  
SI 16384  
SF 201.1677168 MHz  
WDW EM  
SSB 0  
LB 5.00 Hz  
GB 0  
PC 1.40

— 171.097  
— 146.988  
— 129.267  
— 118.145  
— 112.961  
— 77.147 } CDCl<sub>3</sub>  
— 76.990 }  
— 76.832 }  
— 61.269  
— 45.819  
— 14.147

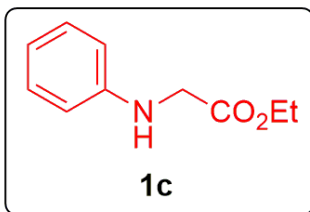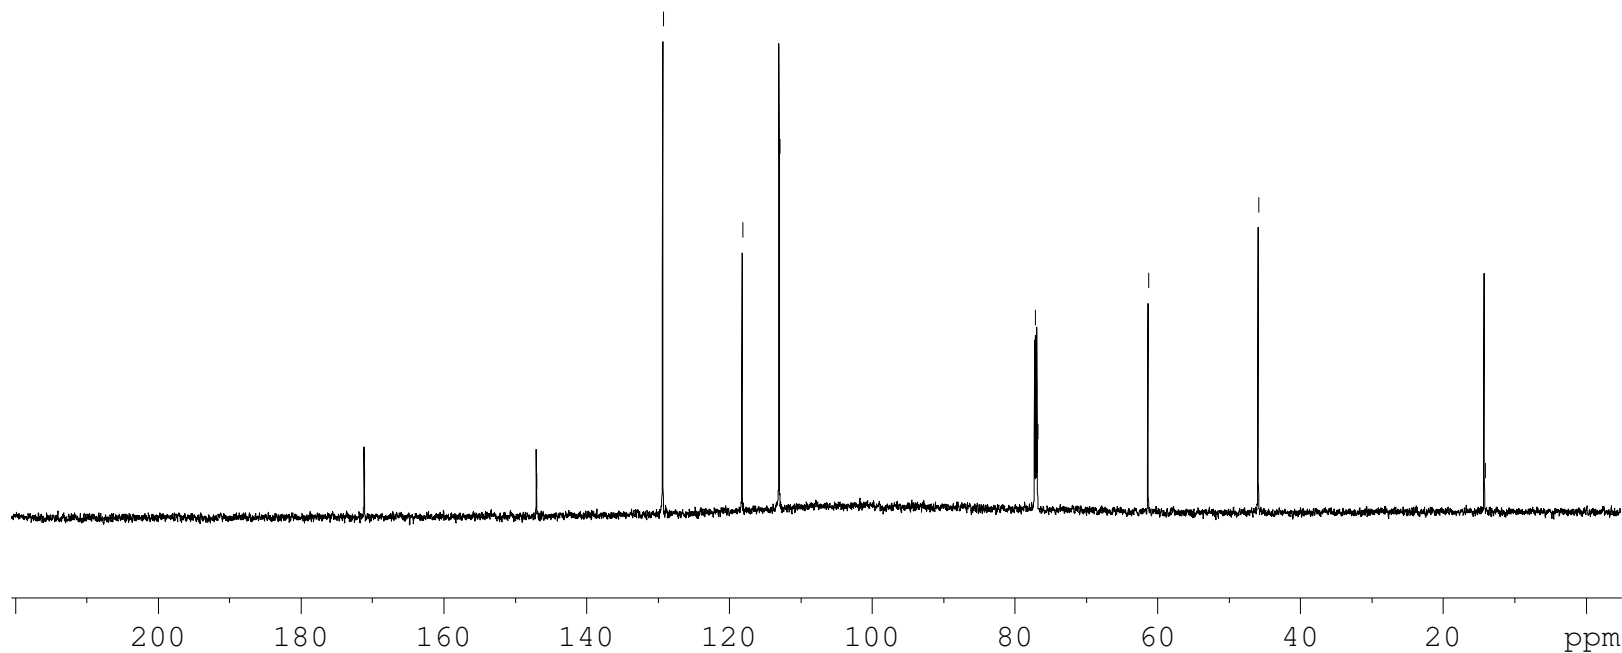

$\text{CDCl}_3$

$^1\text{H NMR}$ , 600 MHz,  $\text{CDCl}_3$

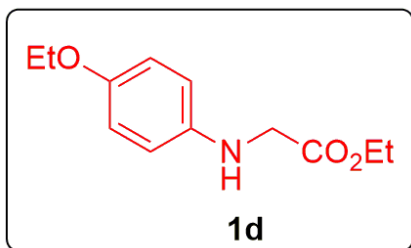

— 7.257  
6.788  
6.774  
6.580  
6.566

4.244  
4.232  
4.220  
4.213  
4.210  
3.970  
3.959  
3.947  
3.940  
3.937  
3.854

1.376  
1.365  
1.353  
1.347  
1.294  
1.283  
1.275  
1.271

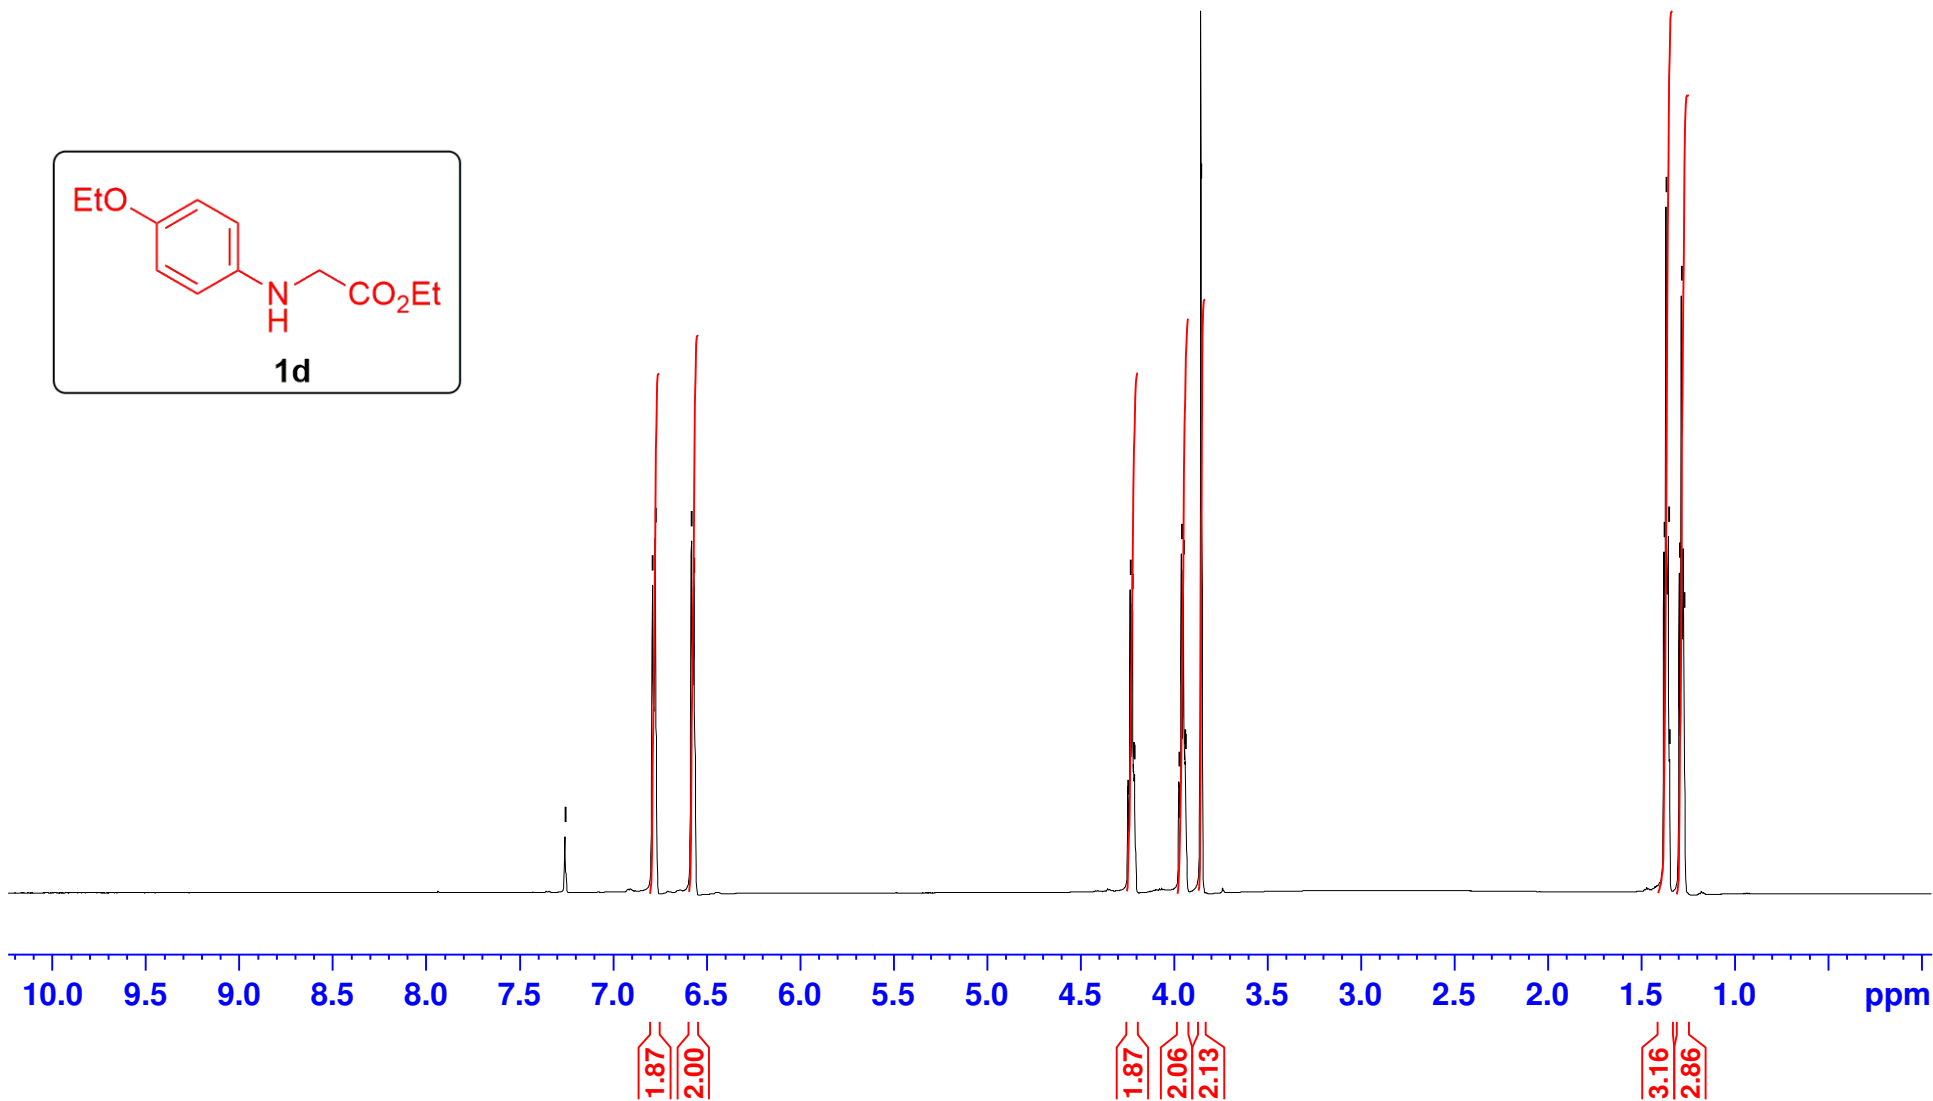

<sup>13</sup>C NMR, 201.2 MHz, CDCl<sub>3</sub>

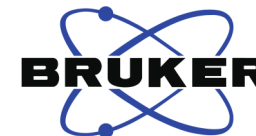

Current Data Parameters  
NAME barc-RC-Oet-Gly-13C-Feb22  
EXPNO 1  
PROCNO 1

F2 - Acquisition Parameters  
Date\_ 20220209  
Time 11.38 h  
INSTRUM spect  
PROBHD z555801\_0012 (zgc)  
PULPROG zgdc  
TD 16384  
SOLVENT CDCl3  
NS 110  
DS 4  
SWH 48543.688 Hz  
FIDRES 5.925743 Hz  
AQ 0.1687552 sec  
RG 71.8  
DW 10.300 usec  
DE 6.50 usec  
TE 298.0 K  
D1 3.0000000 sec  
D11 0.0300000 sec  
TD0 1  
SFO1 201.1878208 MHz  
NUC1 13C  
P1 9.00 usec  
PLW1 312.79998779 W  
SFO2 800.0332001 MHz  
NUC2 1H  
CPDPRG2 waltz16  
PCPD2 60.00 usec  
PLW2 13.0000000 W  
PLW12 0.29249999 W

F2 - Processing parameters  
SI 16384  
SF 201.1677117 MHz  
WDW EM  
SSB 0  
LB 5.00 Hz  
GB 0  
PC 1.40

— 171.383  
— 151.901  
— 141.219  
— 115.733  
— 114.360  
— 77.154  
— 76.995  
— 76.837  
— 64.015  
— 61.187  
— 46.832  
— 14.957  
— 14.165

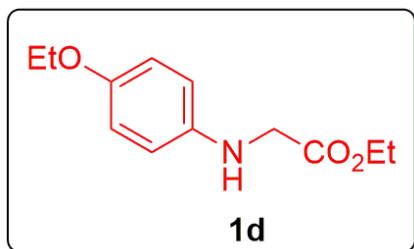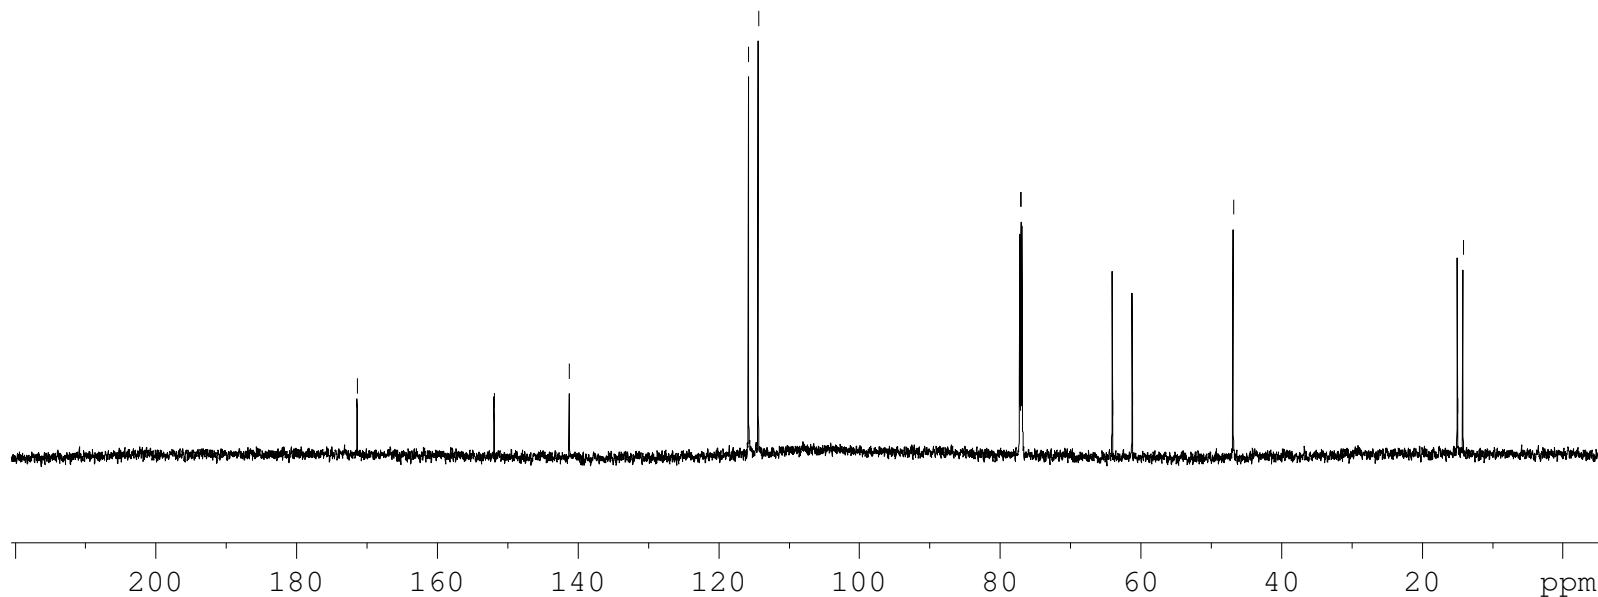



<sup>1</sup>H NMR, 600 MHz, CDCl<sub>3</sub>

CDCl<sub>3</sub>

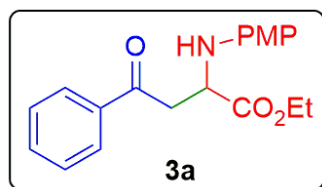

7.942  
7.929  
7.581  
7.569  
7.557  
7.470  
7.458  
7.445  
7.257  
6.776  
6.762  
6.689  
6.674

4.542  
4.533  
4.524  
4.189  
4.178  
4.166  
4.154  
3.730  
3.527  
3.518

1.207  
1.196  
1.184

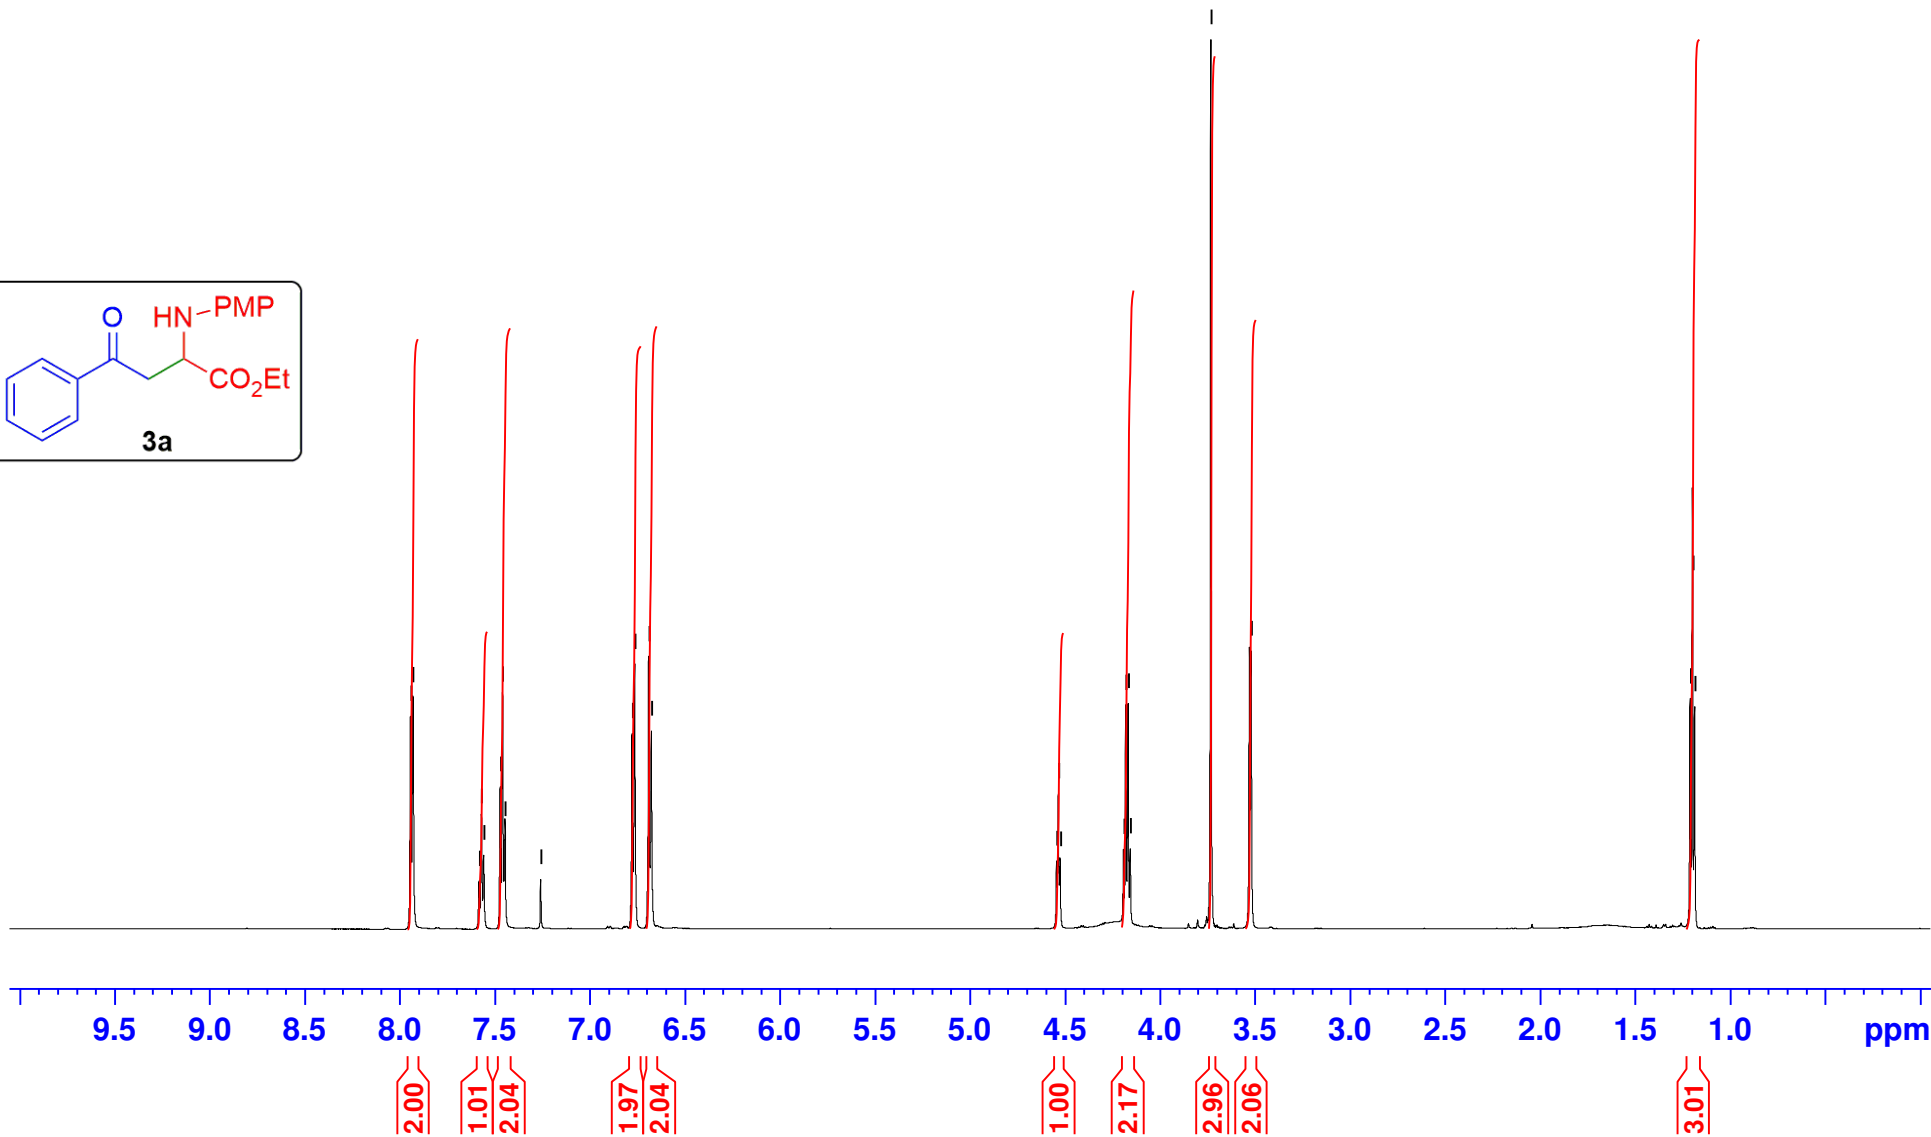

<sup>13</sup>C NMR, 201.2 MHz, CDCl<sub>3</sub>

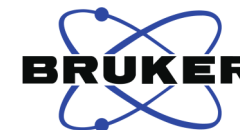

Current Data Parameters  
NAME barc-RC-1858-13C-15Jan21  
EXPNO 1  
PROCNO 1

F2 - Acquisition Parameters  
Date\_ 20210115  
Time 15.25 h  
INSTRUM spect  
PROBHD Z44909\_0011 (C  
PULPROG zgdc  
TD 16384  
SOLVENT CDCl3  
NS 293  
DS 4  
SWH 48543.688 Hz  
FIDRES 5.925743 Hz  
AQ 0.1687552 sec  
RG 71.8  
DW 10.300 usec  
DE 18.00 usec  
TE 298.0 K  
D1 3.0000000 sec  
D11 0.03000000 sec  
TD0 1  
SFO1 201.1878208 MHz  
NUC1 13C  
P1 15.00 usec  
PLW1 141.03999329 W  
SFO2 800.0332001 MHz  
NUC2 1H  
CPDPRG[2] waltz16  
PCPD2 60.00 usec  
PLW2 10.18999958 W  
PLW12 0.16679481 W

F2 - Processing parameters  
SI 16384  
SF 201.1677040 MHz  
WDW EM  
SSB 0  
LB 5.00 Hz  
GB 0  
PC 1.40

— 197.396

— 173.206

— 153.017

— 140.599

— 136.520

— 133.499

— 128.694

— 128.141

— 115.748

— 114.866

CDCl<sub>3</sub>

77.207

77.047

76.888

61.451

55.701

54.509

— 41.099

— 14.099

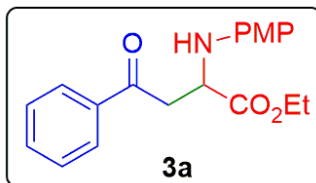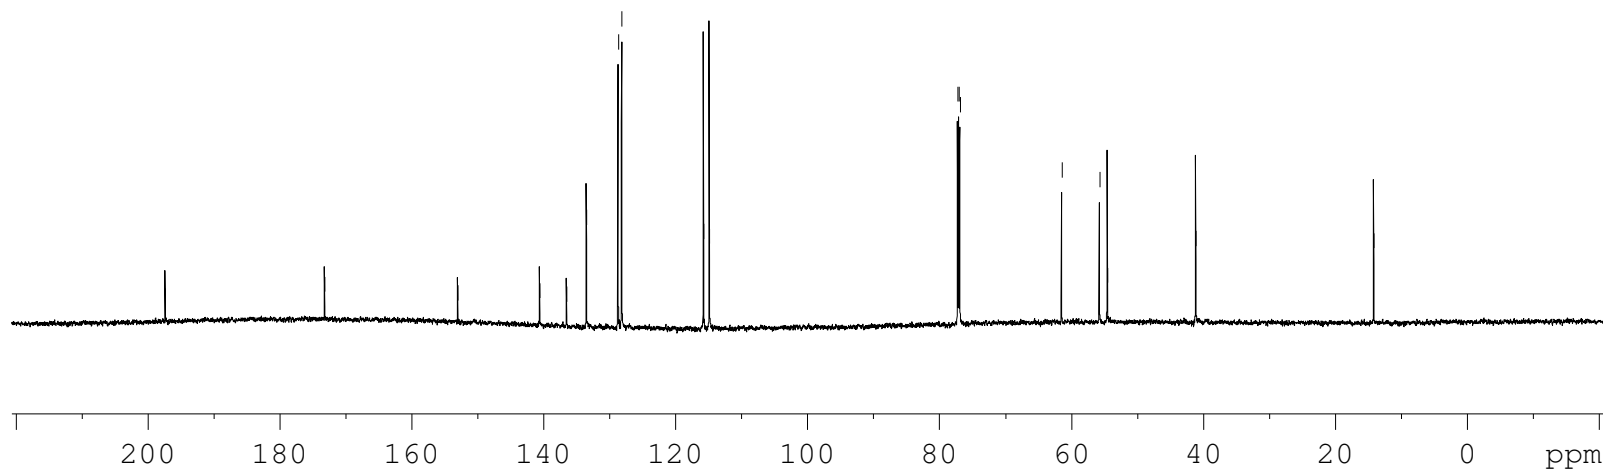

<sup>1</sup>H NMR, 600 MHz, CDCl<sub>3</sub>

CDCl<sub>3</sub>

7.938  
7.925  
7.583  
7.571  
7.559  
7.471  
7.458  
7.445  
7.256  
6.777  
6.763  
6.681  
6.667

4.557  
4.549  
4.540

3.729  
3.716  
3.544  
3.536

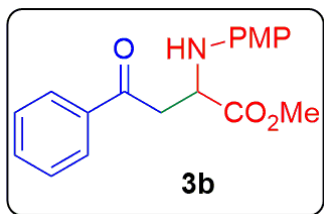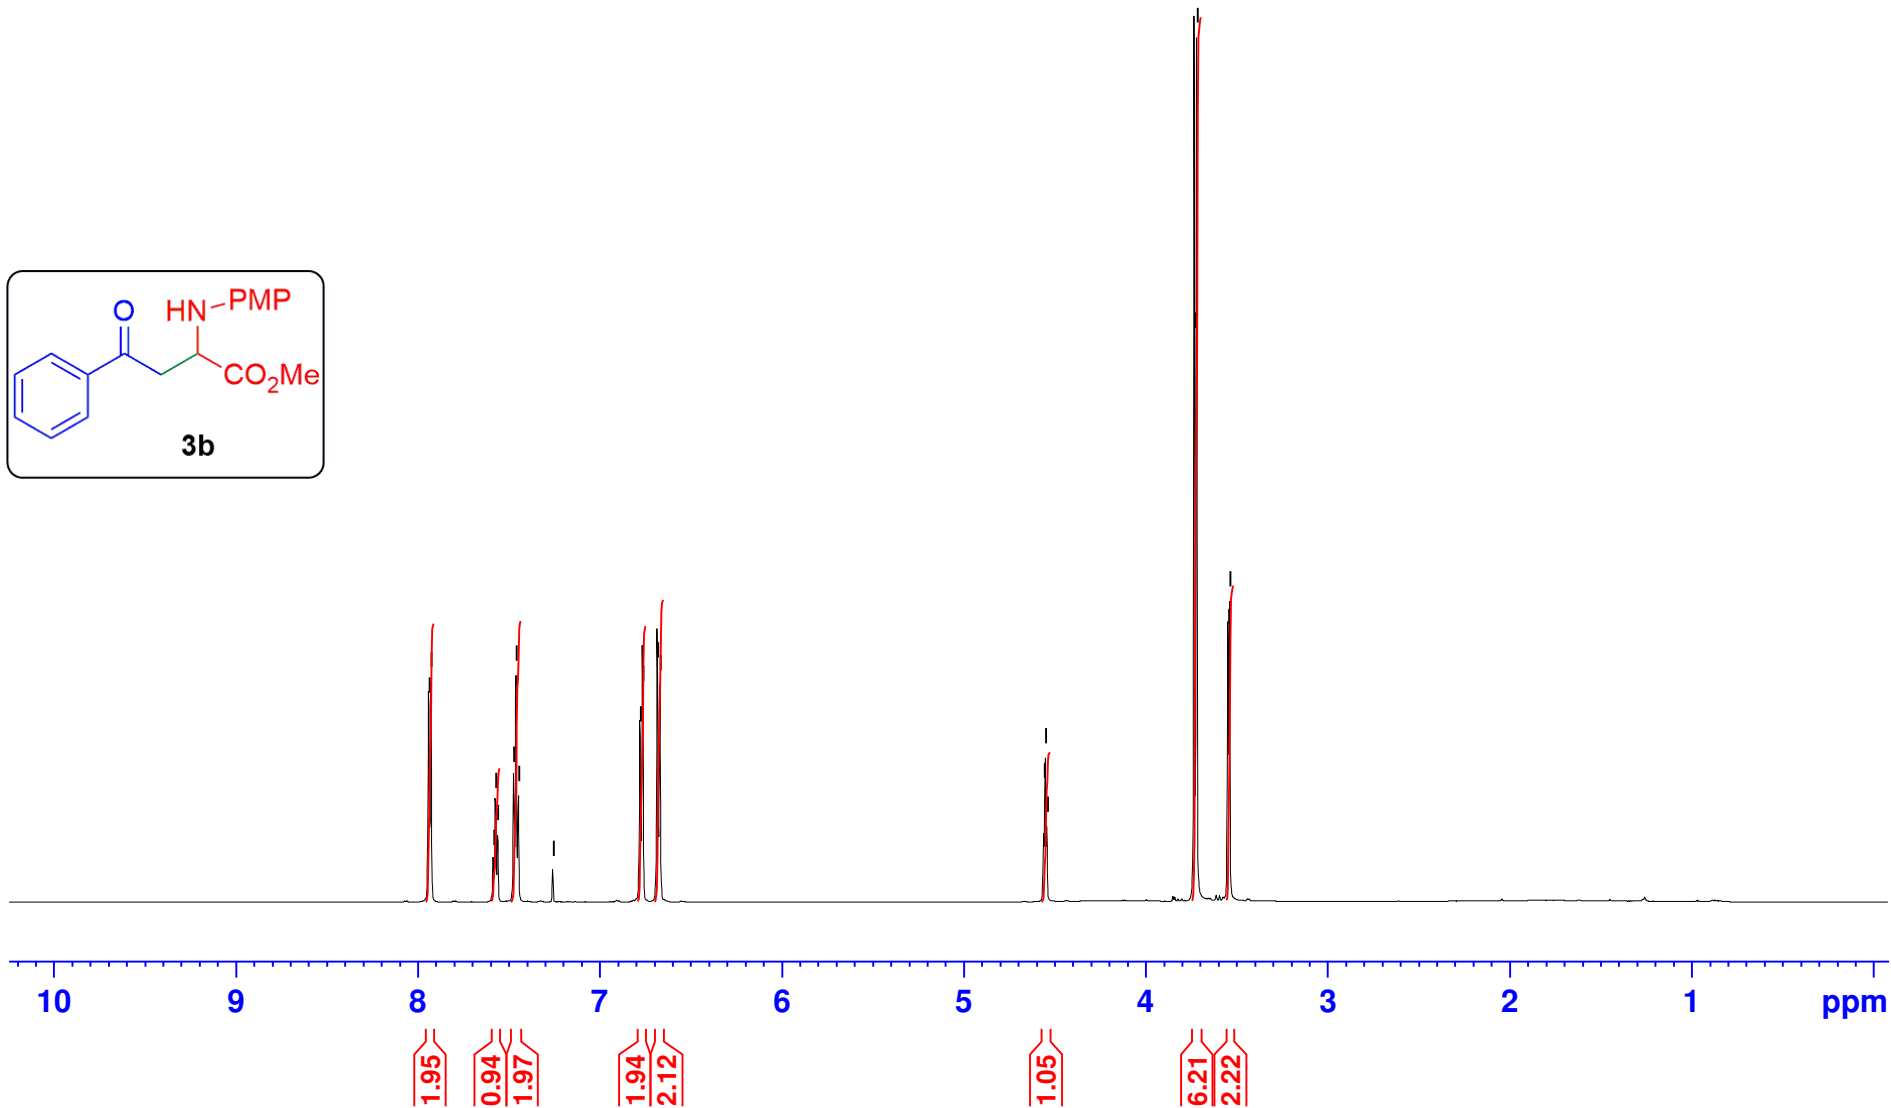

<sup>13</sup>C NMR, 201.2 MHz, CDCl<sub>3</sub>

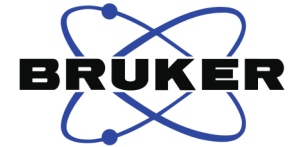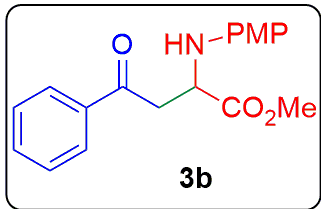

— 197.392

— 173.752

— 153.037

< 140.527

< 136.407

— 133.557

< 128.709

< 128.148

< 115.678

< 114.901

CDCl<sub>3</sub>  
< 77.241  
< 77.083  
< 76.925

< 55.688

< 54.303

< 52.460

— 41.137

Current Data Parameters  
NAME harc-RC-1870-13C-15Jan21  
EXPNO 1  
PROCNO 1

F2 - Acquisition Parameters  
Date\_ 20210115  
Time 15.46 h  
INSTRUM spect  
PROBHD 244909\_0011 (C  
PULPROG zgdc  
TD 16384  
SOLVENT CDCl3  
NS 332  
DS 4  
SWH 48543.688 Hz  
FIDRES 5.925743 Hz  
AQ 0.1687552 sec  
RG 71.8  
DW 10.300 usec  
DE 18.00 usec  
TE 298.0 K  
D1 3.0000000 sec  
D11 0.03000000 sec  
TDO 1  
SF01 201.1878208 MHz  
NUC1 13C  
P1 15.00 usec  
PLW1 141.03999329 W  
SF02 800.0332001 MHz  
NUC2 1H  
PCPD2 waltz16  
PCPD2 60.00 usec  
PLW2 10.18999958 W  
PLW12 0.16679481 W

F2 - Processing parameters  
SI 16384  
SF 201.1677040 MHz  
WDW EM  
SSB 0  
LB 5.00 Hz  
GB 0  
PC 1.40

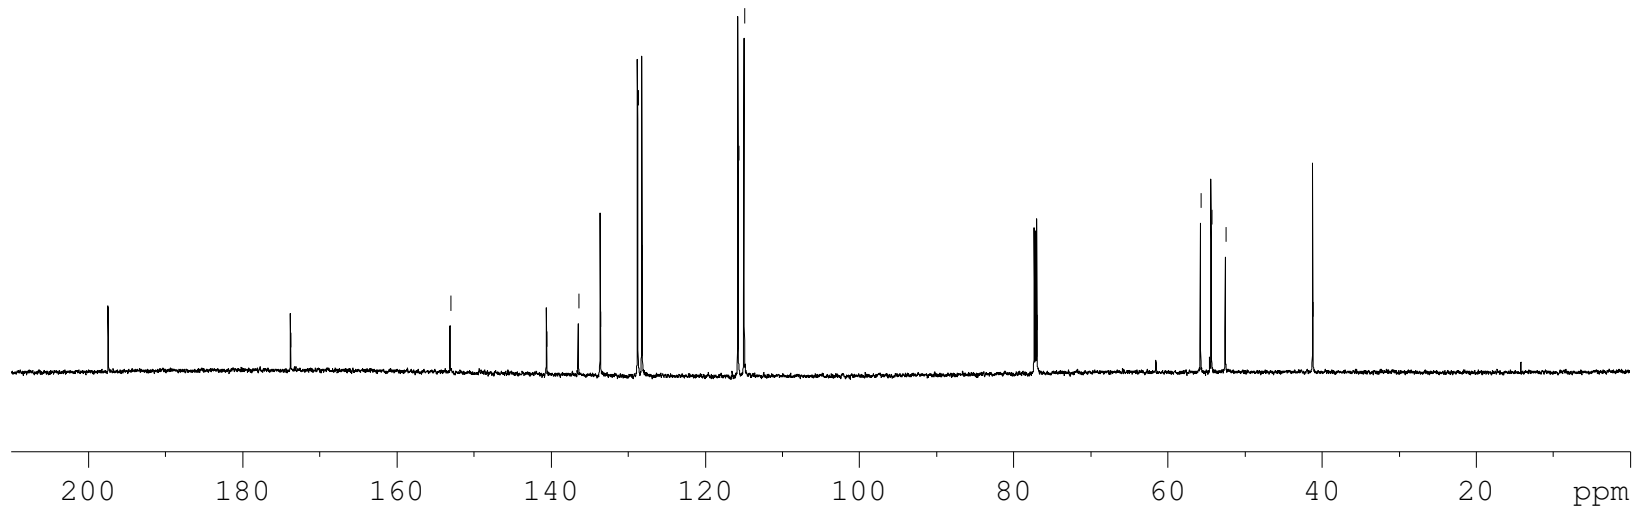

<sup>1</sup>H NMR, 600 MHz, CDCl<sub>3</sub>

CDCl<sub>3</sub>

7.793  
7.780  
7.603  
7.589  
7.256  
6.775  
6.761  
6.688  
6.674

4.526  
4.517  
4.508  
4.190  
4.178  
4.166  
4.155  
3.730  
3.483  
3.474

1.210  
1.198  
1.186

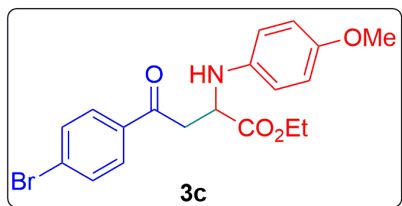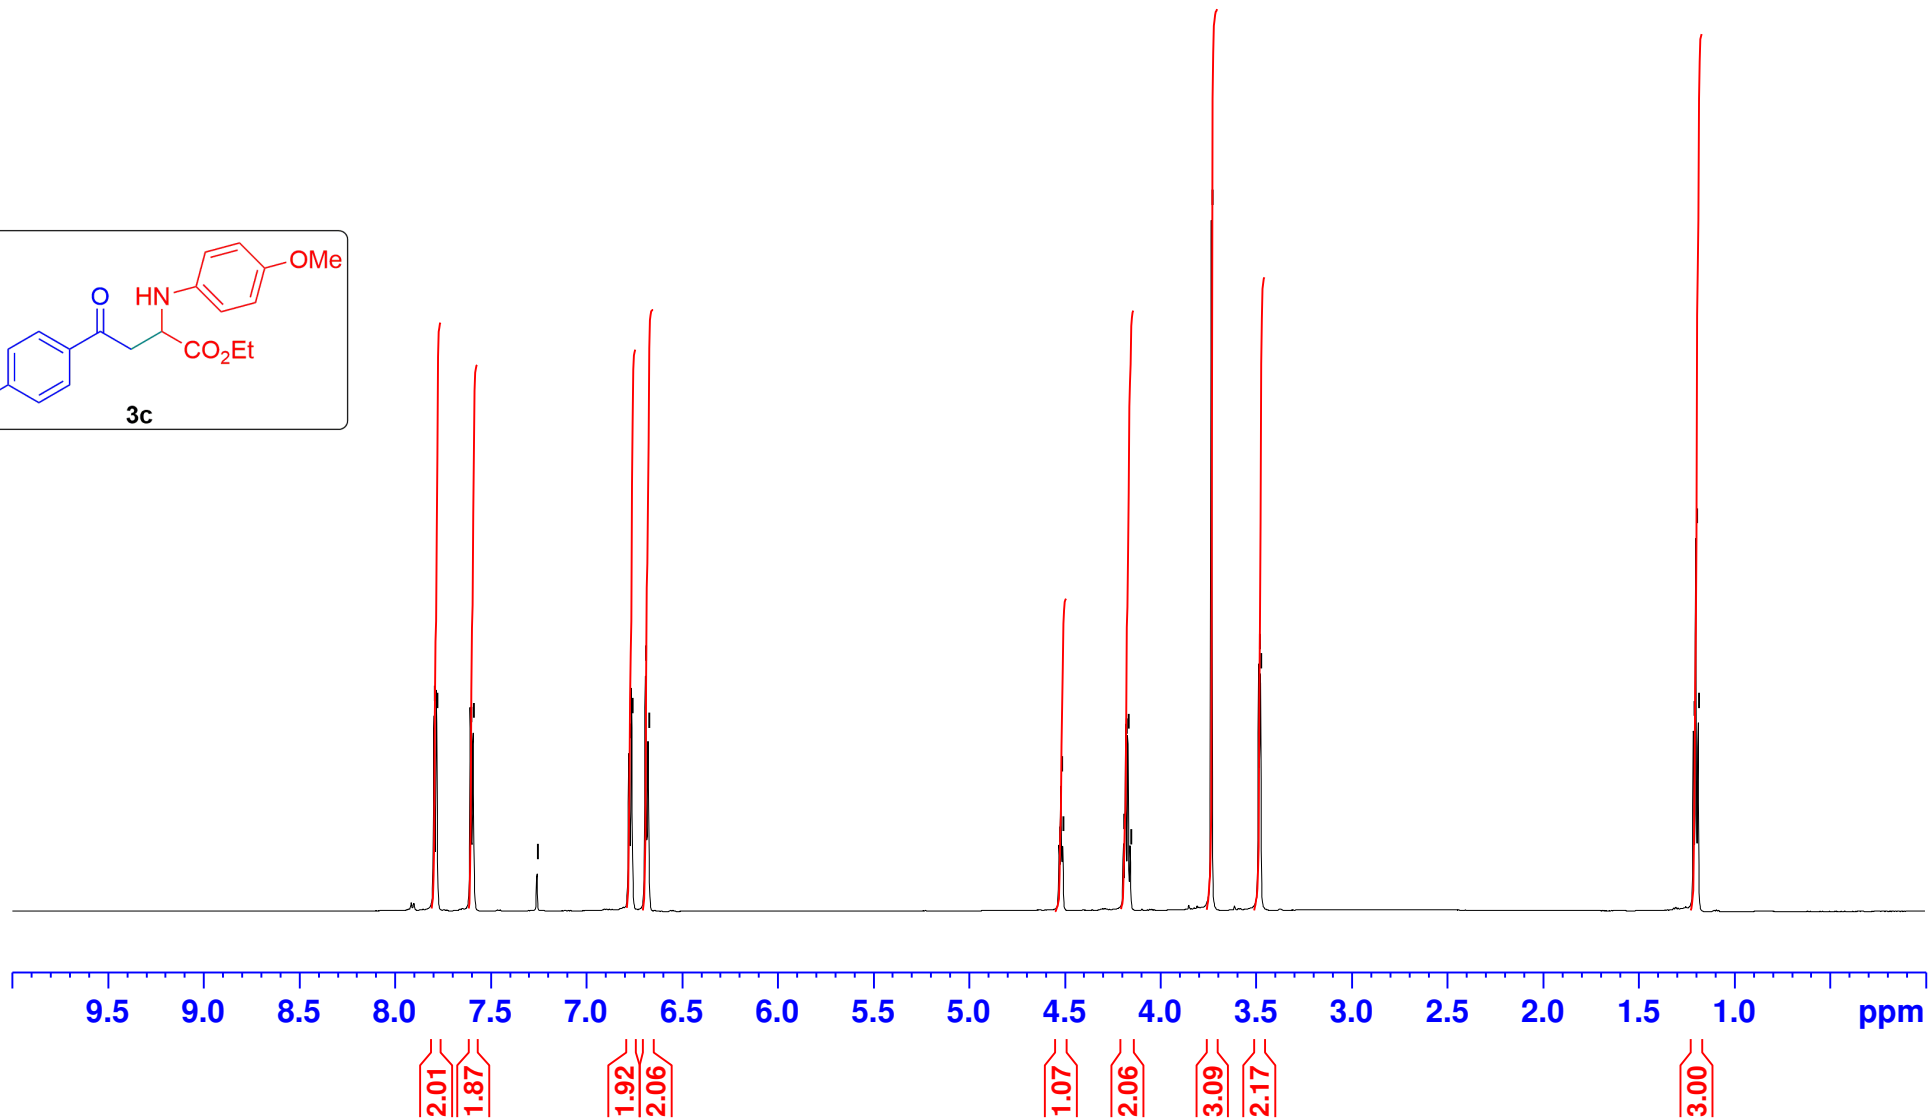

<sup>13</sup>C NMR, 201.2 MHz, CDCl<sub>3</sub>

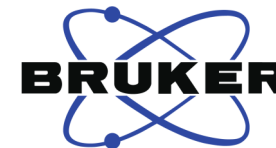

Current Data Parameters  
NAME barc-RC-2106-13C-2July21  
EXPNO 1  
PROCNO 1

F2 - Acquisition Parameters  
Date\_ 20210702  
Time\_ 14.33 h  
INSTRUM spect  
PROBHD Z555801\_0012 (  
PULPROG zgdc  
TD 16384  
SOLVENT CDCl3  
NS 613  
DS 4  
SWH 48543.688 Hz  
FIDRES 5.925743 Hz  
AQ 0.1687552 sec  
RG 71.8  
DW 10.300 usec  
DE 6.50 usec  
TE 298.3 K  
D1 3.0000000 sec  
D11 0.03000000 sec  
TD0 1  
SFO1 201.1878208 MHz  
NUC1 13C  
P1 8.00 usec  
PLW1 312.79998779 W  
SFO2 800.0332001 MHz  
NUC2 1H  
CPDPRG[2] waltz16  
PCPD2 60.00 usec  
PLW2 13.00000000 W  
PLW12 0.29249999 W

F2 - Processing parameters  
SI 16384  
SF 201.1677138 MHz  
WDW EM  
SSB 0  
LB 5.00 Hz  
GB 0  
PC 1.40

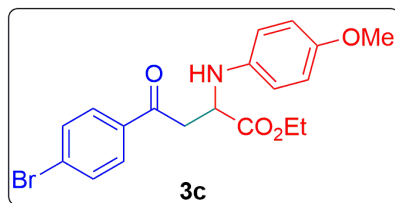

—196.385  
—172.962  
—153.129  
140.289  
135.187  
131.979  
129.594  
128.713  
115.846  
114.838  
CDCl<sub>3</sub>  
77.148  
76.990  
76.832  
61.505  
55.649  
54.522  
40.960  
—14.057

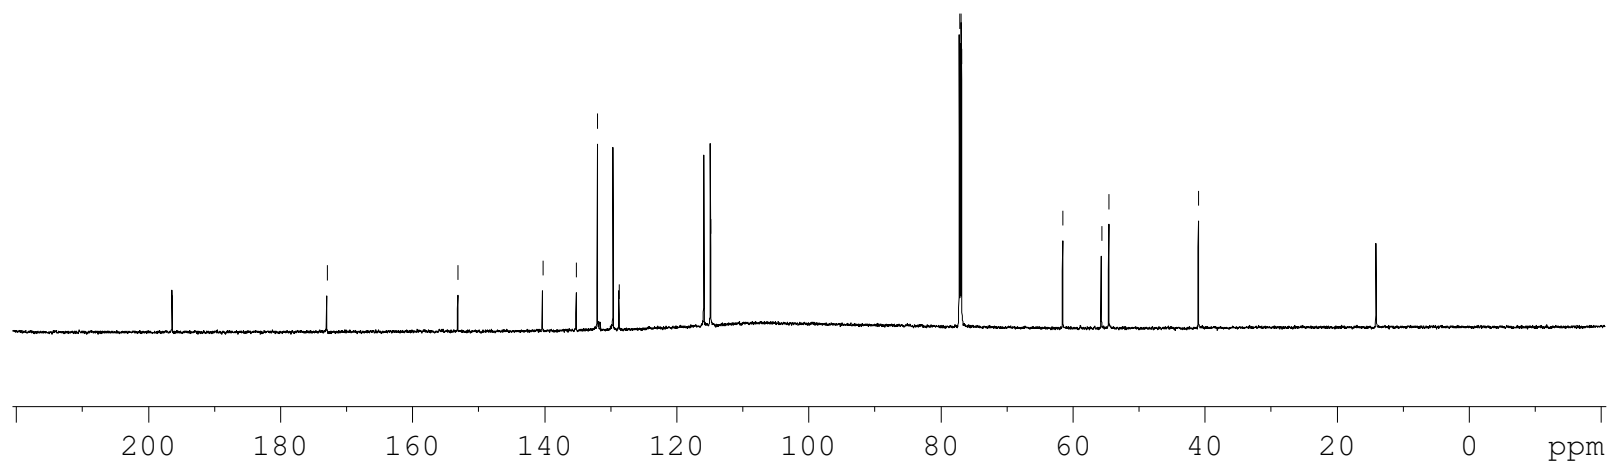

<sup>1</sup>H NMR, 600 MHz, CDCl<sub>3</sub>

CDCl<sub>3</sub>

7.873  
7.860  
7.435  
7.421  
7.256  
6.775  
6.761  
6.683  
6.669

4.526  
4.517  
4.508  
4.190  
4.179  
4.167  
4.155  
3.730  
3.486  
3.477

1.211  
1.198  
1.187

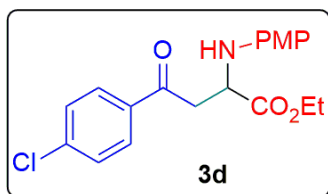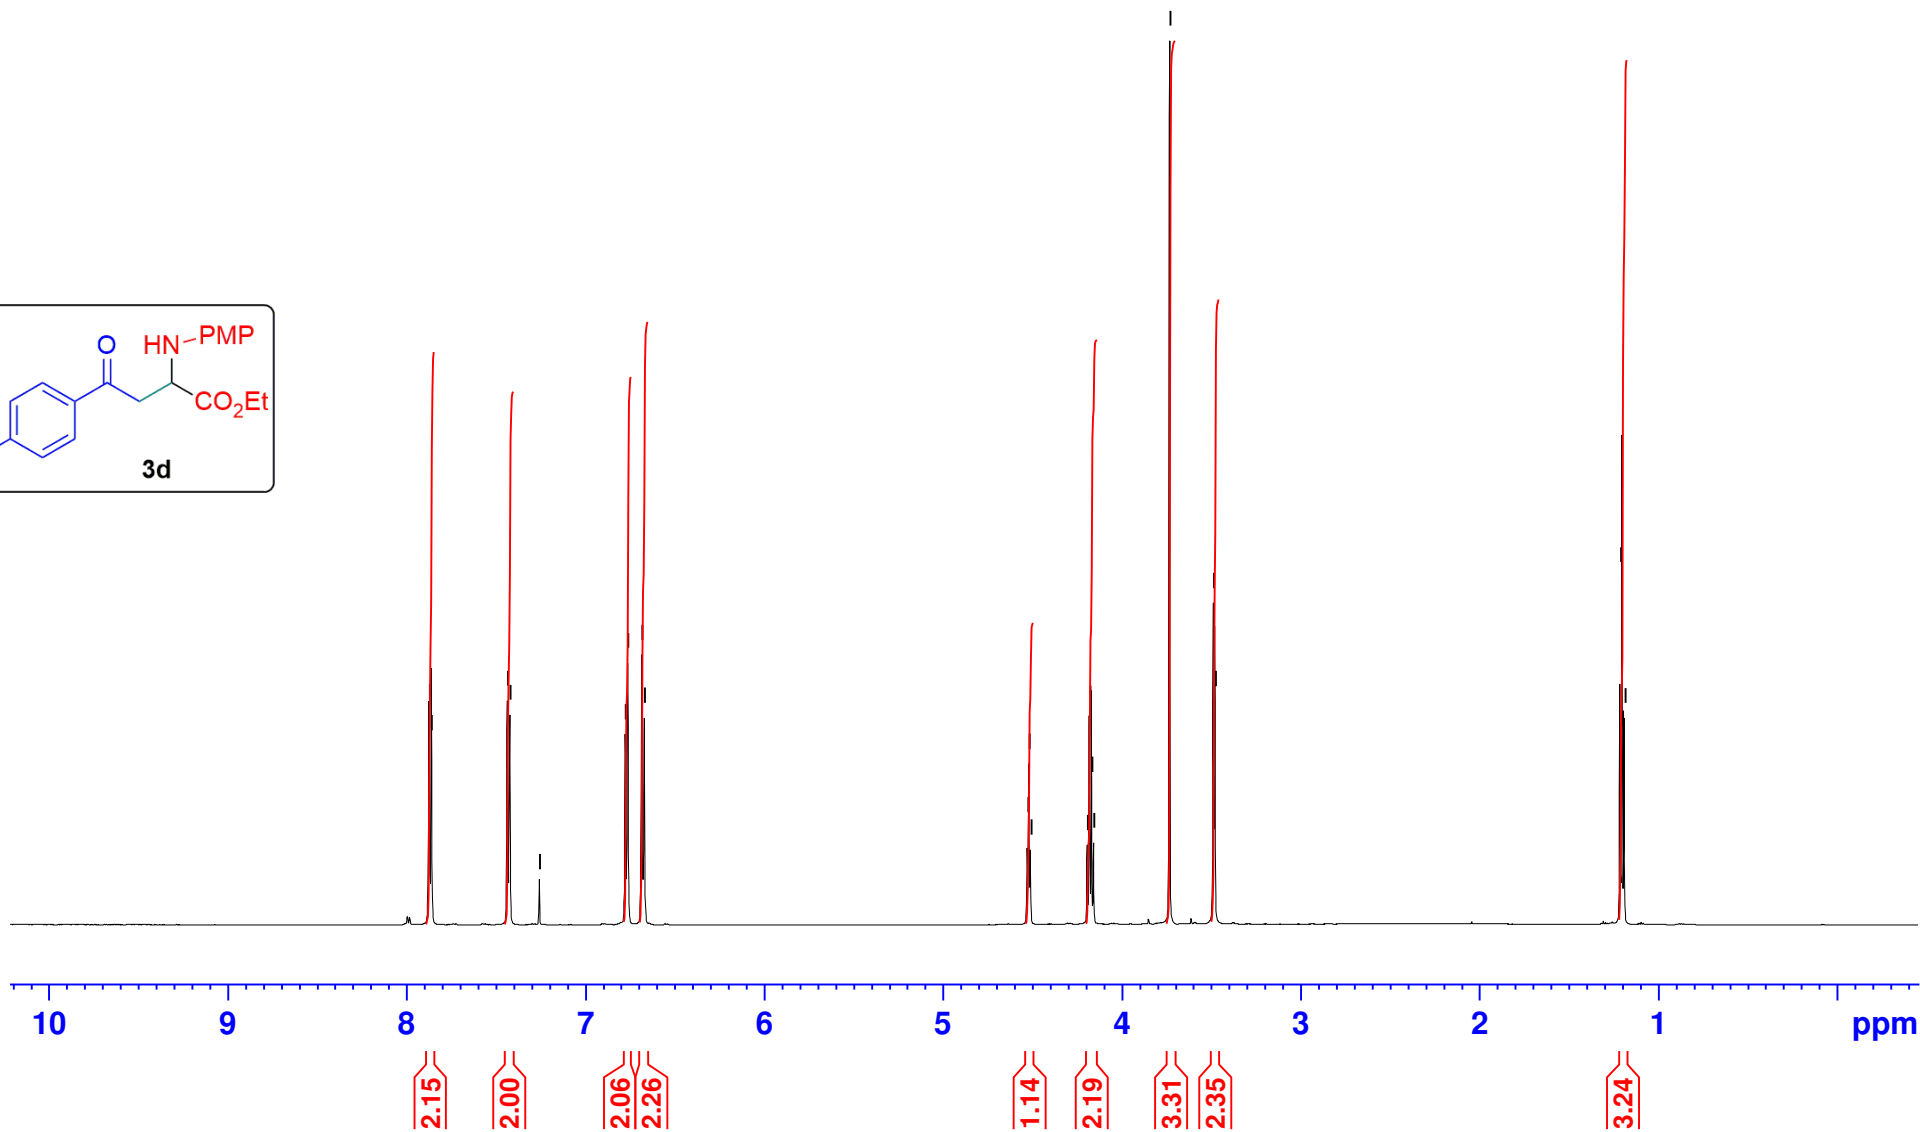

<sup>13</sup>C NMR, 201.2 MHz, CDCl<sub>3</sub>

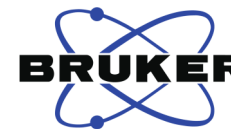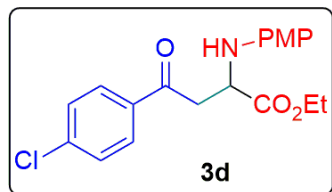

— 196.230  
— 173.058  
— 153.090  
140.475  
139.991  
134.842  
129.552  
129.022  
115.780  
114.877  
**CDCl<sub>3</sub>**  
77.218  
77.059  
76.899  
61.521  
55.688  
54.501  
— 41.051  
— 14.110

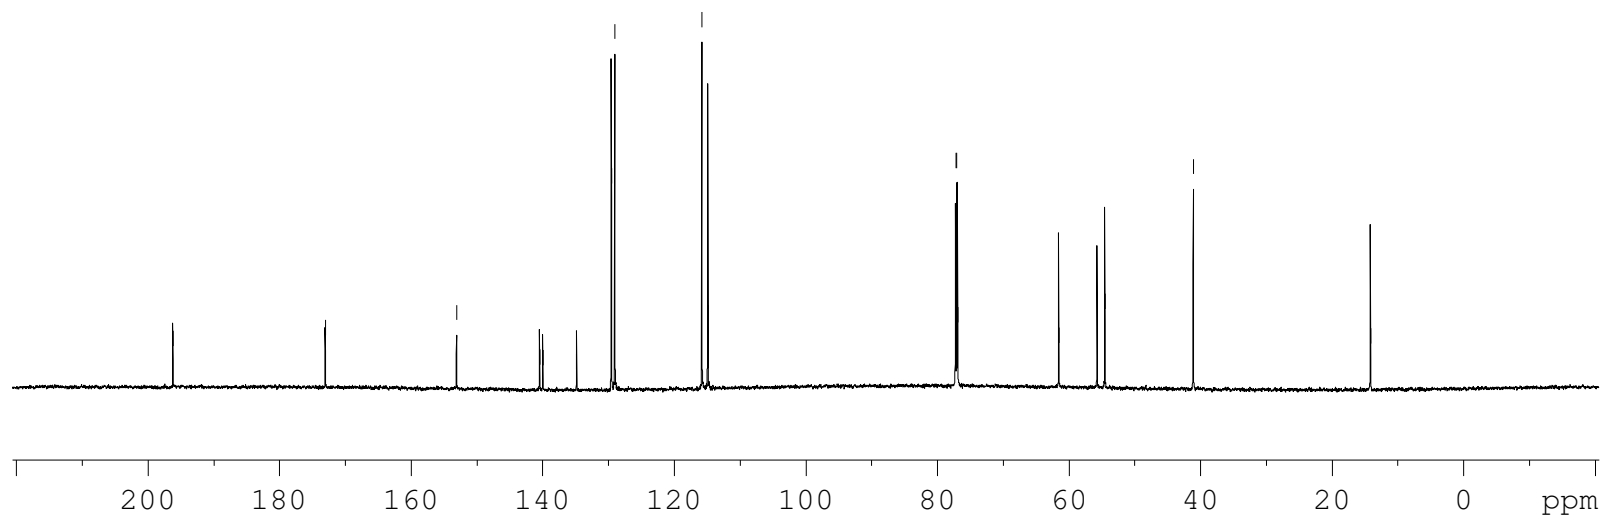

Current Data Parameters  
NAME barc-RC-2000-13C-24Jan21  
EXPNO 1  
PROCNO 1

F2 - Acquisition Parameters  
Date\_ 20210224  
Time 11.52 h  
INSTRUM spect  
PROBHD 244909\_0011 (C  
PULPROG zgdc  
TD 16384  
SOLVENT CDCl3  
NS 100  
DS 4  
SWH 48543.688 Hz  
FIDRES 5.925743 Hz  
AQ 0.1687552 sec  
RG 71.8  
DW 10.300 usec  
DE 18.00 usec  
TE 298.0 K  
D1 3.0000000 sec  
D11 0.0300000 sec  
TD0 1  
SF01 201.1878208 MHz  
NUC1 13C  
P1 15.00 usec  
PLW1 141.03999329 W  
SF02 800.0332001 MHz  
NUC2 1H  
CPDPRG2 waltz16  
PCPD2 60.00 usec  
PLW2 10.18999958 W  
PLW12 0.16679481 W

F2 - Processing parameters  
SI 16384  
SF 201.1677040 MHz  
WDW EM  
SSB 0  
LB 5.00 Hz  
GB 0  
PC 1.40



<sup>1</sup>H NMR, 600 MHz, CDCl<sub>3</sub>

CDCl<sub>3</sub>

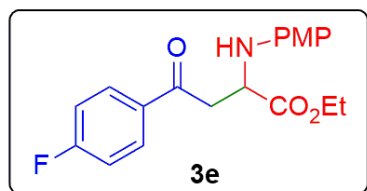

7.970  
7.957  
7.947  
7.256  
7.137  
7.123  
7.109  
6.774  
6.760  
6.683  
6.668

4.526  
4.518  
4.509  
4.191  
4.179  
4.167  
4.155  
3.729  
3.491  
3.482

1.210  
1.198  
1.186

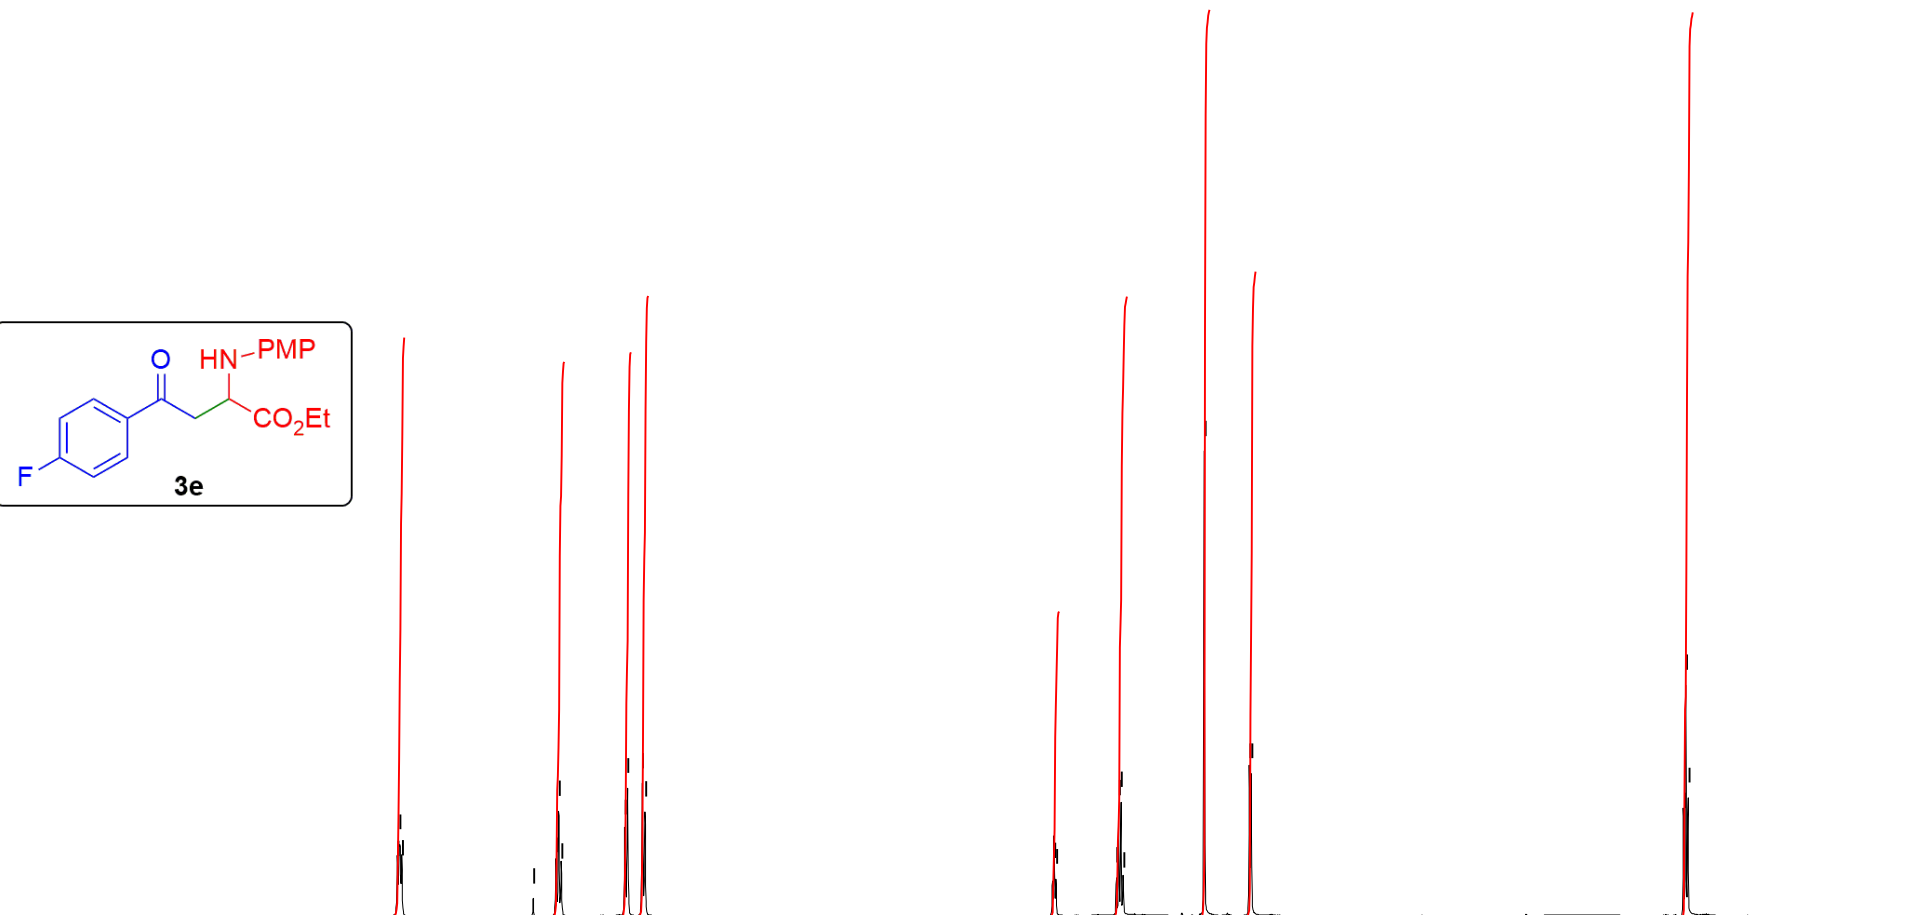

9.5 9.0 8.5 8.0 7.5 7.0 6.5 6.0 5.5 5.0 4.5 4.0 3.5 3.0 2.5 2.0 1.5 1.0 ppm

2.00

1.92

1.95

2.14

1.06

2.14

3.12

2.22

3.12

<sup>13</sup>C NMR, 201.2 MHz, CDCl<sub>3</sub>

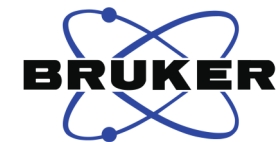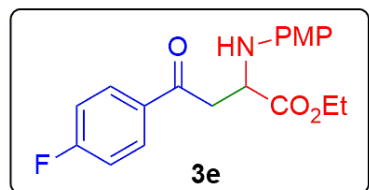

— 195.814

— 173.109  
— 166.597  
— 165.327

— 153.075

— 140.507  
— 132.985  
— 130.844  
— 130.801

— 115.883  
— 115.771  
— 114.870

CDCl<sub>3</sub>  
— 77.208  
— 77.049  
— 76.891

— 61.495  
— 55.688  
— 54.523

— 40.993

— 14.101

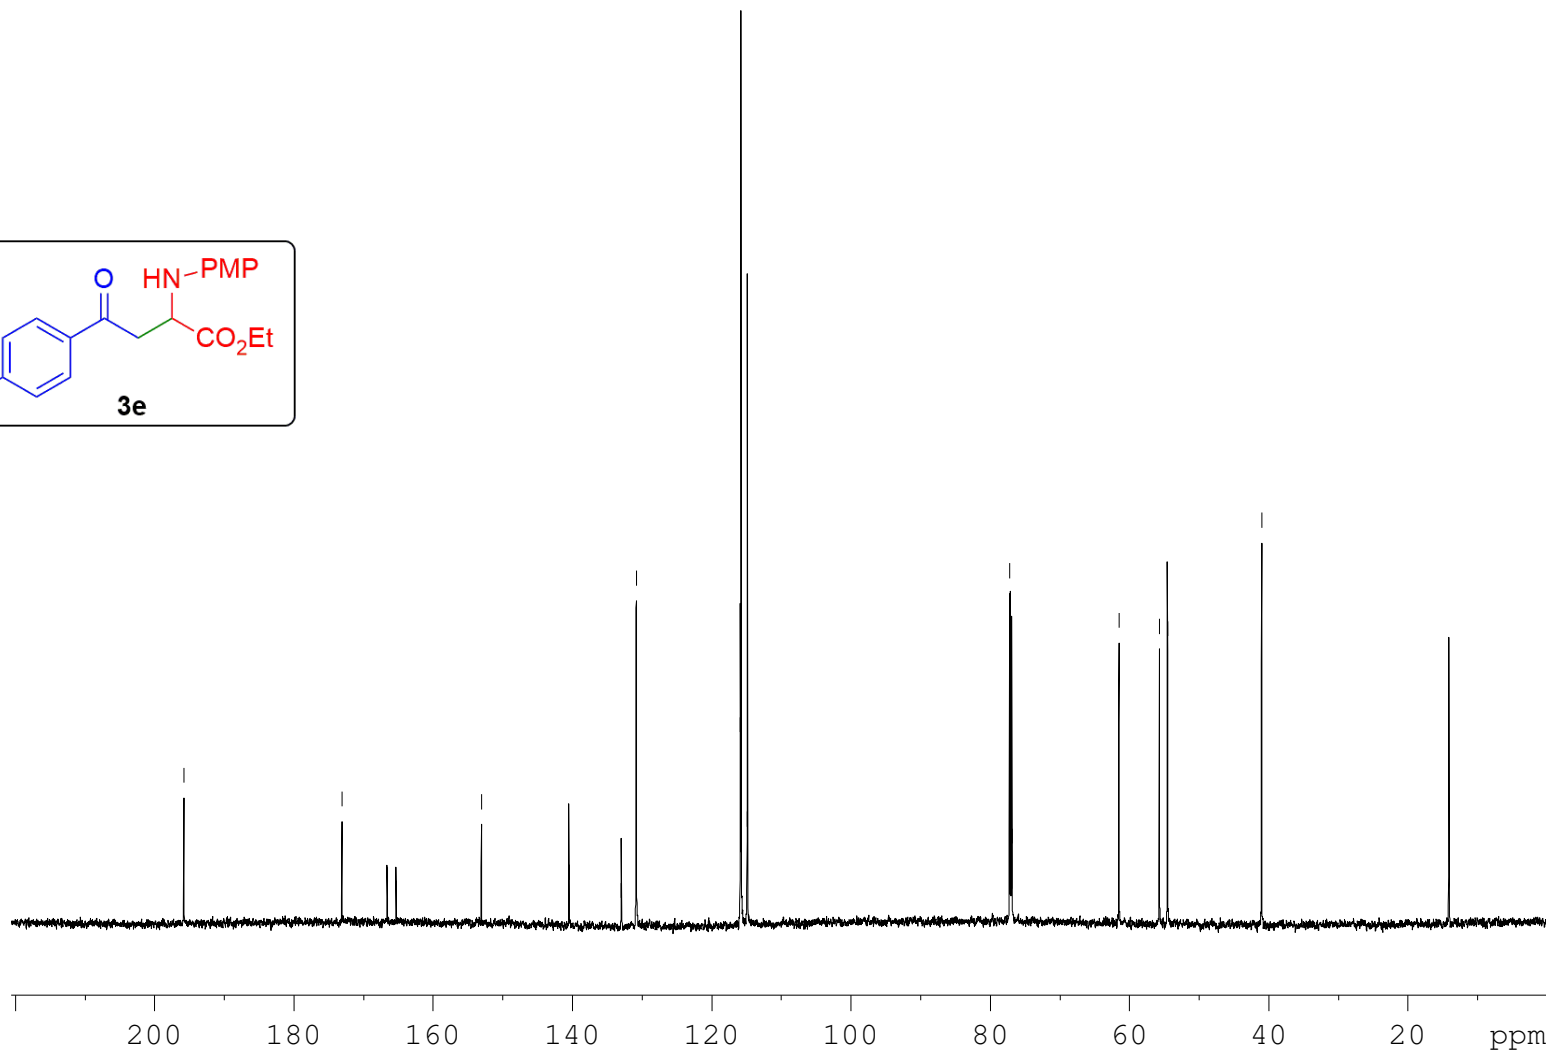

Current Data Parameters  
NAME barc-RC-2018-13C-24Jan21  
EXPNO 1  
PROCNO 1

F2 - Acquisition Parameters  
Date\_ 20210224  
Time 12.34 h  
INSTRUM spect  
PROBHD Z44909\_0011 (C  
PULPROG zgdc  
TD 16384  
SOLVENT CDCl3  
NS 217  
DS 4  
SWH 48543.688 Hz  
FIDRES 5.925743 Hz  
AQ 0.1687552 sec  
RG 71.8  
DW 10.300 usec  
DE 18.00 usec  
TE 298.0 K  
D1 3.0000000 sec  
D11 0.0300000 sec  
TD0 1  
SFO1 201.1878208 MHz  
NUC1 13C  
P1 15.00 usec  
PLW1 141.03999329 W  
SFO2 800.0332001 MHz  
NUC2 1H  
CPDPRG2 waltz16  
PCPD2 60.00 usec  
PLW2 10.18999958 W  
PLW12 0.16679481 W

F2 - Processing parameters  
SI 16384  
SF 201.1677040 MHz  
WDW EM  
SSB 0  
LB 5.00 Hz  
GB 0  
PC 1.40

<sup>1</sup>H NMR, 600 MHz, CDCl<sub>3</sub>

CDCl<sub>3</sub>

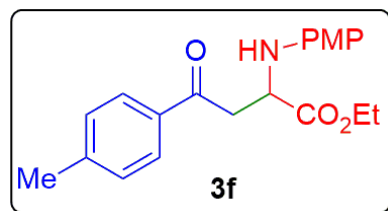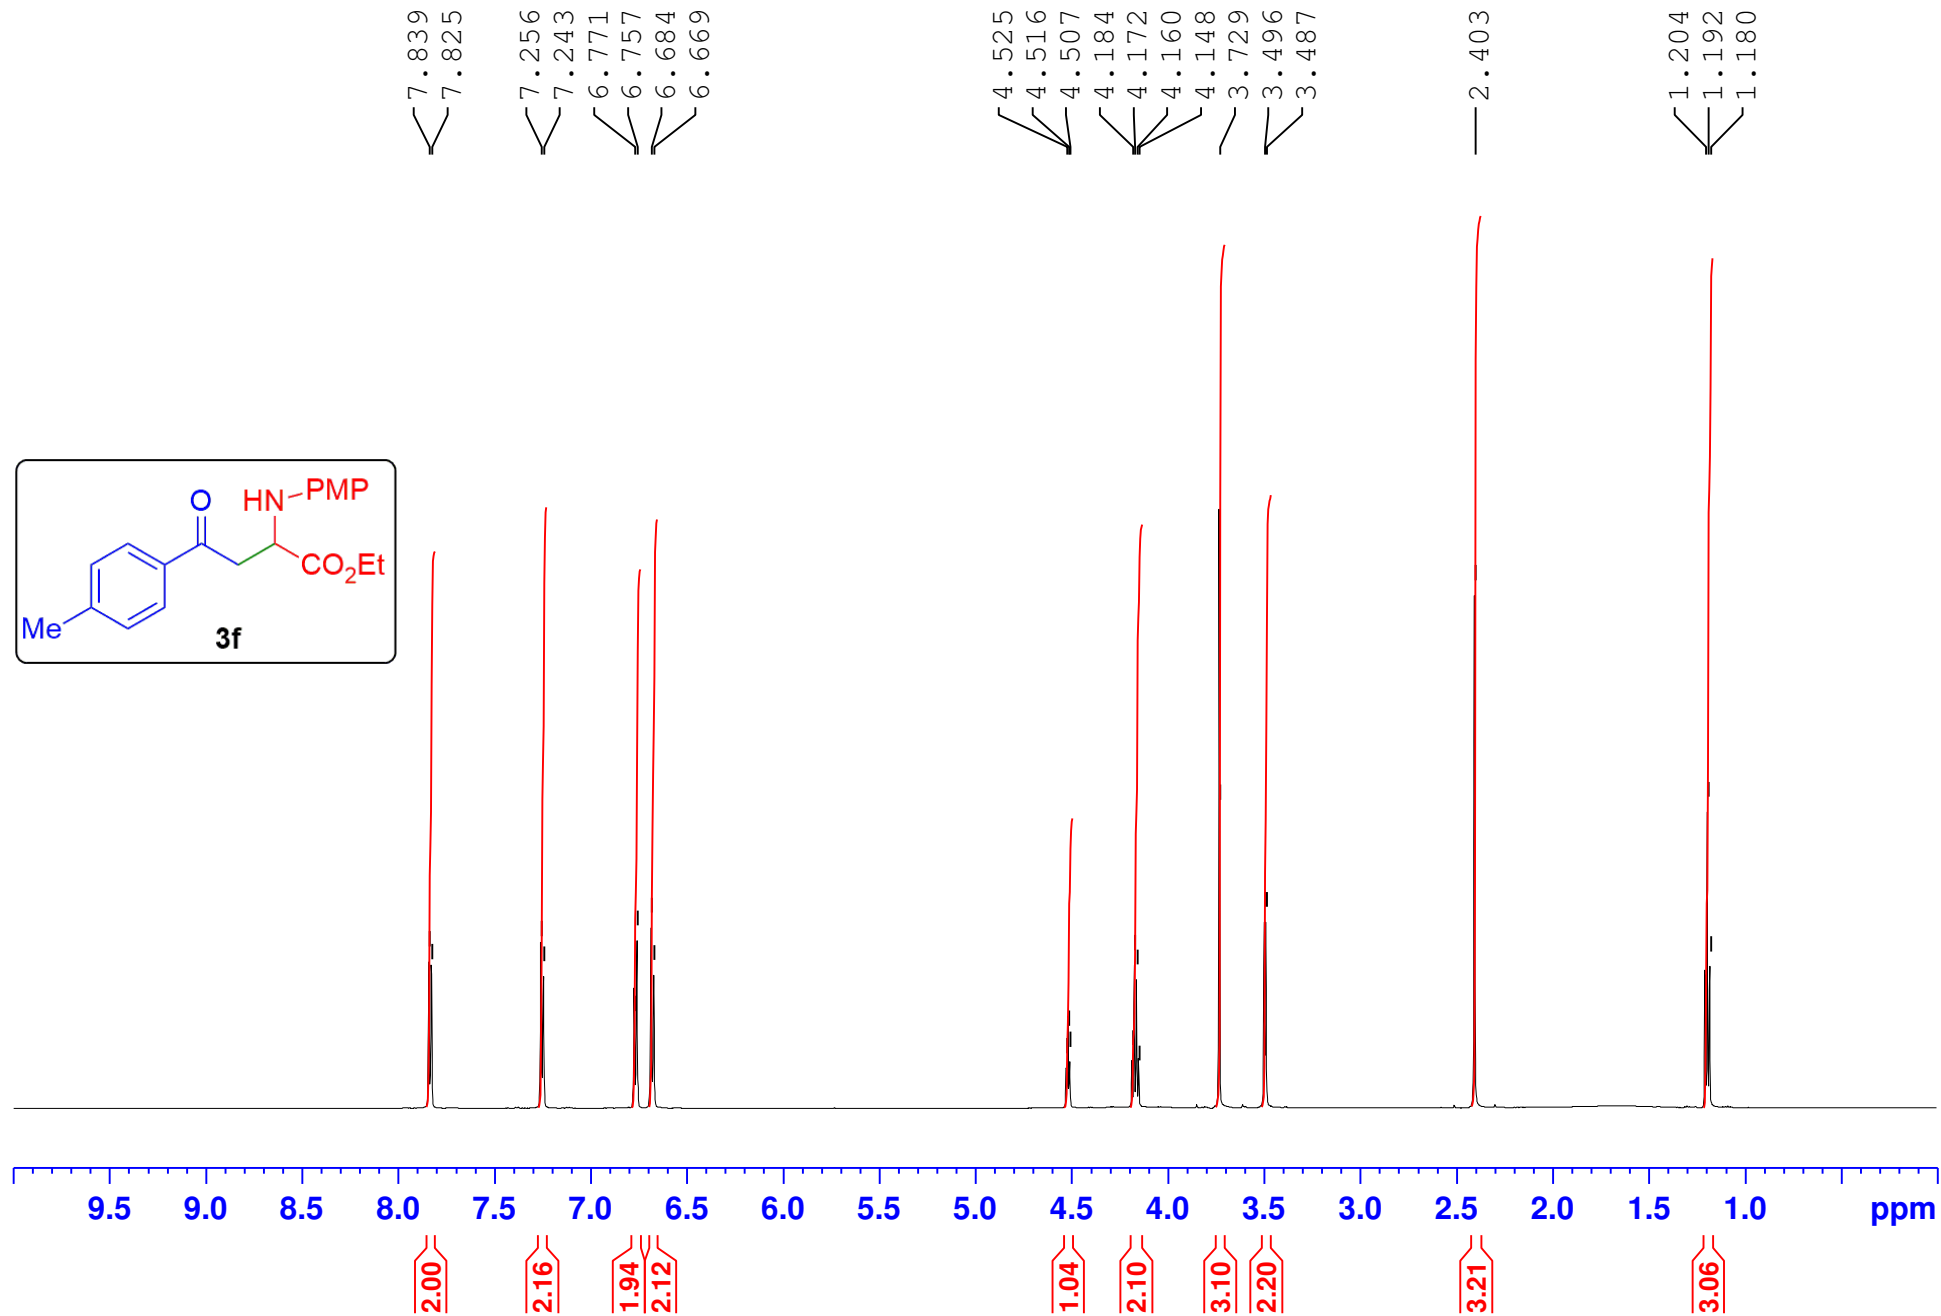

<sup>13</sup>C NMR, 201.2 MHz, CDCl<sub>3</sub>

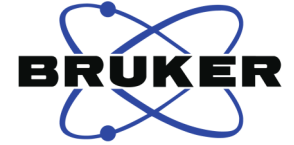

```
Current Data Parameters
NAME      barc-RC-2005-13C-24Jan21
EXPNO     1
PROCNO    1

F2 - Acquisition Parameters
Date_     20210224
Time      15.19 h
INSTRUM   spect
PROBHD    Z44909_0011 (C
PULPROG   zgpg
TD         16384
SOLVENT   CDCl3
NS         159
DS         4
SWH        48543.688 Hz
FIDRES     5.925743 Hz
AQ         0.1687532 sec
RG         71.8
DM         10.300 usec
DE         18.00 usec
TE         298.0 K
D1         3.0000000 sec
D11        0.03000000 sec
TDO        1
SFO1       201.1878208 MHz
NUC1        13C
P1         15.00 usec
PLW1       141.83999329 W
SFO2       800.0322001 MHz
NUC2        1H
CPDPRG2    waltz16
PCPD2      60.00 usec
PLW2       10.18999958 W
PLW12      0.16679481 W

F2 - Processing parameters
SI         16384
SF         201.1677040 MHz
WDW        EM
SSB        0
LB         0
GB         0
PC         1.40
```

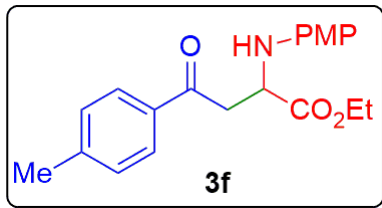

—197.395

—173.047

144.182  
136.516  
133.495  
129.848  
128.689  
128.148  
127.895  
—114.085

CDCl<sub>3</sub>  
77.232  
77.073  
76.913

—61.480

—53.567

—40.976

—20.424

—14.105

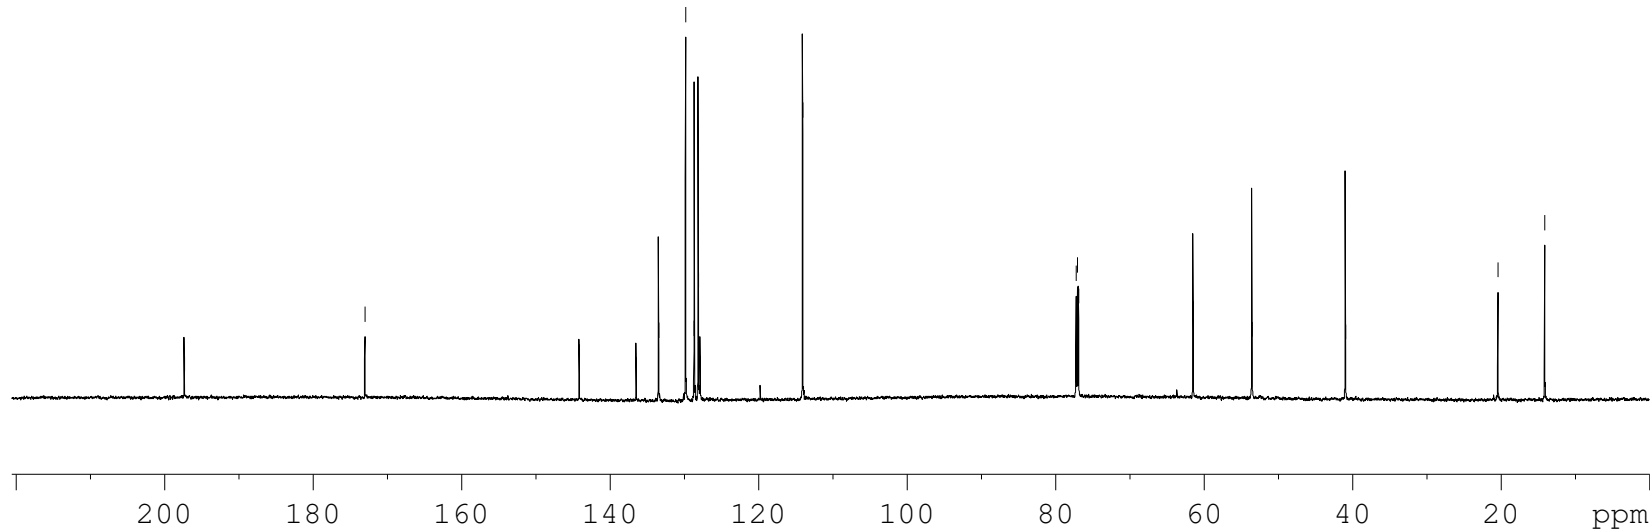

<sup>1</sup>H NMR, 600 MHz, CDCl<sub>3</sub>

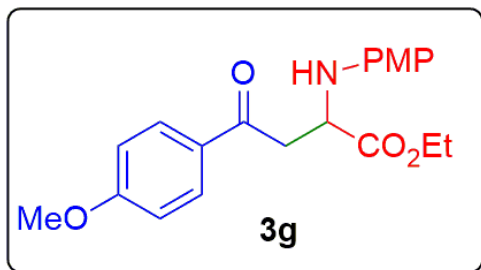

7.9202  
7.9153  
7.9117  
7.9038  
7.9002  
7.8956

7.2500  
6.9269  
6.9220  
6.9186  
6.9105  
6.9071  
6.9023  
6.7695  
6.7637  
6.7597  
6.7526  
6.7485  
6.7427  
6.7368  
6.6827  
6.6768  
6.6728  
6.6656  
6.6617

4.5103  
4.5012  
4.4922  
4.1758  
4.1639  
4.1521  
4.1402  
3.8523  
3.7208  
3.4687  
3.4594

1.1967  
1.1849  
1.1730

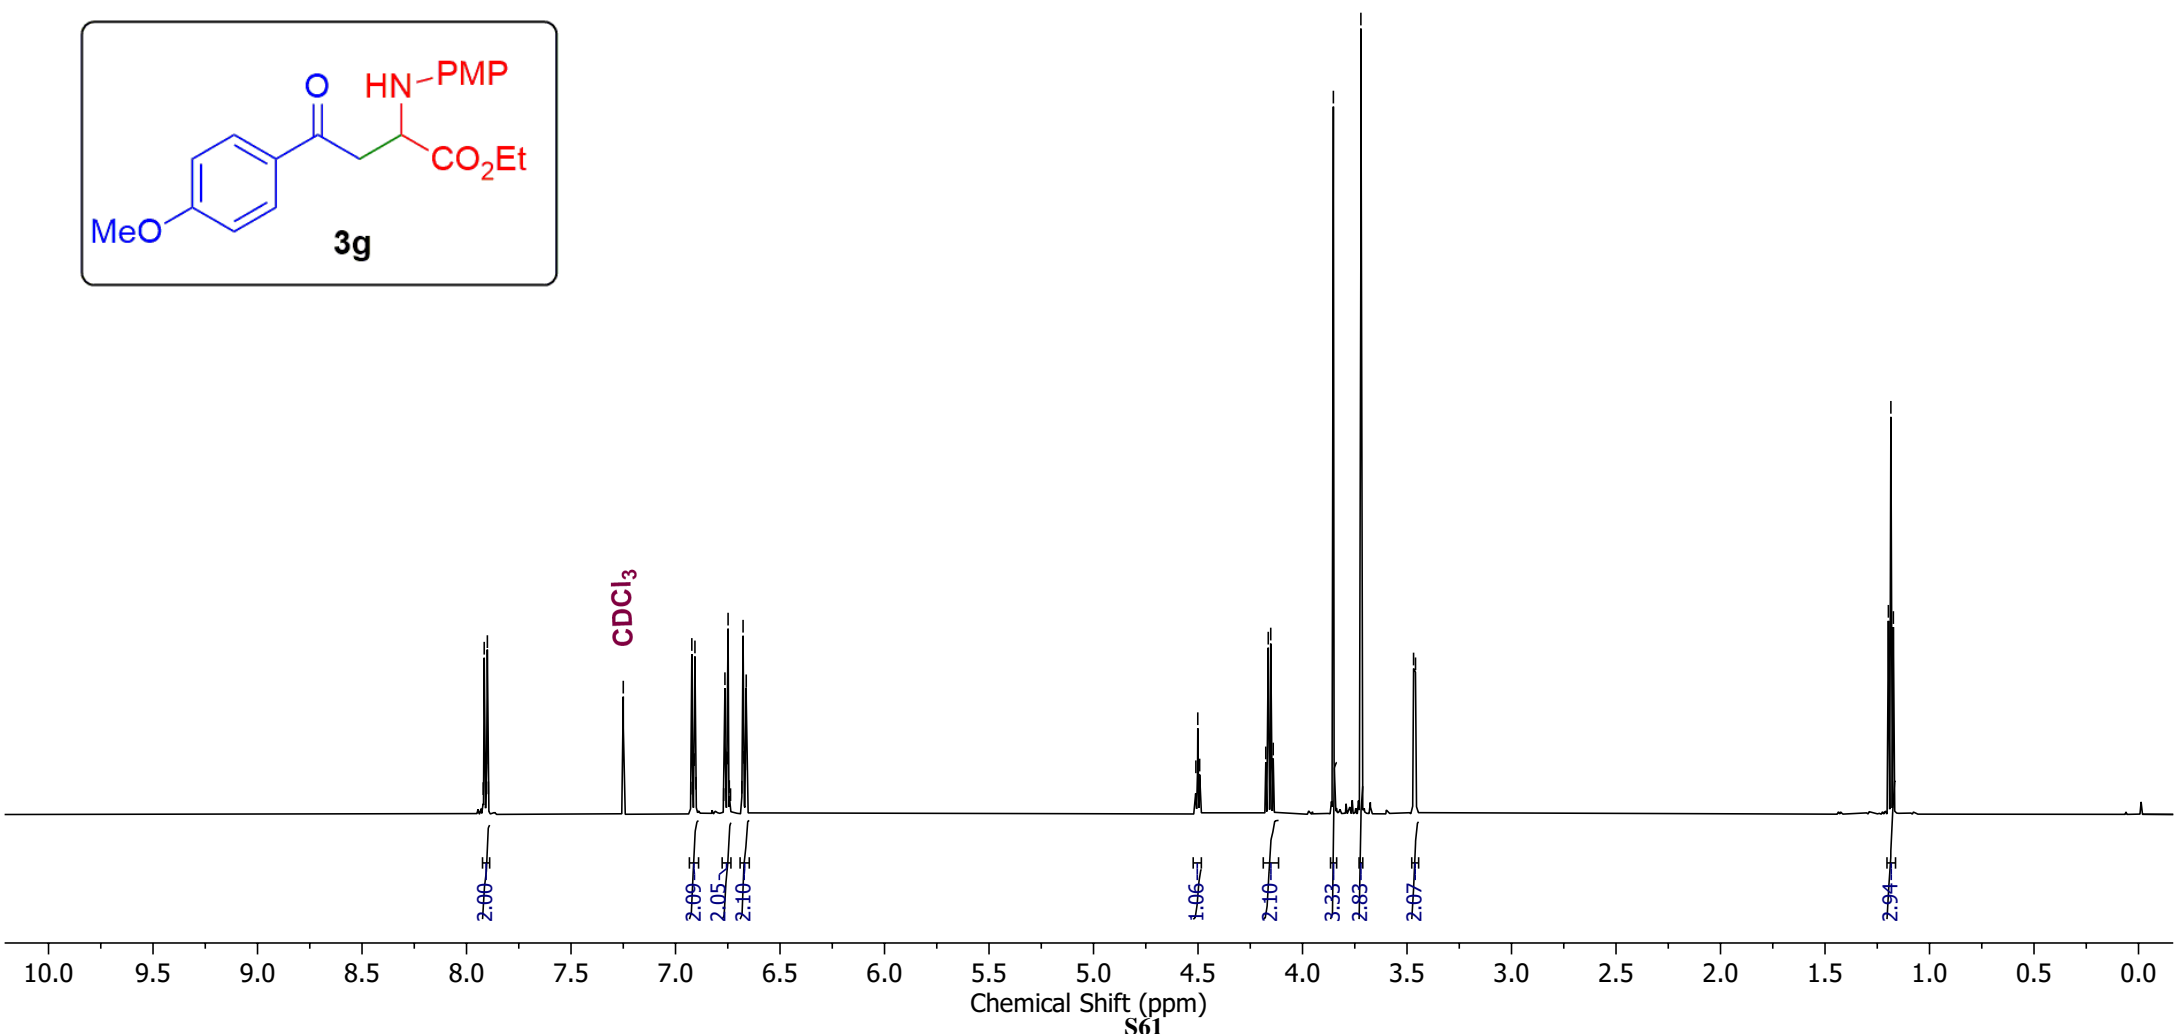

**<sup>13</sup>C NMR, 201.2 MHz, CDCl<sub>3</sub>**

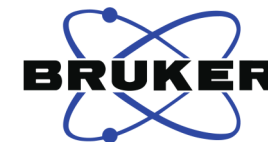

Current Data Parameters  
NAME barc-RC-2007-13C-24Jan21  
EXPNO 1  
PROCNO 1

F2 - Acquisition Parameters  
Date\_ 20210224  
Time 13.06 h  
INSTRUM spect  
PROBHD z44909\_0011 (C  
PULPROG zgdc  
TD 16384  
SOLVENT cdcl3  
NS 160  
DS 4  
SWH 48543.688 Hz  
FIDRES 5.925743 Hz  
AQ 0.1687552 sec  
RG 71.8  
DW 10.300 usec  
DE 18.00 usec  
TE 298.0 K  
D1 3.0000000 sec  
D11 0.0300000 sec  
TD0 1  
SFO1 201.1878208 MHz  
NUC1 13C  
P1 15.00 usec  
PLW1 141.03999329 W  
SFO2 800.0332001 MHz  
NUC2 1H  
CPDPRG2 waltz16  
PCPD2 60.00 usec  
PLW2 10.18999958 W  
PLW12 0.16679481 W

F2 - Processing parameters  
SI 16384  
SF 201.1677040 MHz  
WDW EM  
SSB 0  
LB 5.00 Hz  
GB 0  
PC 1.40

— 195.819  
— 173.333  
— 163.797  
— 152.957  
— 140.684  
— 130.468  
— 129.644  
— 115.711  
— 114.843  
— 113.825  
— 77.207 } CDCl<sub>3</sub>  
— 77.047 }  
— 76.889 }  
— 61.385  
— 55.699  
— 55.510  
— 54.589  
— 40.713  
— 14.109

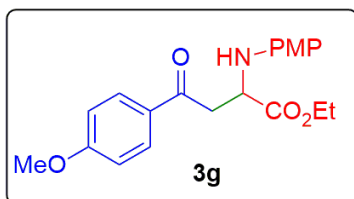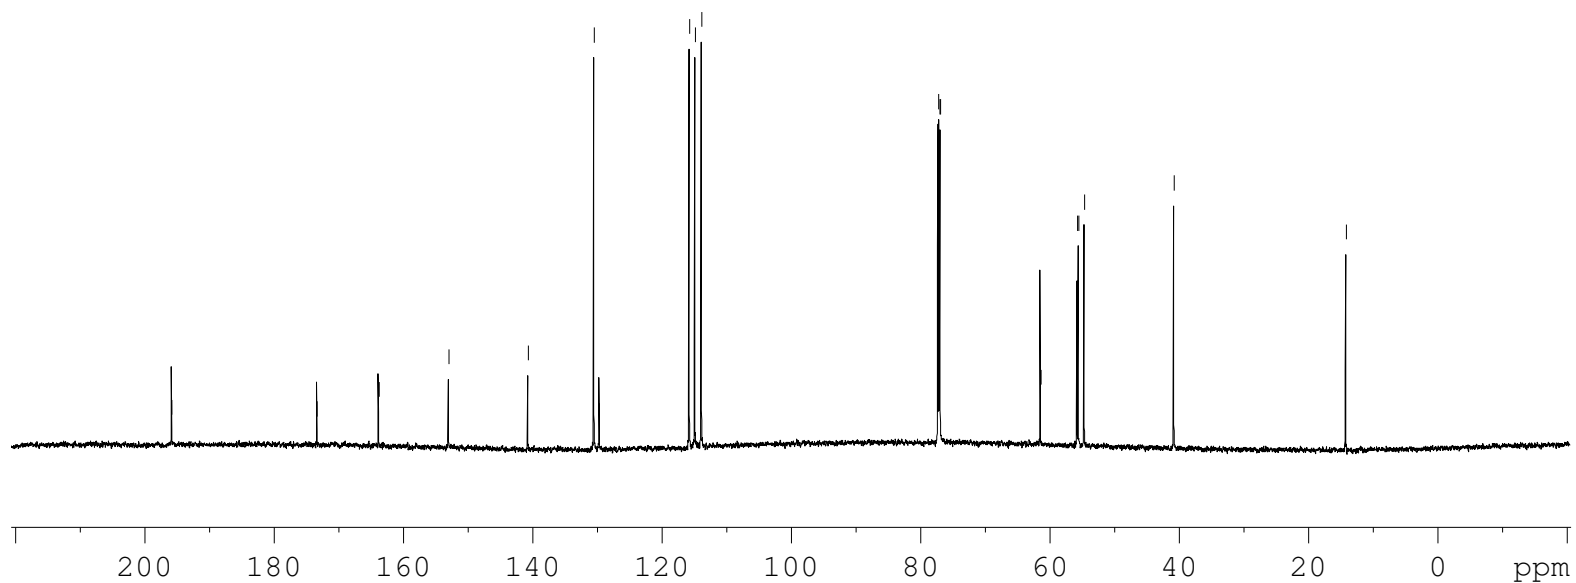

<sup>1</sup>H NMR, 600 MHz, CDCl<sub>3</sub>

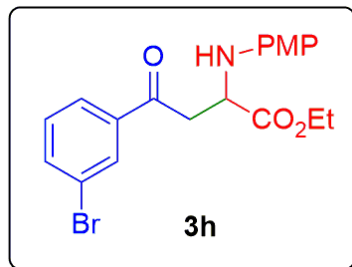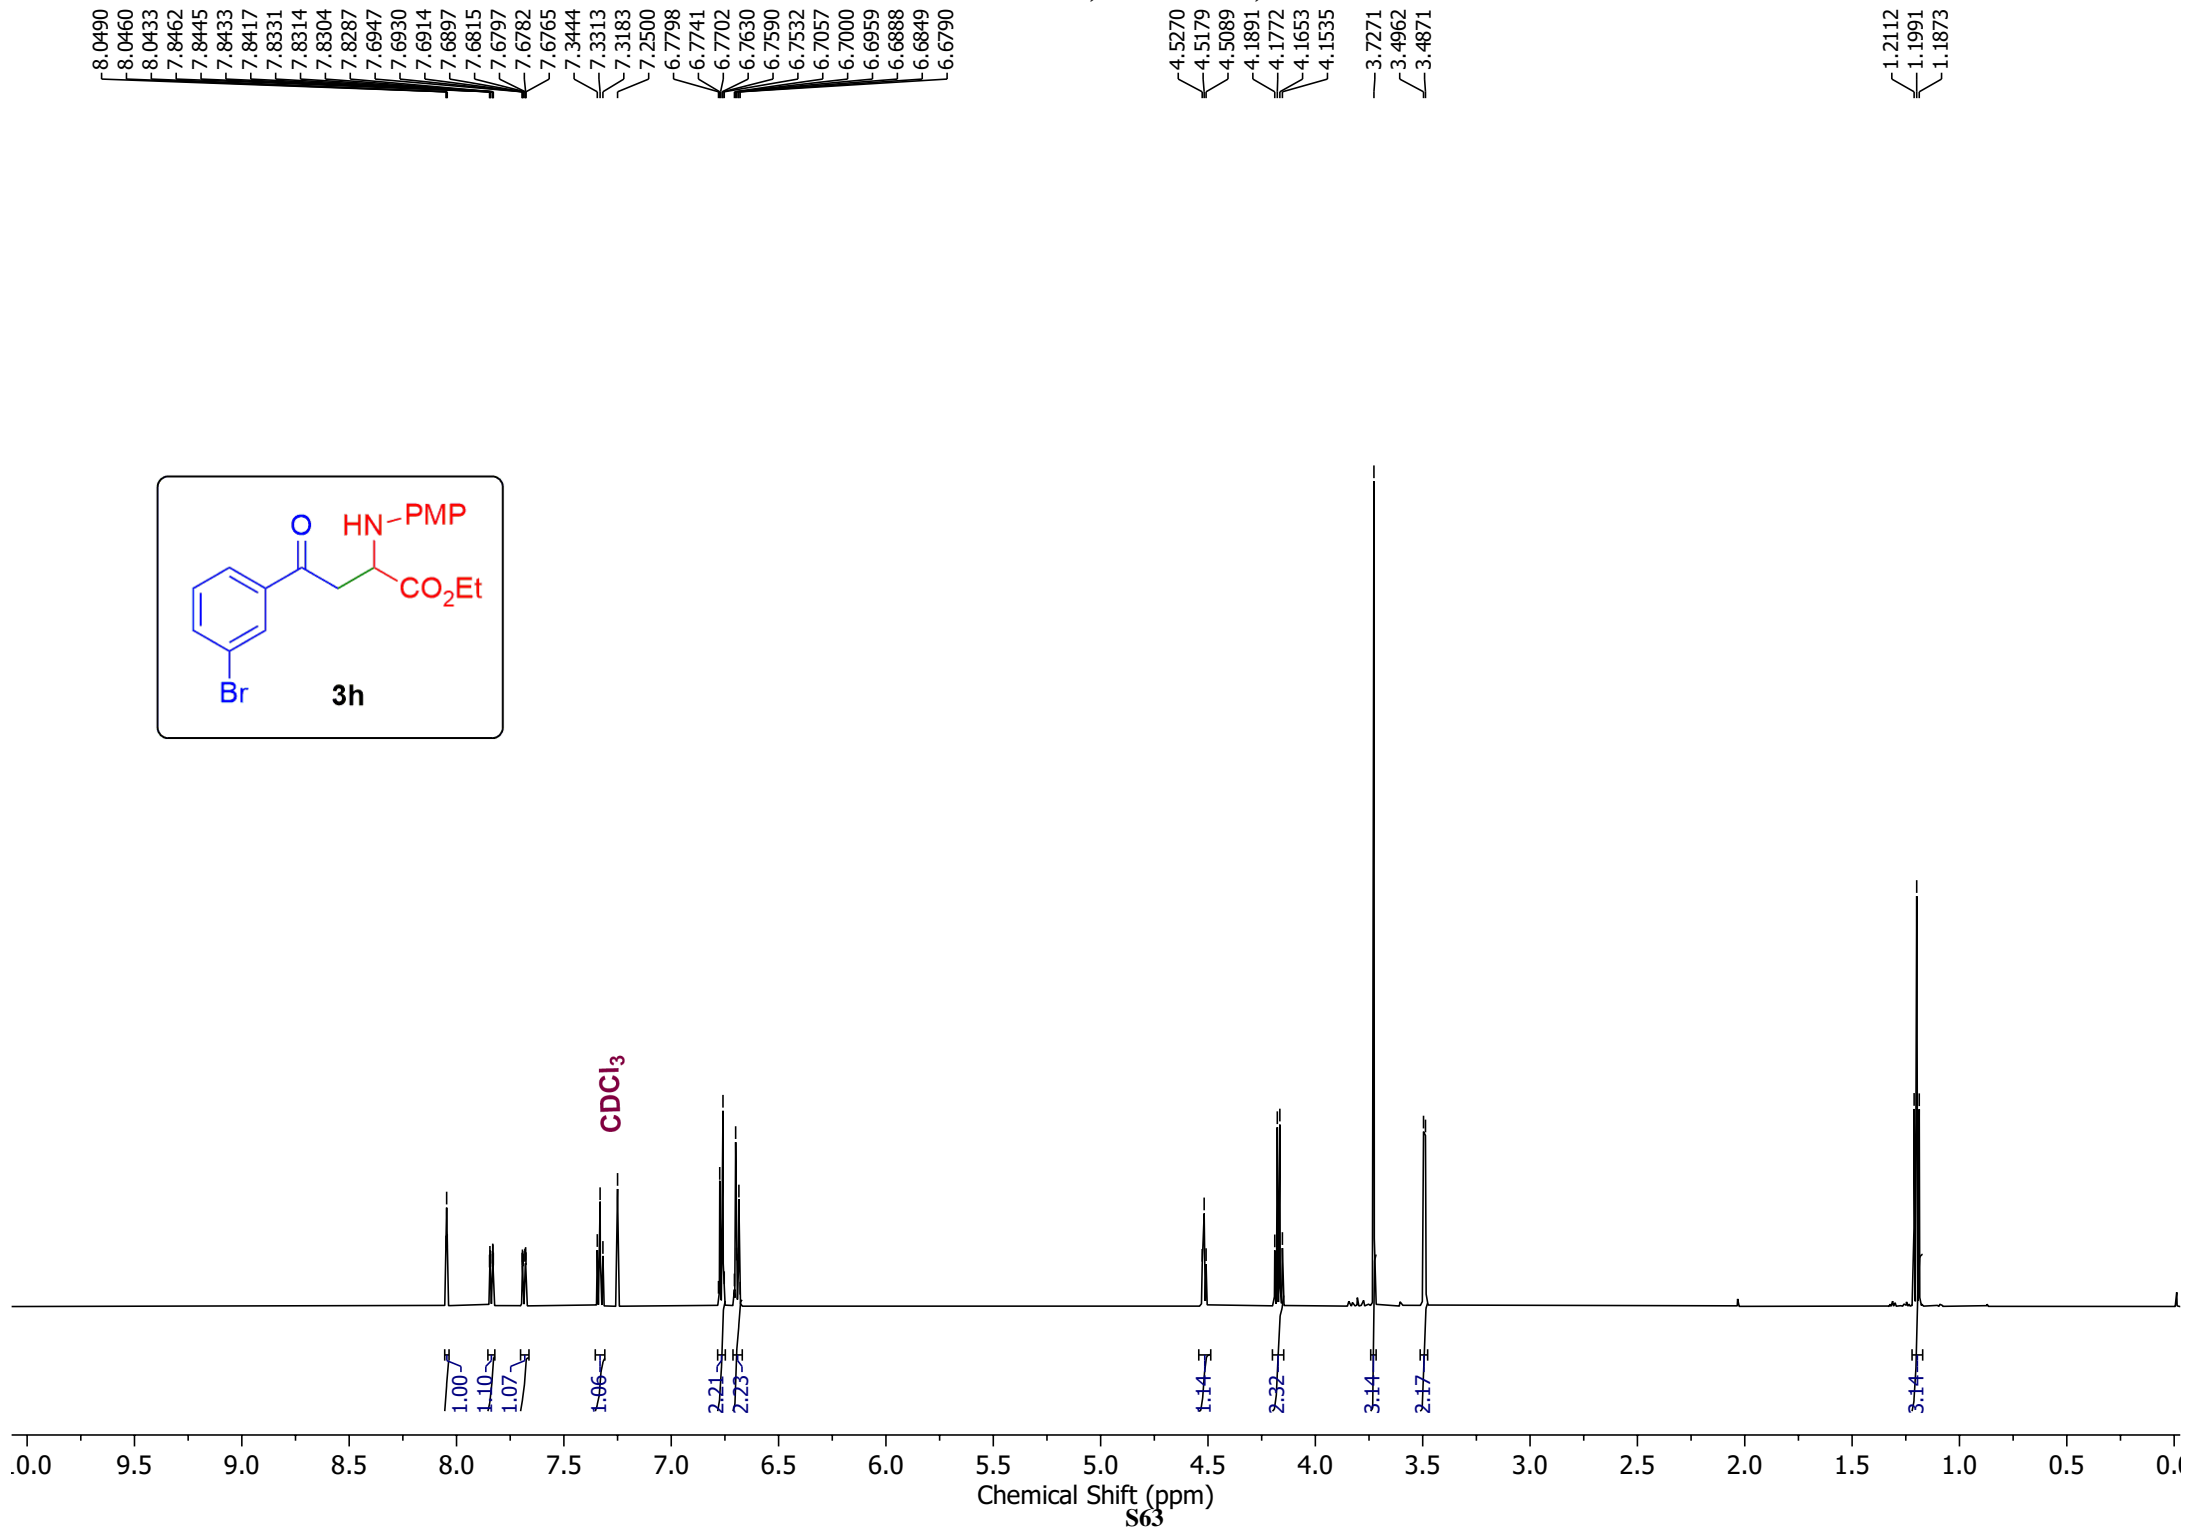

<sup>13</sup>C NMR, 201.2 MHz, CDCl<sub>3</sub>

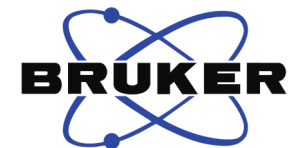

Current Data Parameters  
NAME barc-RC-2059-13C-23Sep21  
EXPNO 1  
PROCNO 1

F2 - Acquisition Parameters

Date\_ 20210923  
Time 12.43 h  
INSTRUM spect  
PROBHD Z555801\_0012 (  
PULPROG zgdc  
TD 16384  
SOLVENT CDCl3  
NS 427  
DS 4  
SWH 48543.688 Hz  
FIDRES 5.925743 Hz  
AQ 0.1687552 sec  
RG 71.8  
DW 10.300 usec  
DE 6.50 usec  
TE 298.0 K  
D1 3.0000000 sec  
D11 0.0300000 sec  
TD0 1  
SFO1 201.1878208 MHz  
NUC1 13C  
P1 8.00 usec  
PLW1 312.79998779 W  
SFO2 800.0332001 MHz  
NUC2 1H  
CPDPRG2 waltz16  
PCPD2 60.00 usec  
PLW2 13.00000000 W  
PLW12 0.29249999 W

F2 - Processing parameters  
SI 16384  
SF 201.1677102 MHz  
WDW EM  
SSB 0  
LB 5.00 Hz  
GB 0  
PC 1.40

— 196.093

— 172.931

153.125  
140.332  
138.192  
136.298  
131.199  
130.256  
126.618  
123.026  
115.826  
114.866

CDCl<sub>3</sub>  
77.151  
76.993  
76.835

61.549  
55.671  
54.472

— 41.108

— 14.075

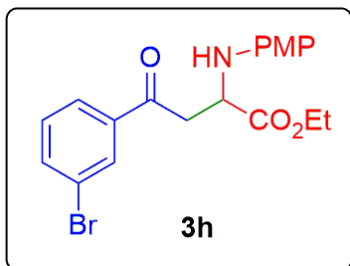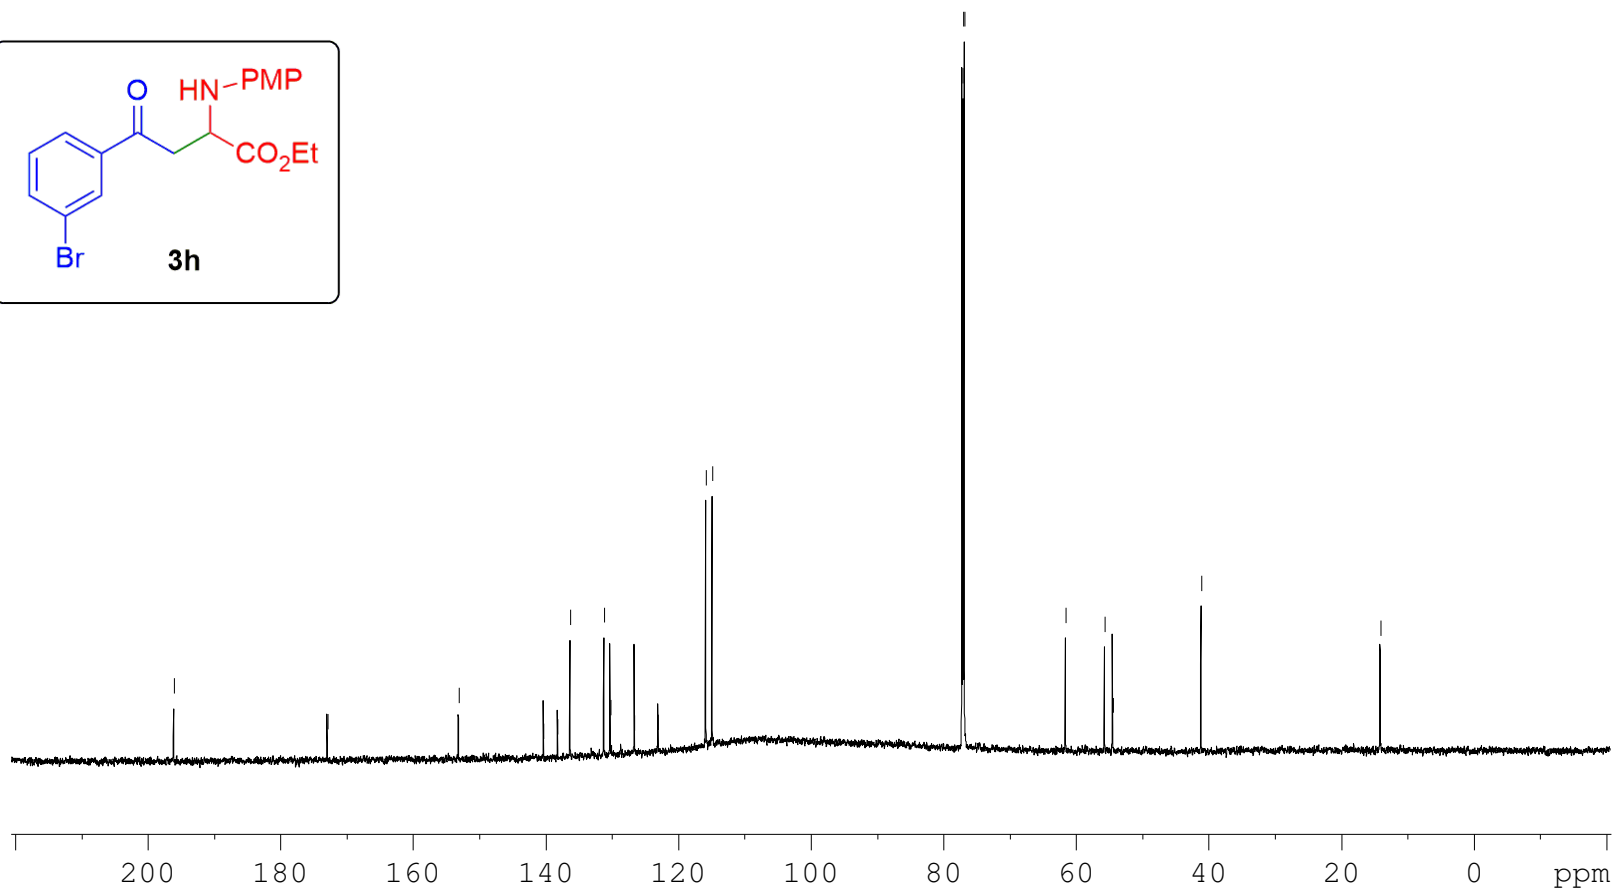



CDCl<sub>3</sub>

<sup>1</sup>H NMR, 600 MHz, CDCl<sub>3</sub>

7.896  
7.803  
7.790  
7.542  
7.529  
7.409  
7.396  
7.383  
7.255  
6.777  
6.763  
6.690  
6.676

4.532  
4.524  
4.515  
4.194  
4.182  
4.171  
4.159  
3.730  
3.494  
3.485

1.215  
1.204  
1.192

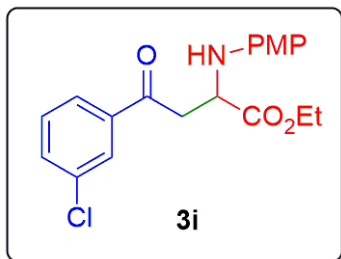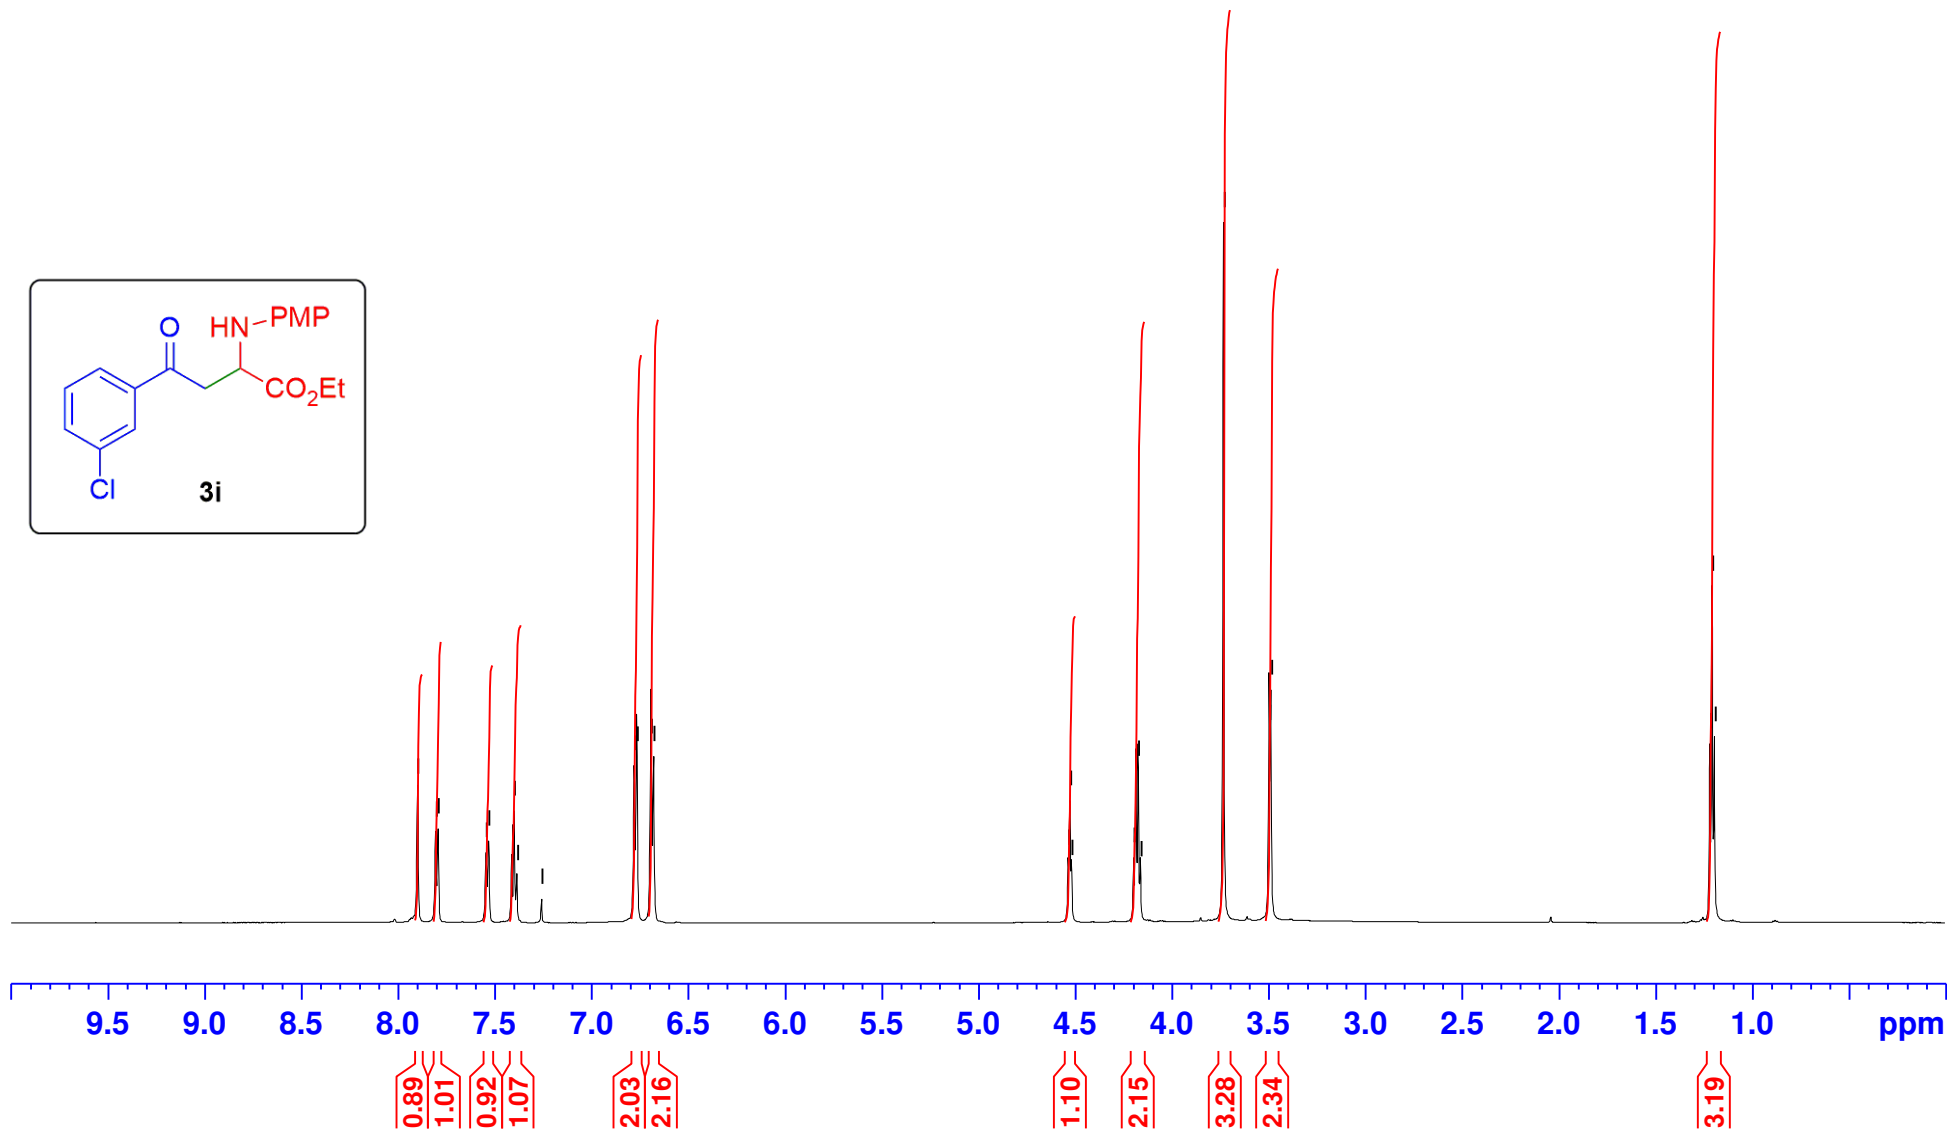

<sup>13</sup>C NMR, 201.2 MHz, CDCl<sub>3</sub>

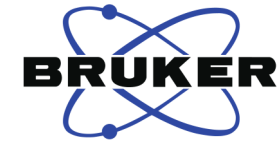

Current Data Parameters  
NAME barc-RC-2026-13C-24Jan21  
EXPNO 1  
PROCNO 1

F2 - Acquisition Parameters  
Date\_ 20210224  
Time 12.18 h  
INSTRUM spect  
PROBHD Z44909\_0011 (C)  
PULPROG zgdc  
TD 16384  
SOLVENT CDCl3  
NS 108  
DS 4  
SWH 48543.688 Hz  
FIDRES 5.925743 Hz  
AQ 0.1687552 sec  
RG 71.8  
DW 10.300 usec  
DE 18.00 usec  
TE 298.0 K  
D1 3.00000000 sec  
D11 0.03000000 sec  
TDO 1  
SFO1 201.1878208 MHz  
NUC1 13C  
P1 15.00 usec  
PLW1 141.03999329 W  
SFO2 800.0332001 MHz  
NUC2 1H  
CPDPRG[2] waltz16  
PCPD2 60.00 usec  
PLW2 10.18999958 W  
PLW12 0.16679481 W

F2 - Processing parameters  
SI 16384  
SF 201.1677040 MHz  
WDW EM  
SSB 0  
LB 5.00 Hz  
GB 0  
PC 1.40

— 196.225

— 173.011

153.170  
140.365  
138.016  
135.051  
133.410  
130.042  
128.263  
126.224  
115.915  
114.894

CDCl<sub>3</sub>  
77.224  
77.065  
76.907

61.582  
55.690  
54.528

— 41.153

— 14.107

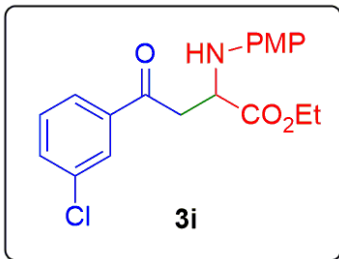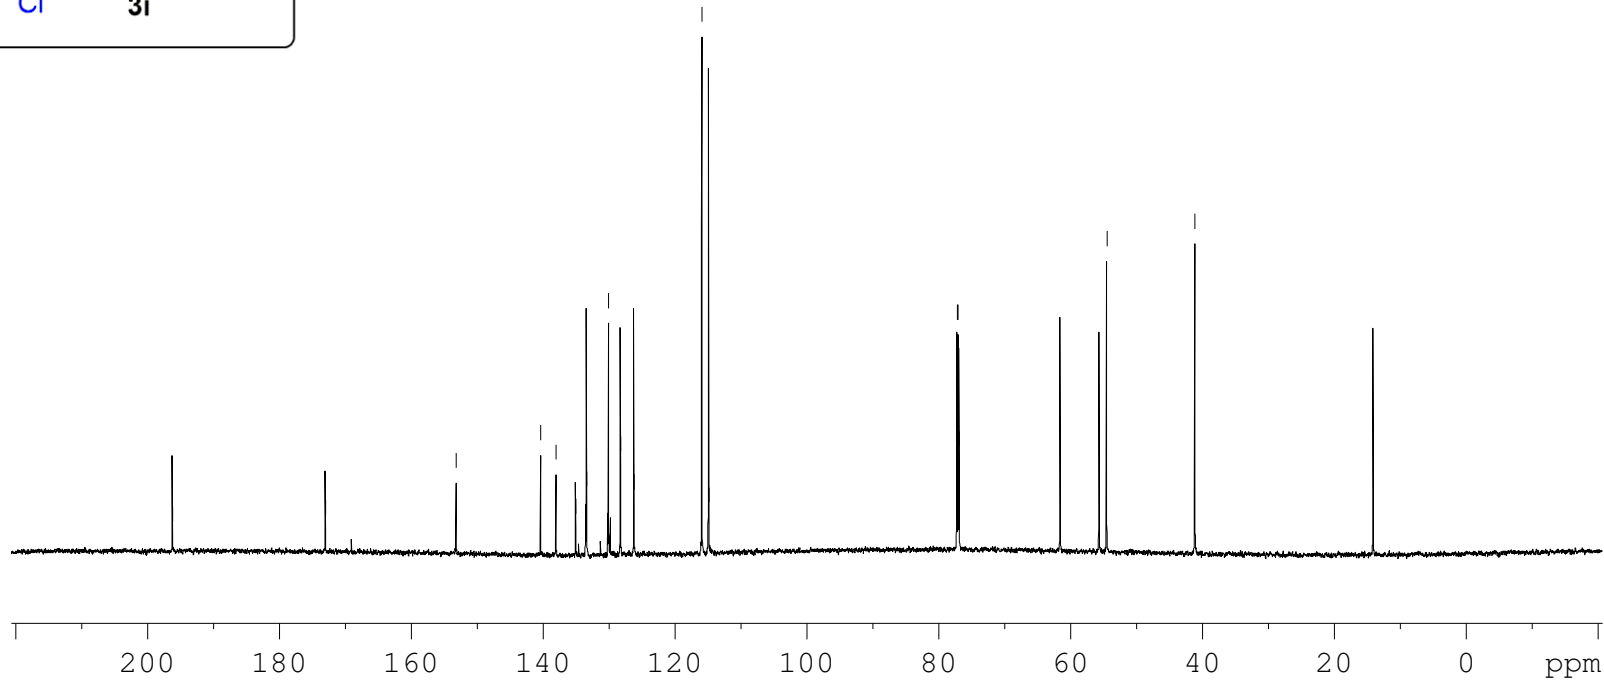

<sup>1</sup>H NMR, 600 MHz, CDCl<sub>3</sub>

CDCl<sub>3</sub>

7.740  
7.727  
7.480  
7.467  
7.455  
7.256  
7.003  
6.991  
6.978  
6.961  
6.948  
6.762  
6.747  
6.655  
6.641

4.481  
4.472  
4.462  
4.182  
4.170  
4.159  
4.147  
3.890  
3.725  
3.561  
3.552  
3.532  
3.523  
3.514  
3.495  
3.485

1.215  
1.203  
1.191

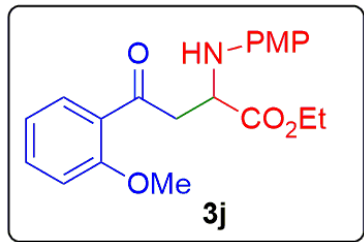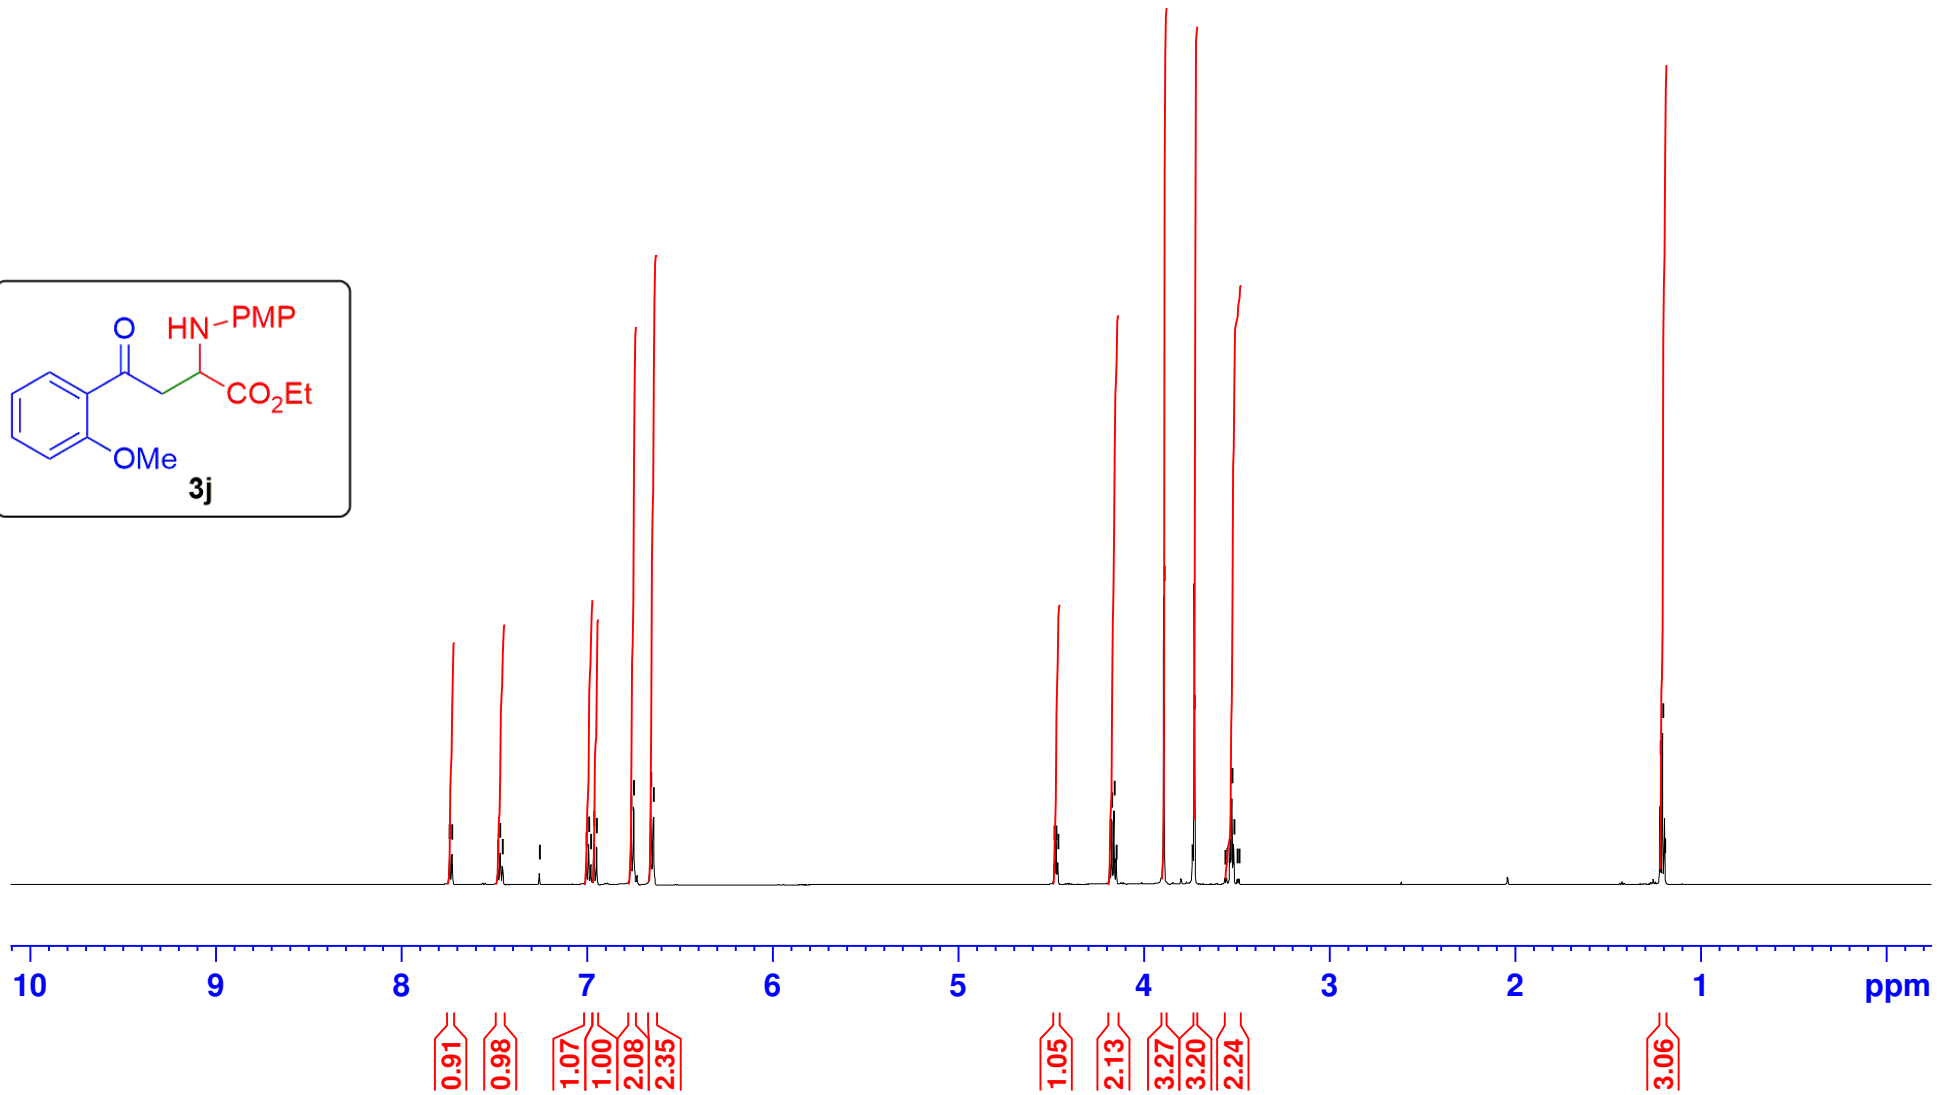

<sup>13</sup>C NMR, 201.2 MHz, CDCl<sub>3</sub>

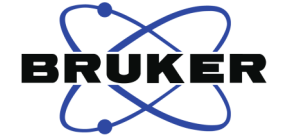

Current Data Parameters  
NAME barc-RC-2119-13C-2July21  
EXPNO 1  
PROCNO 1

F2 - Acquisition Parameters  
Date\_ 20210702  
Time 15.32 h  
INSTRUM spect  
PROBHD z555801\_0012 (z)  
PULPROG zgdc  
TD 16384  
SOLVENT CDCl3  
NS 58  
DS 4  
SWH 48543.688 Hz  
FIDRES 5.925743 Hz  
AQ 0.1687552 sec  
RG 71.8  
DW 10.300 usec  
DE 6.50 usec  
TE 298.0 K  
D1 3.00000000 sec  
D11 0.03000000 sec  
TDD 1  
SF01 201.1878208 MHz  
NUC1 13C  
P1 8.00 usec  
PLW1 312.79998779 W  
SF02 800.0332001 MHz  
NUC2 1H  
CPDPRG2 waltz16  
PCPD2 60.00 usec  
PLW2 13.00000000 W  
PLW12 0.29249999 W

F2 - Processing parameters  
SI 16384  
SF 201.1677188 MHz  
WDW EM  
SSB 0  
LB 5.00 Hz  
GB 0  
PC 1.40

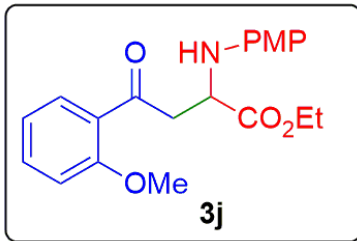

—198.876  
—173.493  
—158.792  
—152.775  
—140.835  
—134.045  
—130.600  
—127.279  
—120.700  
—115.557  
—114.729  
—111.481  
—77.151  
—76.993  
—76.835  
—61.158  
—55.632  
—55.428  
—54.693  
—46.409  
—14.057

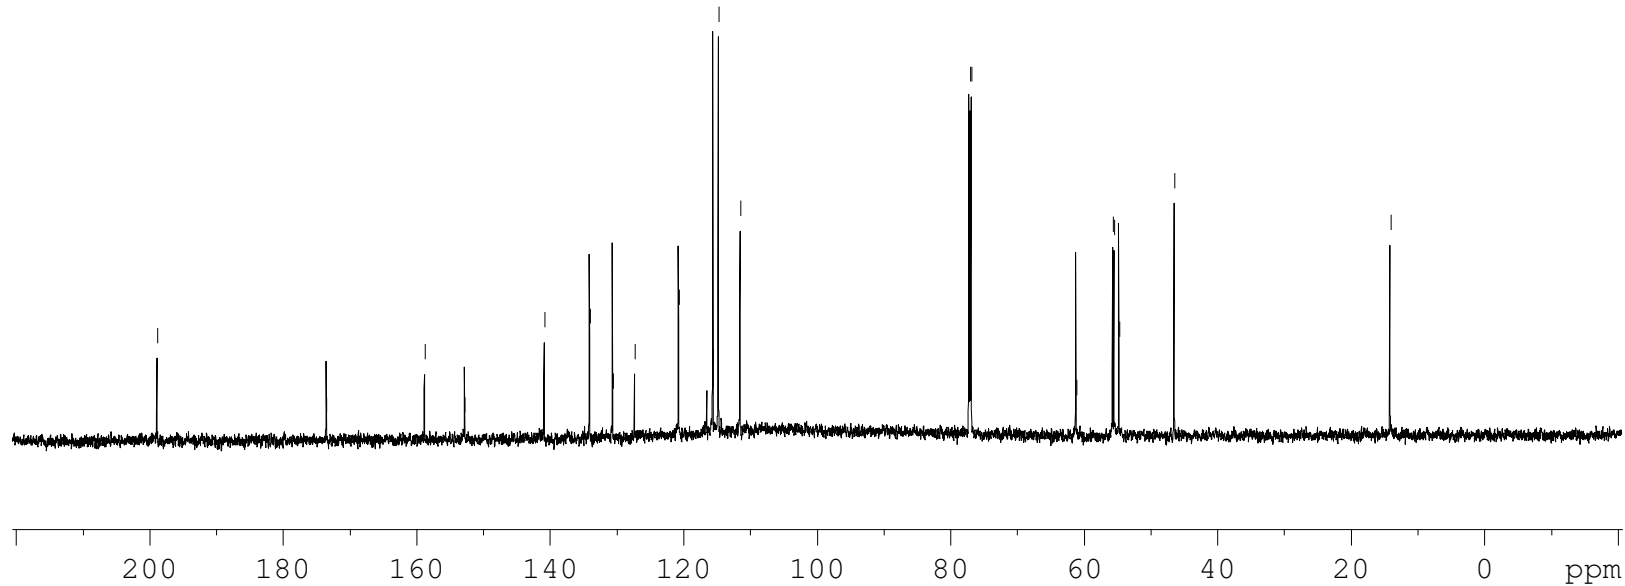

<sup>1</sup>H NMR, 600 MHz, CDCl<sub>3</sub>

8.0380  
8.0357  
8.0331  
8.0309  
7.5279  
7.5258  
7.5195  
7.5172  
7.3124  
7.3076  
7.3040  
7.2992  
7.2500  
6.7671  
6.7631  
6.7559  
6.7520  
6.7461  
6.6820  
6.6761  
6.6722  
6.6649  
6.6610

4.5046  
4.4955  
4.4862  
4.1772  
4.1653  
4.1535  
4.1416  
— 3.7227  
3.4183  
3.4088

1.1990  
1.1871  
1.1752

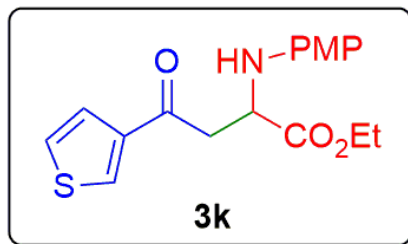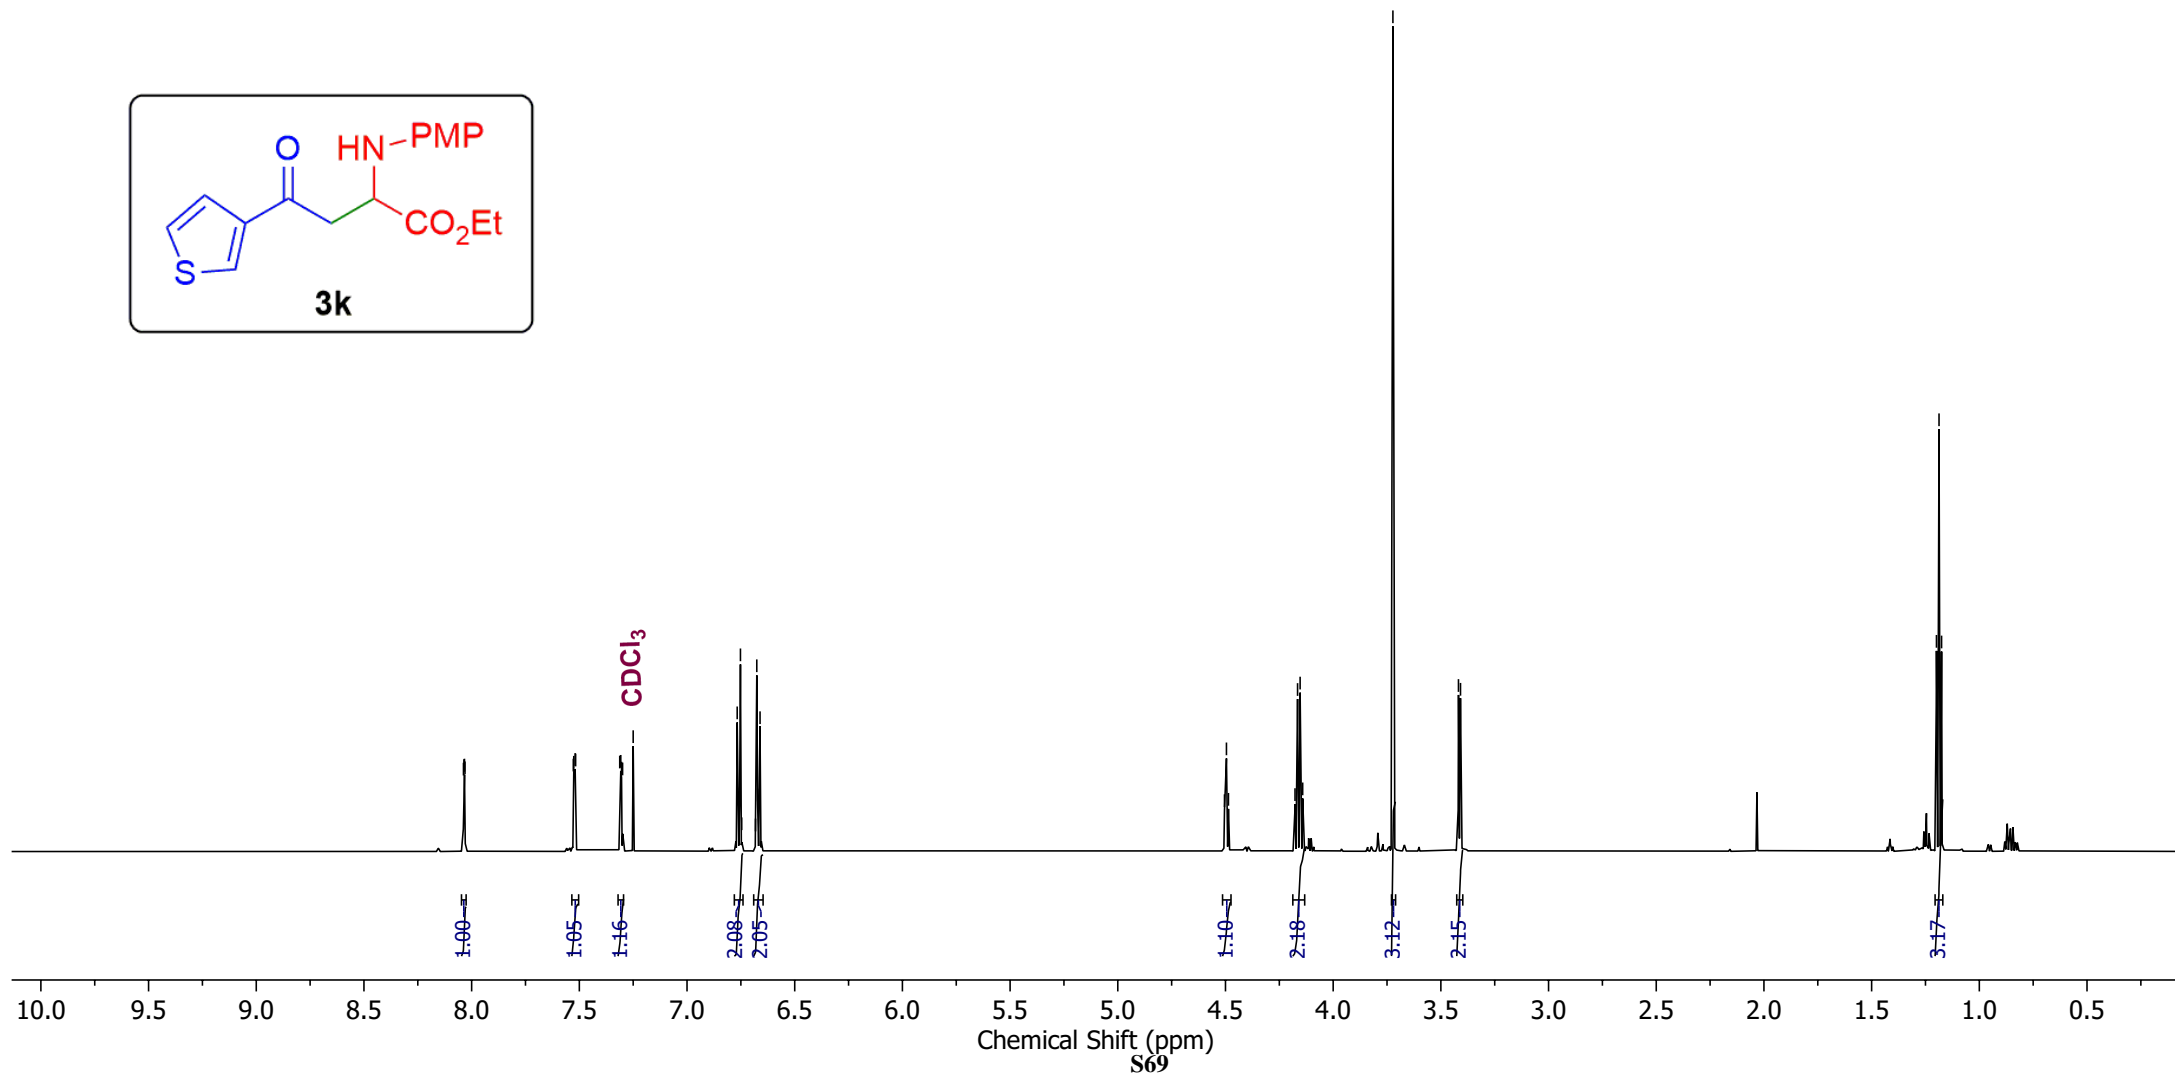

**<sup>13</sup>C NMR, 201.2 MHz, CDCl<sub>3</sub>**

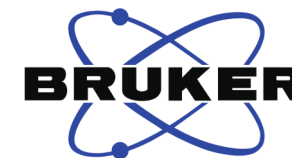

```
Current Data Parameters
NAME      bare-NC-2103-13C-2July21
EXPNO    1
PROCNO   1

F2 - Acquisition Parameters
Date_    20210702
Time     13.37 h
INSTRUM  spect
PROBHD   z515801_001z (
PULPROG  zgpg
TD        65536
SOLVENT  CDCl3
NS        50
DS        4
SWH       48841.488 Hz
FIDRES    0.3225743 Hz
AQ        0.1487552 sec
RG         71.8
DW        10.300 usec
DE         6.00 usec
TE        298.0 K
D1        3.0000000 sec
D11       0.0300000 sec
TD0       1
SFO1     201.1878208 MHz
NUC1      13C
P1        8.00 usec
PL1      312.79998779 W
SFO2     800.0330001 MHz
NUC2      1H
CPDPRG2  waltz16
PCPD2    60.00 usec
PLM2     13.0000000 W
PLM12    0.29249999 W

F2 - Processing parameters
SI        16384
SF        201.1677040 MHz
WDW       EM
SSB       0
LB        5.00 Hz
GB        0
PC        1.40
```

— 191.530

— 173.147

— 153.025

< 141.888

< 140.551

— 132.580

< 126.825

< 126.635

< 115.734

< 114.871

CDCl<sub>3</sub>  
< 77.238  
< 77.079  
< 76.921

— 61.469

< 55.691

< 54.513

— 42.218

— 14.088

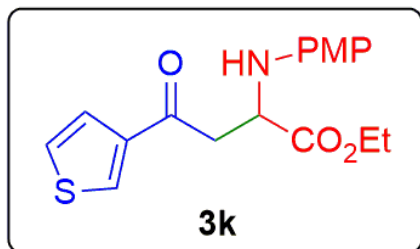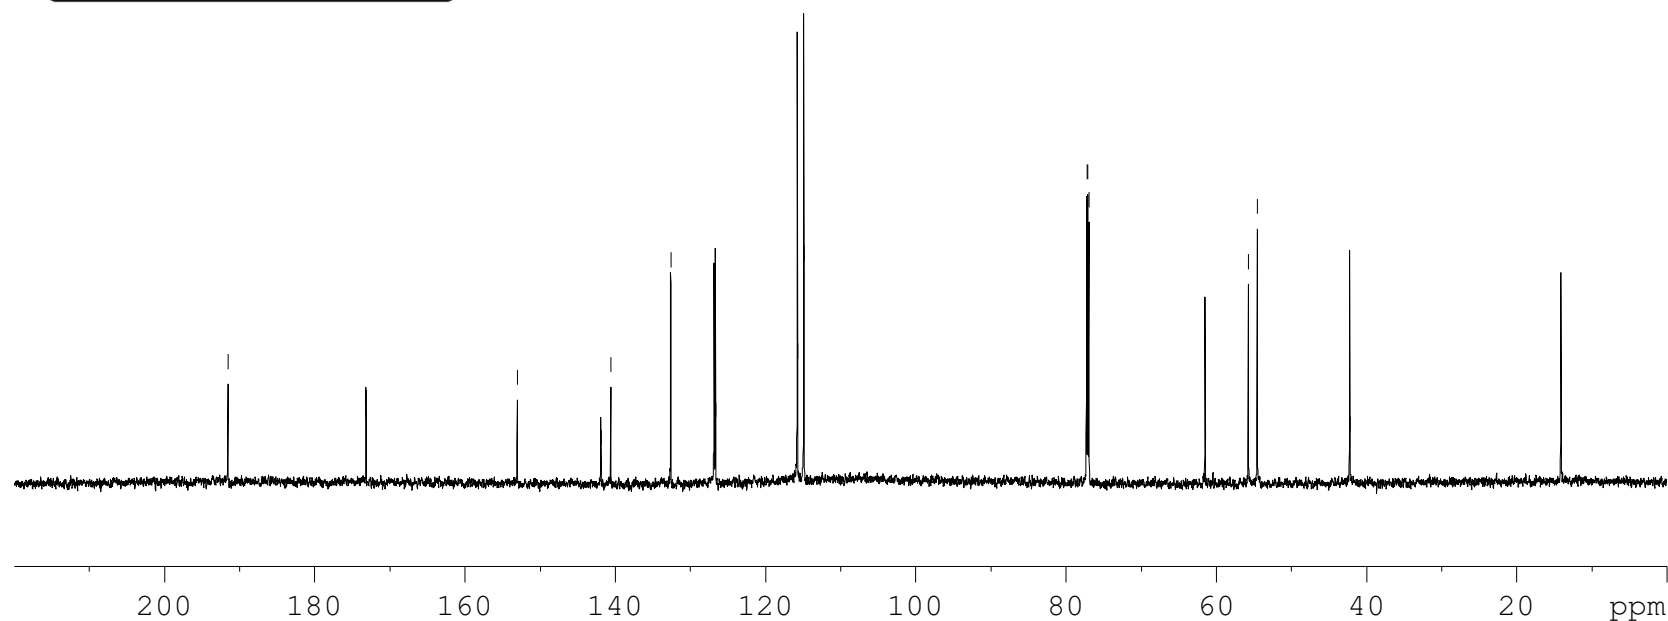

<sup>1</sup>H NMR, 600 MHz, CDCl<sub>3</sub>

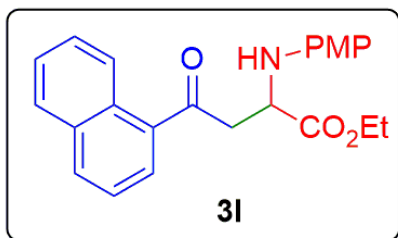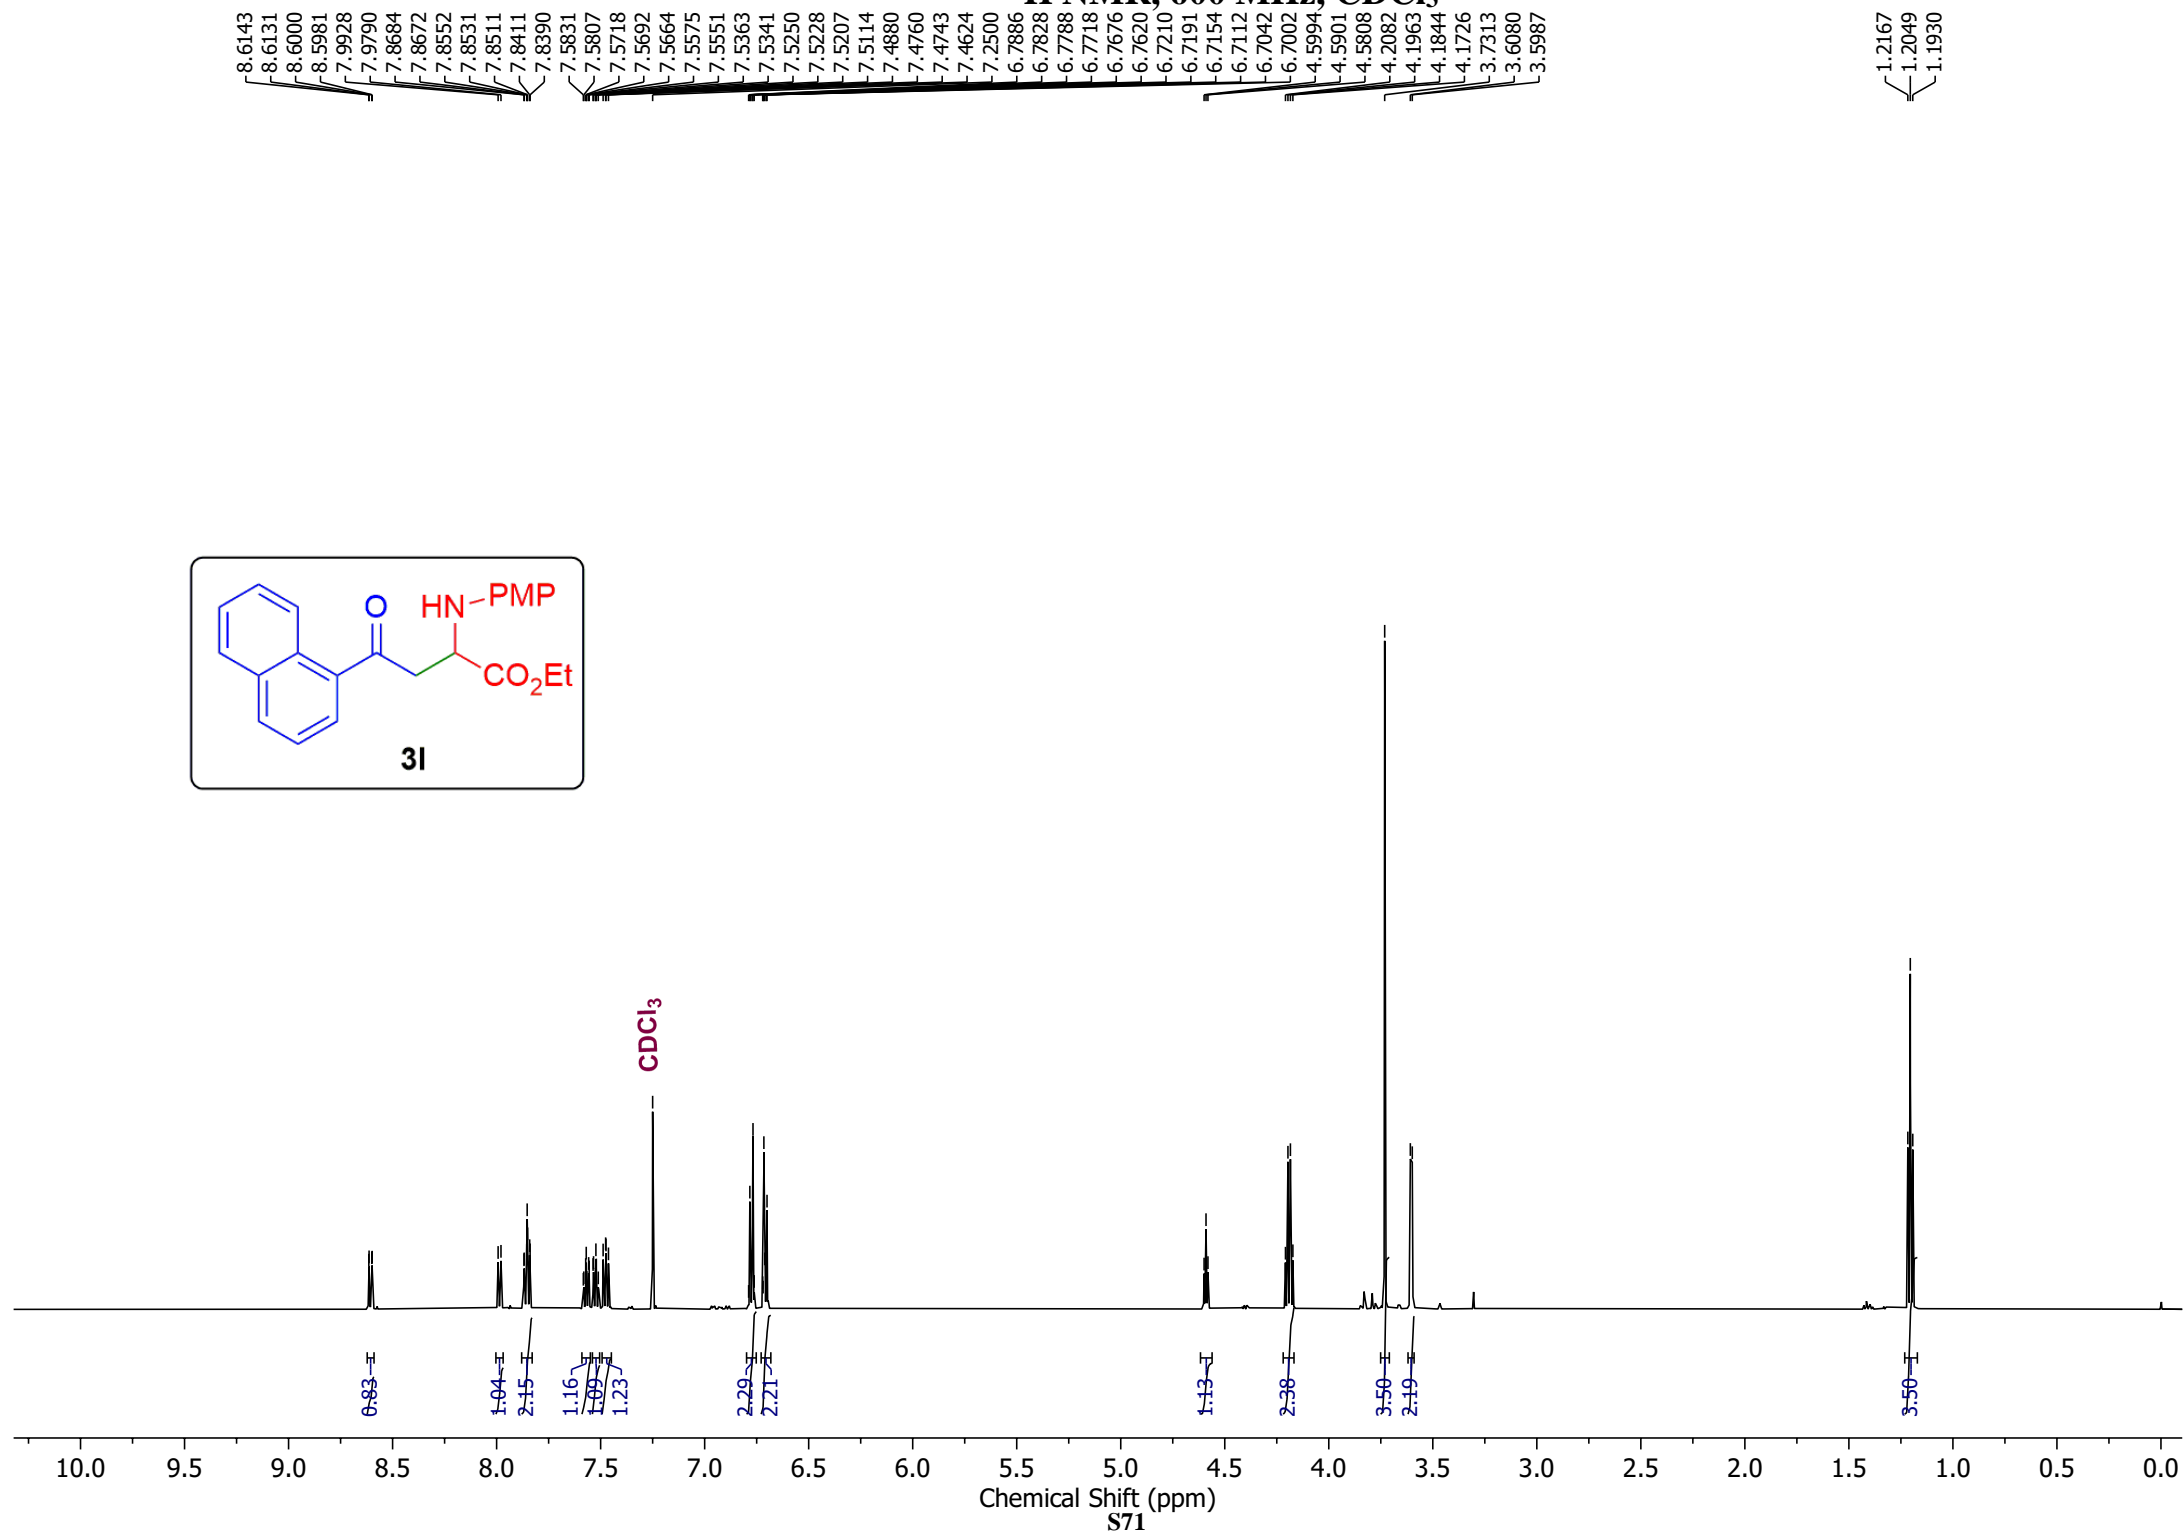

**<sup>13</sup>C NMR, 201.2 MHz, CDCl<sub>3</sub>**

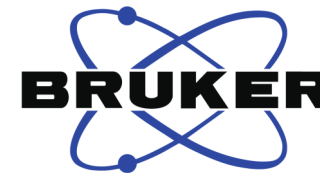

Current Data Parameters  
NAME barc-RC-2120-13C-2July21  
EXPNO 1  
PROCNO 1

F2 - Acquisition Parameters  
Date\_ 20210702  
Time 16.06 h  
INSTRUM spect  
PROBHD Z555801\_0012 ( )  
PULPROG zgpg  
TD 16384  
SOLVENT CDCl3  
NS 97  
DS 4  
SWH 48543.698 Hz  
FIDRES 5.925743 Hz  
AQ 0.1687552 sec  
RG 71.8  
DW 10.300 usec  
DE 6.50 usec  
TE 298.0 K  
D1 3.0000000 sec  
D11 0.03000000 sec  
TD0 1  
SFO1 201.1878208 MHz  
NUC1 13C  
F1 8.00 usec  
PLW1 312.79998779 W  
SFO2 800.0332001 MHz  
NUC2 1H  
CPDPRG2 waltz16  
PCPD2 60.00 usec  
PLW2 13.00000000 W  
PLW12 0.29249999 W

F2 - Processing parameters  
SI 16384  
SF 201.1677171 MHz  
WDW EM  
SSB 0  
LB 5.00 Hz  
GB 0  
PC 1.40

— 201.274

— 173.159

153.024

140.558

135.219

133.878

133.062

130.029

128.366

128.038

127.895

126.528

125.718

124.257

115.820

114.829

CDCl<sub>3</sub>

77.152

76.994

76.834

61.470

55.641

54.977

44.362

— 14.080

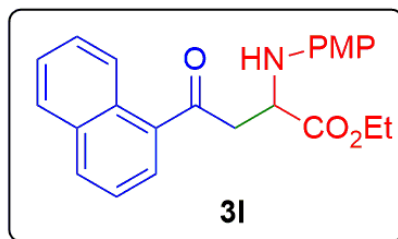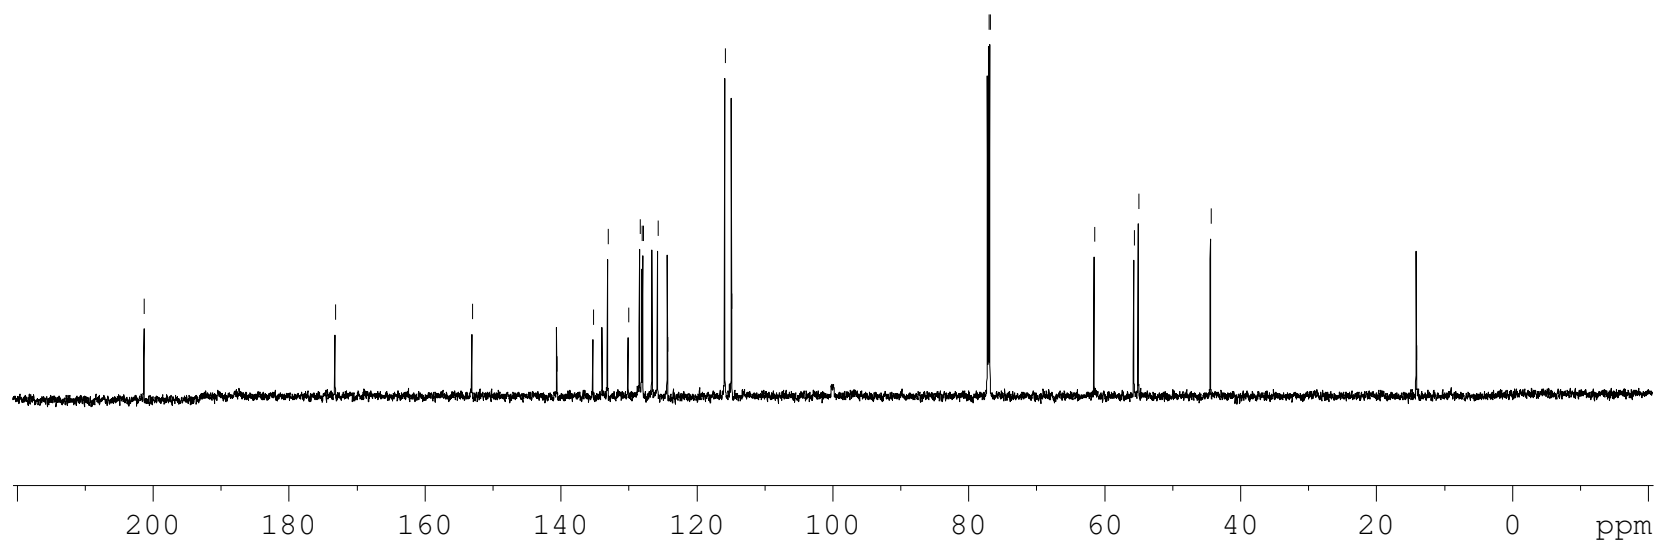



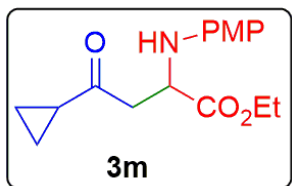

**CDCl<sub>3</sub>**

**<sup>1</sup>H NMR, 600 MHz, CDCl<sub>3</sub>**

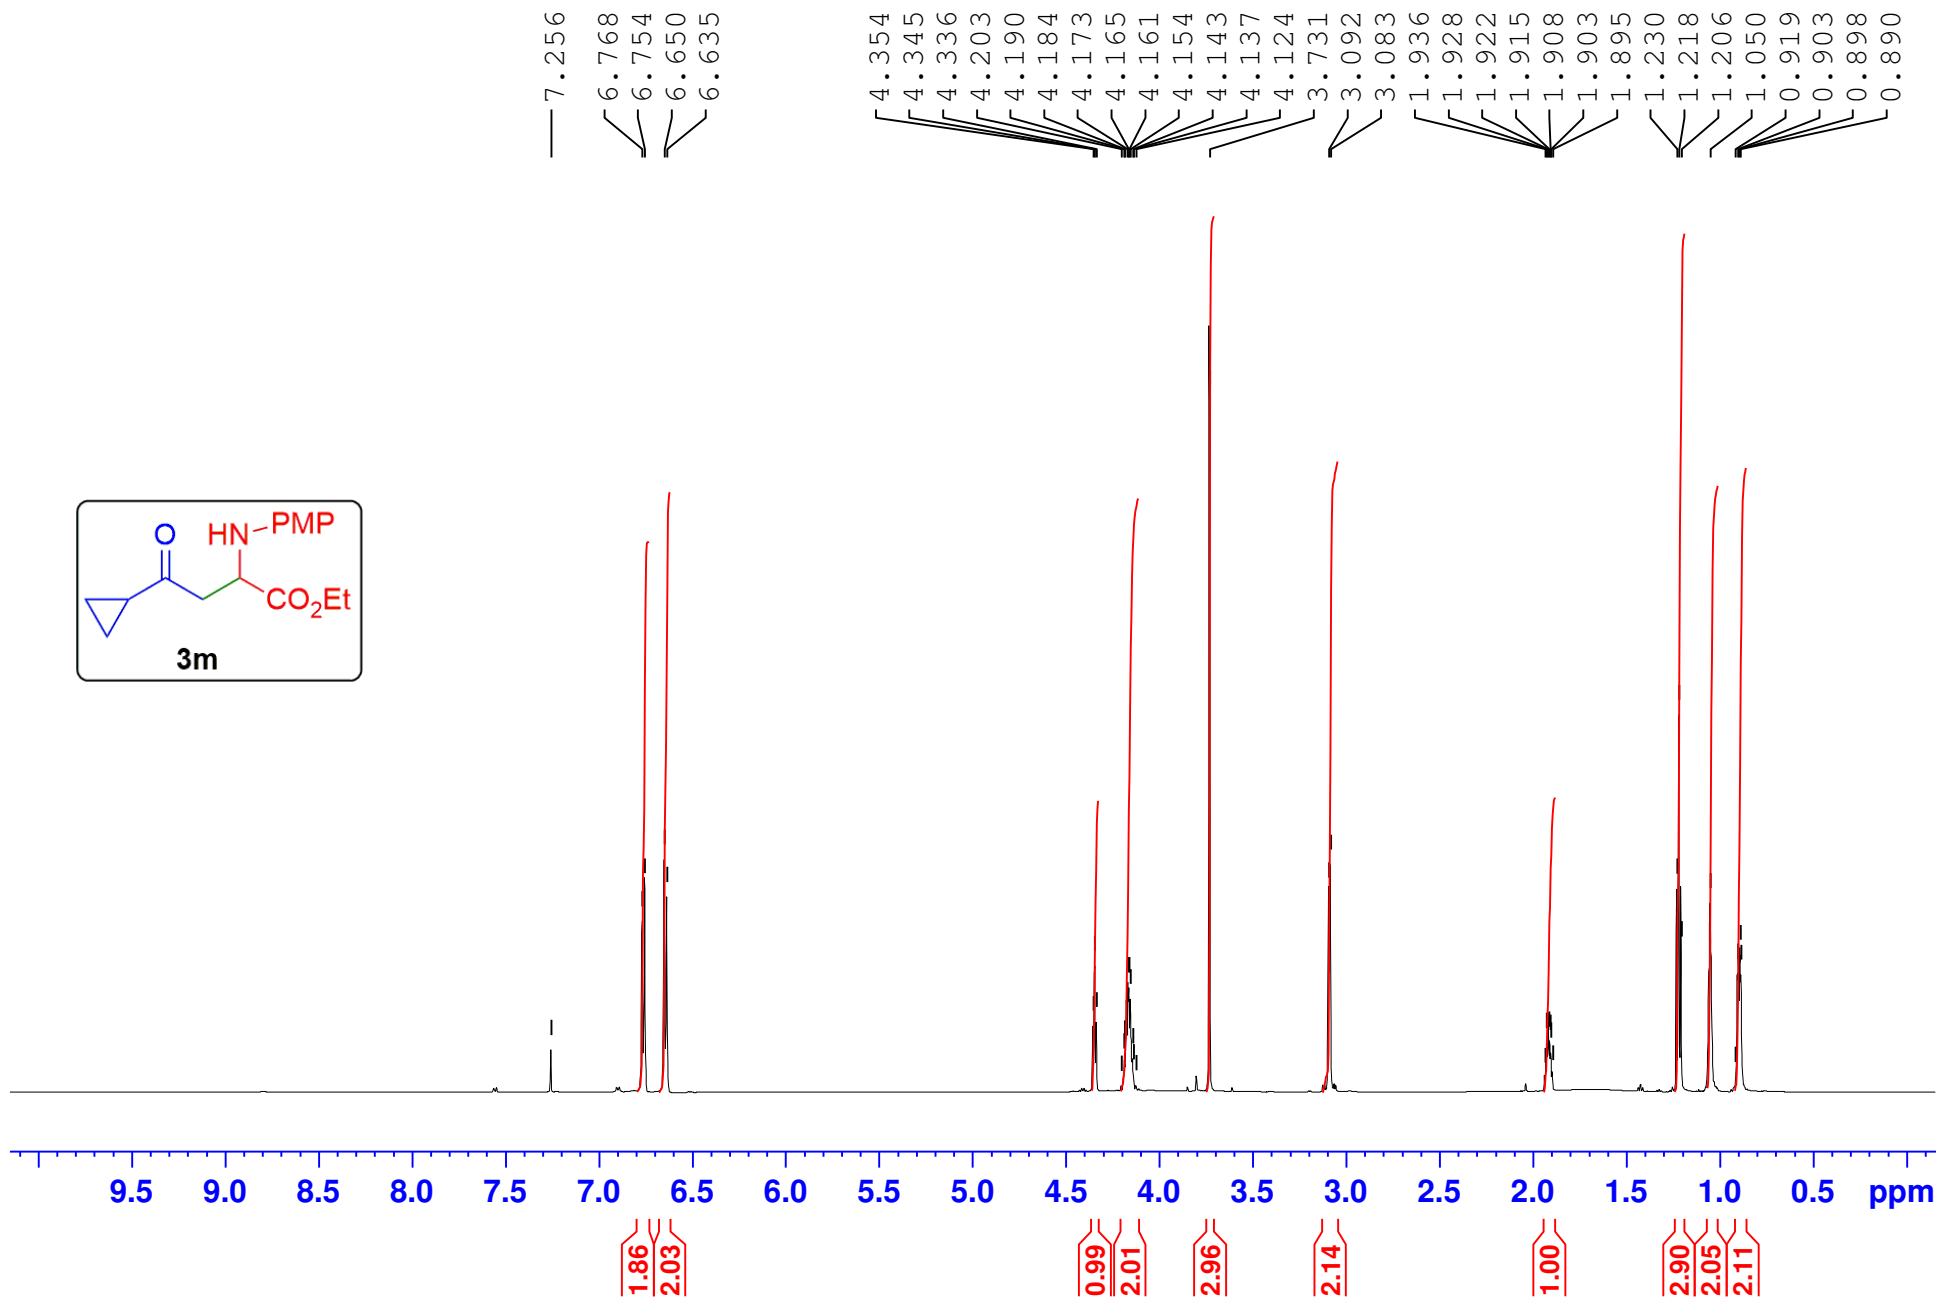

<sup>13</sup>C NMR, 201.2 MHz, CDCl<sub>3</sub>

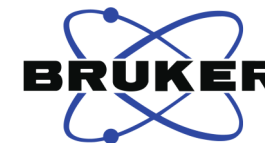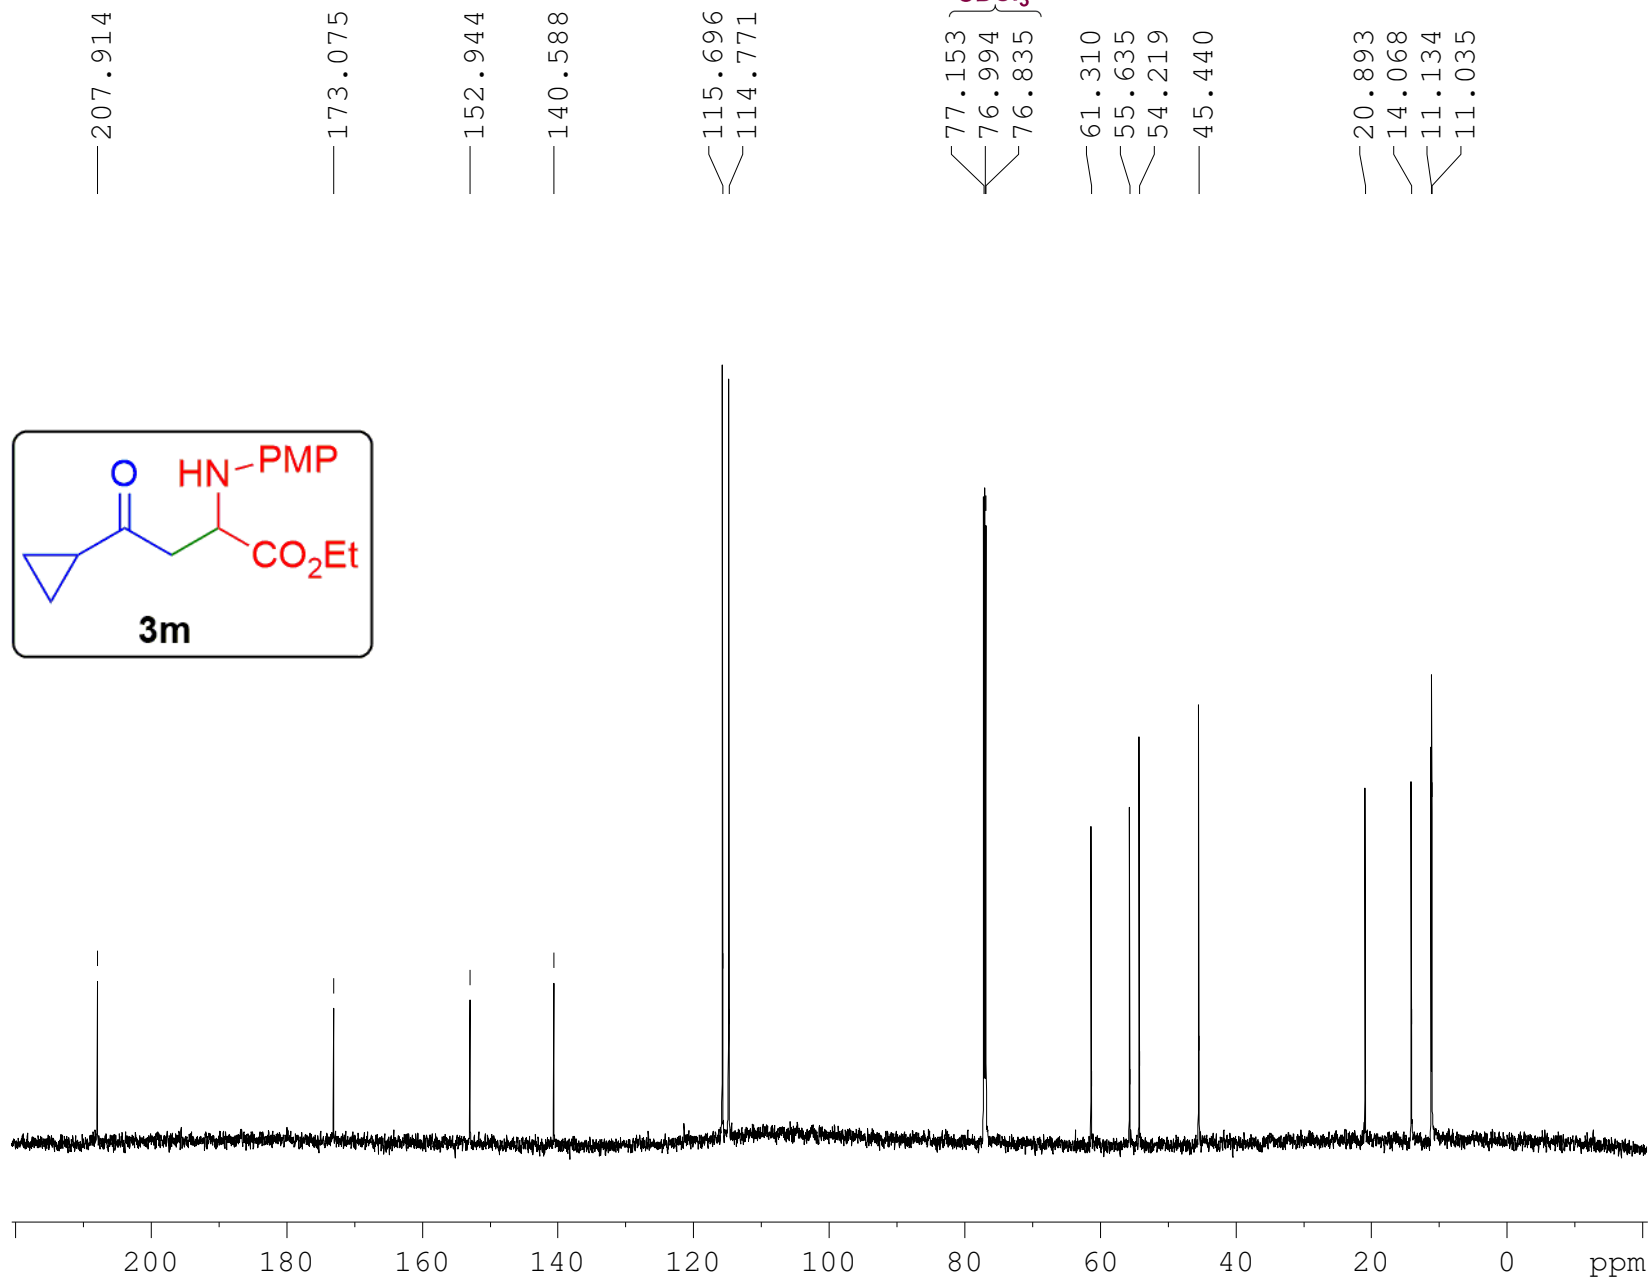

Current Data Parameters  
NAME barc-RC-2121-13C-2July21  
EXPNO 1  
PROCNO 1

F2 - Acquisition Parameters  
Date\_ 20210702  
Time 16.14 h  
INSTRUM spect  
PROBHD Z555801\_0012 (4  
PULPROG zgdc  
TD 16384  
SOLVENT CDCl3  
NS 112  
DS 4  
SWH 48543.688 Hz  
FIDRES 5.925743 Hz  
AQ 0.1687552 sec  
RG 71.8  
DW 10.300 usec  
DE 6.50 usec  
TE 298.0 K  
D1 3.0000000 sec  
D11 0.0300000 sec  
TD0 1  
SFO1 201.1878208 MHz  
NUC1 13C  
P1 8.00 usec  
PLW1 312.79998779 W  
SFO2 800.032001 MHz  
NUC2 1H  
CPDPRG2 waltz16  
PCPD2 60.00 usec  
PLW2 13.0000000 W  
PLW12 0.29249999 W

F2 - Processing parameters  
SI 16384  
SF 201.1677150 MHz  
WDW EM  
SSB 0  
LB 5.00 Hz  
GB 0  
PC 1.40

<sup>1</sup>H NMR, 600 MHz, CDCl<sub>3</sub>

CDCl<sub>3</sub>

7.403  
7.395  
7.256  
6.780  
6.765  
6.662  
6.648

4.432  
4.422  
4.412  
4.244  
4.232  
4.226  
4.215  
4.204  
4.193  
4.182  
4.176  
4.163  
3.738  
3.155  
3.145

1.267  
1.255  
1.244

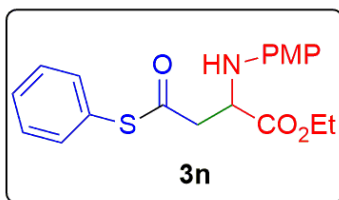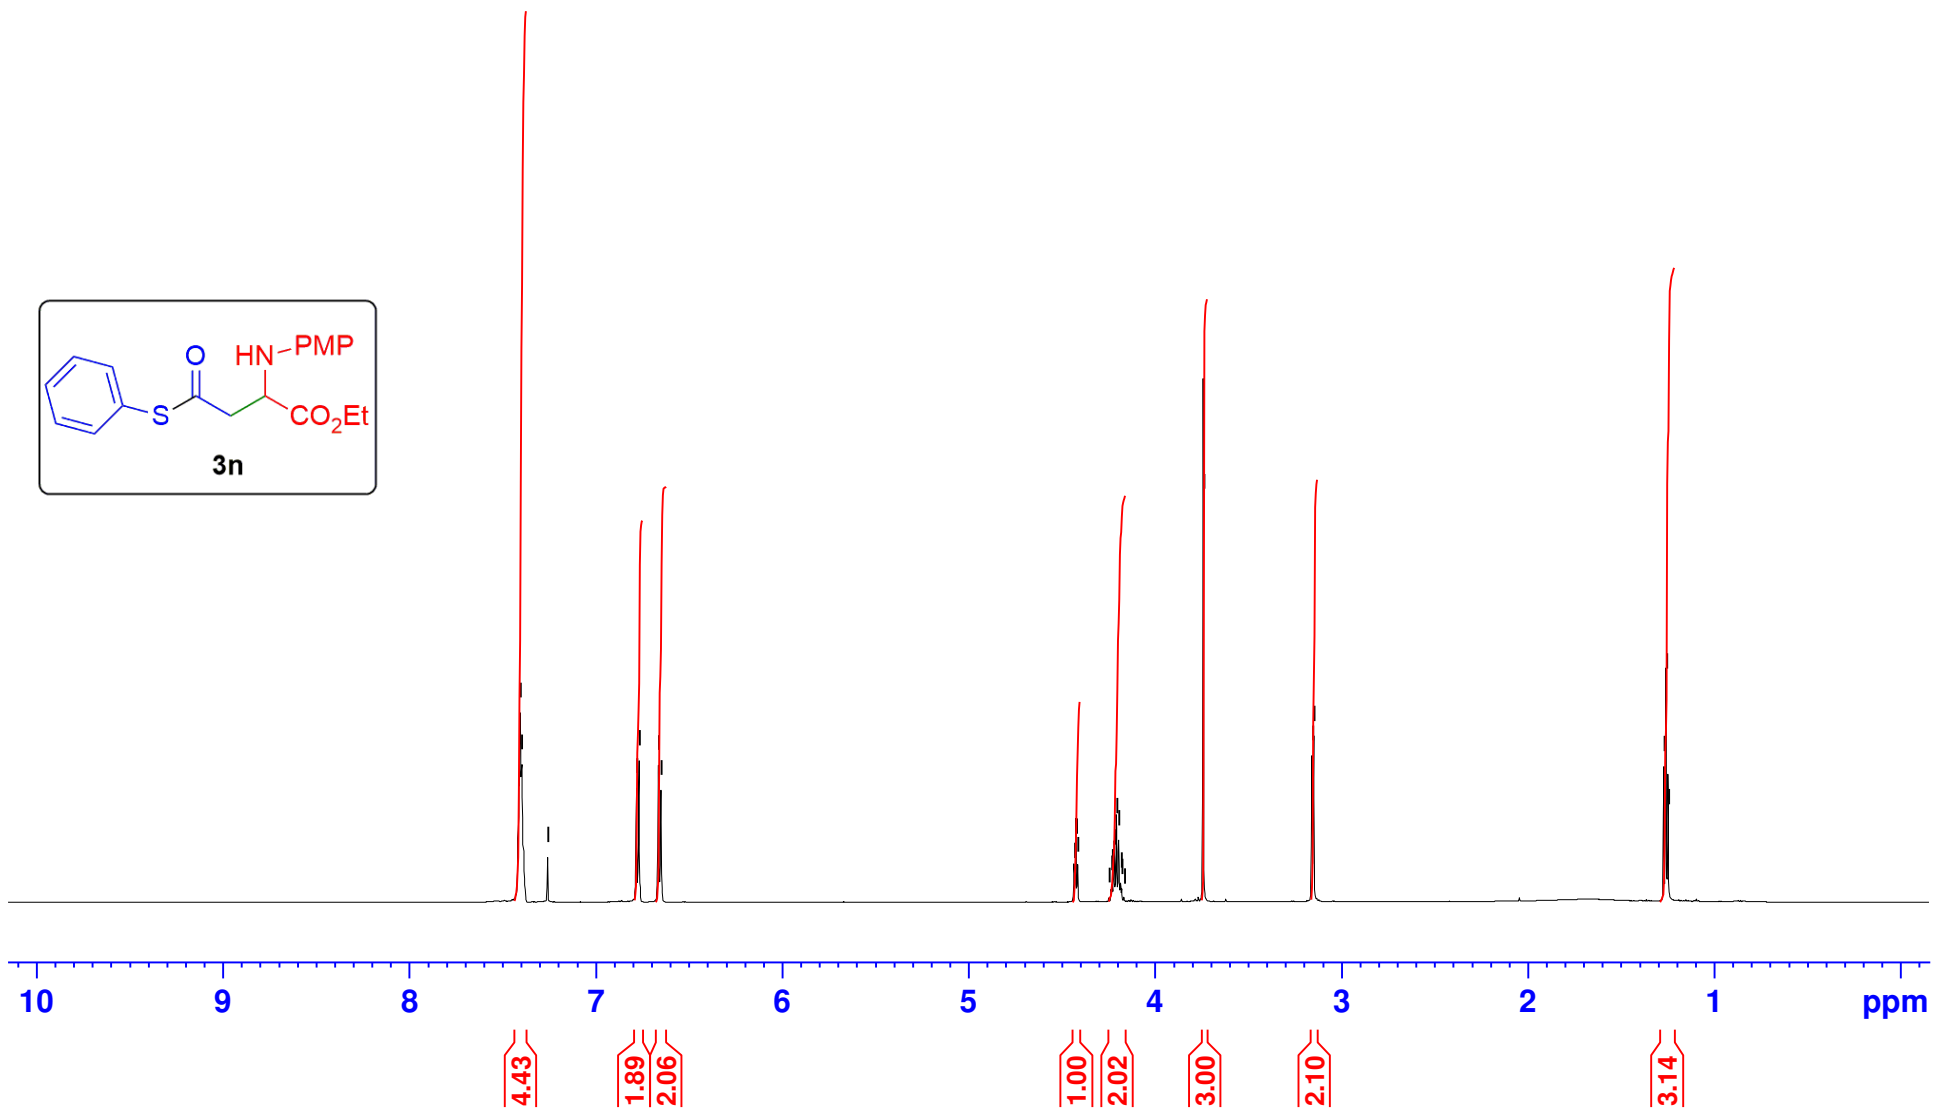

<sup>13</sup>C NMR, 201.2 MHz, CDCl<sub>3</sub>

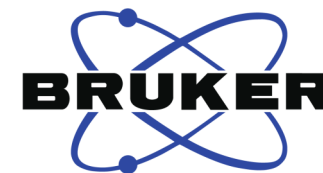

Current Data Parameters  
NAME barc-RC-2107-13C-2July21  
EXPRO 1  
PROCNO 1

F2 - Acquisition Parameters  
Date\_ 20210702  
Time 15.05 h  
INSTRUM spect  
PROBHD z55801\_0012 ( zgc  
PULPROG zgdc  
TD 16384  
SOLVENT cdcl3  
NS 524  
DS 4  
SWH 48543.688 Hz  
FIDRES 5.925743 Hz  
AQ 0.1687552 sec  
RG 71.8  
EW 10.300 usec  
DE 6.50 usec  
TE 298.0 K  
D1 3.0000000 sec  
D11 0.0300000 sec  
TD0 1  
SFO1 201.1878208 MHz  
NUC1 13C  
P1 8.00 usec  
PLW1 312.79998779 W  
SFO2 800.9332001 MHz  
NUC2 1H  
CPDPRG2 waltz16  
PCPD2 60.00 usec  
PLW2 13.00000000 W  
PLW12 0.29249999 W

F2 - Processing parameters  
SI 16384  
SF 201.1677109 MHz  
WDW EM  
SSB 0  
LB 5.00 Hz  
GB 0  
PC 1.40

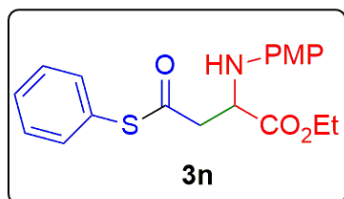

— 194.740

— 172.215

— 153.163

— 140.121

— 134.421

— 129.625

— 129.257

— 127.106

— 115.820

— 114.856

CDCl<sub>3</sub>

77.160

77.001

76.843

61.680

55.662

55.249

45.684

— 14.133

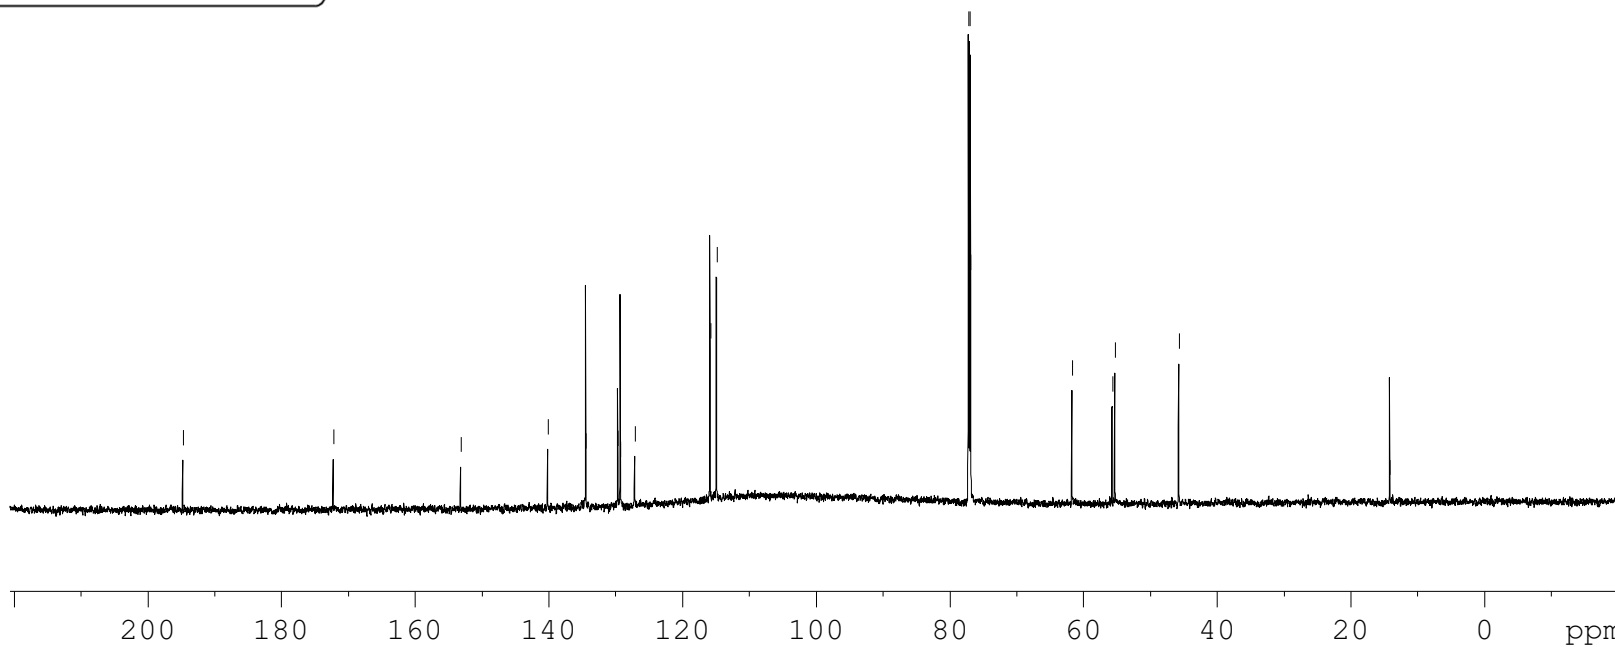

<sup>1</sup>H NMR, 600 MHz, CDCl<sub>3</sub>

CDCl<sub>3</sub>

7.940  
7.927  
7.581  
7.569  
7.557  
7.470  
7.457  
7.445  
7.256  
6.769  
6.755  
6.675  
6.661

4.536  
4.527  
4.518  
4.188  
4.176  
4.164  
4.152  
3.961  
3.949  
3.937  
3.926  
3.525  
3.517

1.368  
1.357  
1.345  
1.205  
1.193  
1.181

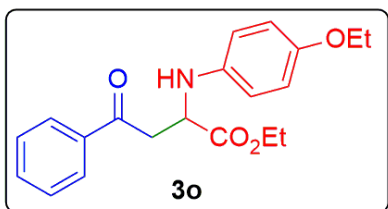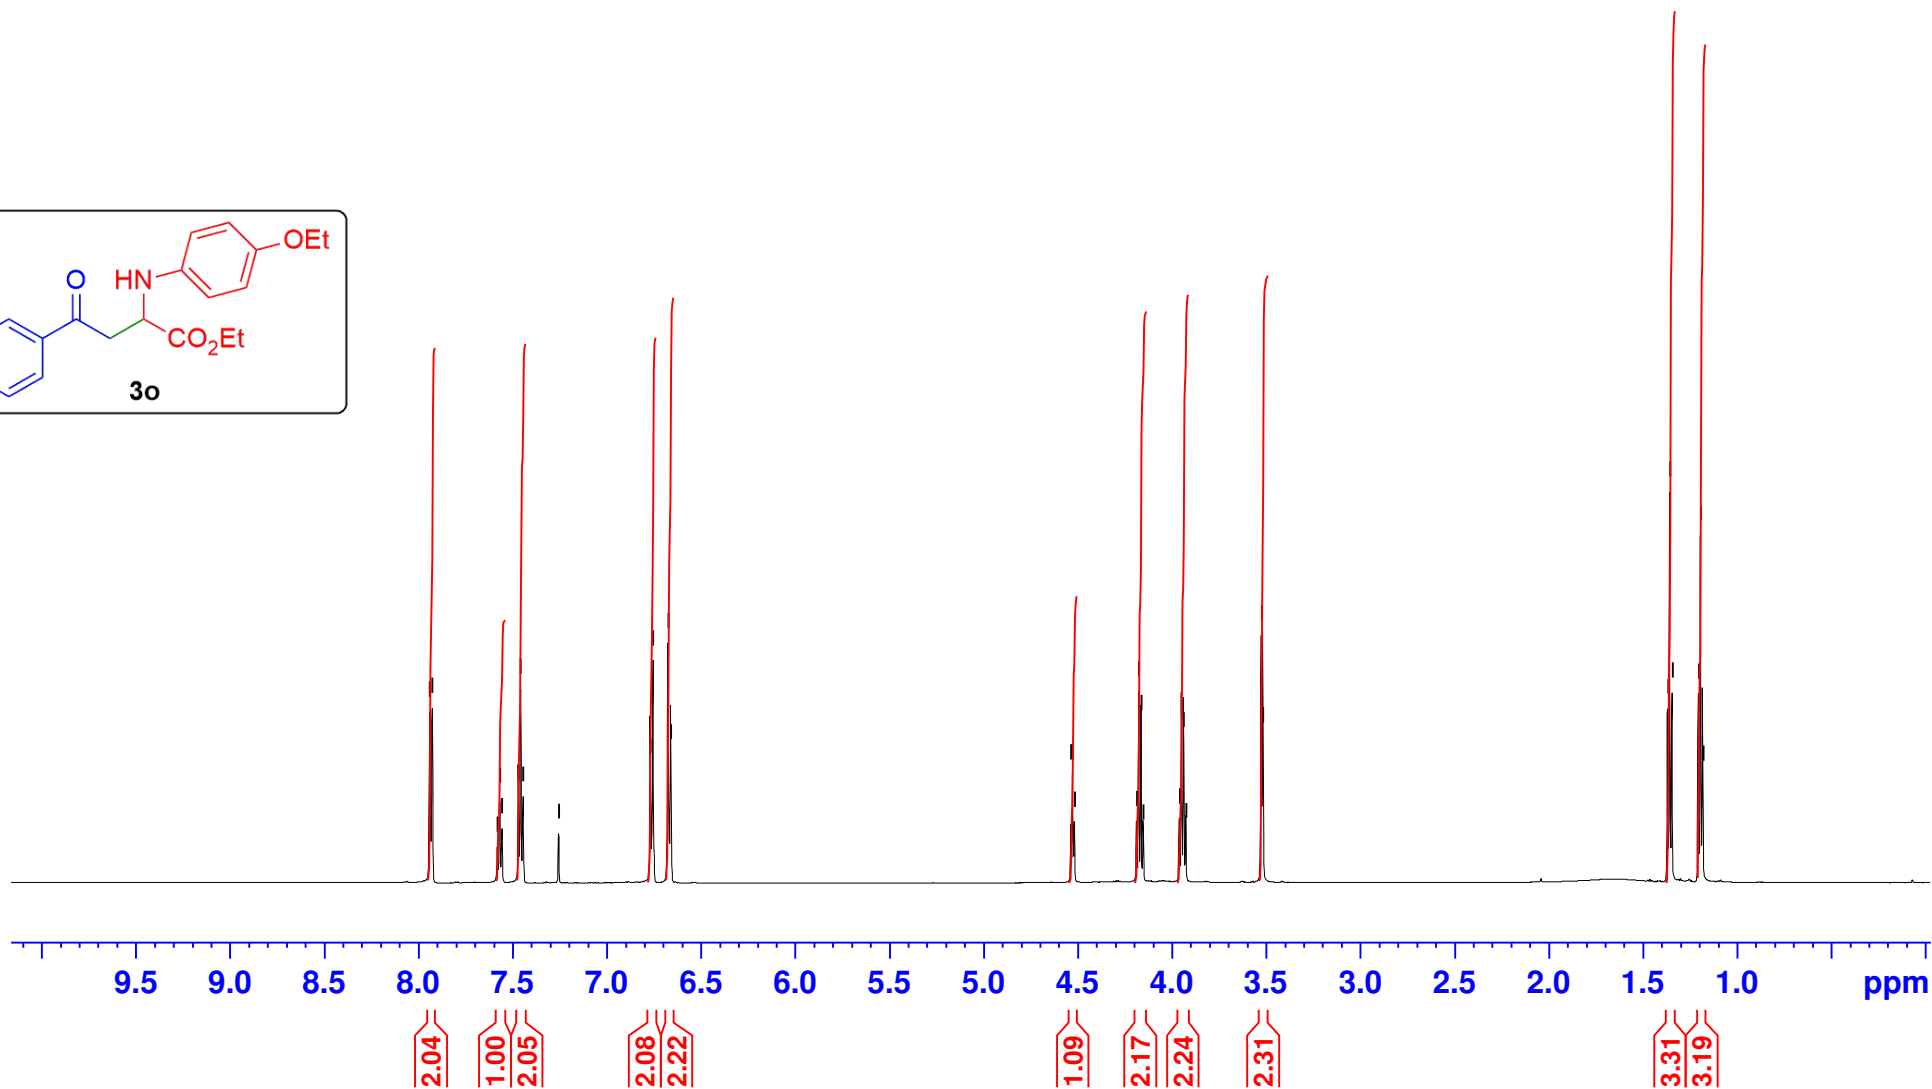

<sup>13</sup>C NMR, 201.2 MHz, CDCl<sub>3</sub>

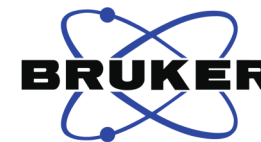

Current Data Parameters  
NAME barc-RC-2111-13C-2July21  
EXPNO 1  
PROCNO 1

F2 - Acquisition Parameters  
Date\_ 20210702  
Time 12.53 h  
INSTRUM spect  
PROBHD Z555801\_0012 ( )  
PULPROG zgdc  
TD 16384  
SOLVENT CDCl3  
NS 304  
DS 4  
SWH 48543.688 Hz  
FIDRES 5.925743 Hz  
AQ 0.1687552 sec  
RG 71.8  
DW 10.300 usec  
DE 6.50 usec  
TE 298.0 K  
D1 3.0000000 sec  
D11 0.0300000 sec  
TD0 1  
SFO1 201.1878208 MHz  
NUC1 13C  
P1 8.00 usec  
PLW1 312.79998779 W  
SFO2 800.0332001 MHz  
NUC2 1H  
CPDPRG2 waltz16  
PCPD2 60.00 usec  
PLW2 13.00000000 W  
PLW12 0.29249999 W

F2 - Processing parameters  
SI 16384  
SF 201.1677127 MHz  
WDW EM  
SSB 0  
LB 5.00 Hz  
GB 0  
PC 1.40

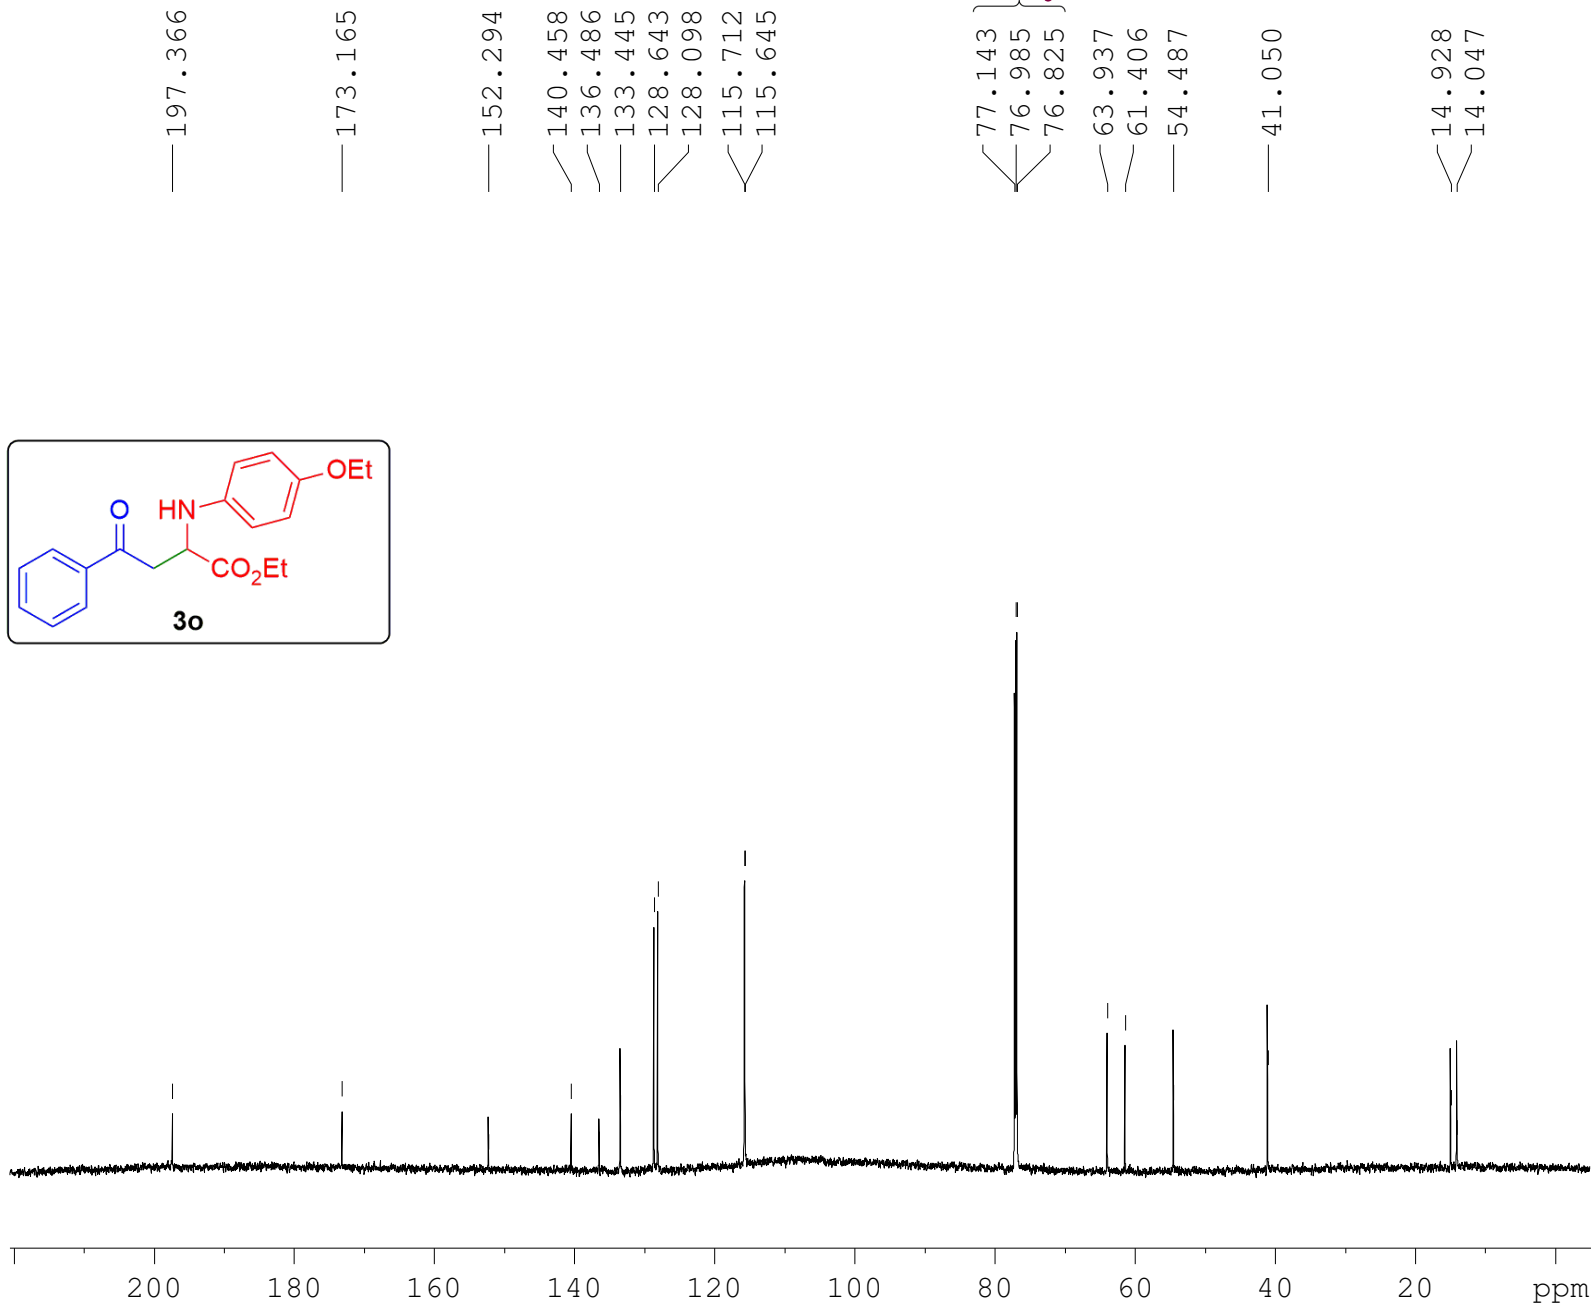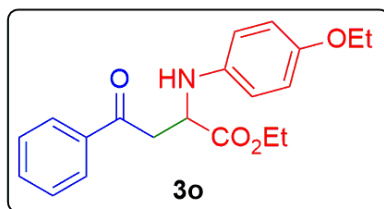

<sup>1</sup>H NMR, 600 MHz, CDCl<sub>3</sub>

CDCl<sub>3</sub>

7.942  
7.929  
7.585  
7.573  
7.561  
7.473  
7.460  
7.447  
7.256  
7.190  
7.178  
7.165  
6.759  
6.747  
6.735  
6.698  
6.685

4.625  
4.616  
4.608  
4.205  
4.194  
4.182  
4.170  
3.598  
3.590  
3.570  
3.562  
3.554  
3.534  
3.525

1.584  
1.213  
1.202  
1.190

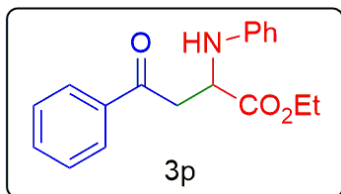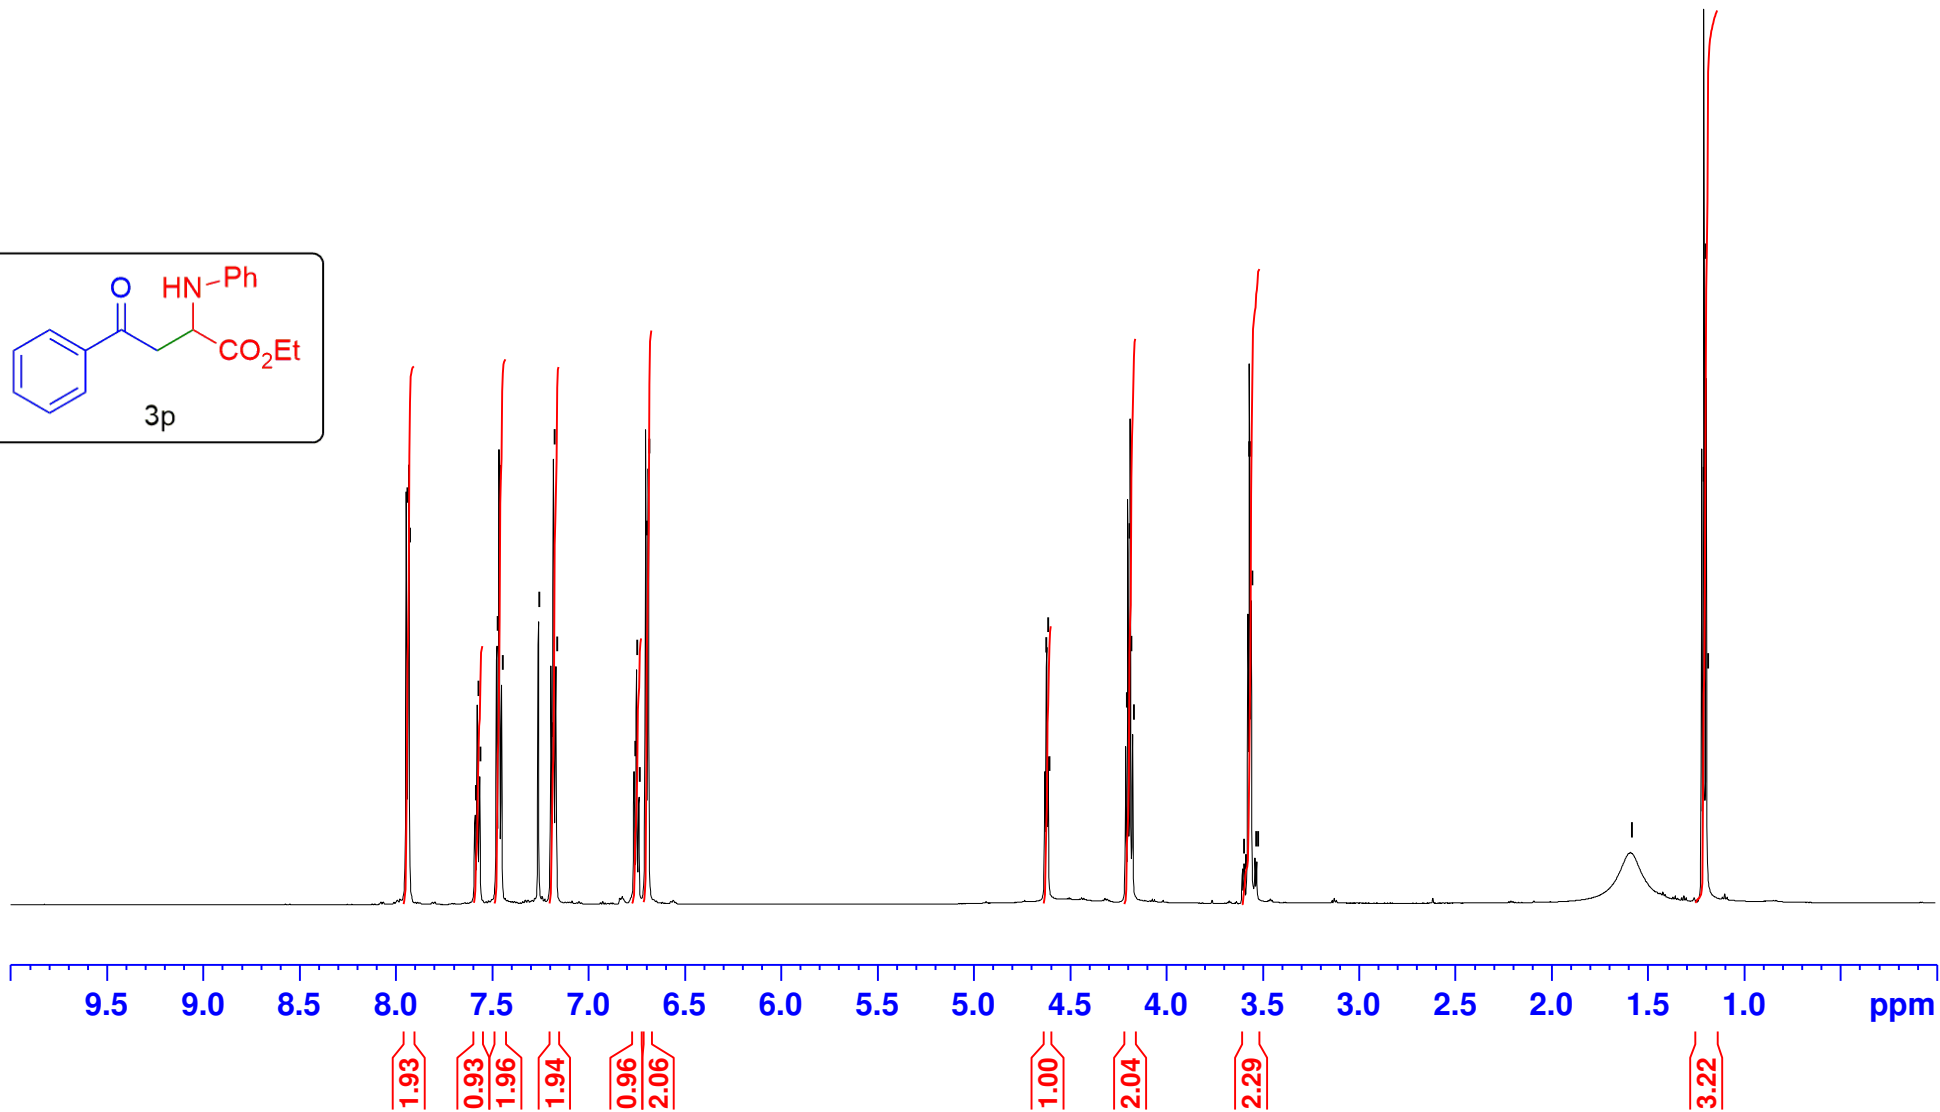

# <sup>13</sup>C NMR, 201.2 MHz, CDCl<sub>3</sub>

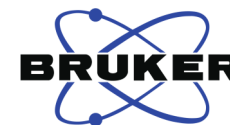

Current Data Parameters  
NAME barc-RC-2124-13C-2July21  
EXPNO 1  
PROCNO 1

F2 - Acquisition Parameters  
Date\_ 20210702  
Time 15.26 h  
INSTRUM spect  
PROBHD 2555801\_0012 ( )  
PULPROG zgdc  
TD 16384  
SOLVENT CDCl3  
NS 339  
DS 4  
SWH 48543.688 Hz  
FIDRES 5.925743 Hz  
AQ 0.1687552 sec  
RG 71.8  
DW 10.300 usec  
DE 6.50 usec  
TE 298.0 K  
D1 3.0000000 sec  
D11 0.0300000 sec  
TD0 1  
SF01 201.1878208 MHz  
NUC1 13C  
P1 8.00 usec  
PLW1 312.79998779 W  
SF02 800.0322001 MHz  
NUC2 1H  
CPDPRG2 waltz16  
PCPD2 60.00 usec  
PLW2 13.00000000 W  
PLW12 0.29249999 W  
F2 - Processing parameters  
SI 16384  
SF 201.1671710 MHz  
WDW EM  
SSB 0  
LB 5.00 Hz  
GB 0  
PC 1.40

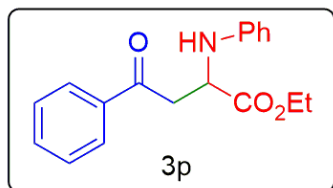

— 197.286  
— 172.820  
— 146.394  
— 136.408  
— 133.480  
— 129.309  
— 128.647  
— 128.086  
— 118.508  
— 113.686  
— 77.148  
— 76.990  
— 76.832  
— 61.500  
— 53.002  
— 40.834  
— 14.025

CDCl<sub>3</sub>

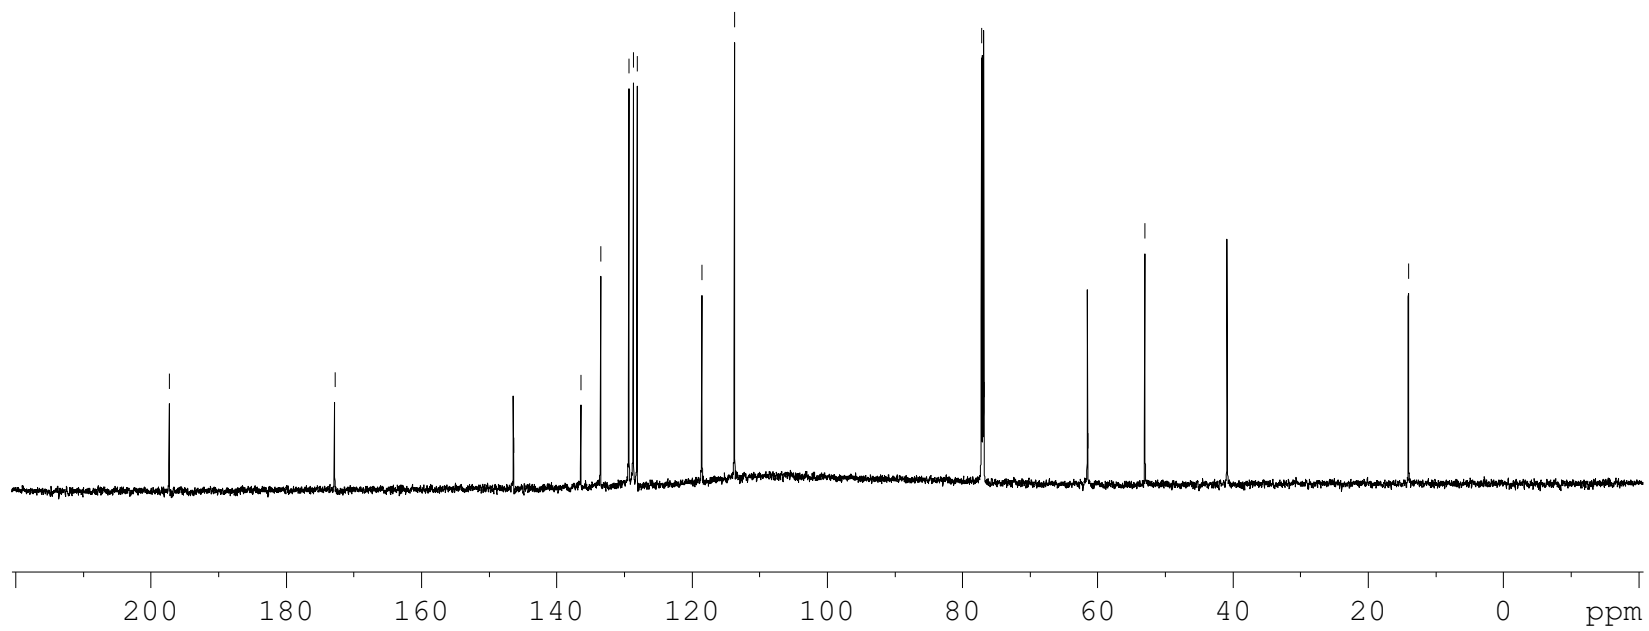



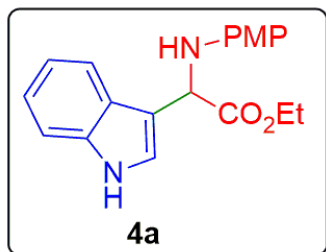

**$^1\text{H NMR}$ , 600 MHz,  $\text{CDCl}_3$**

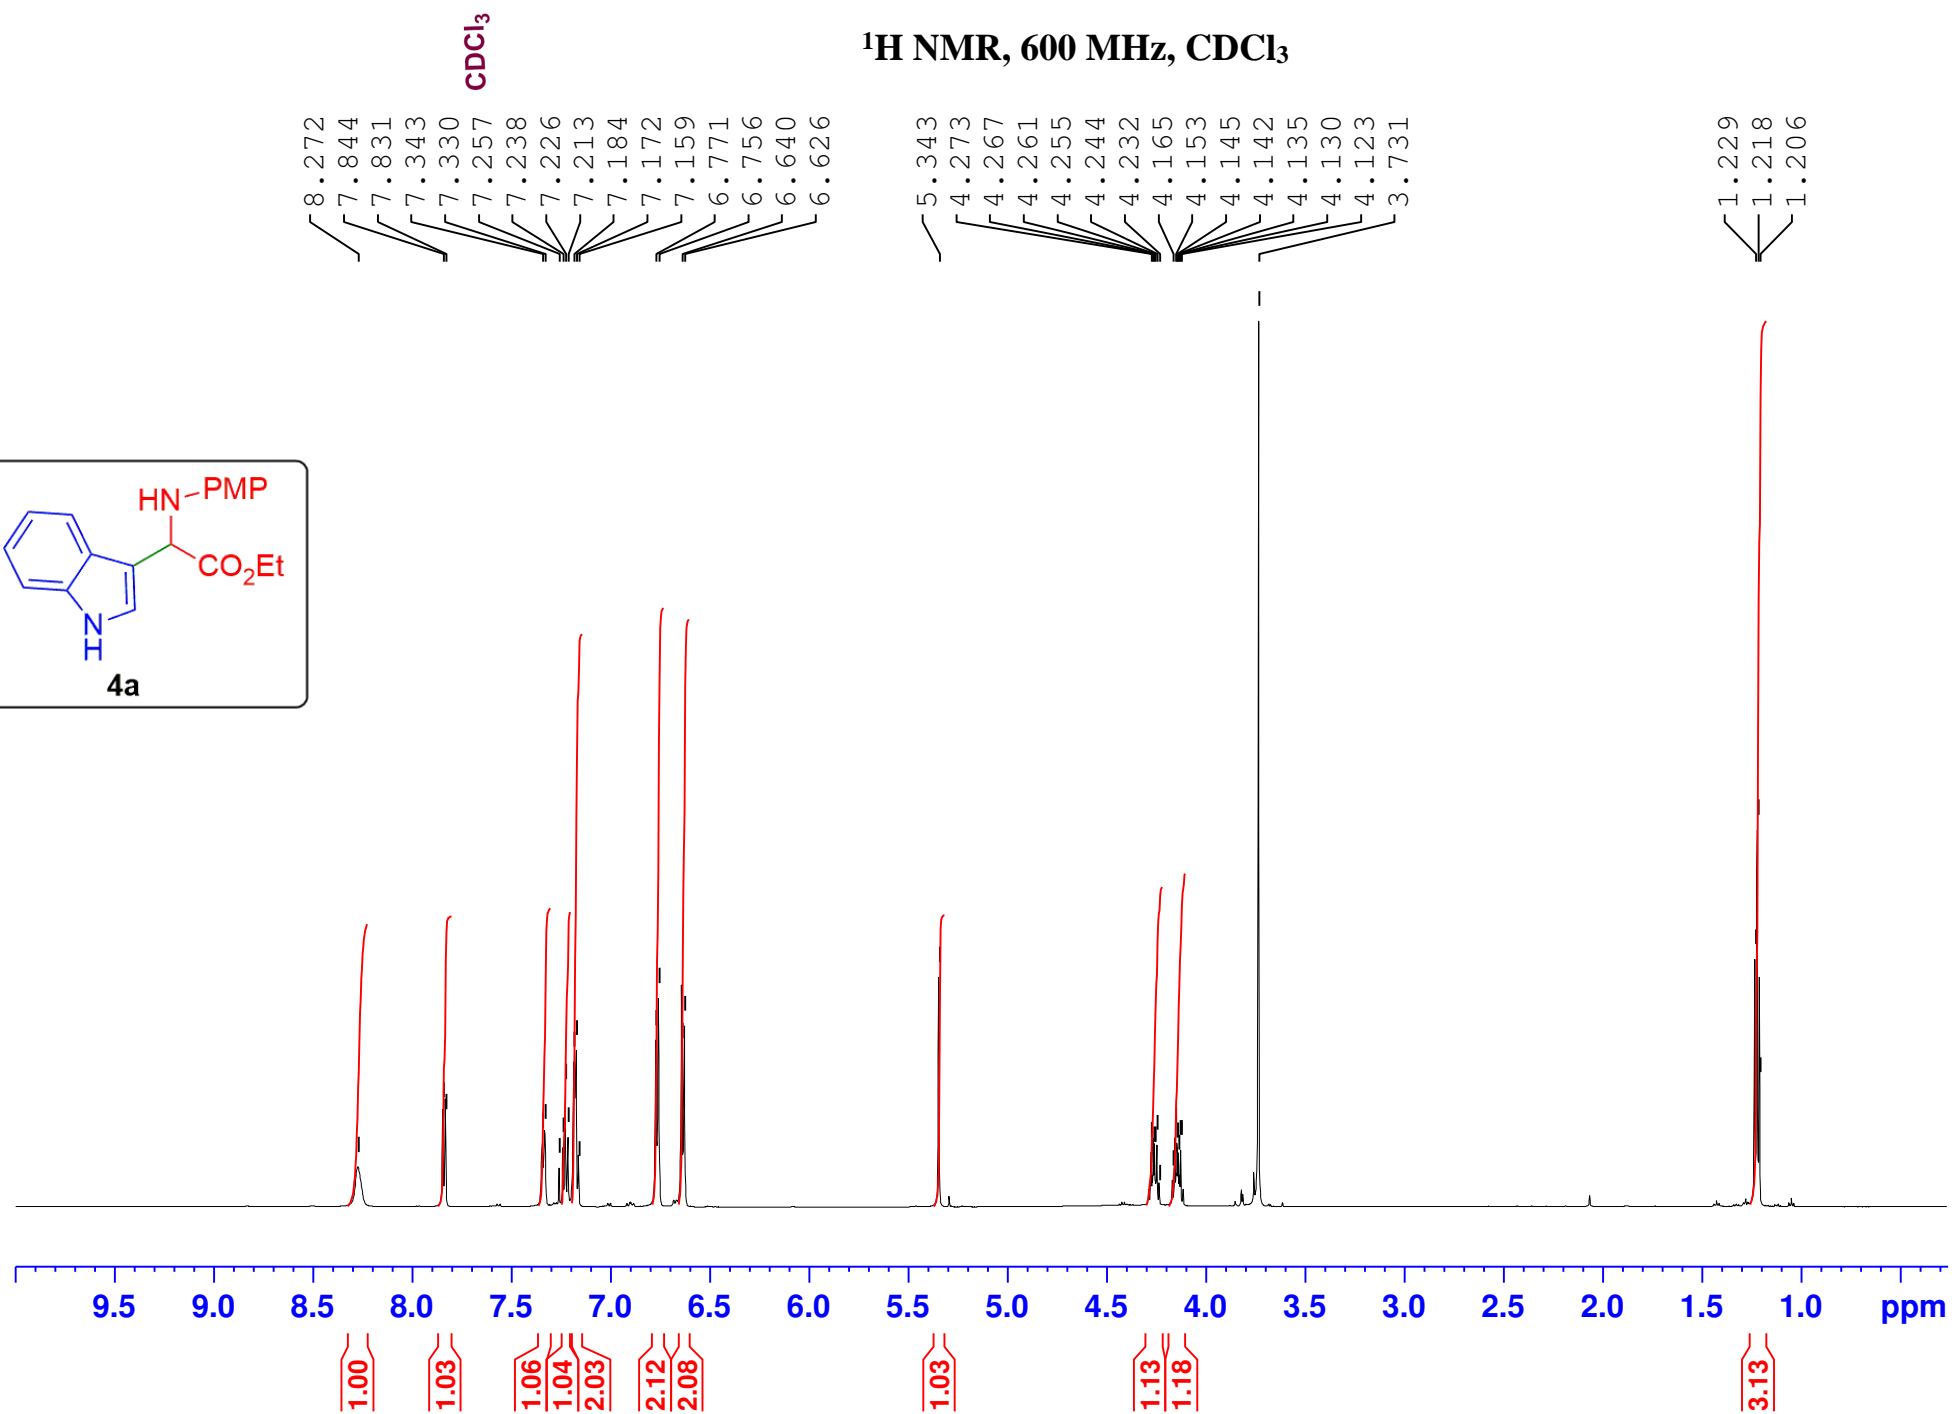

<sup>13</sup>C NMR, 201.2 MHz, CDCl<sub>3</sub>

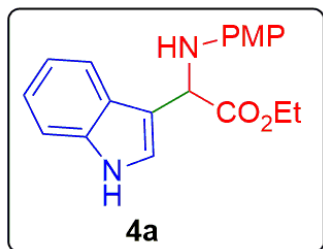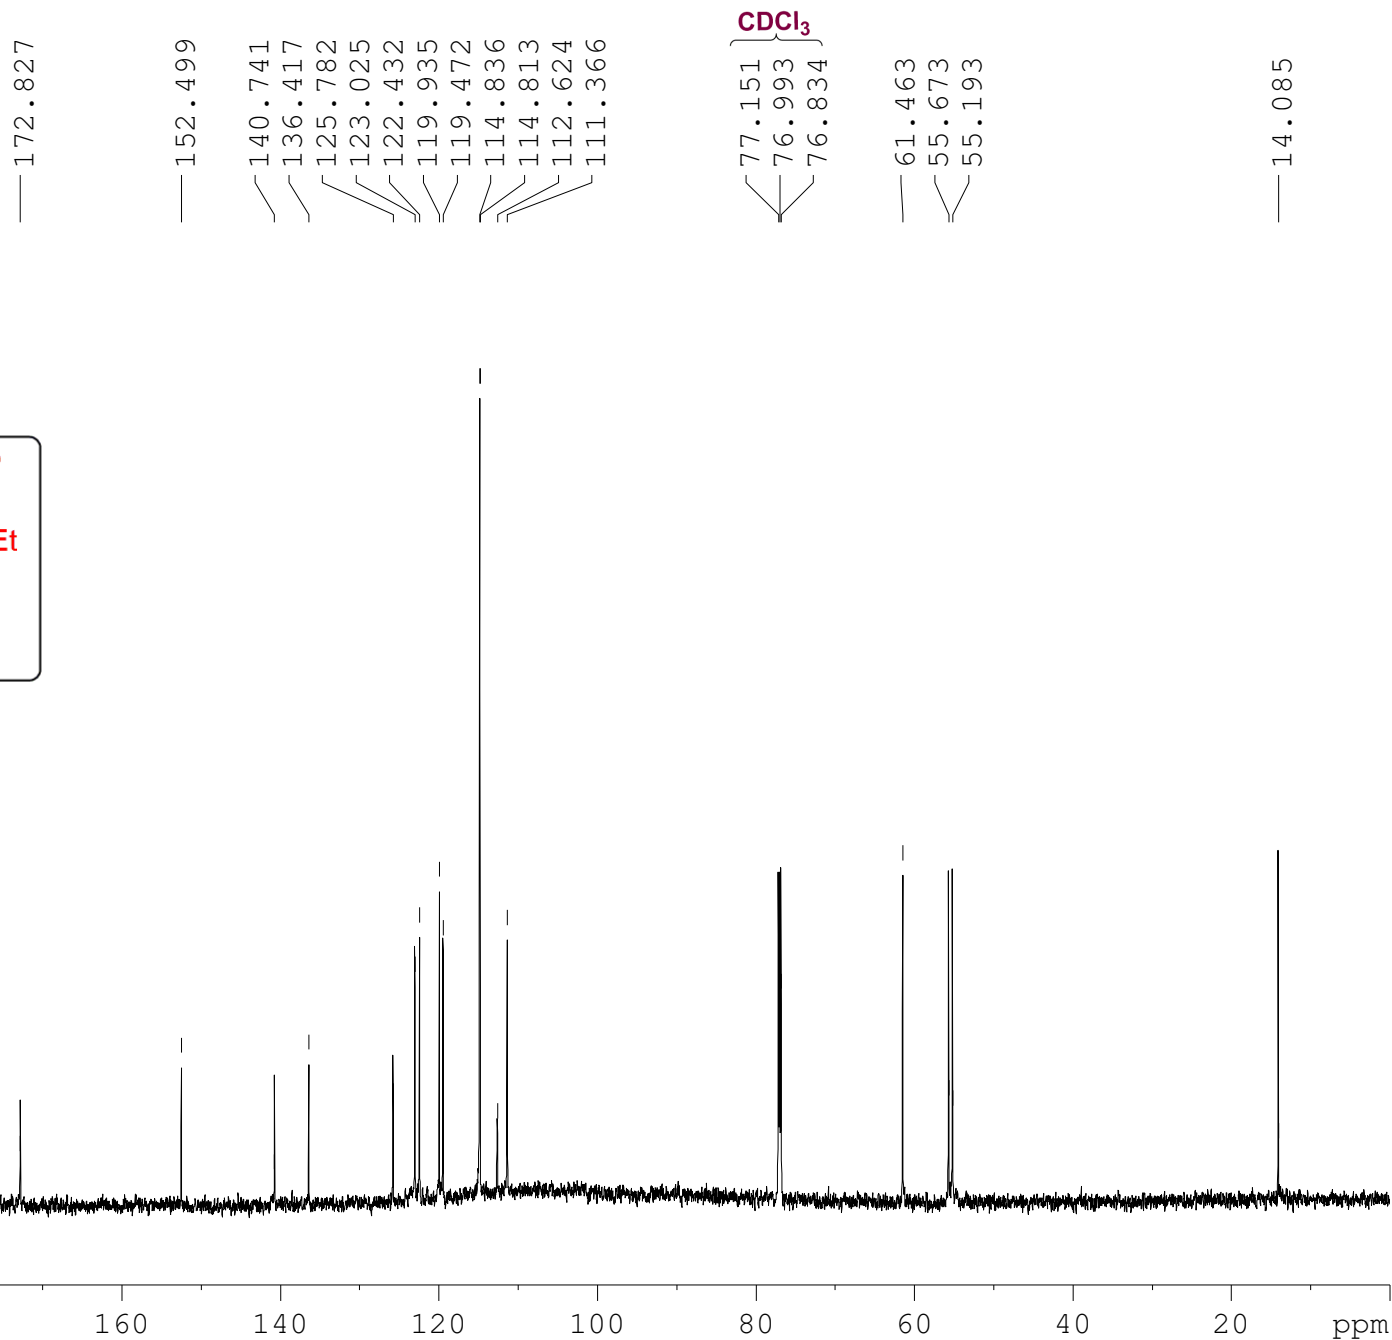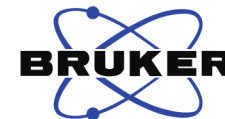

Current Data Parameters  
NAME barc-RC2179-13C-25Aug21  
EXPNO 1  
PROCNO 1

F2 - Acquisition Parameters  
Date\_ 20210825  
Time 14.55 h  
INSTRUM spect  
PROBHD Z555801\_0012 (  
PULPROG zgdc  
TD 16384  
SOLVENT CDCl3  
NS 108  
DS 4  
SWH 48543.688 Hz  
FIDRES 5.925743 Hz  
AQ 0.1687552 sec  
RG 71.8  
DW 10.300 usec  
DE 6.50 usec  
TE 298.0 K  
D1 3.0000000 sec  
D11 0.0300000 sec  
TD0 1  
SFO1 201.1878208 MHz  
NUC1 13C  
P1 8.00 usec  
PLW1 312.79998779 W  
SFO2 800.0332001 MHz  
NUC2 1H  
CPDPRG[2] waltz16  
PCPD2 60.00 usec  
PLW2 13.0000000 W  
PLW12 0.29249999 W

F2 - Processing parameters  
SI 16384  
SF 201.1677189 MHz  
WDW EM  
SSB 0  
LB 5.00 Hz  
GB 0  
PC 1.40

<sup>1</sup>H NMR, 600 MHz, CDCl<sub>3</sub>

CDCl<sub>3</sub>

7.815  
7.802  
7.316  
7.302  
7.268  
7.255  
7.243  
7.169  
7.157  
7.144  
7.113  
6.753  
6.739  
6.627  
6.613

5.308  
4.278  
4.266  
4.253  
4.248  
4.236  
4.225  
4.161  
4.148  
4.135  
4.123  
4.117  
4.106  
4.094  
3.743  
3.721

1.227  
1.215  
1.204

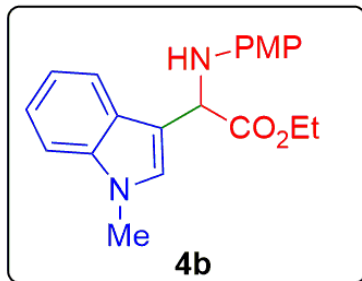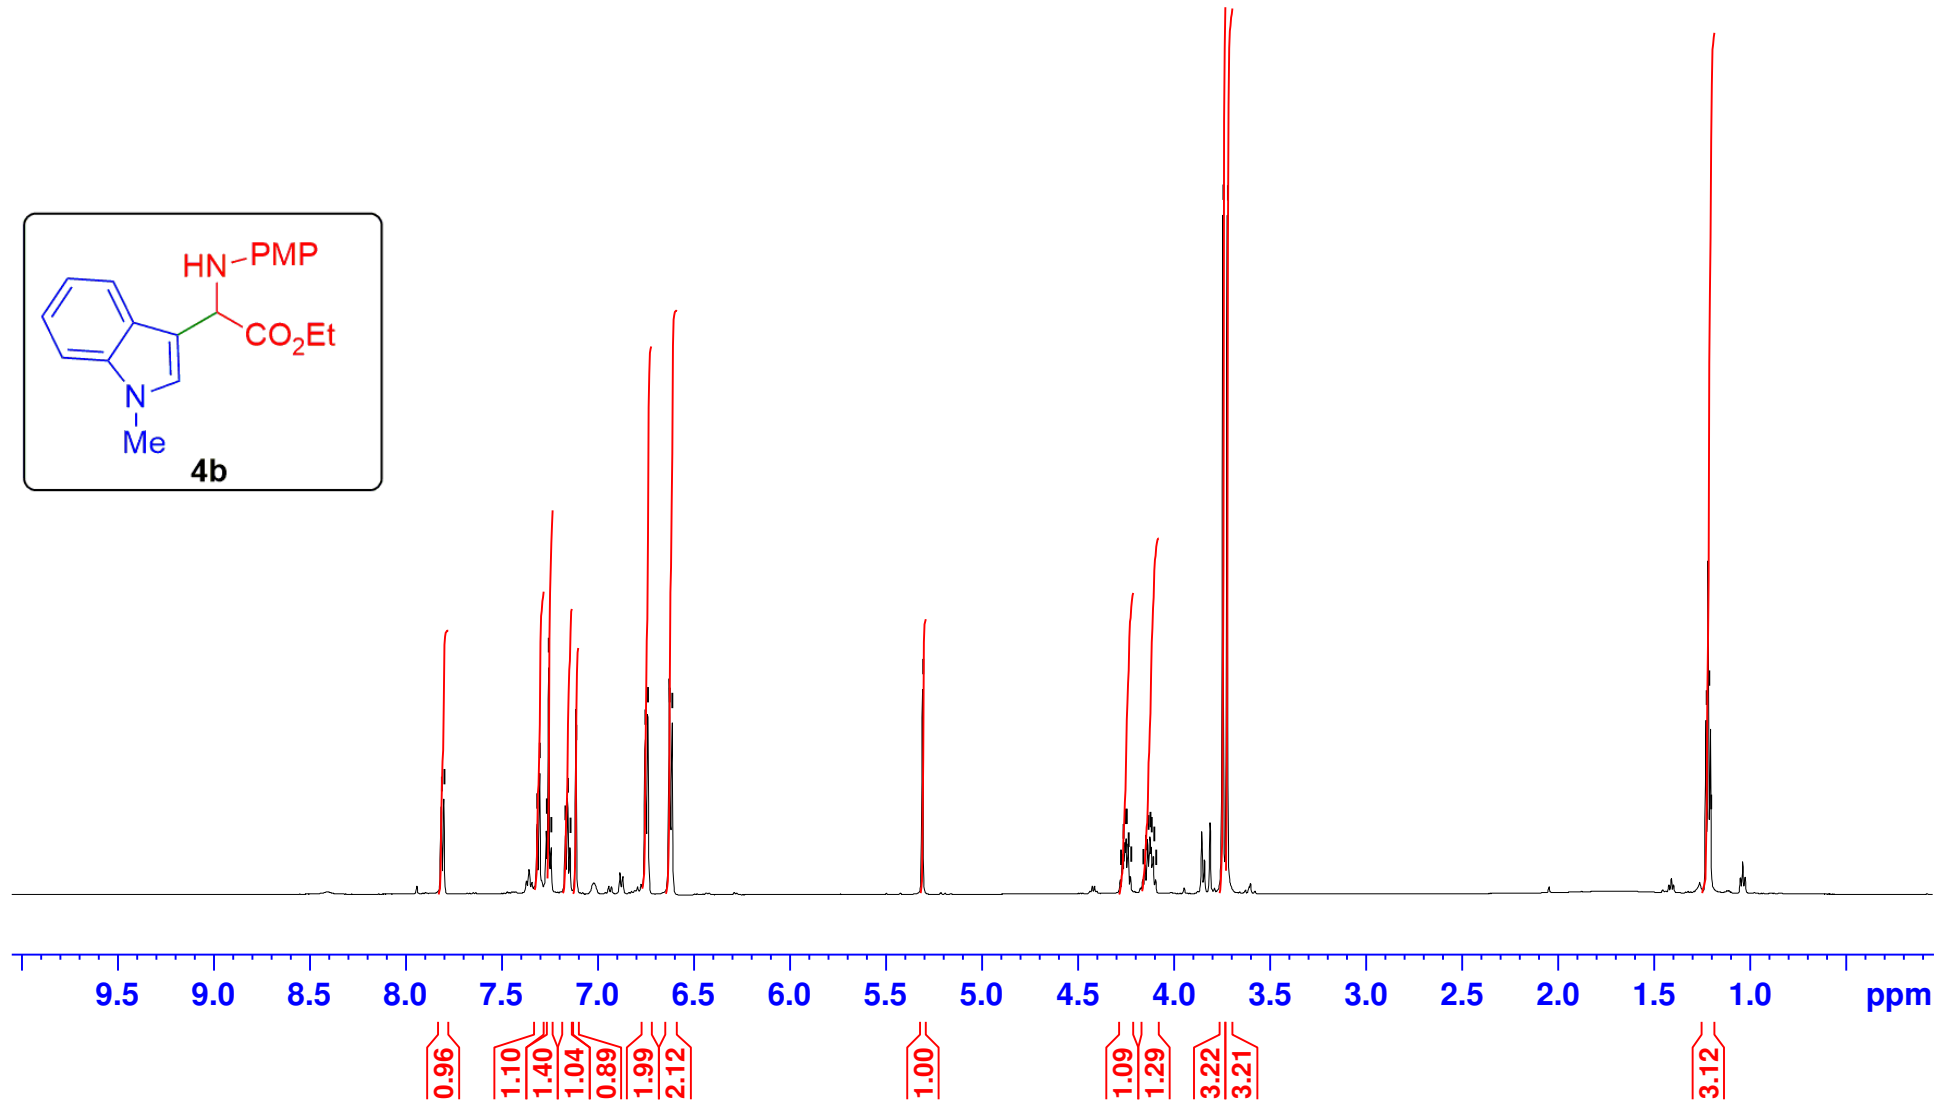

<sup>13</sup>C NMR, 201.2 MHz, CDCl<sub>3</sub>

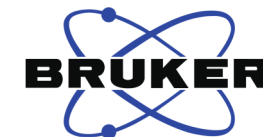

Current Data Parameters  
NAME barc-RC-2183-13C-23Sep21  
EXPNO 1  
PROCNO 1

F2 - Acquisition Parameters  
Date\_ 20210923  
Time 13.51 h  
INSTRUM spect  
PROBHD Z555801\_0012 (  
PULPROG zgdc  
TD 16384  
SOLVENT CDCl3  
NS 120  
DS 4  
SWH 48543.688 Hz  
FIDRES 5.925743 Hz  
AQ 0.1687552 sec  
RG 71.8  
DW 10.300 usec  
DE 6.50 usec  
TE 298.0 K  
D1 3.0000000 sec  
D11 0.03000000 sec  
TD0 1  
SFO1 201.1878208 MHz  
NUC1 13C  
P1 8.00 usec  
PLW1 312.7998779 W  
SFO2 800.0332001 MHz  
NUC2 1H  
CPDPRG[2] waltz16  
PCPDZ 60.00 usec  
PLW2 13.00000000 W  
PLW12 0.29249999 W

F2 - Processing parameters  
SI 16384  
SF 201.1677200 MHz  
WDW EM  
SSB 0  
LB 5.00 Hz  
GB 0  
FC 1.40

— 172.835  
— 152.443  
— 140.812  
— 137.223  
— 127.497  
— 126.282  
— 121.979  
— 119.598  
— 119.481  
— 114.773  
— 114.734  
— 111.079  
— 109.425  
} CDCl<sub>3</sub>  
77.152  
76.993  
76.834  
61.392  
55.650  
55.088  
— 32.796  
— 14.099

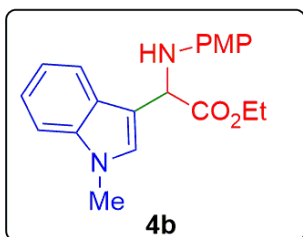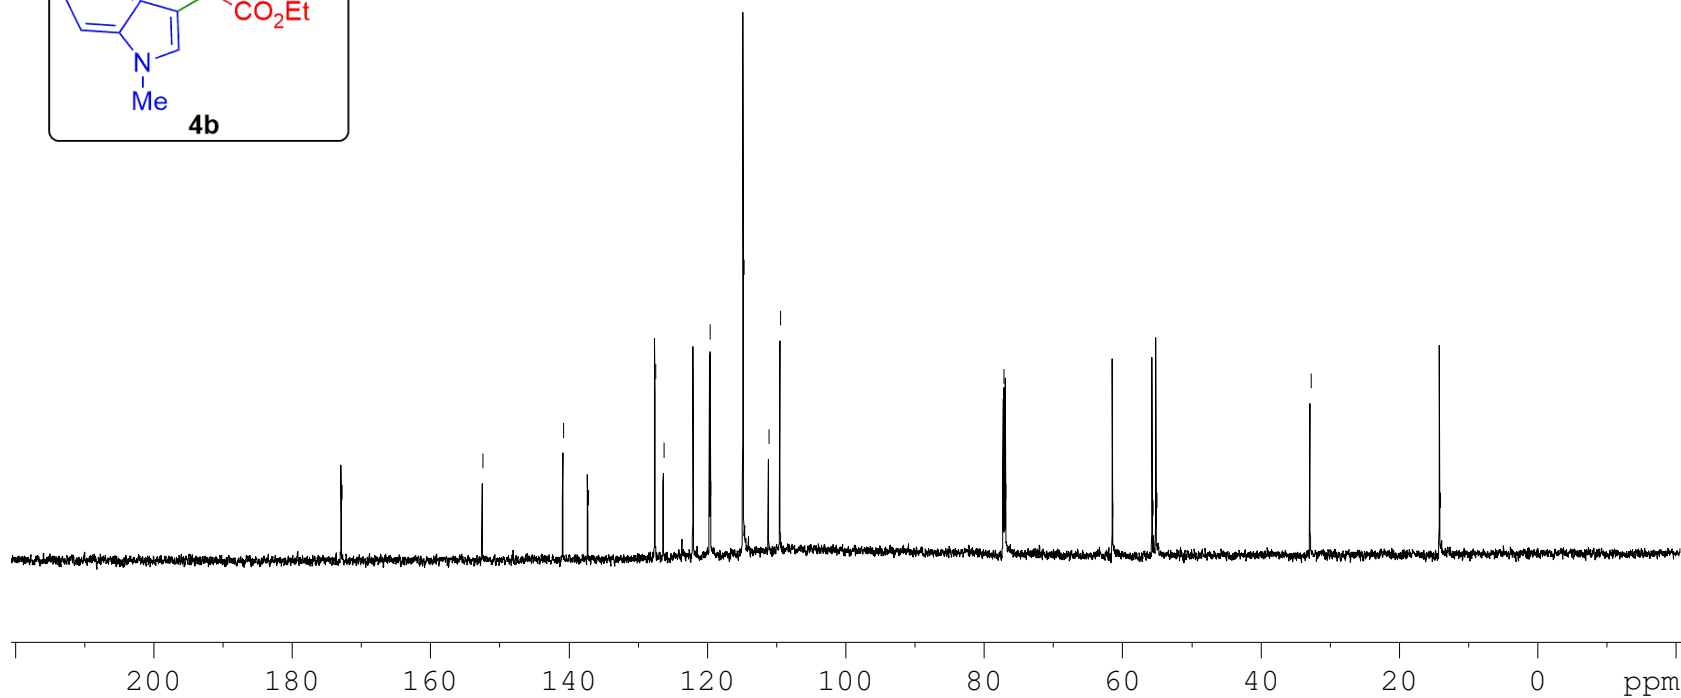

<sup>1</sup>H NMR, 600 MHz, CDCl<sub>3</sub>

CDCl<sub>3</sub>

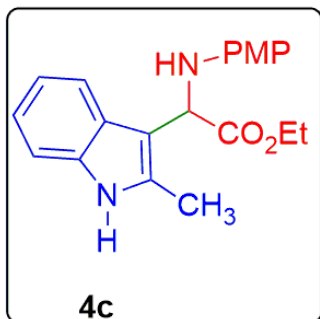

4c

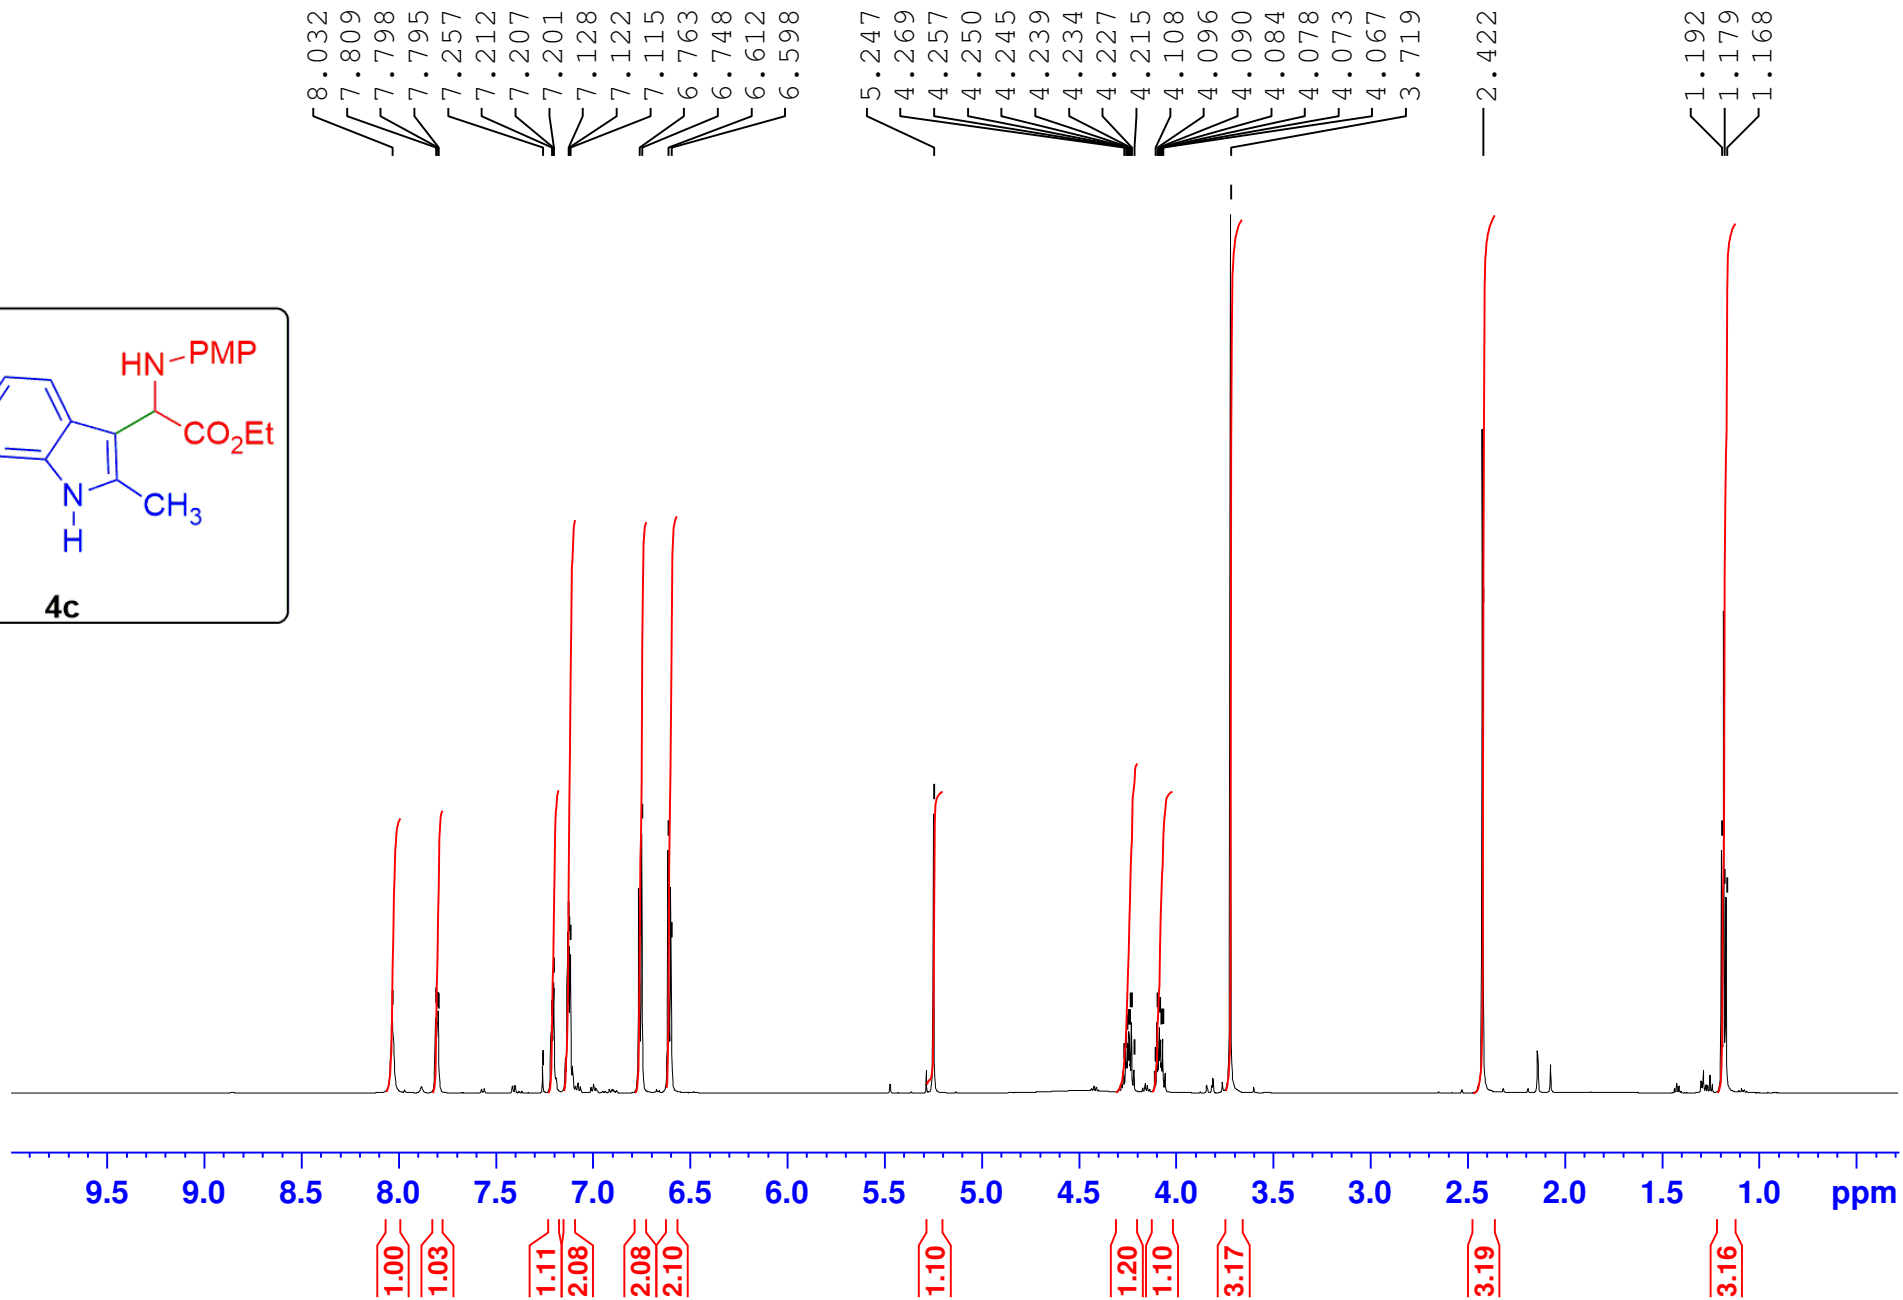

<sup>13</sup>C NMR, 201.2 MHz, CDCl<sub>3</sub>

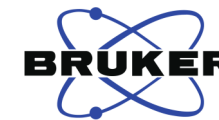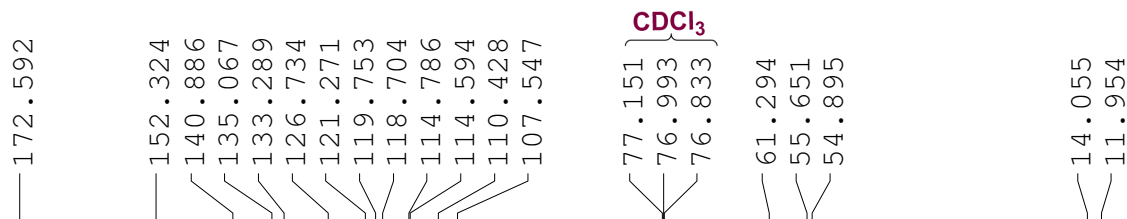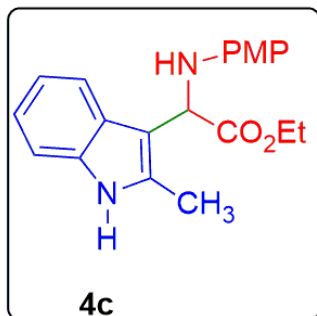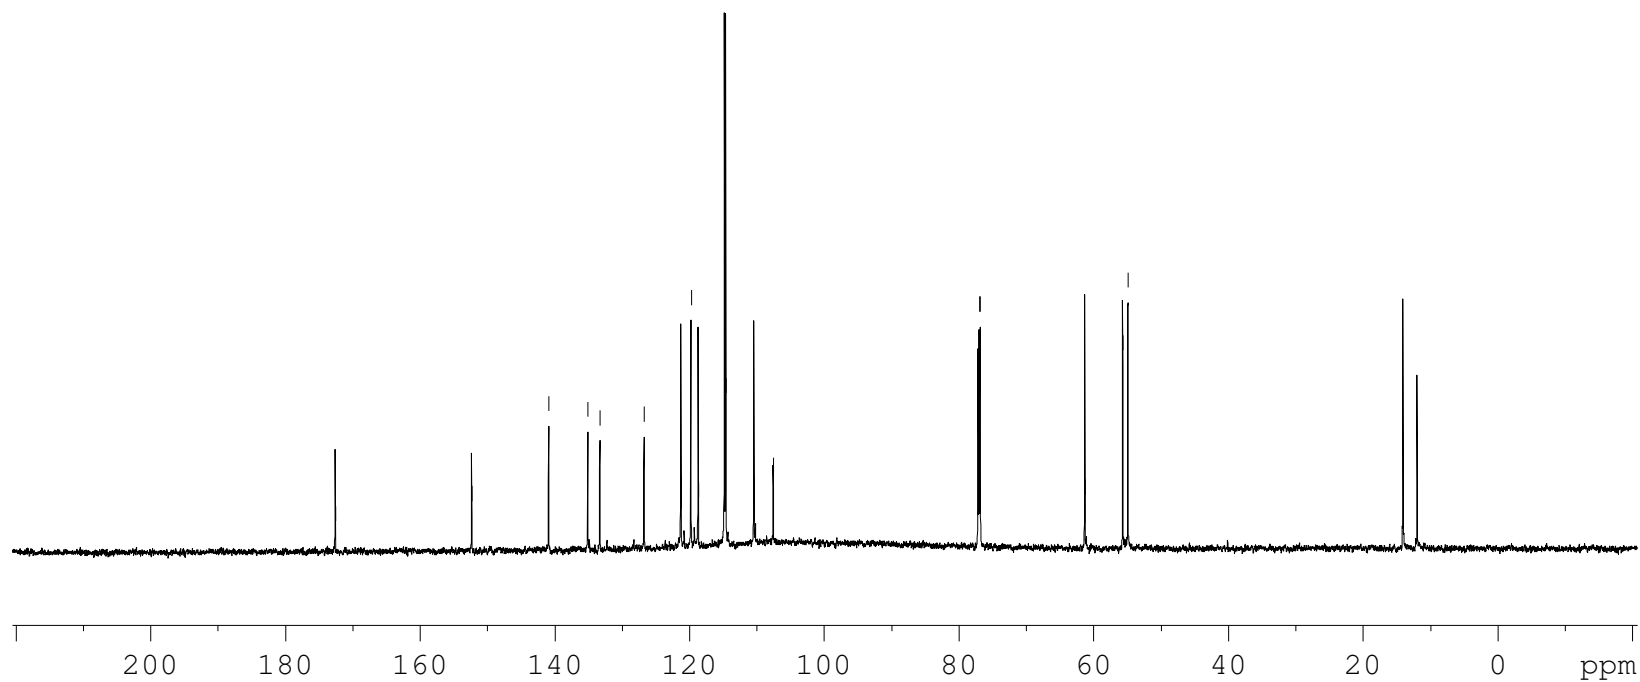

Current Data Parameters  
NAME barc-RC2163-13C-25Aug21  
EXPNO 1  
PROCNO 1

F2 - Acquisition Parameters  
Date\_ 20210825  
Time 14.08 h  
INSTRUM spect  
PROBHD 2555801\_0012 ( )  
PULPROG zgdc  
TD 16384  
SOLVENT CDCl3  
NS 133  
DS 4  
SWH 48543.688 Hz  
FIDRES 5.925743 Hz  
AQ 0.1687552 sec  
RG 71.8  
DW 10.300 usec  
DE 6.50 usec  
TE 298.1 K  
D1 3.0000000 sec  
D11 0.03000000 sec  
TDO 1  
SFO1 201.1878208 MHz  
NUC1 13C  
P1 8.00 usec  
PLW1 312.79998779 W  
SFO2 800.0332001 MHz  
NUC2 1H  
CPDPRG2 waltz16  
PCPD2 60.00 usec  
PLW2 13.00000000 W  
PLW12 0.29249999 W

F2 - Processing parameters  
SI 16384  
SF 201.1677260 MHz  
WDW EM  
SSB 0  
LB 5.00 Hz  
GB 0  
PC 1.40

<sup>1</sup>H NMR, 600 MHz, CDCl<sub>3</sub>

CDCl<sub>3</sub>

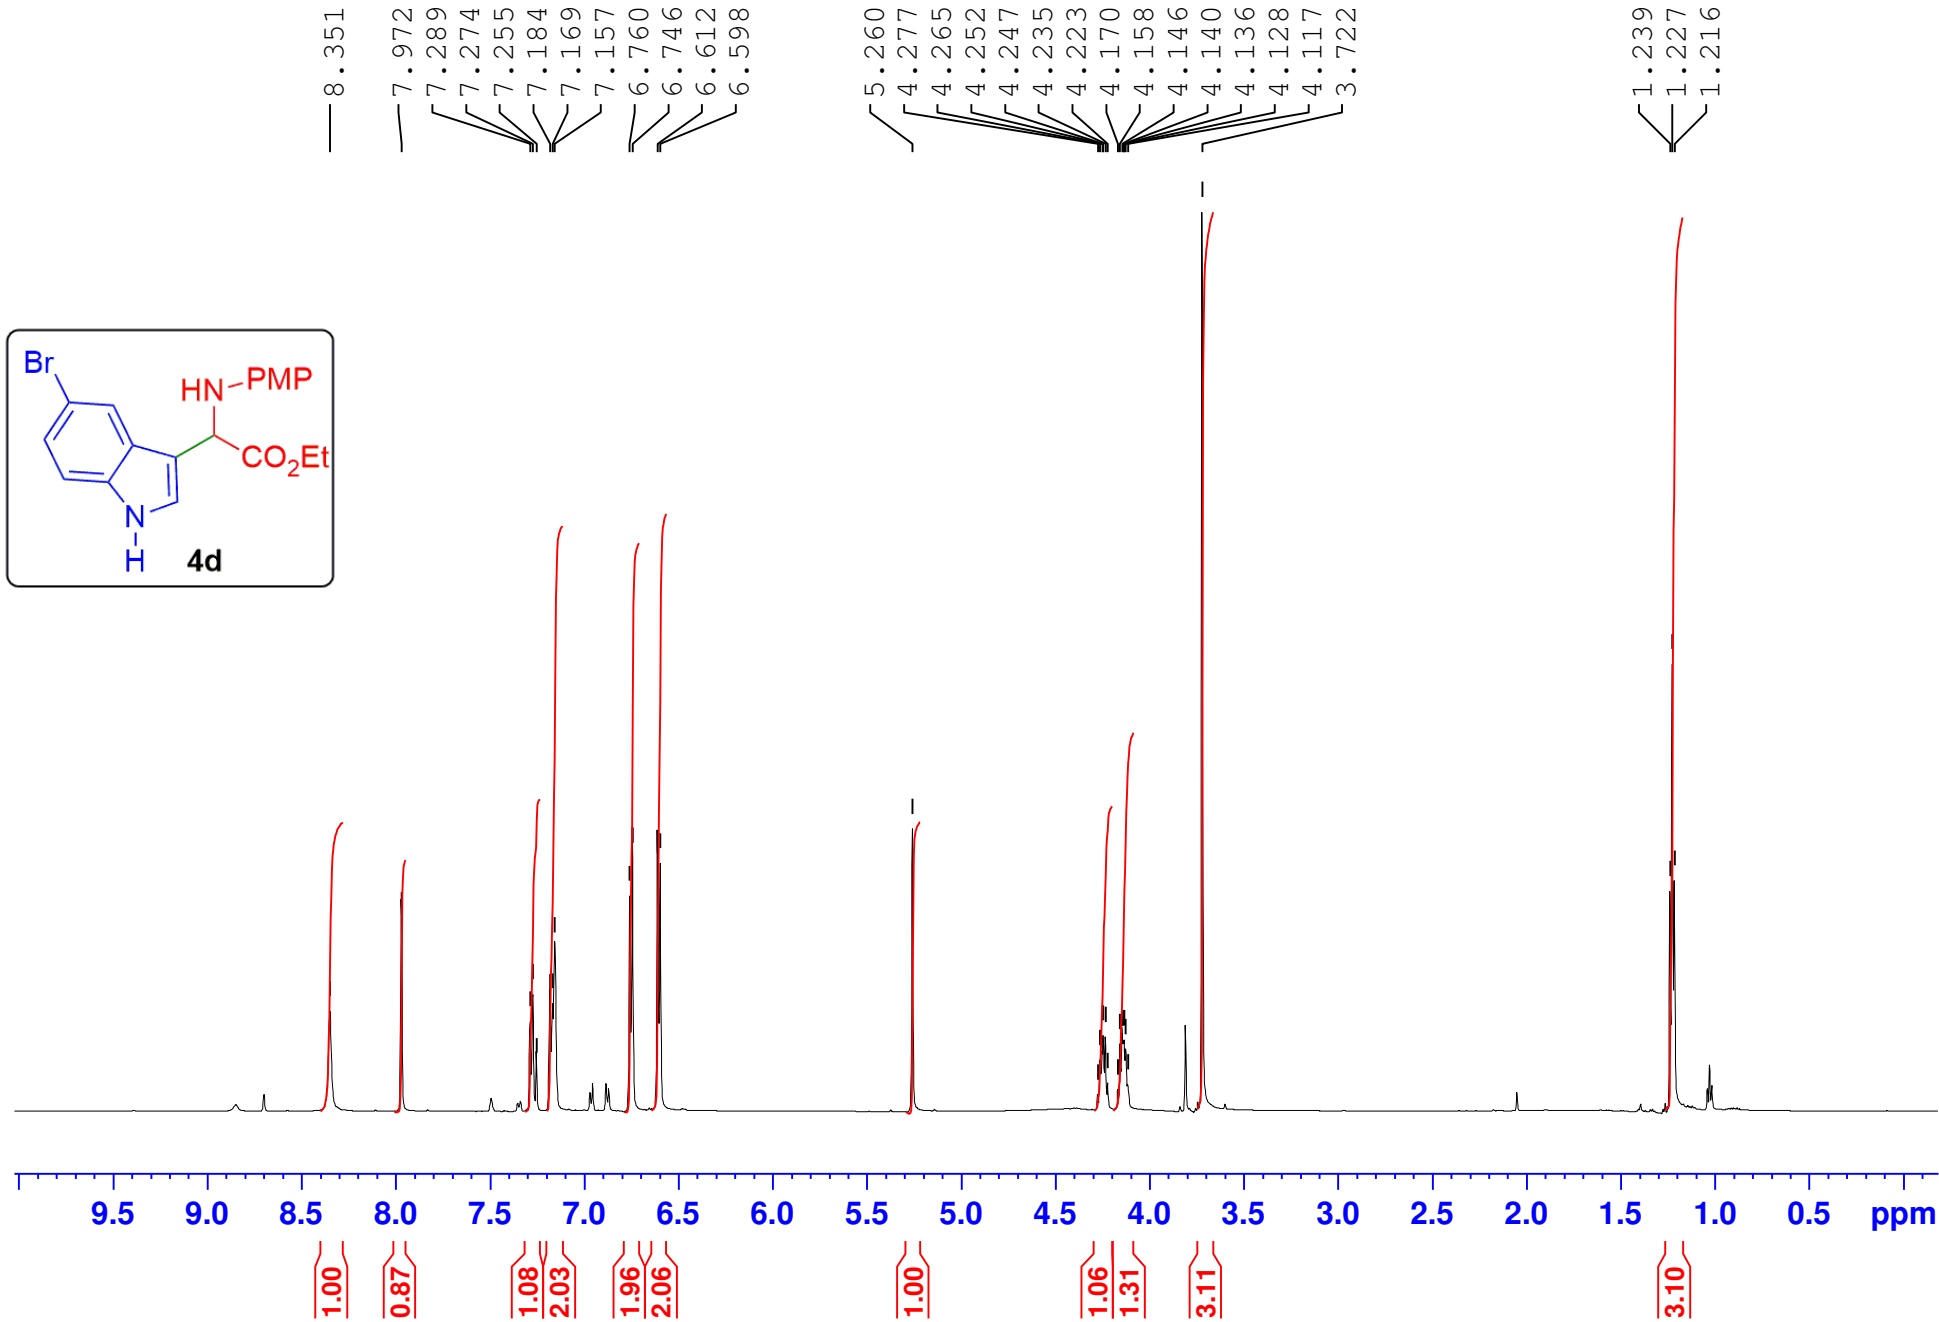

<sup>13</sup>C NMR, 201.2 MHz, CDCl<sub>3</sub>

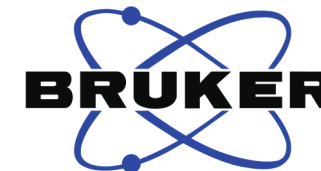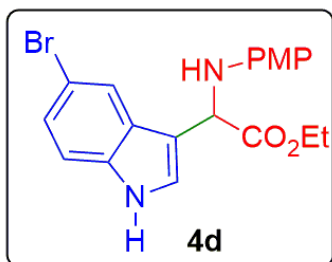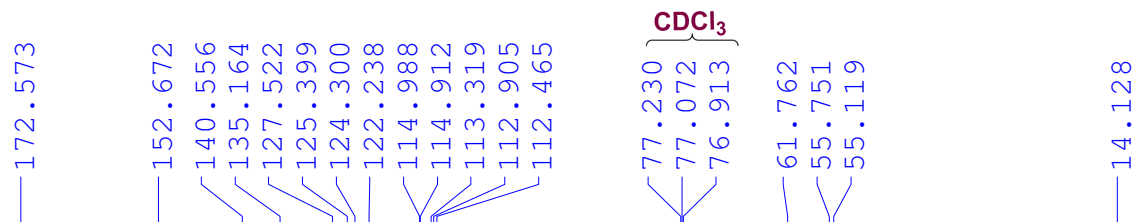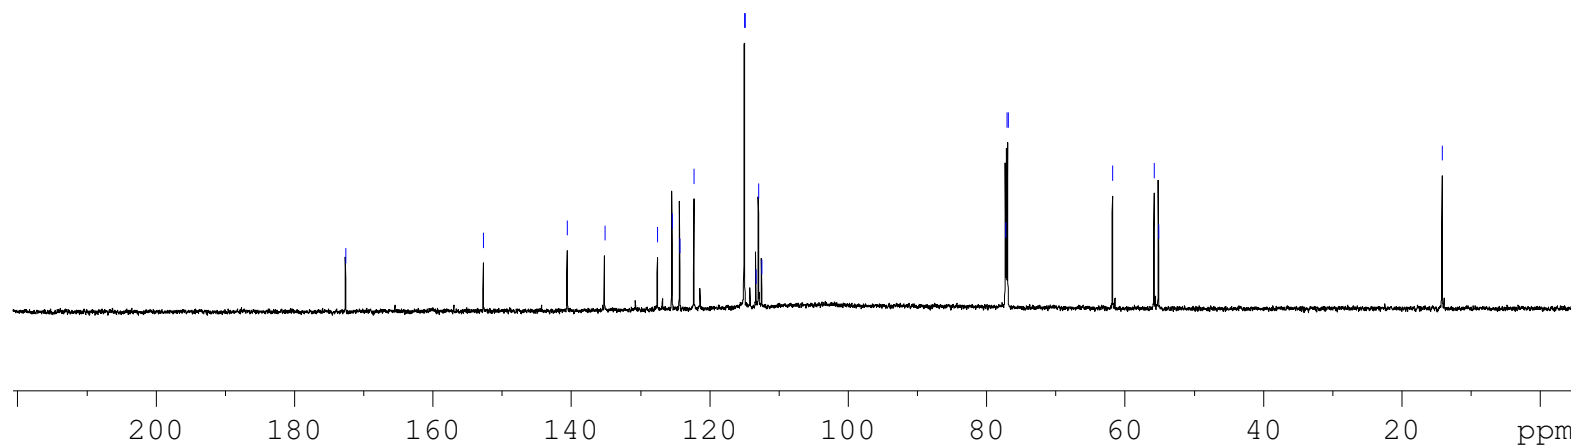

Current Data Parameters  
NAME barc-RC-2505-13C-Feb22  
EXPNO 3  
PROCNO 1

F2 - Acquisition Parameters  
Date\_ 20220209  
Time 12.59 h  
INSTRUM spect  
PROBHD Z555801\_0012 (   
PULPROG zgdc  
TD 16384  
SOLVENT CDCl3  
NS 180  
DS 4  
SWH 48543.688 Hz  
FIDRES 5.925743 Hz  
AQ 0.1687552 sec  
RG 71.8  
DW 10.300 usec  
DE 6.50 usec  
TE 298.0 K  
D1 3.0000000 sec  
D11 0.0300000 sec  
TDO 1  
SFO1 201.1878208 MHz  
NUC1 13C  
P1 9.00 usec  
PLW1 312.79998779 W  
SFO2 800.0332001 MHz  
NUC2 1H  
CPDPRG2 waltz16  
PCPD2 60.00 usec  
PLW2 13.0000000 W  
PLW12 0.29249999 W

F2 - Processing parameters  
SI 16384  
SF 201.1677040 MHz  
WDW EM  
SSB 0  
LB 5.00 Hz  
GB 0  
PC 1.40



<sup>1</sup>H NMR, 600 MHz, CDCl<sub>3</sub>

CDCl<sub>3</sub>

8.276  
7.490  
7.474  
7.255  
7.240  
7.233  
7.216  
6.973  
6.970  
6.958  
6.956  
6.942  
6.760  
6.746  
6.619  
6.605  
5.258  
4.280  
4.267  
4.261  
4.255  
4.249  
4.238  
4.226  
4.171  
4.159  
4.147  
4.141  
4.135  
4.130  
4.118  
3.722  
1.230  
1.218  
1.206

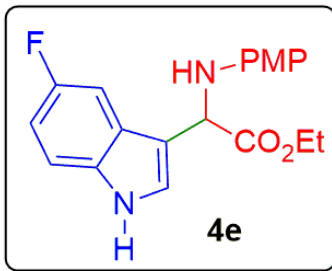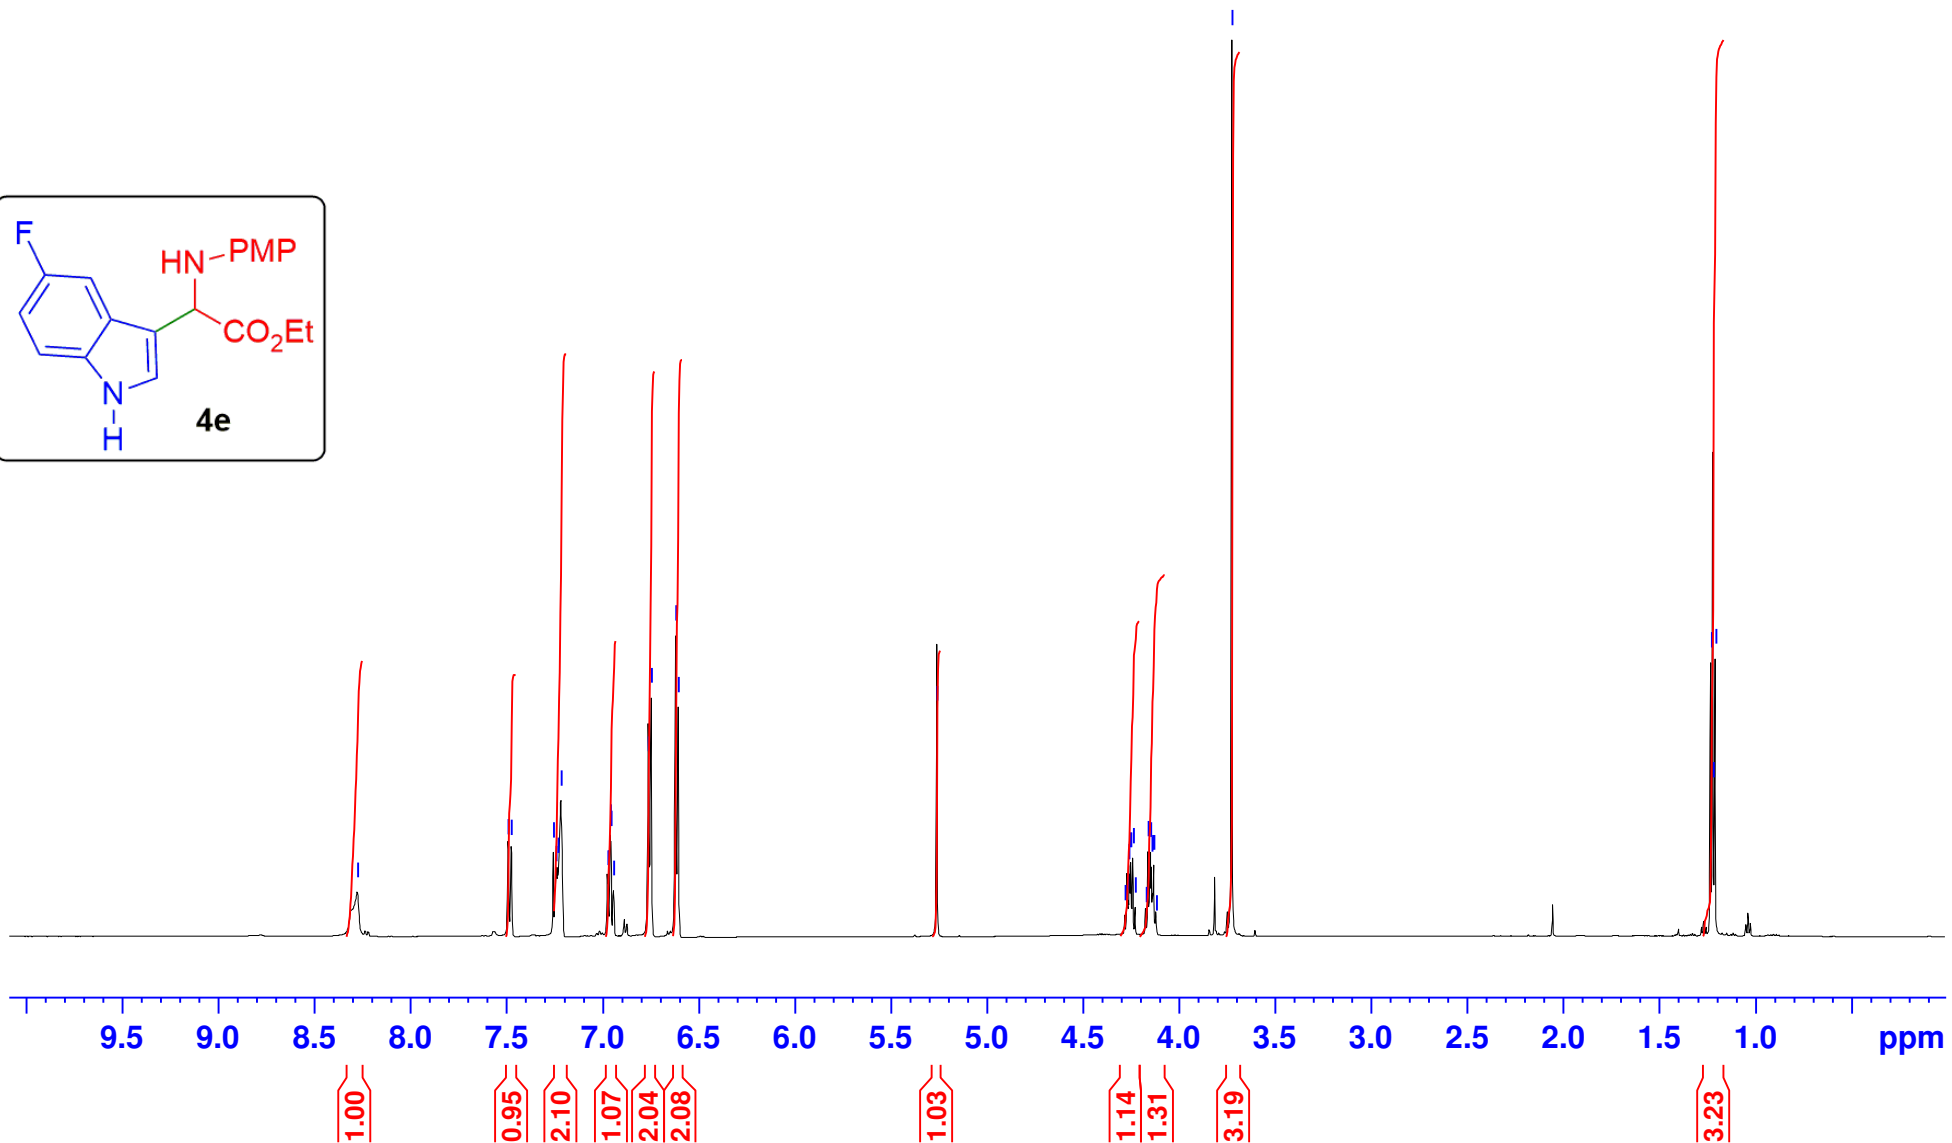

<sup>13</sup>C NMR, 201.2 MHz, CDCl<sub>3</sub>

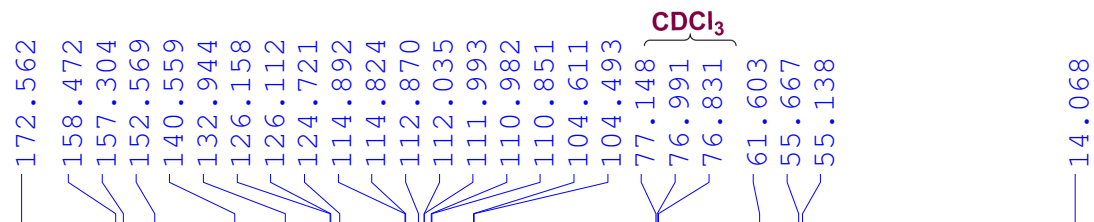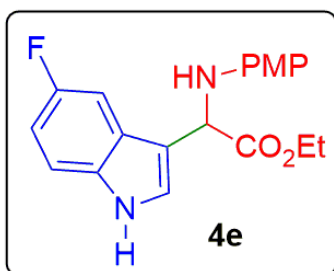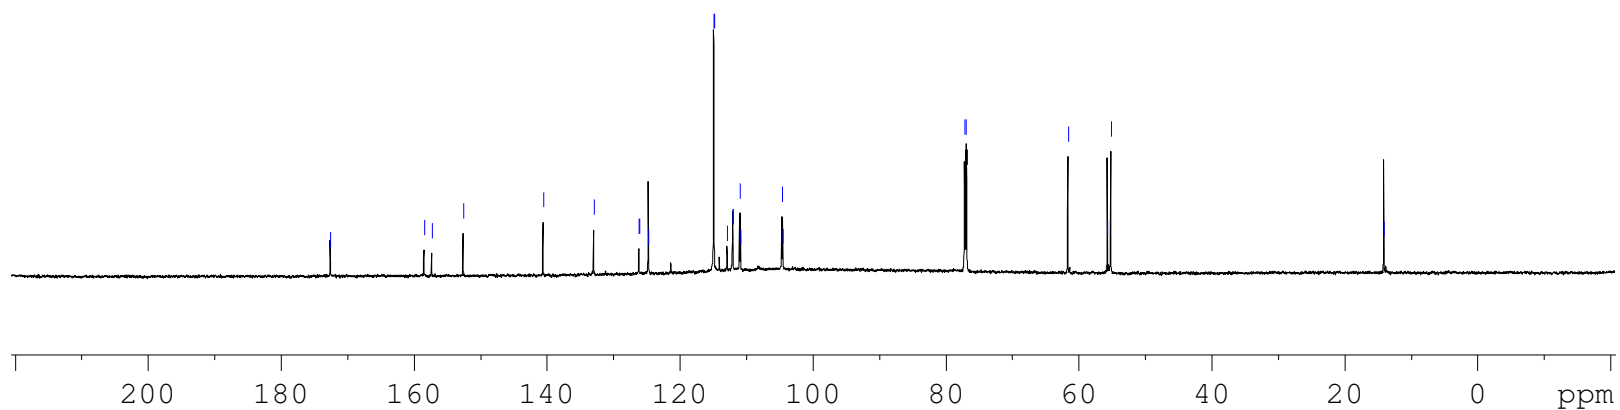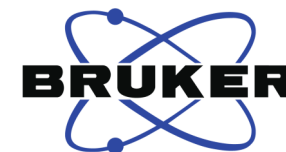

Current Data Parameters  
NAME barc-RC-2506-13C-Feb22  
EXPNO 4  
PROCNO 1

F2 - Acquisition Parameters  
Date\_ 20220209  
Time 13.31 h  
INSTRUM spect  
PROBHD z555801\_0012 ( )  
PULPROG zgdc  
TD 16384  
SOLVENT CDCl3  
NS 474  
DS 4  
SWH 48543.688 Hz  
FIDRES 5.925743 Hz  
AQ 0.1687552 sec  
RG 71.8  
DW 10.300 usec  
DE 6.50 usec  
TE 298.1 K  
D1 3.0000000 sec  
D11 0.0300000 sec  
TD0 1  
SFO1 201.1878208 MHz  
NUC1 13C  
P1 9.00 usec  
PLW1 312.79998779 W  
SFO2 800.0332001 MHz  
NUC2 1H  
CPDPRG2 waltz16  
PCPD2 60.00 usec  
PLW2 13.0000000 W  
PLW12 0.29249999 W

F2 - Processing parameters  
SI 16384  
SF 201.1677173 MHz  
WDW EM  
SSB 0  
LB 5.00 Hz  
GB 0  
PC 1.40

<sup>1</sup>H NMR, 600 MHz, CDCl<sub>3</sub>

CDCl<sub>3</sub>

8.212  
7.260  
7.257  
7.216  
7.201  
7.148  
7.145  
6.888  
6.884  
6.873  
6.870  
6.773  
6.759  
6.639  
6.624  
5.288  
4.286  
4.274  
4.267  
4.263  
4.256  
4.251  
4.244  
4.232  
4.170  
4.158  
4.152  
4.146  
4.140  
4.134  
4.128  
4.117  
3.861  
3.729

1.238  
1.227  
1.215

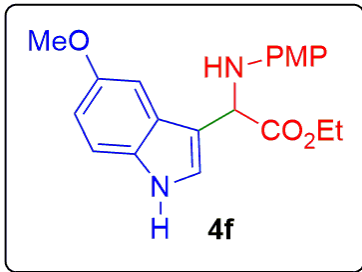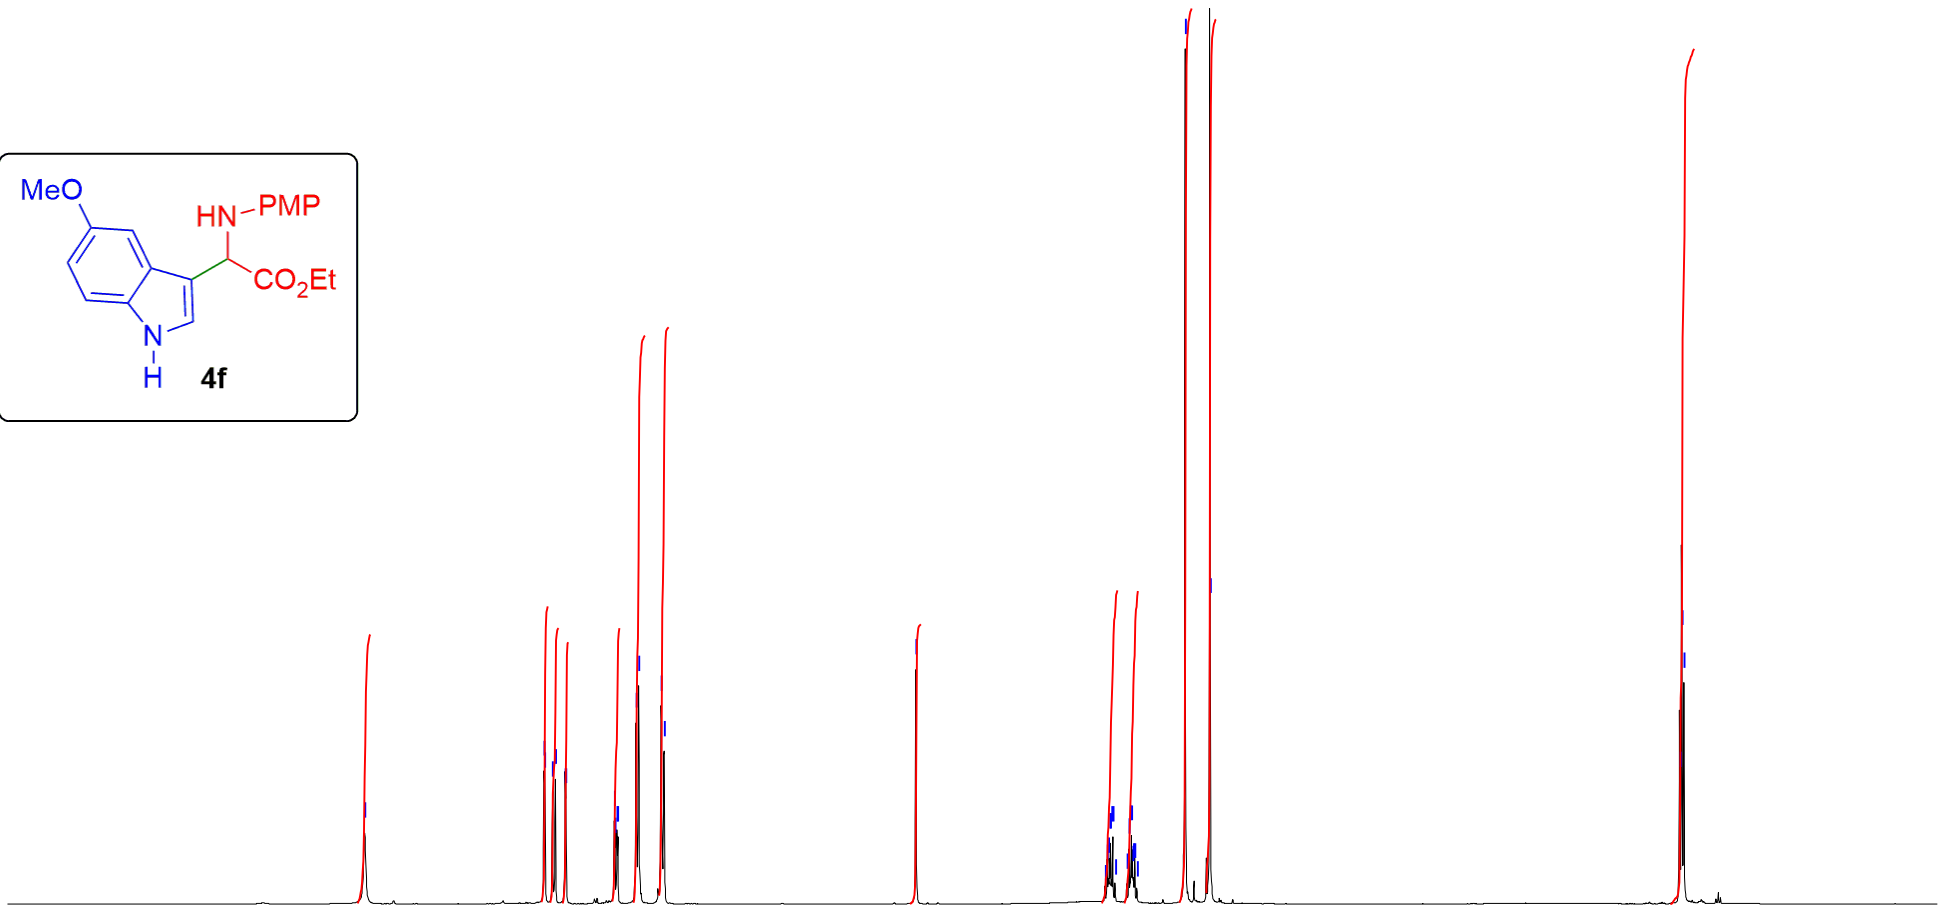

9.5 9.0 8.5 8.0 7.5 7.0 6.5 6.0 5.5 5.0 4.5 4.0 3.5 3.0 2.5 2.0 1.5 1.0 0.5 ppm

1.00  
1.11  
1.02  
0.98  
1.03  
2.11  
2.14

1.04

1.17  
1.16  
3.32  
3.28

3.17

<sup>13</sup>C NMR, 201.2 MHz, CDCl<sub>3</sub>

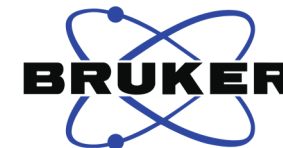

Current Data Parameters  
NAME barc-RC-2507-13C-Feb22  
EXPNO 2  
PROCNO 1

F2 - Acquisition Parameters  
Date\_ 20220209  
Time 12.45 h  
INSTRUM spect  
PROBHD 2555801\_0012 (  
PULPROG zgdc  
TD 16384  
SOLVENT CDCl3  
NS 232  
DS 4  
SWH 48543.688 Hz  
FIDRES 5.925743 Hz  
AQ 0.1687552 sec  
RG 71.8  
DW 10.300 usec  
DE 6.50 usec  
TE 298.0 K  
D1 3.0000000 sec  
D11 0.0300000 sec  
TD0 1  
SF01 201.1878208 MHz  
NUC1 13C  
P1 9.00 usec  
PLW1 312.79998779 W  
SF02 800.0332001 MHz  
NUC2 1H  
CPDPRG[2] waltz16  
PCPD2 60.00 usec  
PLW2 13.00000000 W  
PLW12 0.29249999 W

F2 - Processing parameters  
SI 16384  
SF 201.1677298 MHz  
WDW EM  
SSB 0  
LB 5.00 Hz  
GB 0  
PC 1.40

172.848  
154.166  
152.473  
140.771  
131.486  
126.134  
123.697  
114.810  
114.788  
112.734  
112.128  
112.092  
100.972  
CDCl<sub>3</sub>  
77.151  
76.991  
76.832  
61.408  
55.778  
55.627  
55.216  
14.089

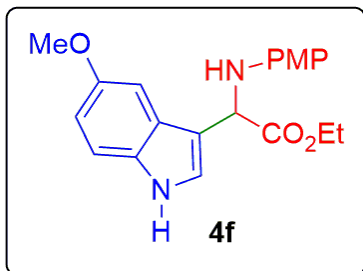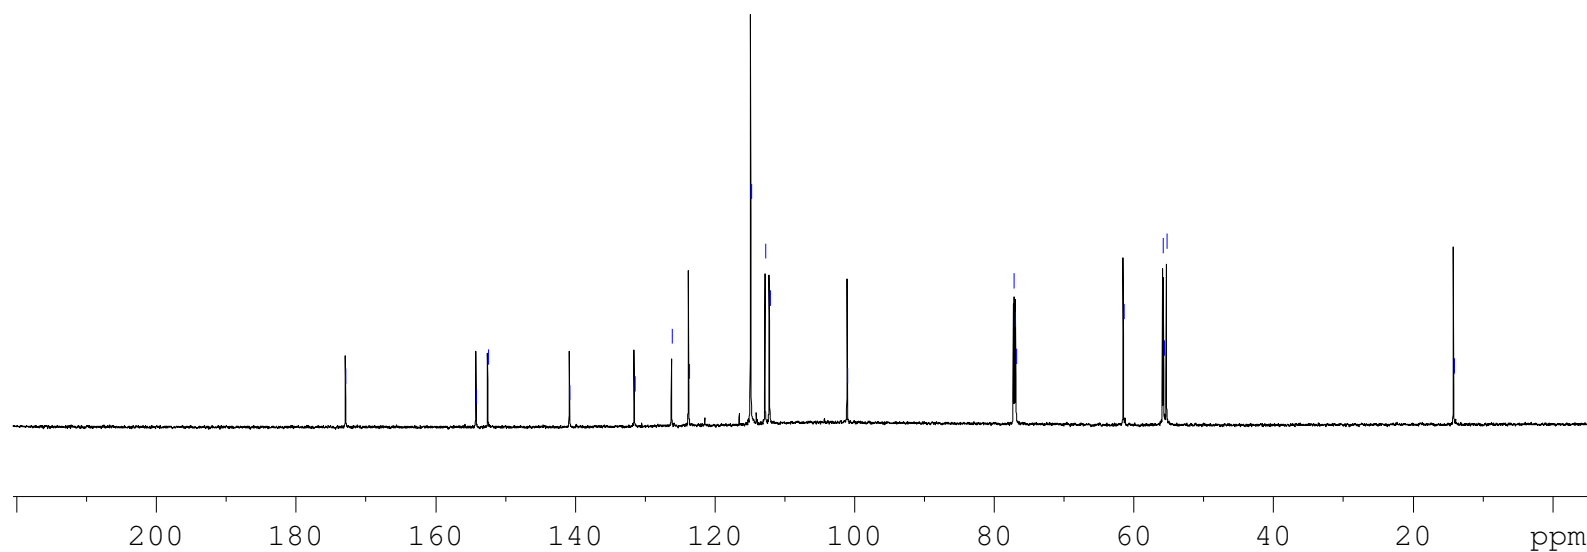

<sup>1</sup>H NMR, 600 MHz, CDCl<sub>3</sub>

CDCl<sub>3</sub>

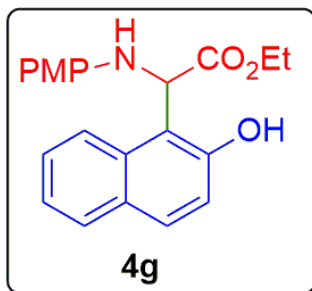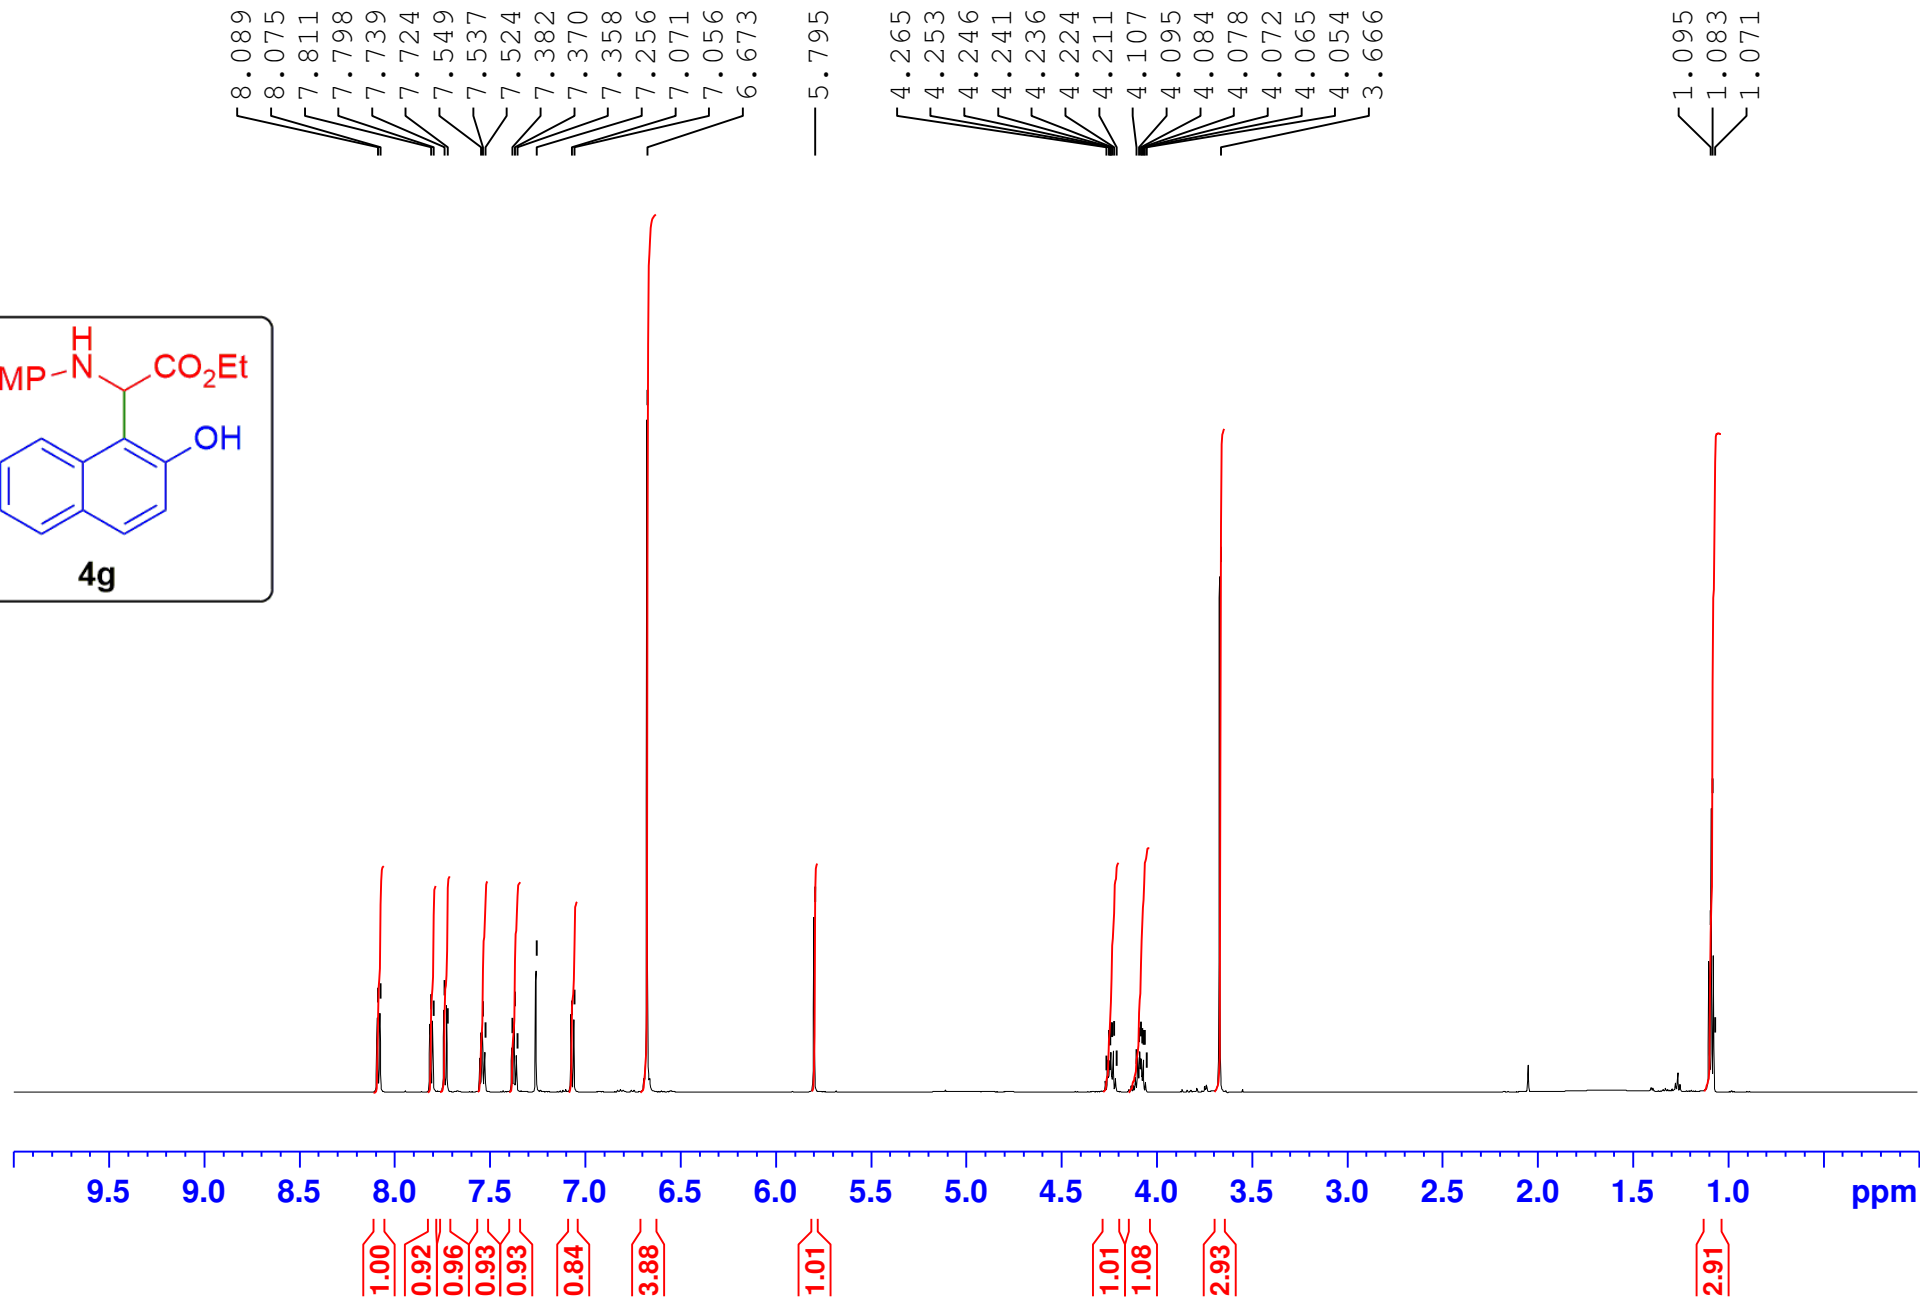

<sup>13</sup>C NMR, 201.2 MHz, CDCl<sub>3</sub>

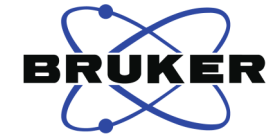

Current Data Parameters  
NAME barc-RC-2127-13C-2July21  
EXPNO 3  
PROCNO 1

F2 - Acquisition Parameters  
Date\_ 20210702  
Time 13.57 h  
INSTRUM spect  
PROBHD Z555801\_0012 ( )  
PULPROG zgdc  
TD 16384  
SOLVENT CDCl3  
NS 111  
DS 4  
SWH 48543.688 Hz  
FIDRES 5.925743 Hz  
AQ 0.1687552 sec  
RG 71.8  
DW 10.300 usec  
DE 6.50 usec  
TE 298.0 K  
D1 3.0000000 sec  
D11 0.03000000 sec  
TD0 1  
SFO1 201.1878208 MHz  
NUC1 13C  
P1 8.00 usec  
PLW1 312.79998779 W  
SFO2 800.0332001 MHz  
NUC2 1H  
CPDPRG2 waltz16  
PCPD2 60.00 usec  
PLW2 13.00000000 W  
PLW12 0.29249999 W

F2 - Processing parameters  
SI 16384  
SF 201.1677250 MHz  
WDW EM  
SSB 0  
LB 5.00 Hz  
GB 0  
PC 1.40

171.113  
156.003  
154.635  
138.696  
132.402  
130.526  
129.095  
128.924  
126.807  
122.892  
121.831  
119.715  
117.676  
114.695  
111.252  
CDCl<sub>3</sub>  
77.162  
77.002  
76.842  
62.333  
57.914  
55.401  
13.810

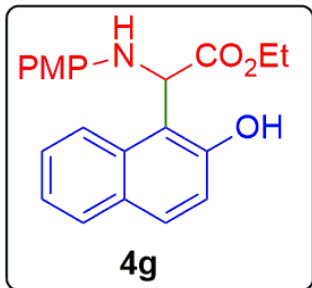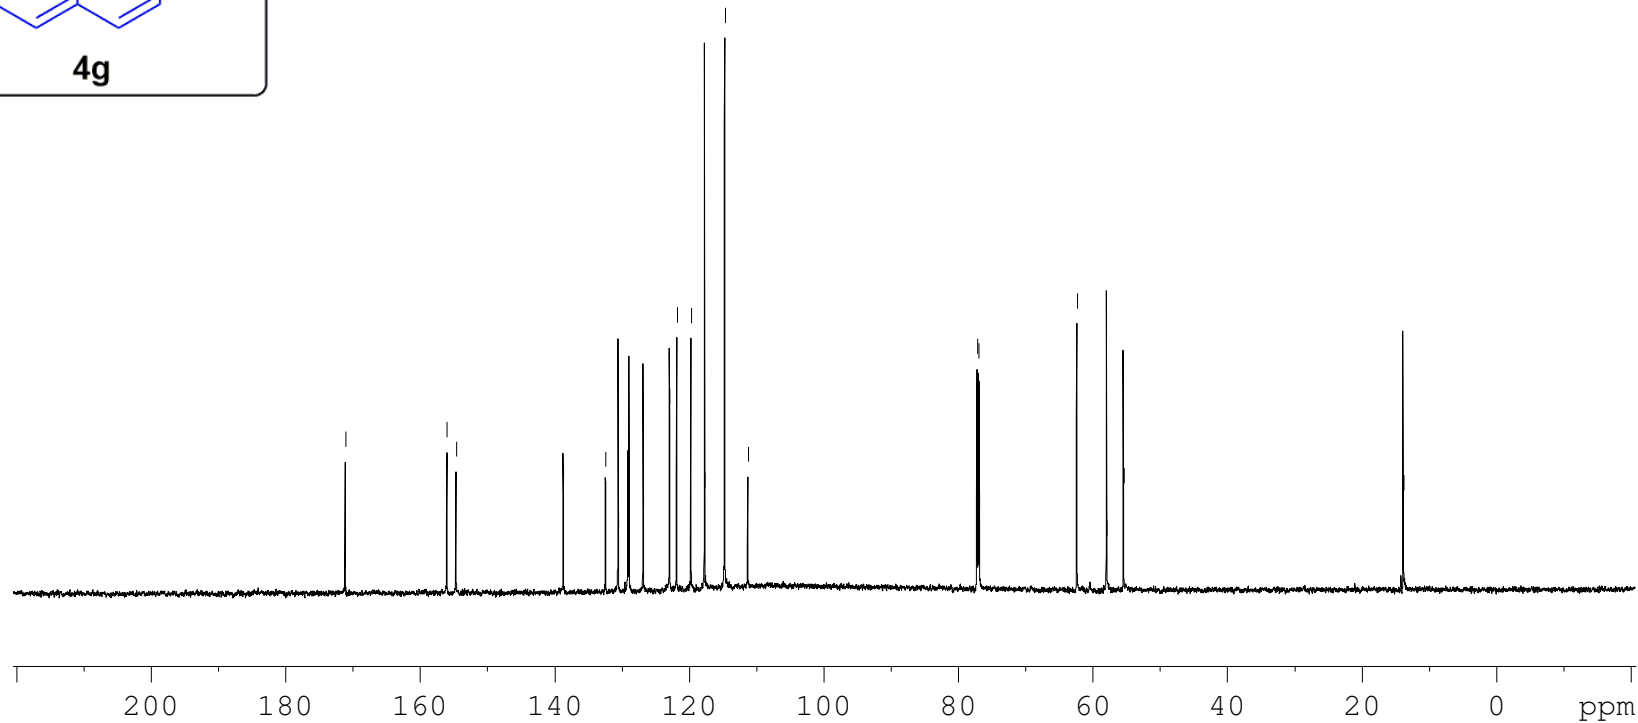

**<sup>1</sup>H NMR, 600 MHz, CDCl<sub>3</sub>**

CDCl<sub>3</sub>

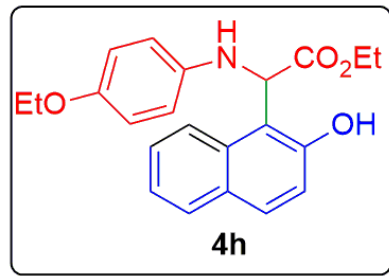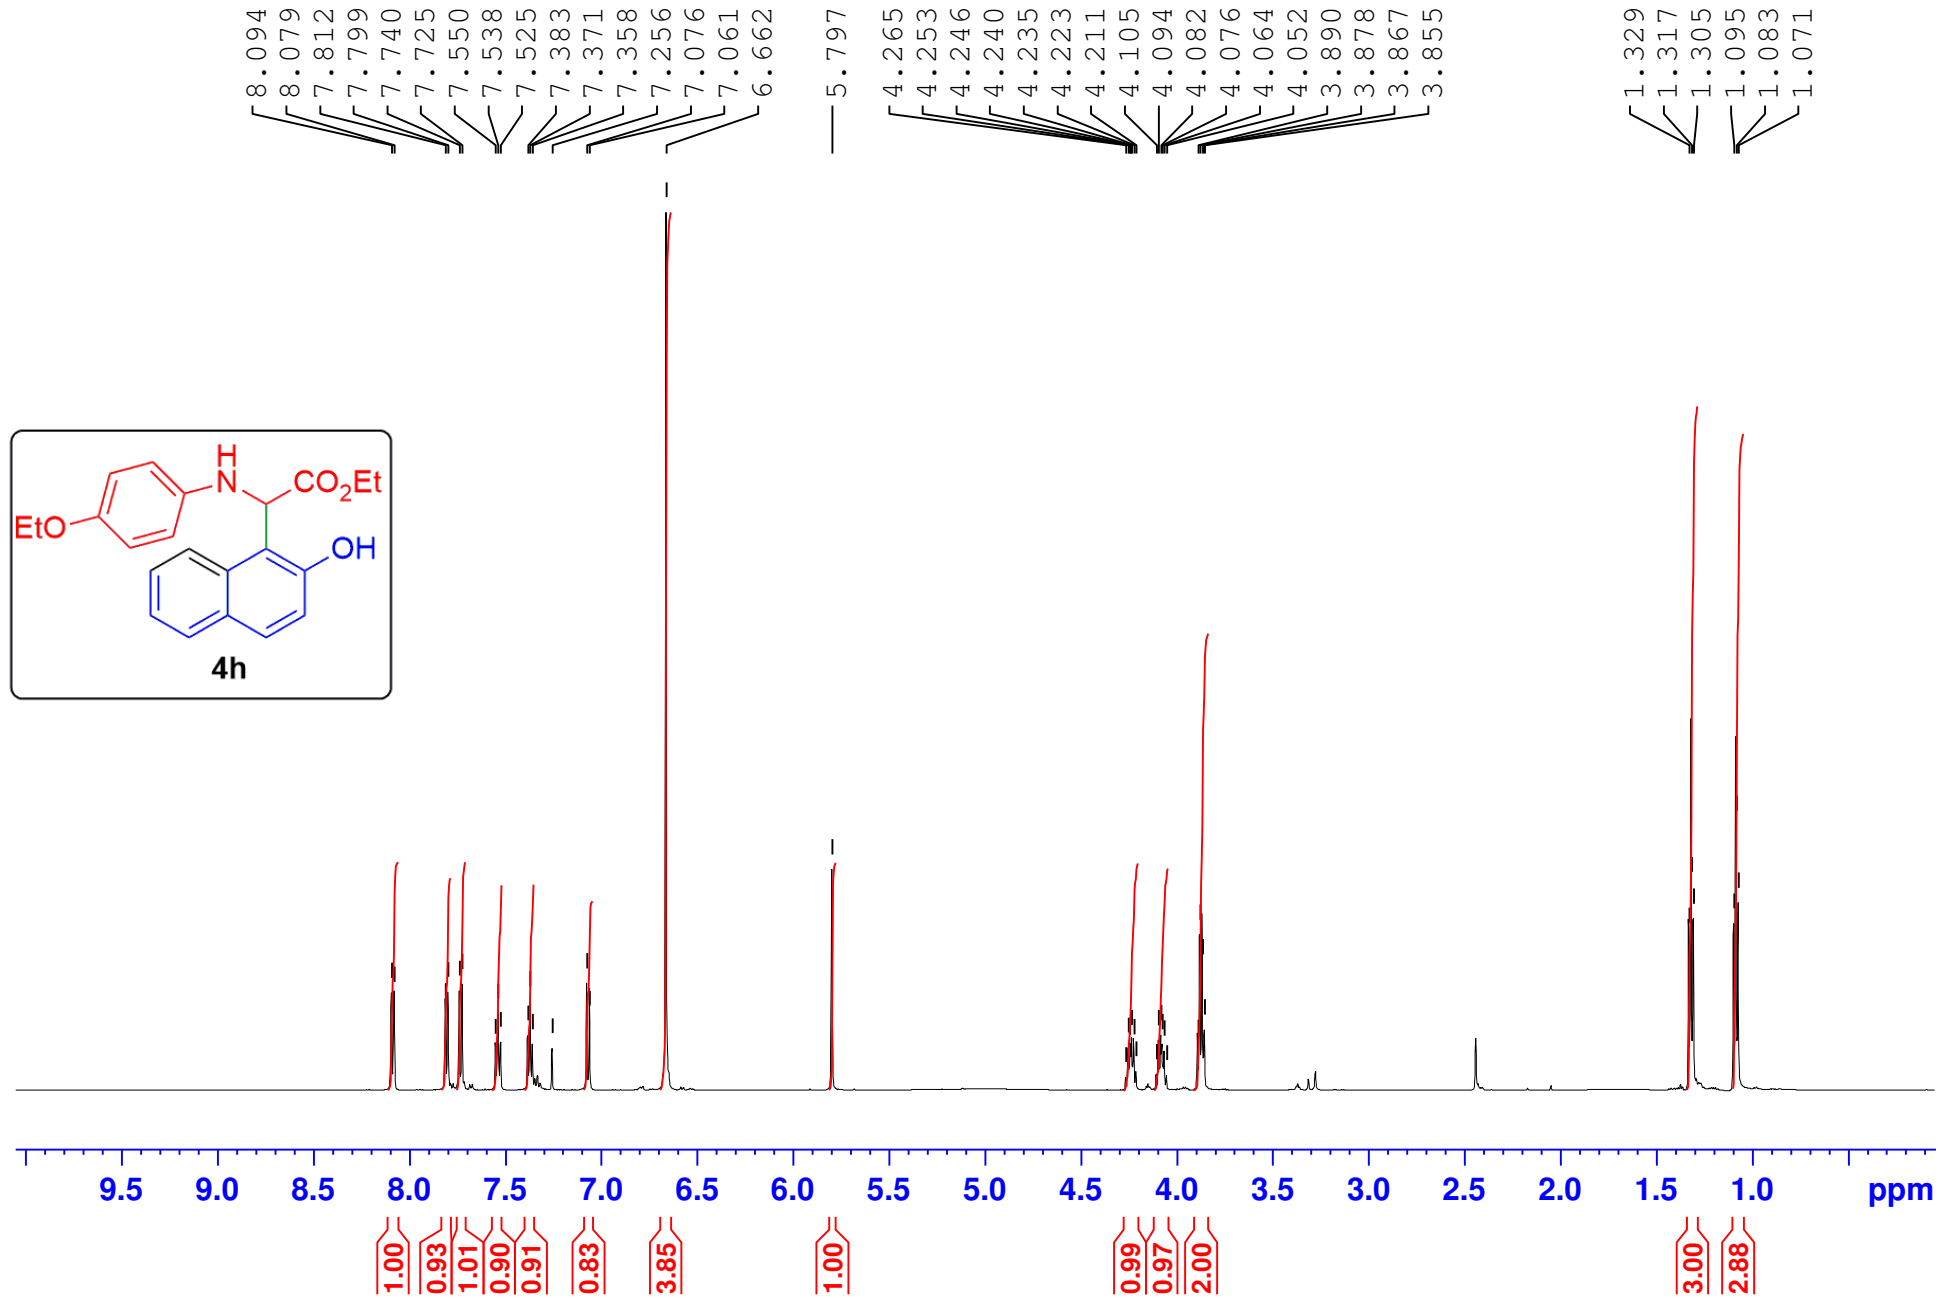

<sup>13</sup>C NMR, 201.2 MHz, CDCl<sub>3</sub>

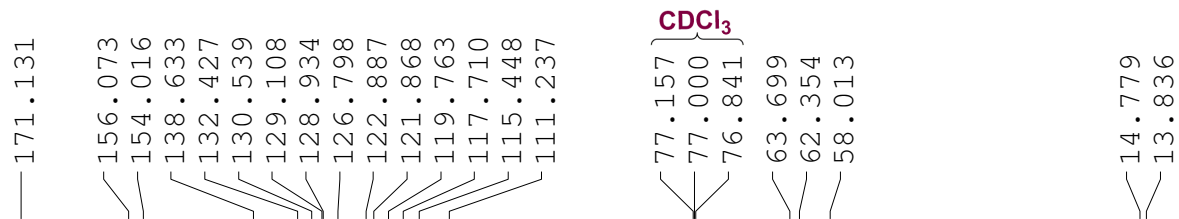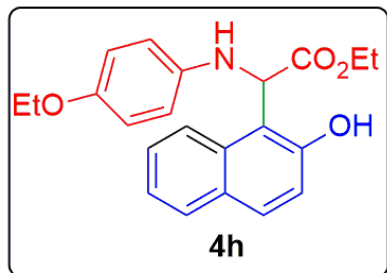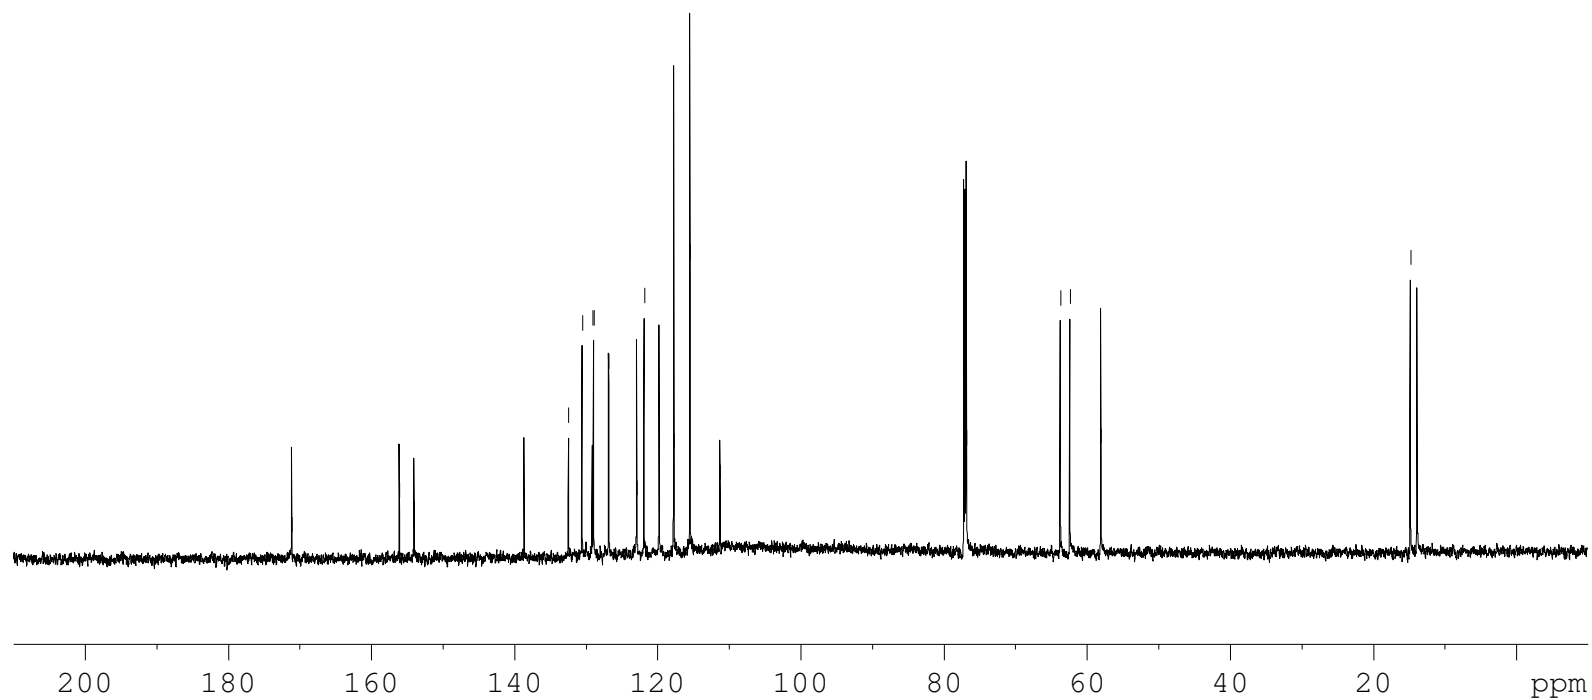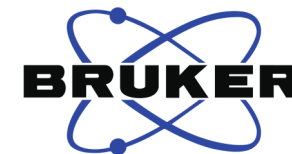

Current Data Parameters  
NAME barc-RC-2130-13C-2July21  
EXPNO 1  
PROCNO 1

F2 - Acquisition Parameters  
Date\_ 20210702  
Time 13.01 h  
INSTRUM spect  
PROBHD Z555801\_0012 (  
PULPROG zgdc  
TD 16384  
SOLVENT CDCl3  
NS 72  
DS 4  
SWH 48543.688 Hz  
FIDRES 5.925743 Hz  
AQ 0.1687552 sec  
RG 71.8  
DW 10.300 usec  
DE 6.50 usec  
TE 298.0 K  
D1 3.0000000 sec  
D11 0.03000000 sec  
TD0 1  
SF01 201.1878208 MHz  
NUC1 13C  
P1 8.00 usec  
PLW1 312.79998779 W  
SF02 800.0332001 MHz  
NUC2 1H  
CPDPRG[2] waltz16  
PCPD2 60.00 usec  
PLW2 13.00000000 W  
PLW12 0.29249999 W

F2 - Processing parameters  
SI 16384  
SF 201.1677179 MHz  
WDW EM  
SSB 0  
LB 5.00 Hz  
GB 0  
PC 1.40



<sup>1</sup>H NMR, 600 MHz, CDCl<sub>3</sub>

CDCl<sub>3</sub>

8.281  
8.268  
7.793  
7.780  
7.506  
7.495  
7.480  
7.465  
7.454  
7.429  
7.415  
7.369  
7.355  
7.255  
6.794  
6.780  
6.751  
6.736  
5.083  
4.309  
4.298  
4.292  
4.286  
4.280  
4.274  
4.267  
4.256  
4.196  
4.184  
4.173  
4.167  
4.161  
4.155  
4.143  
3.705  
1.226  
1.214  
1.202

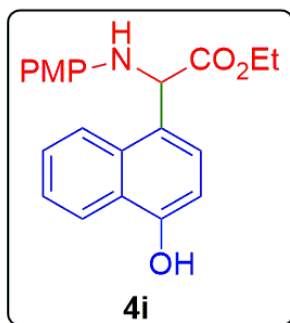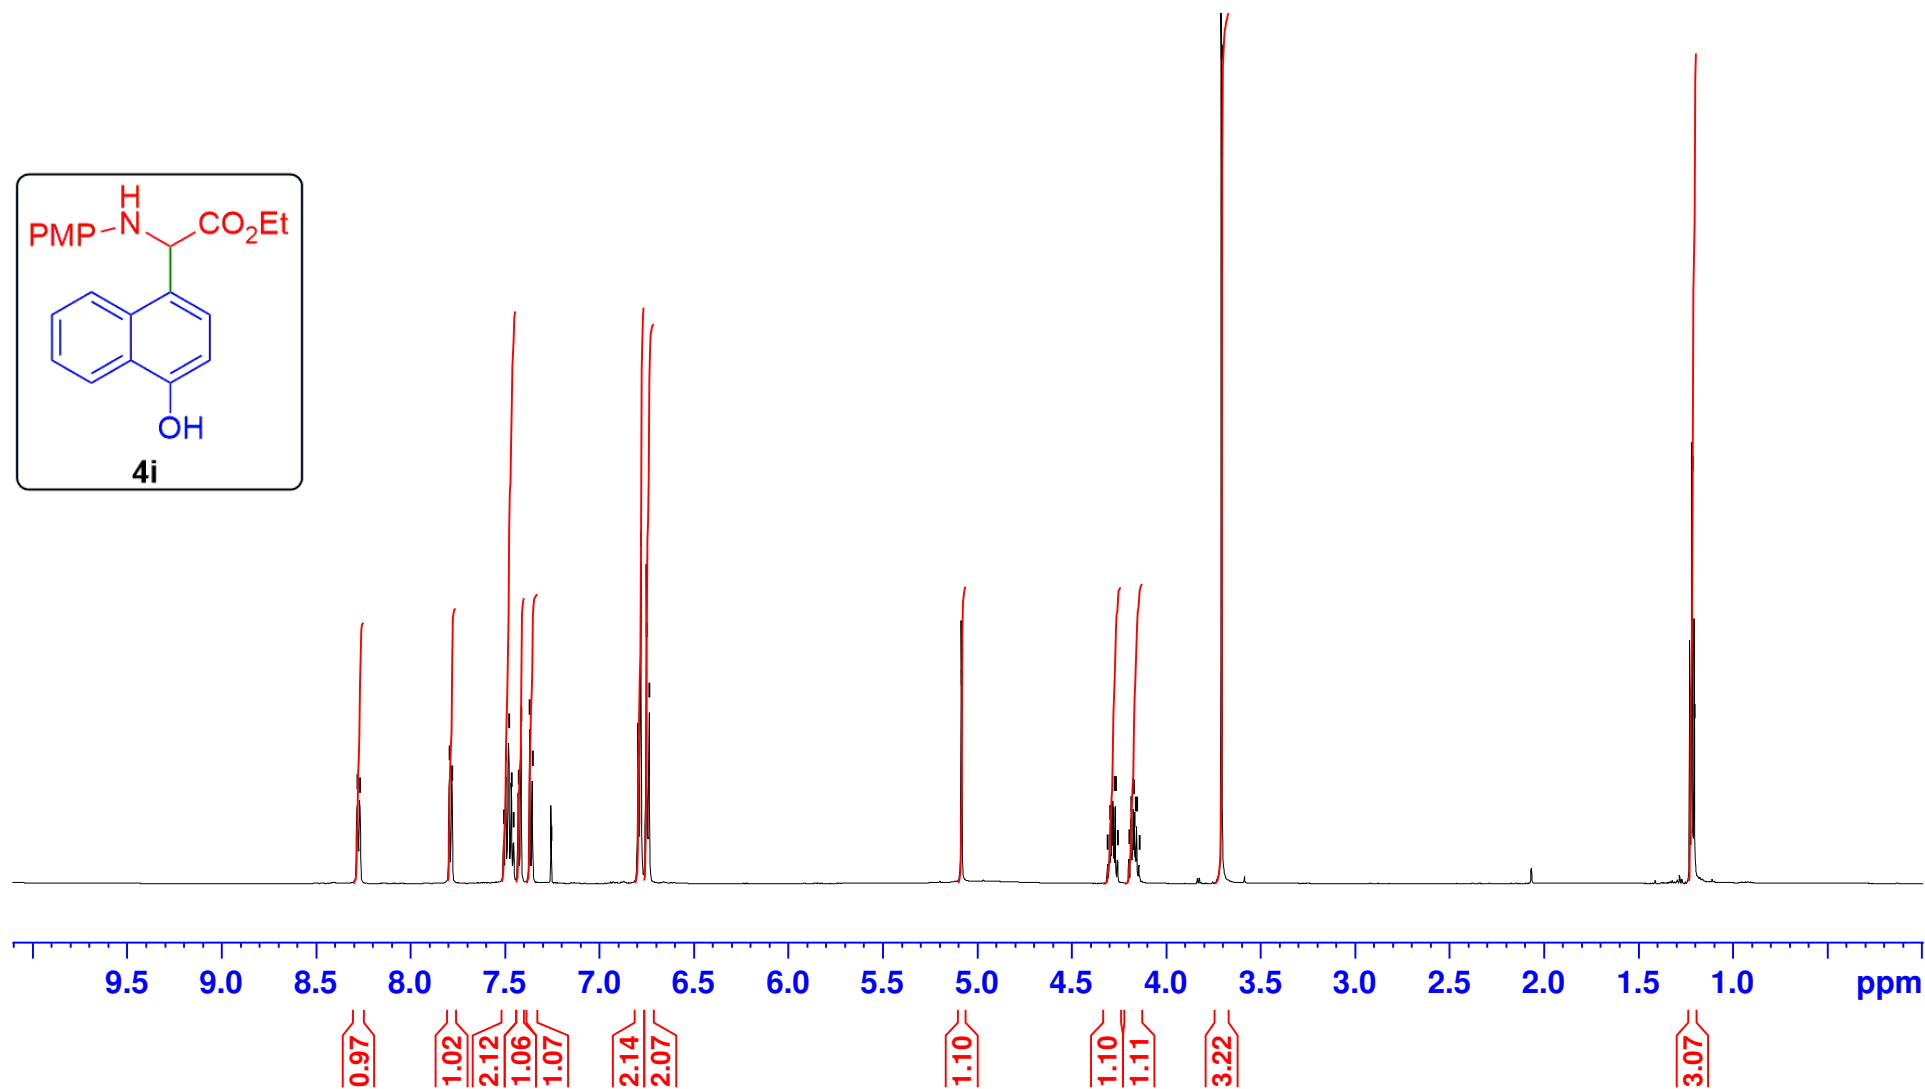

<sup>13</sup>C NMR, 201.2 MHz, CDCl<sub>3</sub>

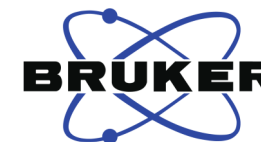

—171.168  
154.653  
152.959  
138.825  
134.156  
127.162  
126.790  
126.633  
125.441  
125.134  
122.366  
119.356  
117.863  
114.698  
113.225  
77.156 } CDCl<sub>3</sub>  
76.997 }  
76.838 }  
63.422  
62.364  
—55.450  
—13.925

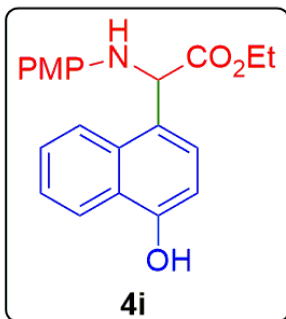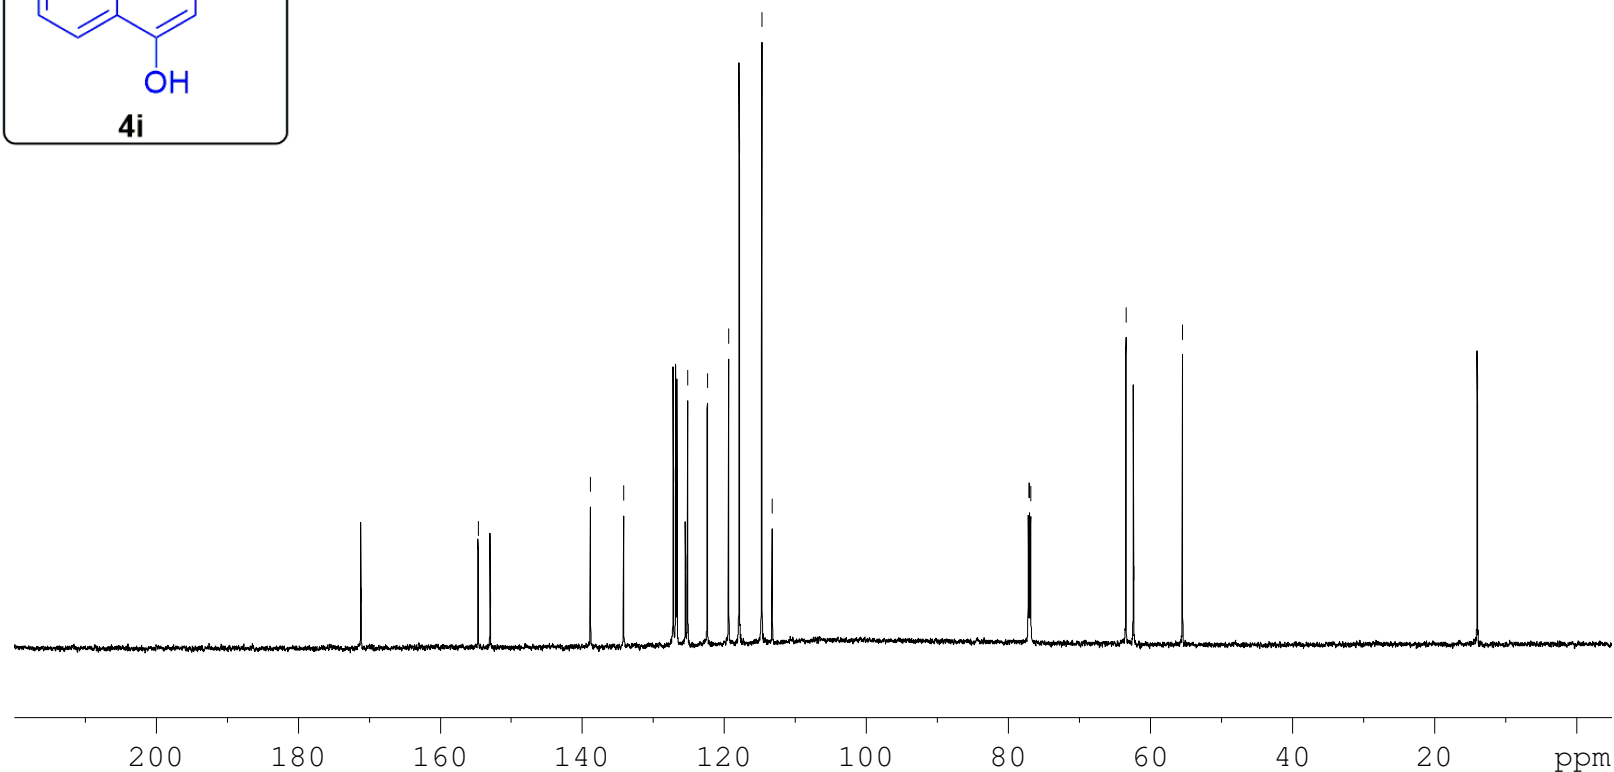

Current Data Parameters  
NAME barc-RC-2504-13C-Feb22  
EXPNO 5  
PROCNO 1

F2 - Acquisition Parameters  
Date\_ 20220209  
Time 14.09 h  
INSTRUM spect  
PROBHD Z555801\_0012 ( )  
PULPROG zgdc  
TD 16384  
SOLVENT CDCl3  
NS 151  
DS 4  
SWH 48543.688 Hz  
FIDRES 5.925743 Hz  
AQ 0.1687552 sec  
RG 71.8  
DW 10.300 usec  
DE 6.50 usec  
TE 298.0 K  
D1 3.0000000 sec  
D11 0.0300000 sec  
TD0 1  
SFO1 201.1878208 MHz  
NUC1 13C  
P1 9.00 usec  
PLW1 312.79998779 W  
SFO2 800.0332001 MHz  
NUC2 1H  
CPDPRG[2] waltz16  
PCPD2 60.00 usec  
PLW2 13.0000000 W  
PLW12 0.29249999 W

F2 - Processing parameters  
SI 16384  
SF 201.1677259 MHz  
WDW EM  
SSB 0  
LB 5.00 Hz  
GB 0  
PC 1.40

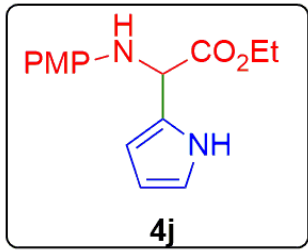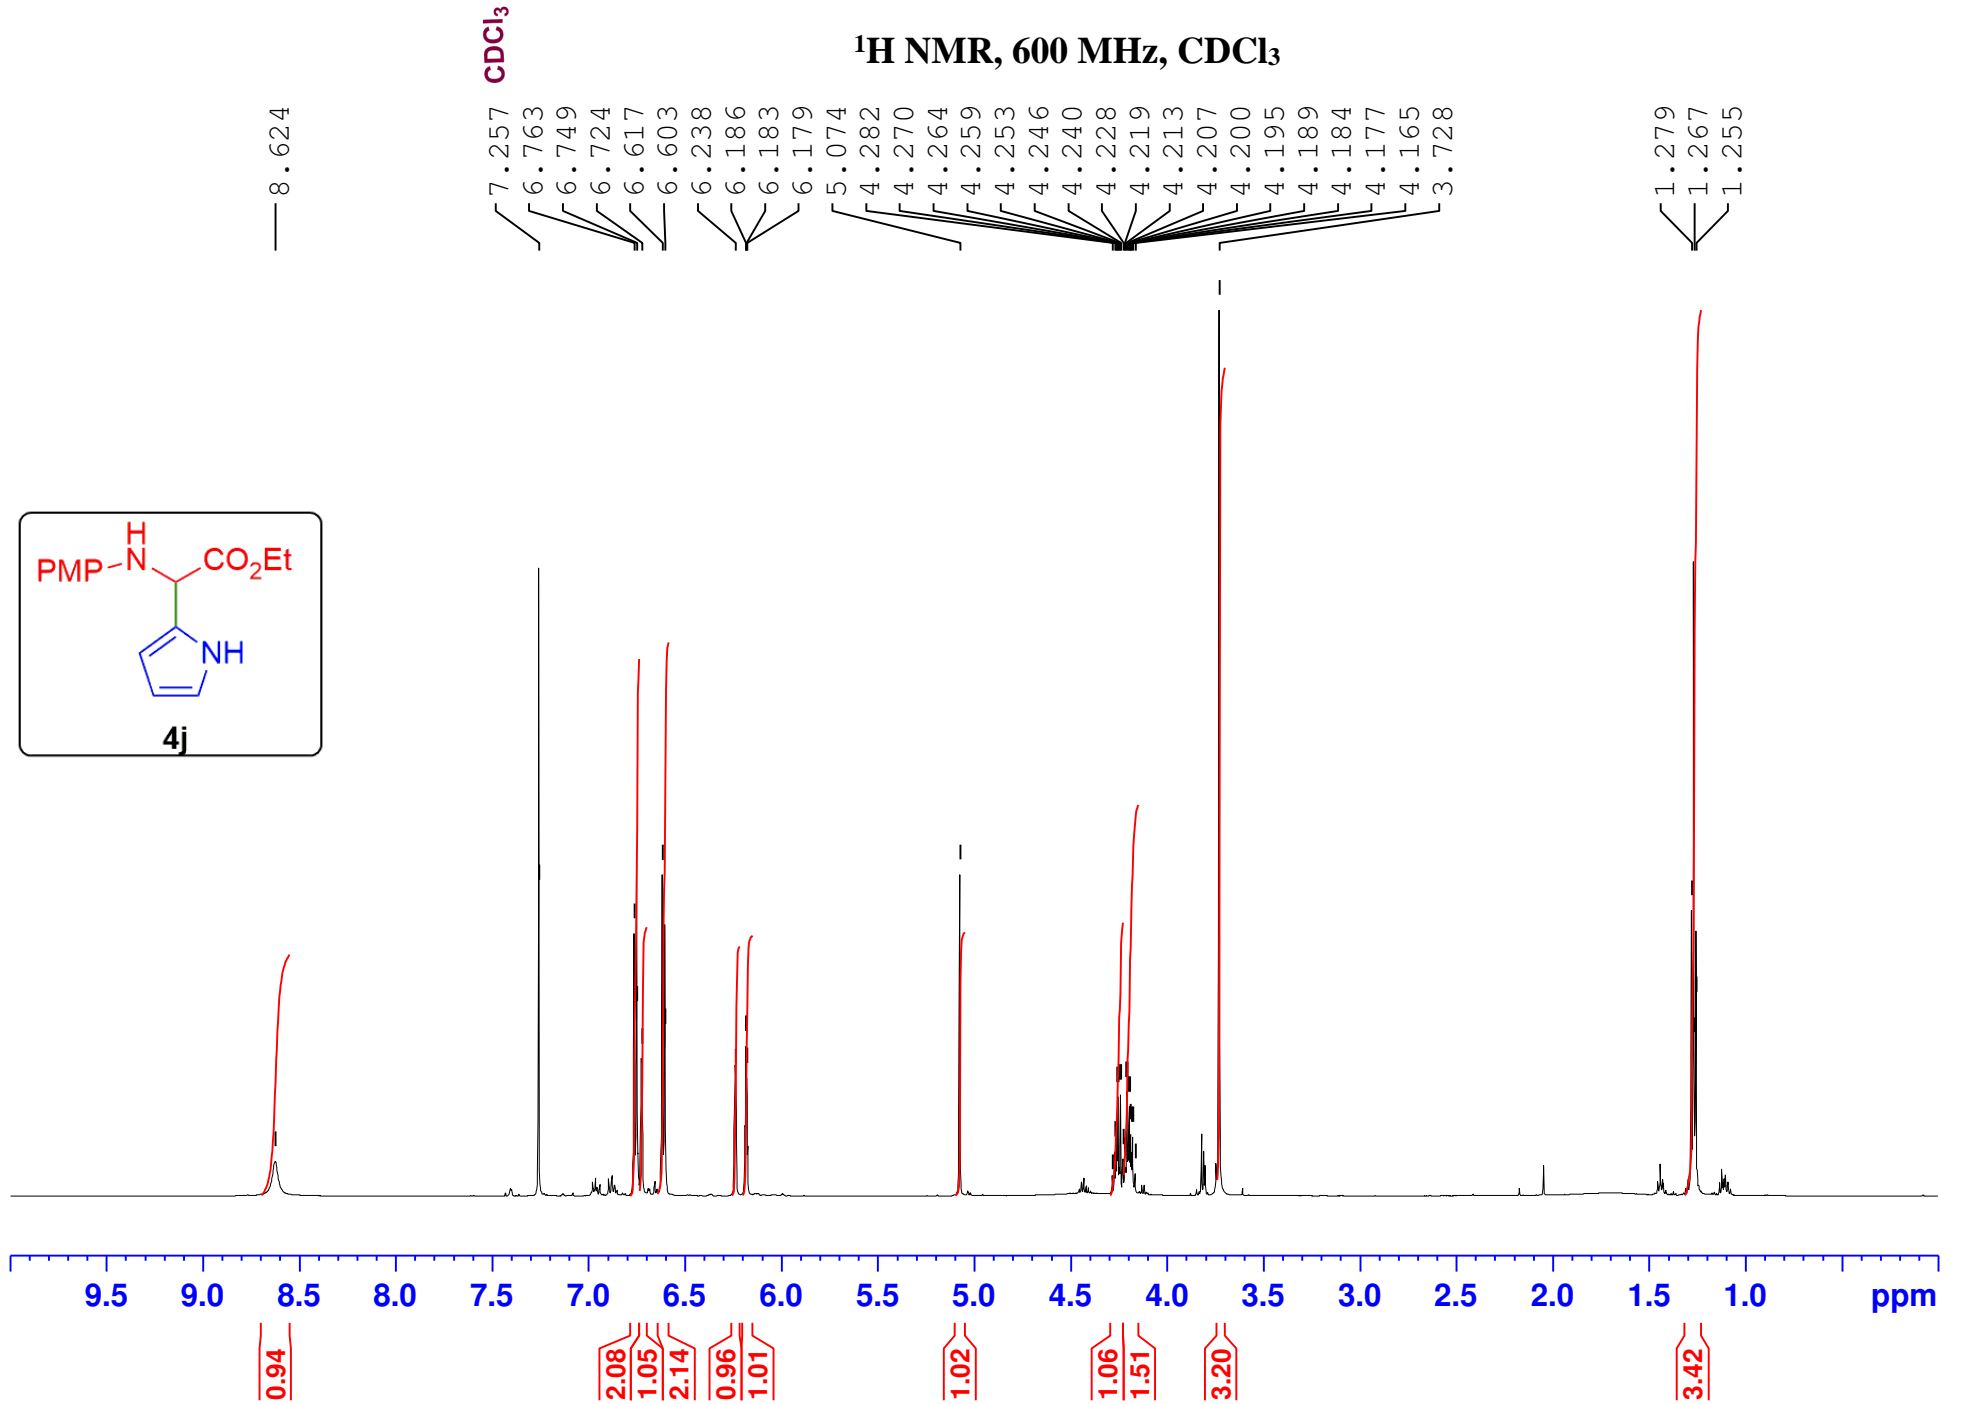

<sup>13</sup>C NMR, 201.2 MHz, CDCl<sub>3</sub>

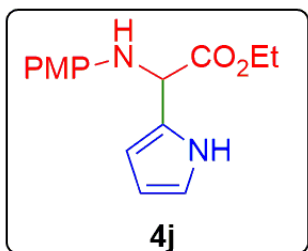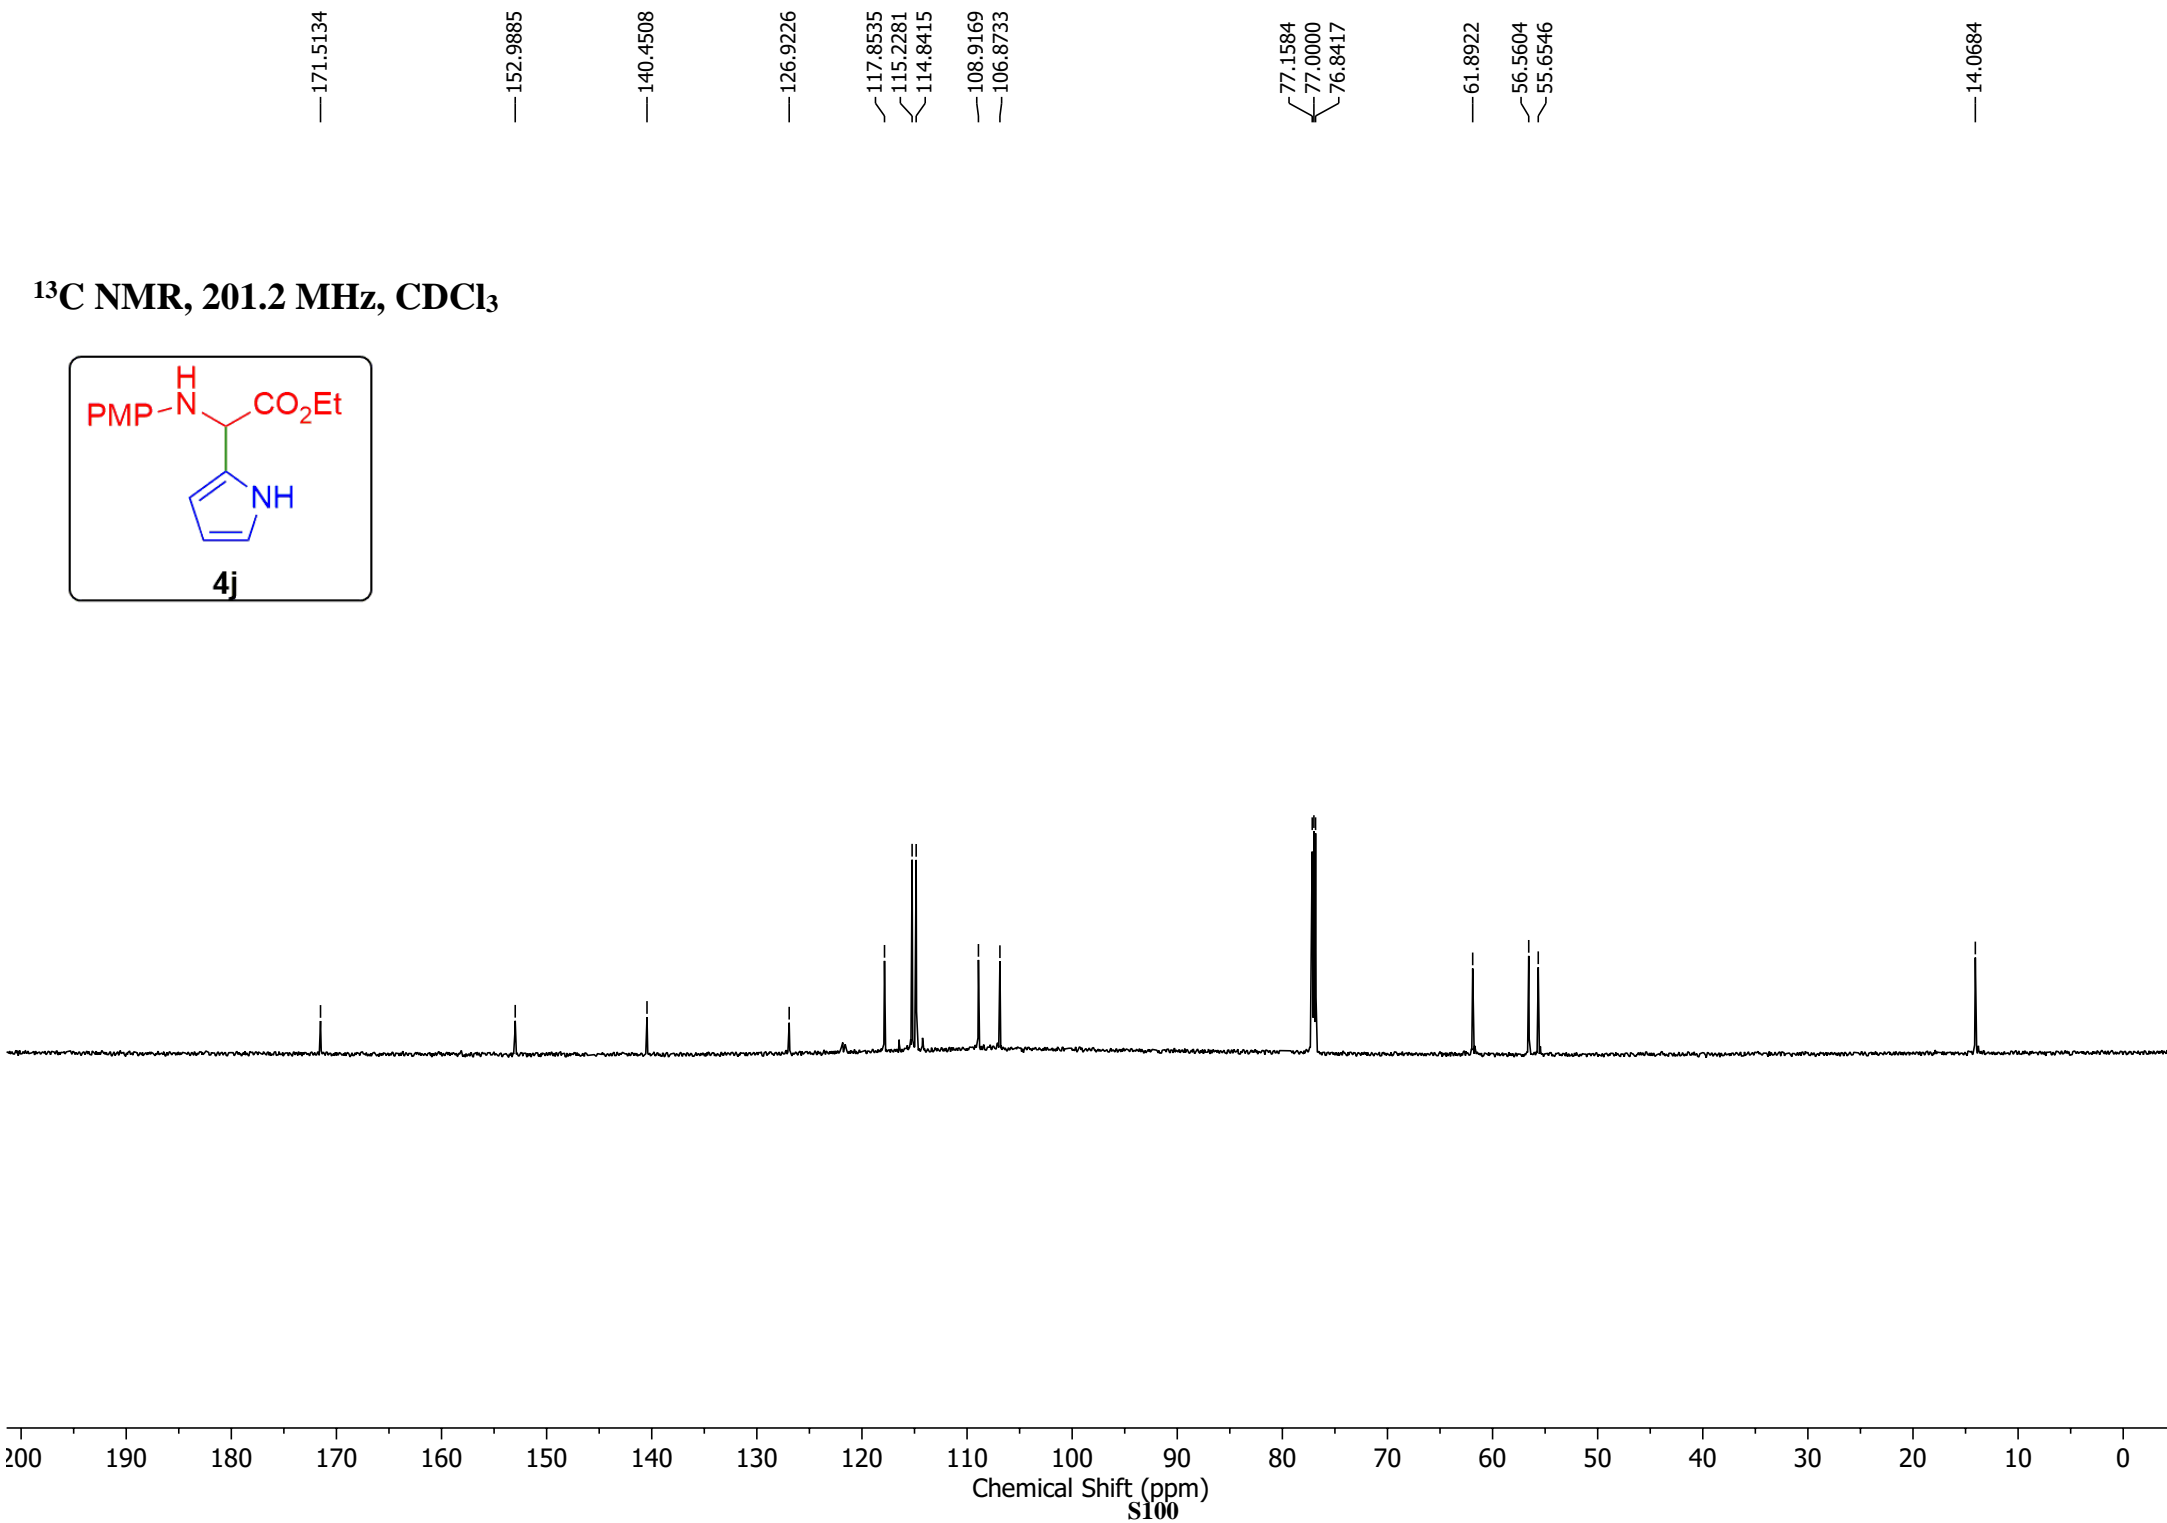

**<sup>1</sup>H NMR, 600 MHz, CDCl<sub>3</sub>**

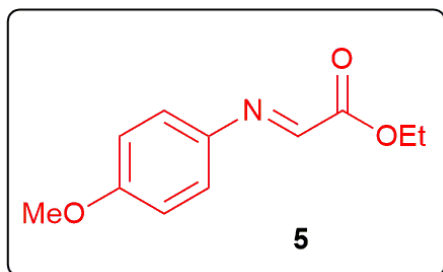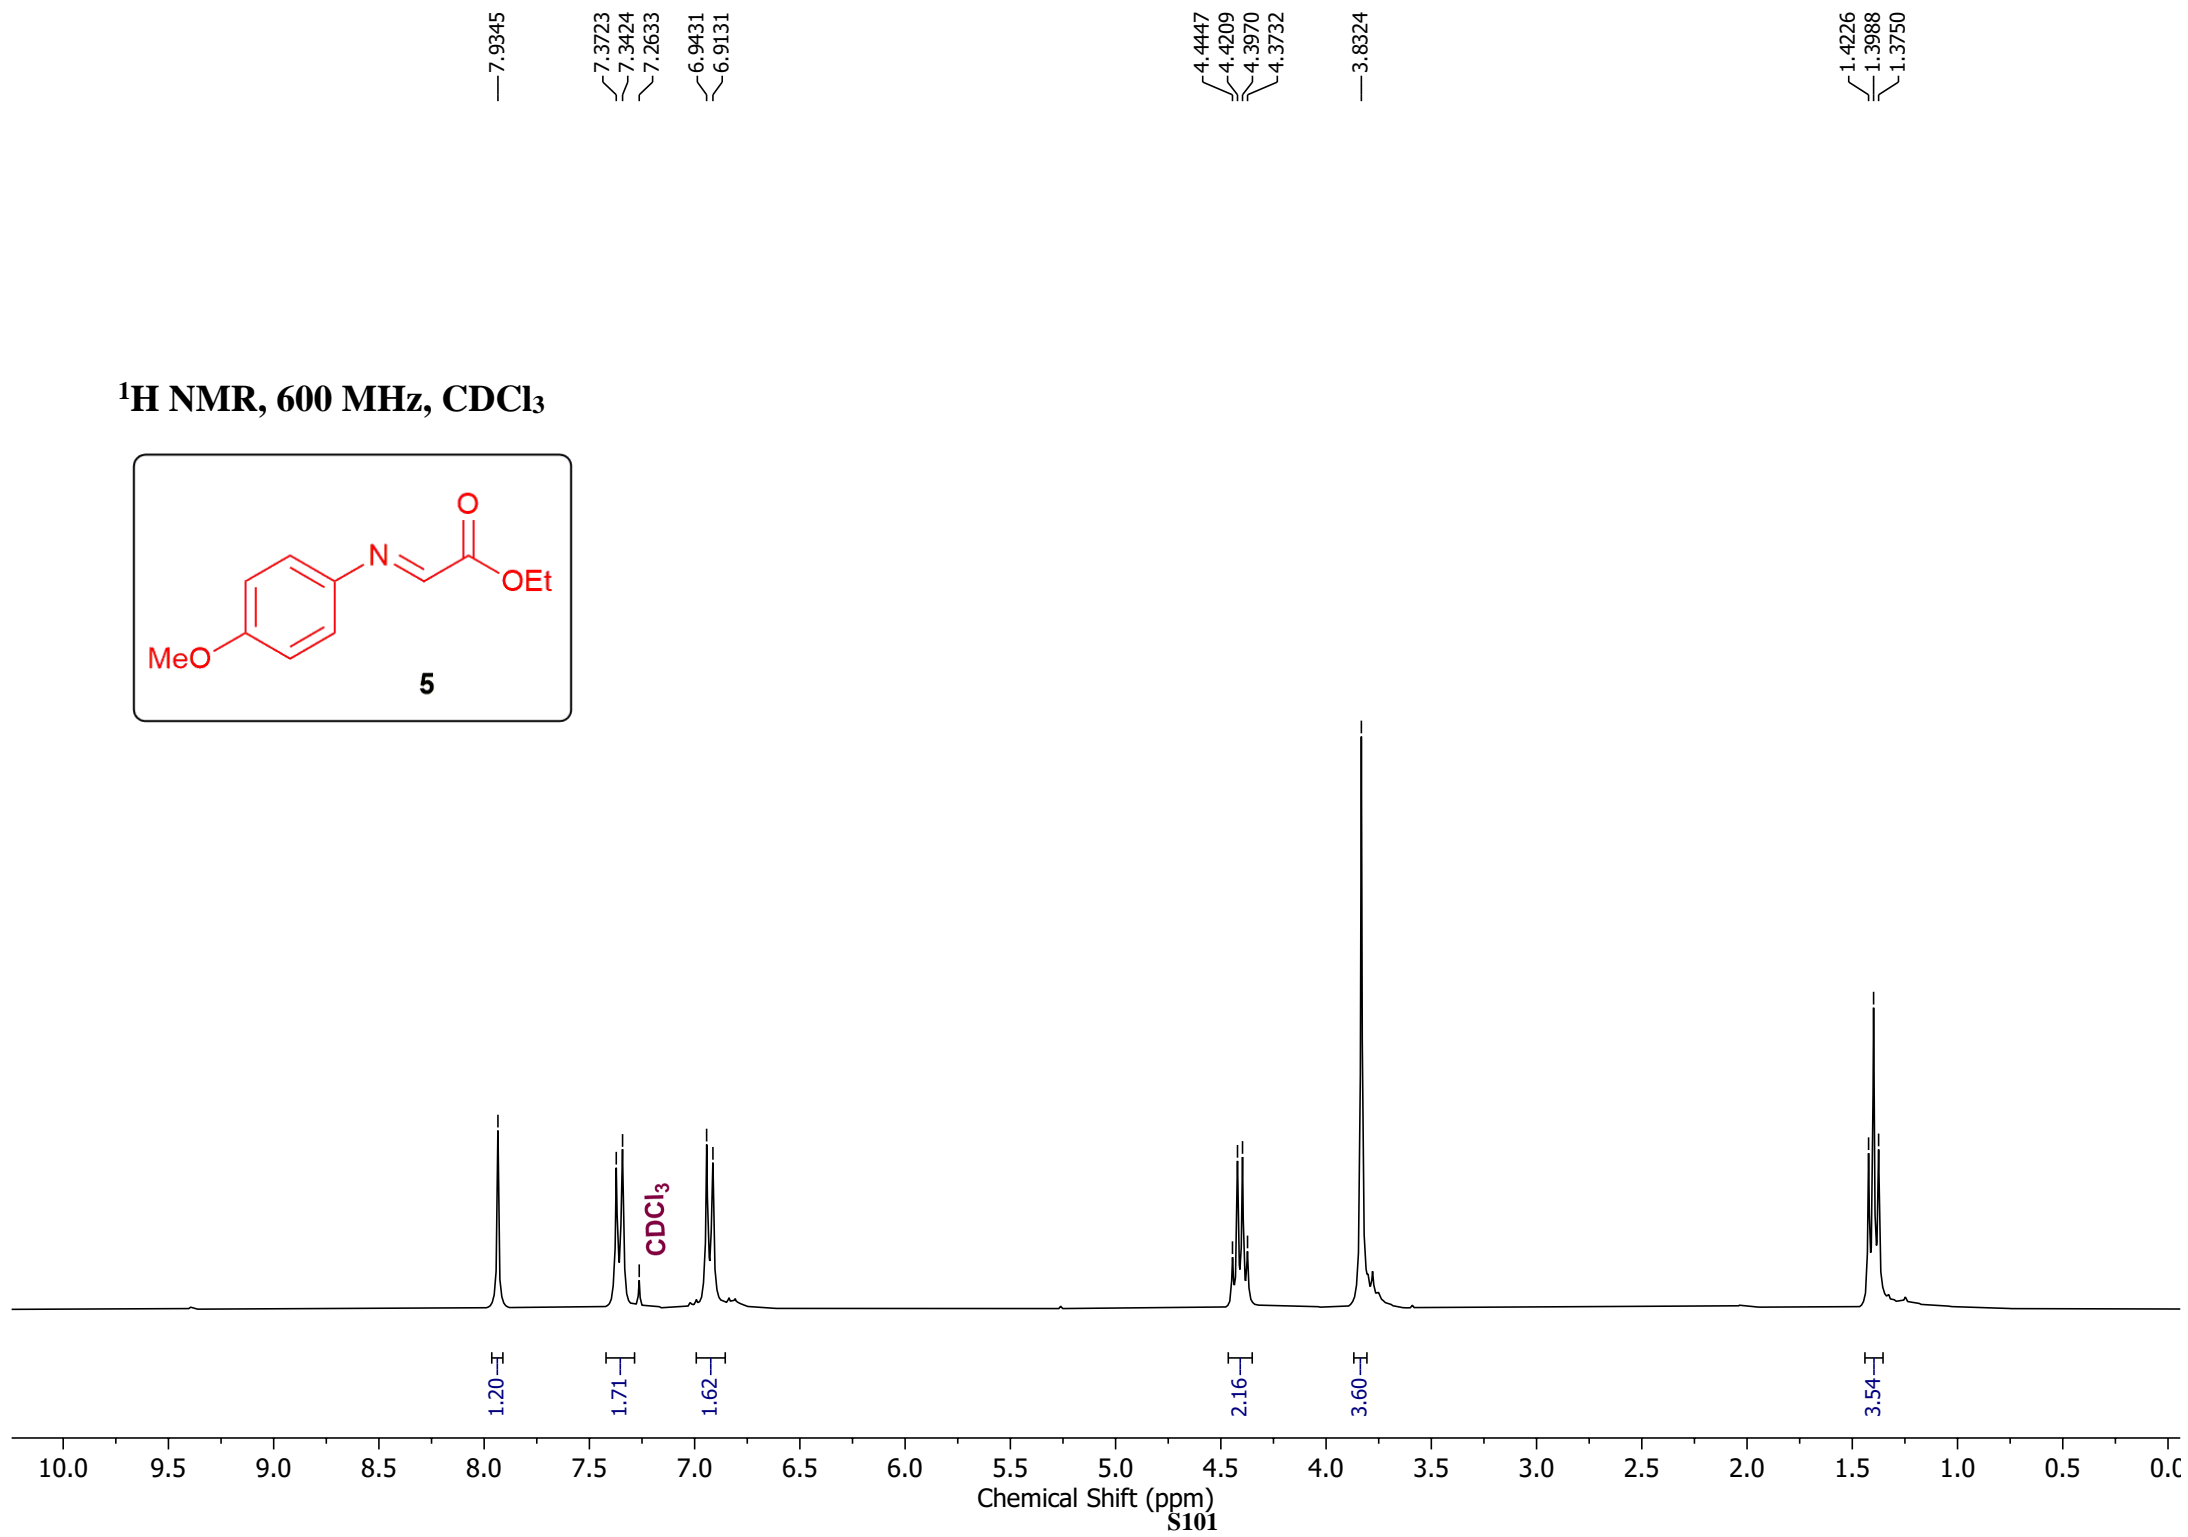

**<sup>13</sup>C NMR, 75 MHz, CDCl<sub>3</sub>**

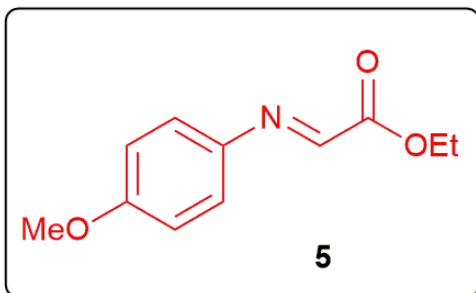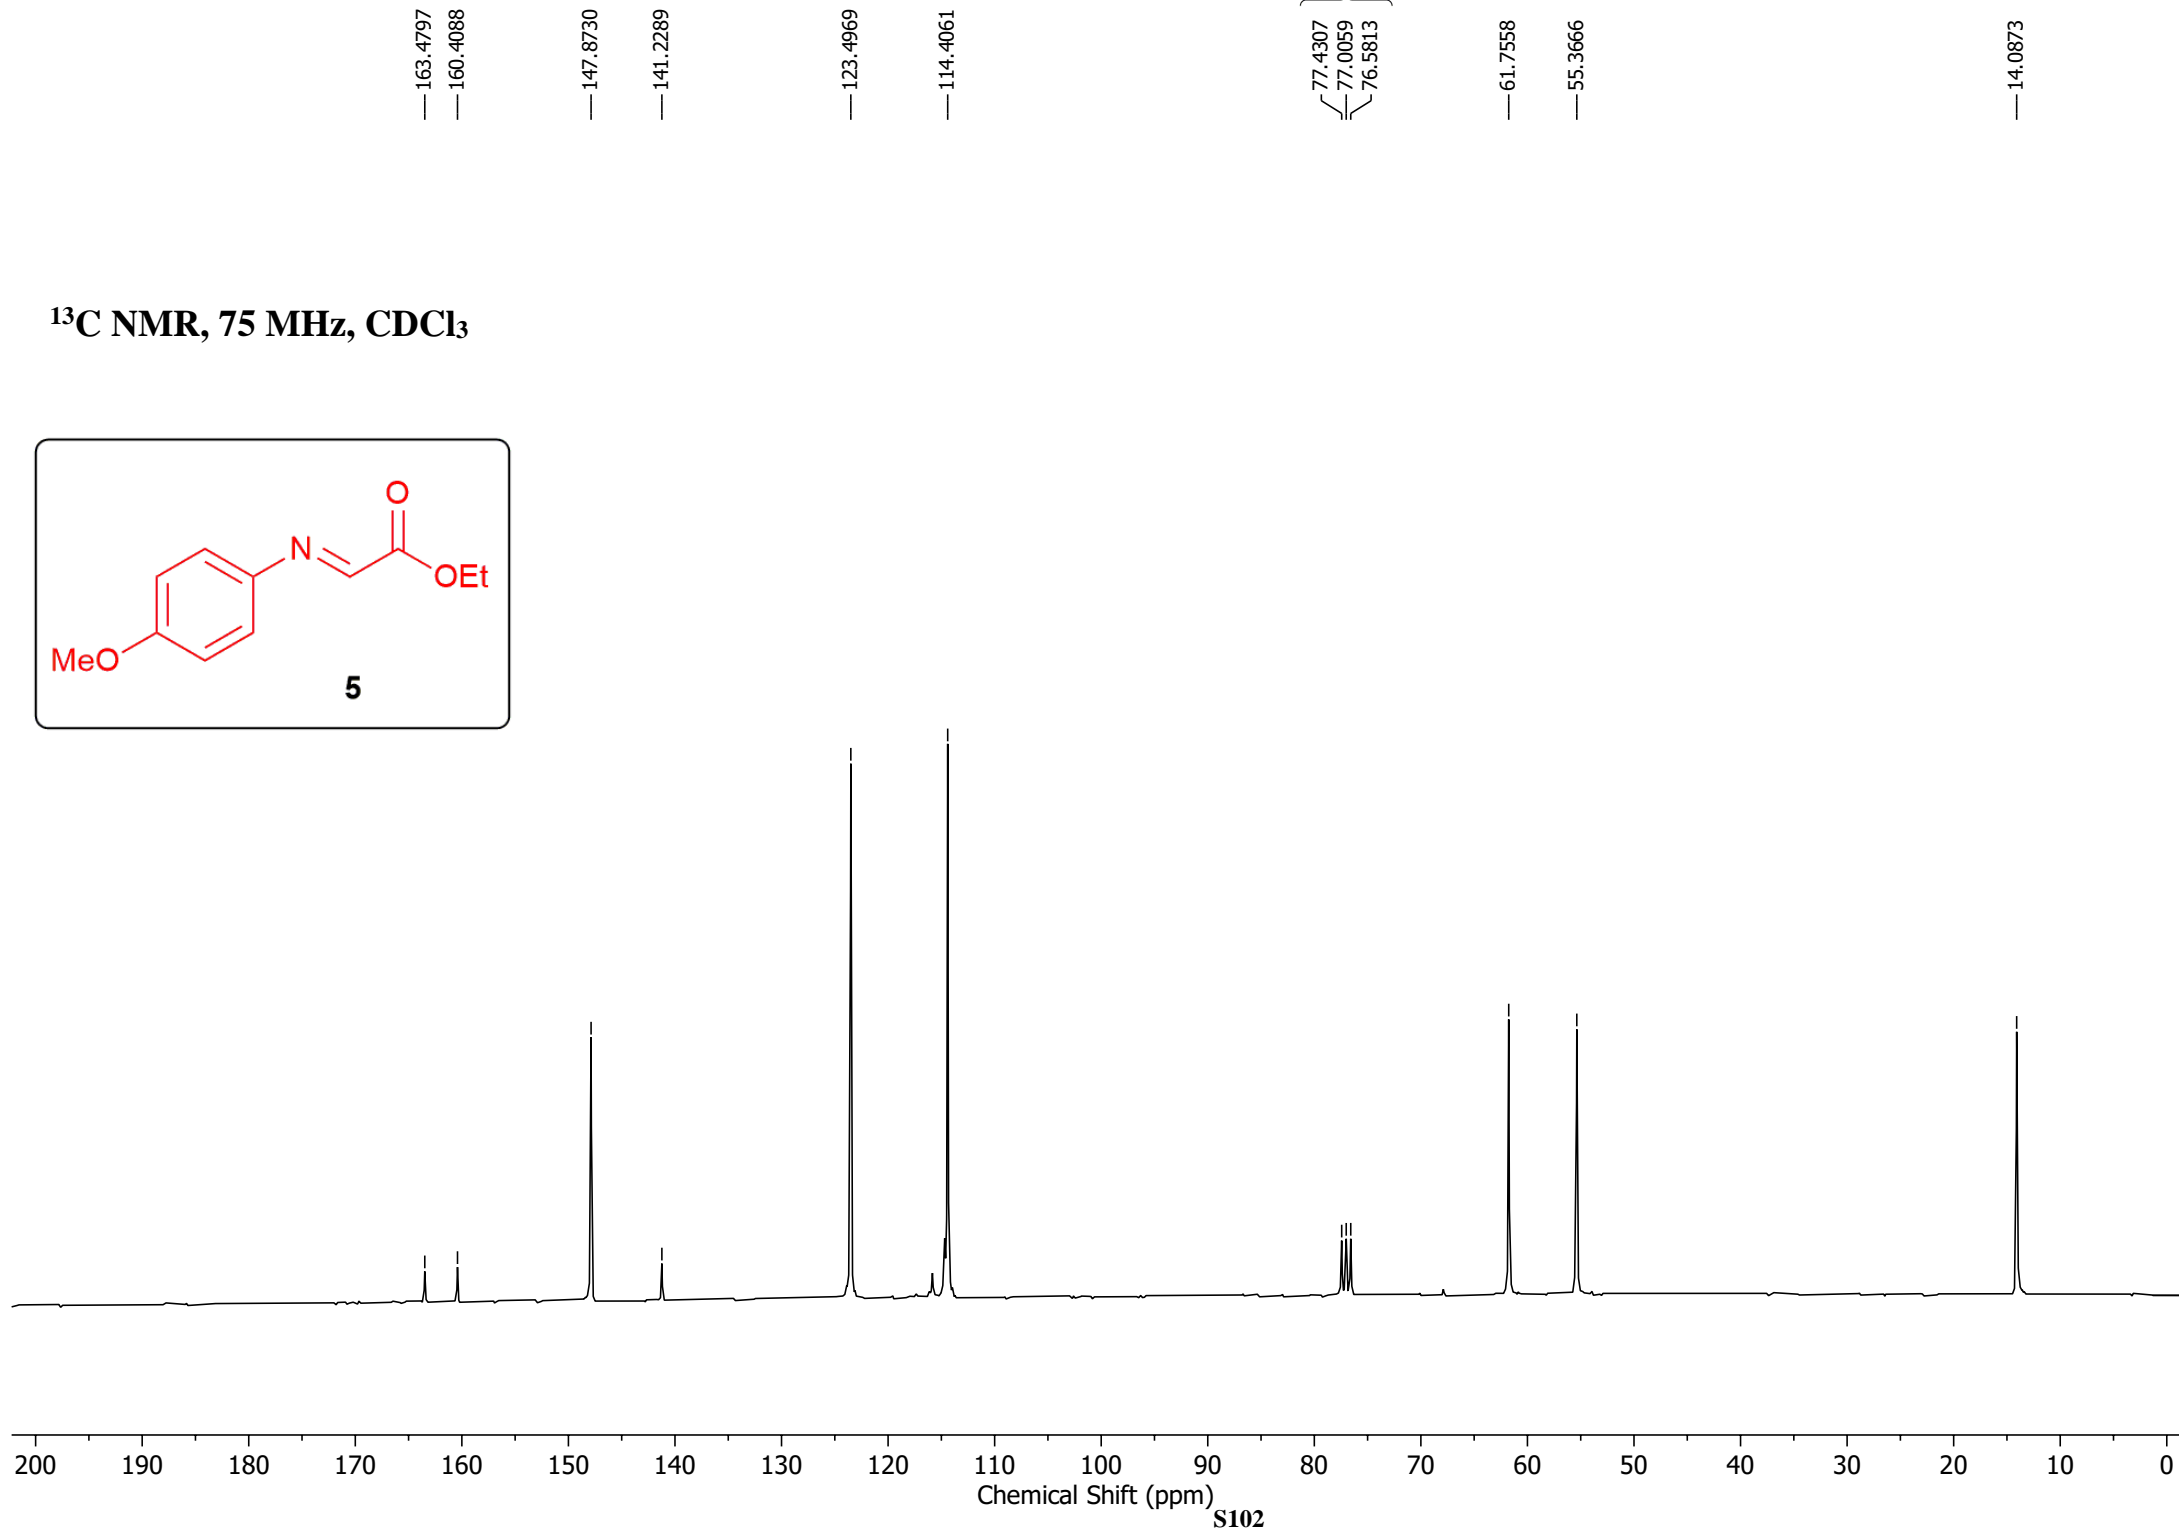

Supplement: d2ob00678b2.pdf [file d2ob00678b2.pdf]
